# Supplementary material for: The Bromodomain Inhibitor PFI-3 Sensitizes Cancer Cells to DNA Damage by Targeting SWI/SNF
Source: Oxford University Press journal article supplement (doi:10.1158/1541-7786.mcr-20-0289), 2020-11-18
Supplement: 15417786mcr200289-sup-240314_3_supp_6696269_qj7h31.xlsx [file 15417786mcr200289-sup-240314_3_supp_6696269_qj7h31.xlsx]

## Sheet: fc2
Table S1. DEG analysis for fc2 genes in A549 cells treated with doxorubicin and/or PFI-3
A549_1: DMSO for 8 h; A549_2: PFI-3 for 8 h; A549_3: Dox for 2h and DMSO for 8 h; A549_4: Dox for 2 h and PFI-3 for 8 h.
Gene_ID	Transcript_ID	Gene_Symbol	Description	A549_2/A549_1.fc	A549_2/A549_1.volume	A549_3/A549_1.fc	A549_3/A549_1.volume	A549_4/A549_1.fc	A549_4/A549_1.volume	A549_4/A549_2.fc	A549_4/A549_2.volume	A549_4/A549_3.fc	A549_4/A549_3.volume	A549_2.mean	A549_1.mean	A549_3.mean	A549_4.mean	N_A549_1	N_A549_2	N_A549_3	N_A549_4	A549_1_Read_Count	A549_2_Read_Count	A549_3_Read_Count	A549_4_Read_Count	A549_1_FPKM	A549_2_FPKM	A549_3_FPKM	A549_4_FPKM
43	NM_000665,NM_001282449,NM_001302621,NM_001302622	ACHE	acetylcholinesterase (Cartwright blood group)	1.51567	1.2177	-1.18249	0.824394	2.15909	1.40351	1.42451	1.79123	2.55311	1.21268	1.55409	0.954129	0.7123	2.06456	0.954129	1.55409	0.7123	2.06456	132	335	118	485	0.872218	1.94548	0.620016	3.33968
59	NM_001141945,NM_001320855,NM_001613	ACTA2	actin, alpha 2, smooth muscle, aorta	2.46101	3.83497	1.11156	3.31539	4.35867	4.16879	1.77109	4.93435	3.92121	4.26582	4.53923	3.23998	3.39256	5.36386	3.23998	4.53923	3.39256	5.36386	927	2989	1396	4568	8.162	22.119	9.59525	39.4614
203	NM_000476,NM_001318121,NM_001318122	AK1	adenylate kinase 1	1.48807	3.72393	-1.09731	3.38058	1.96084	3.90386	1.3177	4.21599	2.15164	3.82727	4.02167	3.44823	3.31426	4.4197	3.44823	4.02167	3.31426	4.4197	1444	2682	1727	3068	9.63191	15.2138	9.0985	20.3582
218	NM_000691,NM_001135167,NM_001135168,NM_001330150	ALDH3A1	aldehyde dehydrogenase 3 family member A1	1.99717	8.54547	-1.19691	7.93033	2.29408	8.63927	1.14866	9.15844	2.74582	8.49917	9.05901	8.06105	7.80173	9.25897	8.06105	9.05901	7.80173	9.25897	31222	73423	31636	70674	271.177	541.208	216.594	608.371
283	NM_001097577,NM_001145	ANG	angiogenin	1.02138	1.39374	2.14719	1.84939	1.3694	1.58924	1.34073	1.60673	-1.56798	2.13201	1.40908	1.37856	2.48102	1.83211	1.37856	1.40908	2.48102	1.83211	121	159	474	211	1.48714	1.67203	4.66478	2.70642
332	NM_001012270,NM_001012271,NM_001168	BIRC5	baculoviral IAP repeat containing 5	-1.84603	5.82028	-1.14087	6.18347	-2.79556	5.48783	-1.51436	5.08669	-2.45037	5.4041	5.39484	6.27927	6.08913	4.79614	6.27927	5.39484	6.08913	4.79614	13555	8410	14555	4634	78.0206	41.1502	66.2122	26.4837
355	NM_000043,NM_001320619,NM_152871,NM_152872,NR_028033,NR_028034,NR_028035,NR_028036,NR_135313,NR_135314,NR_135315	FAS	Fas cell surface death receptor	2.3242	3.3802	-1.06358	2.78132	2.7123	3.47208	1.16698	4.15277	2.88476	3.41701	4.04288	2.82614	2.73721	4.26566	2.82614	4.04288	2.73721	4.26566	1510	4725	1887	4761	5.8145	15.487	5.74829	18.2389
421	NM_001670	ARVCF	armadillo repeat gene deleted in velocardiofacial syndrome	1.68466	1.21178	1.03384	0.916305	2.16116	1.3376	1.28285	1.81588	2.09042	1.3731	1.64507	0.892613	0.940625	2.00442	0.892613	1.64507	0.940625	2.00442	211	673	307	853	0.790413	2.14145	0.906323	3.17638
444	NM_001164750,NM_001164751,NM_001164752,NM_001164753,NM_001164754,NM_001164755,NM_001164756,NM_004318,NM_020164,NM_032466,NM_032467,NM_032468	ASPH	aspartate beta-hydroxylase	-2.23547	7.57622	1.34323	8.38885	-2.26632	7.56554	-1.0138	7.00823	-3.04419	7.75994	7.01812	8.1787	8.6044	6.99835	8.1787	7.01812	8.6044	6.99835	80055	45421	136348	38015	301.442	128.19	376.63	124.163
467	NM_001030287,NM_001040619,NM_001206484,NM_001206486,NM_001206488,NM_001674	ATF3	activating transcription factor 3	1.4382	2.59766	-1.00267	2.34679	2.40186	2.91301	1.67004	3.22176	2.40827	2.91062	2.87299	2.34872	2.34487	3.61287	2.34872	2.87299	2.34487	3.61287	545	1018	723	1569	3.86717	6.31931	4.14923	11.3966
586	NM_001178091,NM_001178092,NM_001178093,NM_001178094,NM_005504	BCAT1	branched chain amino acid transaminase 1	-2.08007	1.08786	1.22088	1.87613	-1.04373	1.70652	1.99291	1.06836	-1.27427	1.84249	0.681048	1.73768	2.0256	1.67593	1.73768	0.681048	2.0256	1.67593	1403	460	2486	1493	2.19197	0.612744	3.09694	2.33273
699	NM_001278616,NM_001278617,NM_004336	BUB1	BUB1 mitotic checkpoint serine/threonine kinase	-1.95559	4.82539	1.01045	5.34088	-3.79157	4.26497	-1.93883	3.85874	-3.83121	4.27096	4.36577	5.33338	5.34838	3.41059	5.33338	4.36577	5.34838	3.41059	9684	5547	12000	2374	40.2763	19.6156	39.4371	9.81726
701	NM_001211	BUB1B	BUB1 mitotic checkpoint serine/threonine kinase B	-1.62119	4.27302	1.03938	4.66352	-2.91707	3.78551	-1.79934	3.48932	-3.03195	3.8082	3.93868	4.63574	4.69147	3.09122	4.63574	3.93868	4.69147	3.09122	5991	4168	7860	1932	24.2104	14.3206	25.0889	7.76414
890	NM_001237	CCNA2	cyclin A2	-1.71575	4.44733	-1.04454	4.82223	-2.99309	3.98524	-1.74448	3.65153	-2.86546	3.95934	4.07492	4.85376	4.79089	3.27213	4.85376	4.07492	4.79089	3.27213	5360	3540	6416	1686	28.2814	15.8822	26.7398	8.84391
891	NM_031966	CCNB1	cyclin B1	-2.026	6.81597	-1.13432	7.25281	-4.32946	6.1977	-2.13695	5.75186	-3.81678	6.12049	6.32566	7.34429	7.16246	5.23011	7.34429	6.32566	7.16246	5.23011	23540	13438	25519	5199	164.276	79.737	140.661	36.0822
899	NM_001323538,NM_001761	CCNF	cyclin F	-1.70268	3.59623	-1.12564	3.91427	-3.16505	3.05854	-1.85886	2.74941	-2.81179	2.99256	3.23276	4.00057	3.82983	2.33834	4.00057	3.23276	3.82983	2.33834	4132	2768	4710	1210	14.804	8.38323	13.33	4.24972
900	NM_004060,NM_199246	CCNG1	cyclin G1	1.85985	5.75319	1.18593	5.44461	2.24154	5.87646	1.20523	6.3514	1.89011	6.01072	6.21817	5.32298	5.56901	6.48748	5.32298	6.21817	5.56901	6.48748	6515	14201	9543	14240	40.0187	74.265	46.3745	86.9764
970	NM_001252,NM_001330332	CD70	CD70 molecule	1.75355	3.77417	-2.13979	2.7885	1.78211	3.78463	1.01629	4.21263	3.81334	3.11245	4.20099	3.39072	2.29325	4.2243	3.39072	4.20099	2.29325	4.2243	641	1500	500	1284	9.24302	17.3727	3.97984	17.7219
983	NM_001170406,NM_001170407,NM_001320918,NM_001786,NM_033379	CDK1	cyclin dependent kinase 1	-1.25265	5.73544	1.00272	5.90219	-2.0346	5.36344	-1.62424	5.21364	-2.04013	5.36522	5.57525	5.90023	5.90415	4.87548	5.90023	5.57525	5.90415	4.87548	7500	6828	9190	3544	59.8943	46.3047	57.8469	28.005
991	NM_001255	CDC20	cell division cycle 20	-2.4373	6.57315	-1.26824	7.07364	-4.55262	6.05588	-1.8679	5.49268	-3.5897	5.9109	5.96185	7.24713	6.9043	5.06044	7.24713	5.96185	6.9043	5.06044	16967	8049	16292	3532	153.275	61.8275	116.249	31.7324
993	NM_001789,NM_201567	CDC25A	cell division cycle 25A	-1.43222	2.7315	-1.32215	2.7942	-2.18727	2.37206	-1.52719	2.15769	-1.65434	2.20721	2.48464	3.00289	2.60001	1.87376	3.00289	2.48464	2.60001	1.87376	1638	1308	1587	691	6.73132	4.56178	5.14556	2.81569
995	NM_001287582,NM_001287583,NM_001318098,NM_001790,NM_022809	CDC25C	cell division cycle 25C	-1.64908	3.15526	1.03254	3.55968	-2.39098	2.83905	-1.44989	2.53288	-2.46879	2.85753	2.81499	3.53665	3.58285	2.27905	3.53665	2.81499	3.58285	2.27905	1461	1003	1979	572	10.3652	6.03283	11.1368	4.02814
1026	NM_000389,NM_001220777,NM_001220778,NM_001291549,NM_078467	CDKN1A	cyclin dependent kinase inhibitor 1A	3.85372	6.95261	-1.13711	5.95385	6.31766	7.25612	1.63936	8.34246	7.18389	7.14404	7.99351	6.04725	5.86188	8.70664	6.04725	7.99351	5.86188	8.70664	9443	43139	10287	60753	66.0196	253.502	56.1342	422.395
1031	NM_001262,NM_078626	CDKN2C	cyclin dependent kinase inhibitor 2C	-1.9095	2.72312	-1.39607	2.97901	-2.26286	2.57377	-1.18505	2.17027	-1.62088	2.37421	2.2962	3.2294	2.74803	2.05125	3.2294	2.2962	2.74803	2.05125	1092	604	946	404	8.08439	3.89715	5.80634	3.30316
1033	NM_001130851,NM_001330173,NM_005192	CDKN3	cyclin dependent kinase inhibitor 3	-1.72068	5.70778	-1.08965	6.05043	-2.28831	5.48311	-1.32989	5.11992	-2.10005	5.42728	5.3297	6.11268	5.98882	4.91839	6.11268	5.3297	5.98882	4.91839	4109	2724	4612	1735	69.2152	39.1042	61.5084	28.8024
1051	NM_001285878,NM_001285879,NM_005194	CEBPB	CCAAT/enhancer binding protein beta	17.6363	2.5613	-1.01181	1.21461	1.33279	1.41525	-13.2326	2.96365	1.34853	1.40541	5.36358	1.22311	1.20617	1.63756	1.22311	5.36358	1.20617	1.63756	173	6585	229	317	1.22826	40.1634	1.28897	2.25196
1058	NM_001042426,NM_001809	CENPA	centromere protein A	-1.92077	4.38784	-1.07201	4.83345	-4.64553	3.60975	-2.41858	3.24312	-4.33346	3.57248	3.94218	4.88387	4.78354	2.66802	4.88387	3.94218	4.78354	2.66802	2714	1577	3136	525	28.8654	14.3644	26.5368	5.54241
1062	NM_001286734,NM_001813	CENPE	centromere protein E	-1.80056	2.68269	1.03919	3.16786	-3.18924	2.14636	-1.77125	1.83362	-3.31423	2.16523	2.2918	3.14025	3.19571	1.46704	3.14025	2.2918	3.19571	1.46704	4169	2531	5812	1040	7.50479	3.87518	8.27358	1.88012
1063	NM_016343	CENPF	centromere protein F	-1.75032	4.55488	1.08473	5.03488	-3.09659	4.08056	-1.76916	3.7348	-3.35896	4.12838	4.16894	4.97656	5.09389	3.34587	4.97656	4.16894	5.09389	3.34587	21145	13596	28544	6387	31.0568	16.9792	33.1147	9.32998
1073	NM_001243645,NM_021914,NM_138638,NR_028130,NR_028131	CFL2	cofilin 2	-2.13688	4.56324	1.08671	5.20339	1.08116	5.19973	2.31031	4.6129	-1.00513	5.26002	4.04824	5.14375	5.26371	5.25633	5.14375	4.04824	5.26371	5.25633	7472	3797	10117	7955	34.8217	15.5569	37.1745	36.8535
1263	NM_004073	PLK3	polo like kinase 3	1.78335	2.78057	-1.21709	2.24823	2.45542	2.97259	1.37685	3.452	2.98847	2.79111	3.22901	2.39441	2.11098	3.69038	2.39441	3.22901	2.11098	3.69038	667	1626	705	2008	4.03876	8.36935	3.37144	12.0906
1316	NM_001160124,NM_001160125,NM_001300,NR_027653	KLF6	Kruppel like factor 6	1.03773	3.81053	-2.26902	3.13769	-1.09416	3.71842	-1.13544	3.74458	2.07375	3.08339	3.83733	3.7839	2.60184	3.65408	3.7839	3.83733	2.60184	3.65408	3829	4803	2004	3634	12.4844	13.3159	5.15727	11.7817
1355	NM_001320974,NM_001320975,NM_001320976,NM_004376,NM_078470	COX15	COX15, cytochrome c oxidase assembly homolog	-1.02731	3.2006	1.93651	3.66596	2.13226	3.72647	2.1905	3.70391	1.10108	4.24244	3.18122	3.22009	4.17355	4.31247	3.22009	3.18122	4.17355	4.31247	2576	3104	7757	6774	8.01602	8.0825	17.1259	18.8779
1397	NM_001270837,NM_001270841,NM_001312,NR_073081,NR_073082,NR_073083,NR_073084,NR_073085	CRIP2	cysteine rich protein 2	1.42575	5.26578	-1.1808	4.89478	1.77315	5.41354	1.24366	5.68297	2.09374	5.28258	5.52785	5.01613	4.77636	5.84244	5.01613	5.52785	4.77636	5.84244	2641	4312	2725	4586	32.0112	45.0616	26.4504	56.1047
1606	NM_001345,NM_001351033,NM_001351034,NM_001351035,NM_001351036,NM_001351037,NM_001351038,NM_001351039,NM_001351040,NM_201444,NM_201445,NM_201554,NR_147026,NR_147027	DGKA	diacylglycerol kinase alpha	2.03007	3.1116	-1.01251	2.63349	2.67536	3.27632	1.31786	3.85797	2.70883	3.26518	3.66401	2.64248	2.62453	4.06221	2.64248	3.66401	2.62453	4.06221	901	2470	1202	2882	5.00169	11.6338	5.25233	15.8691
1643	NM_000107,NM_001300734	DDB2	damage specific DNA binding protein 2	2.14444	6.45004	1.01911	5.93681	2.47344	6.5439	1.15342	7.12599	2.42707	6.55897	7.02377	5.92317	5.95048	7.22969	5.92317	7.02377	5.95048	7.22969	7338	18262	9037	18037	60.817	128.49	59.4908	148.435
1647	NM_001199741,NM_001199742,NM_001924	GADD45A	growth arrest and DNA damage inducible alpha	1.87554	5.06482	-1.05796	4.59062	2.45234	5.23871	1.30754	5.72891	2.59448	5.19253	5.53875	4.63144	4.55015	5.9256	4.63144	5.53875	4.55015	5.9256	2183	4831	2618	5435	24.1344	45.3568	22.6778	59.3807
1649	NM_001195053,NM_001195054,NM_001195055,NM_001195056,NM_001195057,NM_004083	DDIT3	DNA damage inducible transcript 3	-1.08673	3.94712	1.34064	4.21373	1.99951	4.47959	2.17292	4.41202	1.49145	4.71004	3.88758	4.00757	4.43049	5.00721	4.00757	3.88758	4.43049	5.00721	973	1065	1693	2002	14.8816	13.762	20.6179	30.5591
1808	NM_001197293,NM_001244604,NM_001386	DPYSL2	dihydropyrimidinase like 2	-1.93608	4.99082	1.19205	5.61538	1.08899	5.55124	2.10836	5.04641	-1.09465	5.67793	4.53695	5.49009	5.74354	5.61307	5.49009	4.53695	5.74354	5.61307	13049	7824	19005	13726	45.2075	22.0779	52.1459	47.1431
1869	NM_005225	E2F1	E2F transcription factor 1	-1.80716	4.31806	-1.12685	4.67903	-2.0637	4.21105	-1.14195	3.81529	-1.83138	4.13423	3.91224	4.76597	4.59367	3.72074	4.76597	3.91224	4.59367	3.72074	4726	2947	5292	2220	26.4707	14.0308	23.4073	12.361
1870	NM_004091	E2F2	E2F transcription factor 2	-1.8699	1.56703	-1.20701	1.9418	-2.23756	1.38433	-1.19662	1.0418	-1.85381	1.29095	1.17929	2.08226	1.81082	0.920332	2.08226	1.17929	1.81082	0.920332	1047	516	1089	333	3.04747	1.27657	2.50457	0.963711
1894	NM_001258315,NM_001258316,NM_001349094,NM_001349095,NM_001349096,NM_001349097,NM_001349098,NM_001349099,NM_001349100,NM_001349101,NM_001349102,NM_001349103,NM_001349104,NM_018098	ECT2	epithelial cell transforming 2	-1.42762	5.34705	1.16155	5.71702	-2.06809	5.05878	-1.44863	4.82166	-2.40219	5.15528	5.09641	5.61001	5.82607	4.56172	5.61001	5.09641	5.82607	4.56172	13779	10930	19504	6282	49.1083	33.162	54.8005	22.3
1998	NM_001276457,NM_001276458,NM_001276459,NM_001331036,NM_006874,NM_201999	ELF2	E74 like ETS transcription factor 2	-1.93187	2.26247	1.05394	2.82444	-1.98952	2.23619	-1.02984	1.81546	-2.09685	2.2664	1.8368	2.78679	2.86259	1.79437	2.78679	1.8368	2.86259	1.79437	1189	638	1681	559	5.63266	2.57818	6.33508	2.62083
2040	NM_001270526,NM_001270527,NM_004099,NM_198194,NR_073037	STOM	stomatin	5.62024	4.85134	3.56983	4.59036	7.06399	4.97764	1.25688	6.41675	1.9788	6.07155	6.25394	3.76331	5.59917	6.58379	3.76331	6.25394	5.59917	6.58379	2588	19153	12639	20010	12.2965	76.6792	47.2723	94.2141
2182	NM_001318509,NM_001318510,NM_004458,NM_022977	ACSL4	acyl-CoA synthetase long-chain family member 4	1.82375	2.88107	2.41164	3.04964	2.0099	2.9408	1.10207	3.41634	-1.19988	3.61622	3.34695	2.48004	3.75006	3.48717	2.48004	3.34695	3.75006	3.48717	1473	3571	5298	3465	4.34981	9.12953	12.5627	10.368
2232	NM_001258012,NM_001258013,NM_001258014,NM_001258015,NM_001258016,NM_004110,NM_024417,NR_047576	FDXR	ferredoxin reductase	3.95921	6.29608	1.05987	5.42302	5.32752	6.47651	1.3456	7.57755	5.02656	6.5268	7.36645	5.38124	5.46513	7.7947	5.38124	7.36645	5.46513	7.7947	5178	24061	6810	27806	41.5275	163.904	43.0352	221.515
2533	NM_001243093,NM_001349333,NM_001465,NM_199335	FYB	FYN binding protein	-2.08442	2.24319	-1.81034	2.36821	-2.09934	2.23667	-1.00716	1.76993	-1.15964	1.86858	1.77508	2.83473	1.97847	1.76479	2.83473	1.77508	1.97847	1.76479	1908	934	1228	853	5.86507	2.42904	2.95232	2.55141
2593	NM_000156,NM_138924	GAMT	guanidinoacetate N-methyltransferase	1.41264	4.31225	-1.17113	3.95465	1.74544	4.45395	1.23559	4.71877	2.04414	4.32746	4.56863	4.07024	3.84234	4.87383	4.07024	4.56863	3.84234	4.87383	1236	2173	1413	2252	15.6096	22.5225	13.4313	27.9923
2730	NM_001308253,NM_002061	GCLM	glutamate-cysteine ligase modifier subunit	1.8945	4.36236	1.08768	3.9859	-1.16478	3.81411	-2.20668	4.23833	-1.26691	3.87257	4.84755	3.92573	4.04699	3.70567	3.92573	4.84755	4.04699	3.70567	4660	10884	6542	4086	14.0113	27.7338	15.5254	12.2164
2876	NM_000581,NM_001329455,NM_001329502,NM_001329503,NM_201397	GPX1	glutathione peroxidase 1	1.57005	7.273	-1.00505	6.95123	2.04546	7.45323	1.3028	7.79415	2.0558	7.44933	7.60568	6.95487	6.9476	7.9873	6.95487	7.60568	6.9476	7.9873	9766	17666	11620	19444	127.819	197.046	120.439	253.582
2905	NM_000835,NM_001278553,NR_103735	GRIN2C	glutamate ionotropic receptor NMDA type subunit 2C	1.5416	0.965347	-1.12779	0.609475	4.47356	1.41825	2.9019	1.94927	5.04524	1.23068	1.32679	0.702368	0.528867	2.86379	0.702368	1.32679	0.528867	2.86379	133	497	153	1532	0.575662	1.51611	0.433048	6.50325
2957	NM_001278940,NM_015859,NM_201595	GTF2A1	general transcription factor IIA subunit 1	-1.13068	1.72863	1.09069	1.88108	2.50187	2.39119	2.82882	2.27178	2.29384	2.47212	1.64231	1.8195	1.94474	3.14251	1.8195	1.64231	1.94474	3.14251	989	1041	1472	3350	2.37698	2.13343	2.85442	8.05118
2970	NR_002206,NR_002206_dup1	GTF2IP1	general transcription factor IIi pseudogene 1	-1.00532	3.75664	1.05098	3.79616	2.06128	4.25033	2.07224	4.246	1.9613	4.29068	3.75282	3.76046	3.8322	4.80401	3.76046	3.75282	3.8322	4.80401	2949	3520	4056	6426	12.2808	12.4646	13.3428	26.6165
3014	NM_002105	H2AFX	H2A histone family member X	-1.43458	5.95217	-1.18955	6.09168	-2.498	5.51841	-1.74128	5.28234	-2.09996	5.40615	5.69754	6.21817	5.96776	4.89739	6.21817	5.69754	5.96776	4.89739	7881	6324	8045	3008	74.8135	51.041	60.3179	28.3999
3148	NM_001130688,NM_001130689,NM_002129	HMGB2	high mobility group box 2	1.06296	5.45407	1.52921	5.70838	-1.39996	5.16181	-1.48809	5.20366	-2.14083	5.4463	5.49829	5.41021	6.02299	4.92483	5.41021	5.49829	6.02299	4.92483	4234	5197	8043	2877	42.4081	44.1759	63.2962	28.9014
3161	NM_001142556,NM_001142557,NM_012484,NM_012485	HMMR	hyaluronan mediated motility receptor	-1.84542	4.33469	1.12121	4.88097	-3.70348	3.73721	-2.00684	3.37553	-4.15237	3.80094	3.91519	4.79914	4.9642	2.91026	4.79914	3.91519	4.9642	2.91026	5603	3419	7906	1404	27.122	14.0456	30.1802	6.74702
3200	NM_030661,NM_153631	HOXA3	homeobox A3	-2.43376	1.69349	-2.26008	1.76914	-2.63848	1.6069	-1.08412	1.10957	-1.16743	1.15914	1.16936	2.45255	1.27617	1.05284	2.45255	1.16936	1.27617	1.05284	934	327	391	260	4.23308	1.26389	1.40985	1.16753
3229	NM_017410	HOXC13	homeobox C13	1.72372	1.88601	1.16702	1.64135	2.43715	2.07927	1.41389	2.55689	2.08836	2.2252	2.31924	1.53371	1.75654	2.8189	1.53371	2.31924	1.75654	2.8189	283	741	474	1000	1.78285	3.97437	2.36159	6.27409
3486	NM_000598,NM_001013398	IGFBP3	insulin like growth factor binding protein 3	1.11144	7.32173	-4.00521	6.16424	1.04872	7.28015	-1.0598	7.35633	4.20036	6.19336	7.39834	7.24591	5.24404	7.31455	7.24591	7.39834	5.24404	7.31455	26499	34243	8064	27463	153.189	168.254	36.8225	157.908
3569	NM_000600,NM_001318095	IL6	interleukin 6	1.94442	2.30068	1.25443	2.02741	2.2653	2.38858	1.16503	2.93794	1.80585	2.58897	2.82982	1.87048	2.1975	3.05018	1.87048	2.82982	2.1975	3.05018	197	563	363	588	2.49634	6.09658	3.66292	7.5111
3589	NM_000641,NM_001267718	IL11	interleukin 11	-1.74888	5.05479	-1.05823	5.43308	-3.00316	4.61312	-1.71719	4.25979	-2.83791	4.57858	4.66763	5.47406	5.39241	3.88758	5.47406	4.66763	5.39241	3.88758	6996	4467	8113	2203	44.6174	24.2027	40.8085	13.9824
3619	NM_001040694,NM_020238	INCENP	inner centromere protein	-1.59488	4.20434	-1.15351	4.45033	-2.56177	3.8161	-1.60624	3.52269	-2.22085	3.72879	3.88108	4.55453	4.3485	3.19739	4.55453	3.88108	4.3485	3.19739	6219	4411	6738	2316	22.7167	13.703	19.4416	8.41562
3625	NM_002193	INHBB	inhibin beta B subunit	-1.37942	4.30769	-1.22303	4.39833	-2.21192	3.93183	-1.60352	3.72575	-1.80855	3.80415	4.08191	4.54596	4.2555	3.40066	4.54596	4.08191	4.2555	3.40066	4781	3983	4884	2082	22.5554	15.9765	18.1996	9.76634
3628	NM_001128928,NM_002194	INPP1	inositol polyphosphate-1-phosphatase	1.33421	2.86416	-1.05498	2.62482	2.07022	3.1451	1.55164	3.38178	2.18404	3.09918	3.0797	2.66371	2.58649	3.71349	2.66371	3.0797	2.58649	3.71349	682	1197	863	1681	5.08766	7.45677	5.08722	12.2934
3705	NM_001142593,NM_001142594,NM_014216	ITPK1	inositol-tetrakisphosphate 1-kinase	-2.25141	3.94886	-1.04817	4.54337	-1.06755	4.53004	2.10895	3.90798	-1.01849	4.49633	3.40661	4.57744	4.50956	4.48313	4.57744	3.40661	4.50956	4.48313	5144	2482	6186	4736	23.1261	9.57595	21.9415	21.168
3732	NM_001024844,NM_002231	CD82	CD82 molecule	1.70711	2.90864	-1.15535	2.44195	2.10446	3.03801	1.23276	3.46755	2.43139	2.91118	3.31989	2.54833	2.34	3.62178	2.54833	3.31989	2.34	3.62178	518	1178	586	1292	4.62843	8.96315	4.1387	11.4979
3832	NM_004523	KIF11	kinesin family member 11	-1.52647	4.77072	1.01181	5.09403	-2.40273	4.4081	-1.57404	4.1352	-2.43112	4.41544	4.47536	5.08557	5.10251	3.82089	5.08557	4.47536	5.10251	3.82089	11283	8359	14169	4475	33.6015	21.1667	33.3272	13.2524
3833	NM_002263	KIFC1	kinesin family member C1	-1.63026	4.494	-1.22788	4.70994	-3.01315	3.98609	-1.84826	3.68563	-2.45394	3.86273	4.15525	4.86035	4.56418	3.26908	4.86035	4.15525	4.56418	3.26908	5085	3534	5197	1588	28.4392	16.8035	22.9567	8.83089
3835	NM_001256269,NM_001256270,NM_007317	KIF22	kinesin family member 22	-1.43553	5.53996	-1.15125	5.70438	-2.121	5.2365	-1.47751	4.99579	-1.84234	5.14406	5.28531	5.80689	5.60368	4.72214	5.80689	5.28531	5.60368	4.72214	7816	6255	8419	3536	55.6927	37.9199	47.3581	25.0405
3838	NM_001320611,NM_002266	KPNA2	karyopherin subunit alpha 2	-1.80102	8.34315	-1.05899	8.7369	-2.86744	7.98237	-1.59212	7.58664	-2.70772	7.94469	7.92953	8.77834	8.69566	7.25858	8.77834	7.92953	8.69566	7.25858	61144	40480	70987	21312	436.744	246.049	400.433	151.542
4001	NM_001198557,NM_005573,NR_134488	LMNB1	lamin B1	-1.55627	4.88718	-1.19903	5.08401	-2.58164	4.48056	-1.65886	4.19759	-2.15311	4.36665	4.57854	5.21663	4.95477	3.84835	5.21663	4.57854	4.95477	3.84835	8334	4759	8557	3069	36.6588	22.679	30.0028	13.5608
4085	NM_002358	MAD2L1	mitotic arrest deficient 2 like 1	-1.46374	5.05637	1.00519	5.3424	-2.10872	4.77022	-1.44063	4.51798	-2.11967	4.77356	4.789	5.33867	5.34614	4.2623	5.33867	4.789	5.34614	4.2623	3835	2977	4736	1738	40.3822	26.6574	39.3934	18.1967
4092	NM_001190821,NM_001190822,NM_001190823,NM_005904	SMAD7	SMAD family member 7	-2.56867	2.88908	-1.099	3.57991	-1.06919	3.60007	2.40245	2.85061	1.02789	3.53224	2.28763	3.64865	3.51246	3.55214	3.64865	2.28763	3.51246	3.55214	2201	872	2607	2169	11.3007	3.86184	10.5454	10.8748
4175	NM_005915	MCM6	minichromosome maintenance complex component 6	-1.85954	5.21836	-1.07436	5.63301	-2.22731	5.07456	-1.19778	4.65804	-2.07315	5.02816	4.79004	5.68499	5.5815	4.52968	5.68499	4.79004	5.5815	4.52968	12857	7852	14839	5498	51.3392	26.6612	46.8015	21.8347
4193	NM_001145337,NM_001145339,NM_001145340,NM_001278462,NM_002392	MDM2	MDM2 proto-oncogene	2.86158	5.15847	1.09249	4.51888	5.29949	5.5291	1.85195	6.40143	4.85084	5.60773	5.97233	4.45552	4.58313	6.86137	4.45552	5.97233	4.58313	6.86137	10332	36031	14448	56489	21.0637	62.3235	23.2055	114.71
4209	NM_001271629,NM_005920	MEF2D	myocyte enhancer factor 2D	-2.00489	3.47453	1.03863	4.03958	1.25566	4.17333	2.51747	3.61395	1.20897	4.20167	3.00881	4.01234	4.06701	4.34079	4.01234	3.00881	4.06701	4.34079	5838	3216	7796	7580	14.931	7.05714	15.7598	19.289
4254	NM_000899,NM_003994	KITLG	KIT ligand	1.60057	2.15516	1.08334	1.89928	2.00909	2.29106	1.25523	2.67997	1.85453	2.36177	2.521	1.84241	1.9579	2.84895	1.84241	2.521	1.9579	2.84895	872	1979	1316	2315	2.43025	4.68839	2.89308	6.4186
4288	NM_001145966,NM_002417	MKI67	marker of proliferation Ki-67	-1.91541	5.27099	-1.18652	5.63591	-3.52155	4.76679	-1.83853	4.36163	-2.96797	4.66359	4.82297	5.76062	5.51389	3.94441	5.76062	4.82297	5.51389	3.94441	43555	25969	45761	11881	53.7035	27.3103	44.673	14.5407
4698	NM_001282419,NM_001282420,NM_001282421,NM_001282422,NM_001291304,NM_005000,NR_104168,NR_104169,NR_111925,NR_111926	NDUFA5	NADH:ubiquinone oxidoreductase subunit A5	1.09351	3.02897	-2.02137	2.4045	1.17915	3.08175	1.07832	3.14806	2.3835	2.49904	3.09414	2.96517	1.94984	3.20292	2.96517	3.09414	1.94984	3.20292	2419	3291	1350	3149	6.52112	7.5416	2.86889	8.43799
4747	NM_006158	NEFL	neurofilament light	1.70027	4.28132	-1.00336	3.9131	2.19249	4.44589	1.28949	4.86123	2.19987	4.44313	4.68128	3.91552	3.91067	5.04809	3.91552	4.68128	3.91067	5.04809	3534	7290	4530	8043	13.9176	24.4087	14.0908	31.4994
4751	NM_001204182,NM_001204183,NM_002497	NEK2	NIMA related kinase 2	-1.91844	4.30901	1.07118	4.85388	-3.44168	3.81005	-1.794	3.4171	-3.68666	3.84918	3.86459	4.80453	4.90373	3.02142	4.80453	3.86459	4.90373	3.02142	3820	2226	5135	1040	27.1763	13.5636	28.9317	7.3371
4782	NM_001245002,NM_001245004,NM_001245005,NM_005597,NM_205843	NFIC	nuclear factor I C	-1.16789	3.41965	-1.78446	3.08756	-2.17418	2.91994	-1.86163	2.82591	-1.2184	2.55148	3.30953	3.53344	2.69795	2.41296	3.53344	3.30953	2.69795	2.41296	5415	5475	3703	2387	10.3369	8.88799	5.57557	4.52398
4814	NM_004148	NINJ1	ninjurin 1	1.90551	5.40235	-1.12568	4.8711	2.39271	5.55101	1.25568	6.04943	2.69343	5.45454	5.88742	4.95724	4.78645	6.21589	4.95724	5.88742	4.78645	6.21589	2588	5841	2853	6177	30.5454	58.633	26.601	72.5224
4899	NM_001040110,NM_001293163,NM_001293164,NM_005011	NRF1	nuclear respiratory factor 1	-1.50344	2.79317	-1.20563	2.96479	-2.12297	2.50144	-1.41208	2.25186	-1.76088	2.39022	2.51449	3.10275	2.83297	2.01667	3.10275	2.51449	2.83297	2.01667	1703	1285	1847	756	7.2903	4.67019	6.20544	3.2089
5111	NM_002592,NM_182649	PCNA	proliferating cell nuclear antigen	1.3738	8.42962	-1.22387	8.0566	1.80921	8.62073	1.31695	8.85819	2.21425	8.4662	8.66181	8.20365	7.91219	9.05901	8.20365	8.66181	7.91219	9.05901	26760	42353	25775	47675	305.277	410.931	232.06	540.44
5176	NM_001329903,NM_001329904,NM_001329905,NM_002615	SERPINF1	serpin family F member 1	2.3577	1.15389	1.29306	0.856148	2.5095	1.18052	1.06439	1.97247	1.94075	1.46352	1.92797	0.690596	1.06139	2.018	0.690596	1.92797	1.06139	2.018	58	338	138	328	0.562762	2.80641	1.06767	3.21404
5228	NM_001207012,NM_001293643,NM_002632	PGF	placental growth factor	2.76935	1.30658	1.04412	0.794775	4.81308	1.52203	1.73798	2.60213	4.60972	1.58284	2.23379	0.764244	0.826526	3.03121	0.764244	2.23379	0.826526	3.03121	83	542	121	931	0.648412	3.69676	0.766061	7.40864
5347	NM_005030	PLK1	polo like kinase 1	-2.8036	5.96455	-1.28006	6.57386	-10.0321	4.81173	-3.5783	4.24907	-7.83727	4.68313	5.26709	6.75437	6.39816	3.42781	6.75437	5.26709	6.39816	3.42781	16167	6615	15567	1506	107.372	37.3547	81.6595	9.94519
5365	NM_001163257,NM_005393	PLXNB3	plexin B3	2.57444	1.76264	1.01141	1.21605	4.71228	2.0397	1.83041	2.97646	4.6591	2.05348	2.57215	1.20789	1.22427	3.44432	1.20789	2.57215	1.22427	3.44432	496	2356	686	4163	1.20574	4.87567	1.31678	10.0755
5366	NM_021127	PMAIP1	phorbol-12-myristate-13-acetate-induced protein 1	1.41968	2.87334	1.10228	2.70098	2.30999	3.17873	1.62712	3.47066	2.09565	3.26247	3.13722	2.63165	2.77214	3.83954	2.63165	3.13722	2.77214	3.83954	635	1178	961	1736	4.95324	7.82131	5.92605	13.4809
5413	NM_001009939,NM_002688	SEPT5	septin 5	1.39308	3.07266	-1.20846	2.70278	1.81448	3.24425	1.3025	3.50655	2.19272	3.08444	3.32109	2.84281	2.56965	3.70237	2.84281	3.32109	2.56965	3.70237	826	1492	892	1746	5.8993	8.96496	5.02188	12.1905
5429	NM_001291969,NM_001291970,NM_006502	POLH	DNA polymerase eta	1.8906	2.57368	-1.17101	2.03788	2.40923	2.71615	1.27432	3.24394	2.82124	2.56861	3.07378	2.15494	1.92718	3.42351	2.15494	3.07378	1.92718	3.42351	1807	4855	1980	5542	3.24865	7.43234	2.81508	9.91725
5507	NM_005398	PPP1R3C	protein phosphatase 1 regulatory subunit 3C	1.52461	3.32068	-1.14268	2.93257	1.96956	3.48517	1.29185	3.81906	2.25058	3.37271	3.6388	3.03036	2.83794	4.00824	3.03036	3.6388	2.83794	4.00824	1171	2280	1344	2613	6.88239	11.3958	6.2413	15.2745
5522	NM_001206994,NM_001206995,NM_001206996,NM_020416,NM_181876	PPP2R2C	protein phosphatase 2 regulatory subunit Bgamma	2.1322	3.39833	2.51704	3.49884	-1.09859	2.82713	-2.34242	3.31777	-2.76521	3.4159	3.98811	2.89577	4.2275	2.76011	2.89577	3.98811	4.2275	2.76011	1802	5115	6619	1721	6.16296	14.8345	17.8318	5.95999
5564	NM_006253	PRKAB1	protein kinase AMP-activated non-catalytic subunit beta 1	1.39312	4.28666	1.02307	4.07059	2.10234	4.55876	1.50909	4.82019	2.05494	4.57723	4.53248	4.05417	4.08707	5.12617	4.05417	4.53248	4.08707	5.12617	2449	4110	3221	5368	15.4218	22.0084	16.0228	33.6201
5625	NM_001195226,NM_016335	PRODH	proline dehydrogenase 1	1.95993	1.17269	1.14732	0.877332	3.17	1.38525	1.61741	2.0726	2.76297	1.55059	1.75458	0.783782	0.982048	2.44827	0.783782	1.75458	0.982048	2.44827	107	447	194	745	0.669226	2.38456	0.959156	4.65222
5824	NM_001193644,NM_002857,NR_036492,NR_036493	PEX19	peroxisomal biogenesis factor 19	-2.30108	3.3191	-1.00149	3.97318	1.10892	4.04814	2.5517	3.38081	1.11056	4.04705	2.77195	3.97426	3.97211	4.12341	3.97426	2.77195	3.97211	4.12341	3512	1640	4525	4033	14.5	5.82043	14.7619	16.5678
5875	NM_004581,NM_182836	RABGGTA	Rab geranylgeranyltransferase alpha subunit	1.52272	3.58996	-1.16667	3.18629	1.77483	3.69014	1.16557	4.01507	2.07063	3.5636	3.90608	3.29943	3.07704	4.12711	3.29943	3.90608	3.07704	4.12711	1196	2319	1302	2402	8.56067	13.9532	7.4978	16.6073
5900	NM_001042368,NM_001271774,NM_001271775,NM_001271776,NM_006266	RALGDS	ral guanine nucleotide dissociation stimulator	1.3581	2.9589	-1.04832	2.71207	1.92669	3.18444	1.41866	3.43092	2.01979	3.14472	3.18792	2.74633	2.67824	3.69245	2.74633	3.18792	2.67824	3.69245	1331	2330	1699	2965	5.44849	8.12432	5.49361	12.1128
5905	NM_001278651,NM_001317930,NM_002883	RANGAP1	Ran GTPase activating protein 1	-1.21992	5.35373	-1.15294	5.39541	-2.03122	4.96161	-1.66505	4.8305	-1.76178	4.8681	5.21226	5.49905	5.29373	4.4767	5.49905	5.21226	5.29373	4.4767	11785	11013	12555	5505	45.5033	36.0463	38.0658	21.0832
5912	NM_002886	RAP2B	RAP2B, member of RAS oncogene family	1.39282	2.66793	-1.08139	2.3825	1.88096	2.85925	1.35047	3.12684	2.03405	2.79231	2.91761	2.43961	2.32672	3.35108	2.43961	2.91761	2.32672	3.35108	2333	4275	2889	5234	4.1921	6.53344	4.10098	9.35659
6236	NM_001128850,NM_004165	RRAD	RRAD, Ras related glycolysis inhibitor and calcium channel regulator	1.83808	1.58709	-1.29443	1.00434	2.6812	1.7823	1.45869	2.34237	3.47063	1.4823	2.08581	1.20761	0.835291	2.63049	1.20761	2.08581	0.835291	2.63049	118	371	97	526	1.20554	3.24322	0.776219	5.37606
6342	NM_001007098,NM_001007099,NM_001007100,NM_001007250,NM_001193599,NM_001193600,NM_001193617,NM_001330587,NM_002979	SCP2	sterol carrier protein 2	1.90763	4.52161	1.82524	4.49278	2.02434	4.56009	1.06118	5.05409	1.10908	5.02186	5.01144	4.07965	4.94774	5.0971	4.07965	5.01144	4.94774	5.0971	2562	4008	4187	3586	15.7177	31.1503	29.8681	32.6804
6388	NM_006923,NR_045585	SDF2	stromal cell derived factor 2	2.4345	4.51158	-1.02605	3.8966	2.51896	4.53288	1.0347	5.22336	2.58457	4.51135	5.19881	3.91519	3.87809	5.24802	3.91519	5.19881	3.87809	5.24802	1387	4191	1739	3696	13.9166	35.7259	13.7379	36.5745
6491	NM_001048166,NM_001282936,NM_001282937,NM_001282938,NM_001282939,NM_003035	STIL	SCL/TAL1 interrupting locus	-1.4781	3.08437	-1.11651	3.29863	-2.01378	2.82943	-1.36241	2.58265	-1.80363	2.76207	2.81535	3.37909	3.22009	2.36919	3.37909	2.81535	3.22009	2.36919	3044	2359	3539	1455	9.16323	6.03399	8.41228	4.35063
6606	NM_000344,NM_000344_dup1,NM_001297715,NM_001297715_dup1,NM_022874,NM_022874_dup1	SMN1	survival of motor neuron 1, telomeric	3.09087	4.14562	-1.09889	3.34206	-1.21304	3.26849	-3.74936	3.97268	-1.10388	3.20264	5.03878	3.41077	3.27472	3.13214	3.41077	5.03878	3.27472	3.13214	985	3966	1169	846	9.38987	31.7099	8.77995	7.9952
6607	NM_017411,NM_017411_dup1,NM_022875,NM_022875_dup1,NM_022876,NM_022876_dup1,NM_022877,NM_022877_dup1	SMN2	survival of motor neuron 2, centromeric	-10.5563	2.71798	-1.13755	4.812	-1.13315	4.81485	9.31588	2.66756	1.00388	4.72273	1.50583	4.90586	4.71993	4.72553	4.90586	1.50583	4.71993	4.72553	3126	226	3444	2694	29.3714	1.85135	25.5207	25.1091
6638	NM_001349454,NM_001349455,NM_001349456,NM_001349457,NM_001349458,NM_001349459,NM_001349460,NM_001349461,NM_001349462,NM_001349463,NM_001349464,NM_001349465,NM_003097,NM_022805,NM_022806,NM_022807,NM_022808	SNRPN	small nuclear ribonucleoprotein polypeptide N	-1.69518	4.70447	-1.01189	5.09203	1.19555	5.22782	2.02667	4.82184	1.20977	5.21907	4.33913	5.10056	5.0835	5.35824	5.10056	4.33913	5.0835	5.35824	3816	2577	4721	4453	33.9361	19.2867	32.9137	39.3798
6747	NM_001308197,NM_001308204,NM_001308205,NM_007107	SSR3	signal sequence receptor subunit 3	2.85696	4.75345	1.08752	4.11623	-1.03067	4.0343	-2.94459	4.72784	-1.12088	4.09405	5.57063	4.05615	4.17719	4.01256	4.05615	5.57063	4.17719	4.01256	4427	15517	6217	4415	15.4471	46.2311	17.1754	15.3233
6790	NM_001323303,NM_001323304,NM_001323305,NM_003600,NM_198433,NM_198434,NM_198435,NM_198436,NM_198437	AURKA	aurora kinase A	-1.89284	6.04462	-1.08394	6.46399	-3.72861	5.49163	-1.96985	5.08936	-3.43987	5.44246	5.60184	6.5224	6.40611	4.62376	6.5224	5.60184	6.40611	4.62376	14323	8496	15907	3547	93.174	47.3619	82.0825	23.3026
6844	NM_001330125,NM_014232	VAMP2	vesicle associated membrane protein 2	1.00147	4.18962	1.04087	4.21736	-3.12632	3.26437	-3.13091	3.26519	-3.25411	3.28681	4.19068	4.18856	4.24636	2.5441	4.18856	4.19068	4.24636	2.5441	2457	2892	3318	740	17.107	17.2184	18.105	5.05
6890	NM_000593,NM_001292022	TAP1	transporter 1, ATP binding cassette subfamily B member	1.56519	4.88415	-1.13816	4.47734	1.84723	4.99476	1.18019	5.33617	2.10243	4.89171	5.218	4.57166	4.38496	5.45702	4.57166	5.218	4.38496	5.45702	4497	8303	4896	8216	23.0368	36.2192	19.9936	41.9948
6917	NM_006756,NM_201437,NR_109901,NR_109902	TCEA1	transcription elongation factor A1	1.85585	5.48409	2.31759	5.62991	1.09416	5.12066	-1.69614	5.55405	-2.11814	5.70173	5.94824	5.05615	6.26878	5.18598	5.05615	5.94824	6.26878	5.18598	6021	13166	17525	6423	32.9333	61.2838	74.6664	34.9357
6940	NM_001324339,NM_005649	ZNF354A	zinc finger protein 354A	-1.16279	2.9496	-3.42327	1.9831	-1.11982	2.97765	1.03837	2.86985	3.05698	1.92948	2.84281	3.0604	1.28503	2.89714	3.0604	2.84281	1.28503	2.89714	1183	1223	302	1131	7.04175	6.17878	1.4241	6.66822
7108	NM_001277233,NM_003273,NR_102367	TM7SF2	transmembrane 7 superfamily member 2	1.8851	2.97413	1.19152	2.67519	2.98926	3.24696	1.58573	3.7844	2.50878	3.40401	3.46641	2.55177	2.80457	4.13156	2.55177	3.46641	2.80457	4.13156	486	1238	809	1747	4.63692	10.0207	6.07125	16.6514
7153	NM_001067	TOP2A	topoisomerase (DNA) II alpha	-1.49123	7.03849	1.12531	7.41731	-2.20649	6.73762	-1.47964	6.46734	-2.48299	6.81543	6.75613	7.33264	7.50297	6.19089	7.33264	6.75613	7.50297	6.19089	61771	48528	85756	27168	162.377	108.467	178.051	71.0261
7170	NM_001043351,NM_001043352,NM_001043353,NM_001278188,NM_001278189,NM_001278190,NM_001278191,NM_001349679,NM_152263,NM_153649,NR_103460,NR_103461	TPM3	tropomyosin 3	-1.08284	7.41198	-1.03803	7.44263	-3.06698	6.61196	-2.83235	6.56095	-2.95461	6.58808	7.35479	7.46961	7.41576	5.85279	7.46961	7.35479	7.41576	5.85279	38666	41056	45553	12725	180.47	162.736	167.5	56.5308
7272	NM_001166691,NM_003318	TTK	TTK protein kinase	-1.54808	3.65056	1.00607	3.98374	-2.6102	3.21363	-1.68608	2.94808	-2.62603	3.21715	3.3489	3.97938	3.98811	2.59522	3.97938	3.3489	3.98811	2.59522	2902	2143	3762	1051	14.5718	9.14693	14.925	5.24394
7277	NM_001278552,NM_006000	TUBA4A	tubulin alpha 4a	1.08557	5.88728	2.51113	6.45846	-1.07255	5.77761	-1.16433	5.83603	-2.6933	6.40224	5.94681	5.82836	7.15669	5.72731	5.82836	5.94681	7.15669	5.72731	7823	9936	24532	7149	56.4733	61.2203	140.373	51.5266
7327	NM_001202489,NM_003343,NM_182688	UBE2G2	ubiquitin conjugating enzyme E2 G2	-4.05143	3.24766	1.04081	4.43884	1.02069	4.42482	4.13526	3.25852	-1.01971	4.45368	2.39164	4.41008	4.46778	4.43962	4.41008	2.39164	4.46778	4.43962	4553	1120	6004	4643	20.213	4.22484	21.2016	20.6347
7341	NM_001005781,NM_001005782,NM_003352	SUMO1	small ubiquitin-like modifier 1	2.34496	5.88218	2.51882	5.92848	2.34954	5.88345	1.00196	6.53041	-1.07205	6.58181	6.529	5.29944	6.63219	6.53182	5.29944	6.529	6.63219	6.53182	3666	10768	12304	9040	39.2641	91.7119	97.4109	90.4916
7351	NM_003355	UCP2	uncoupling protein 2	1.49233	6.03376	-1.31396	5.55143	1.587	6.07591	1.06344	6.37366	2.08526	5.86416	6.32945	5.75188	5.35796	6.41819	5.75188	6.32945	5.35796	6.41819	5810	10223	5485	9179	53.3787	79.8601	39.7988	83.869
7355	NM_001032289,NM_001042498,NM_001282647,NM_001282648,NM_001282649,NM_001282650,NM_001282651,NM_005660	SLC35A2	solute carrier family 35 member A2	2.00402	3.83533	1.55573	3.6715	2.0555	3.85135	1.02569	4.38767	1.32124	4.20025	4.36942	3.36652	4.00411	4.40601	3.36652	4.36942	4.00411	4.40601	1118	3559	2947	3089	9.06298	19.6752	15.1169	20.1712
7374	NM_003362,NM_080911	UNG	uracil DNA glycosylase	-1.9104	5.17788	-1.13149	5.576	-2.10511	5.1007	-1.10192	4.66142	-1.86048	5.01983	4.73195	5.66583	5.4876	4.59193	5.66583	4.73195	5.4876	4.59193	6927	4085	7572	3145	50.6999	25.3909	43.7183	22.8347
7465	NM_001143976,NM_003390	WEE1	WEE1 G2 checkpoint kinase	-1.56068	3.15787	-1.11698	3.4145	-2.14685	2.89208	-1.37559	2.61293	-1.92201	2.82528	2.85306	3.49523	3.33563	2.39301	3.49523	2.85306	3.33563	2.39301	2217	1627	2599	991	10.0046	6.22339	9.24431	4.43921
7508	NM_004628,NR_027299	XPC	XPC complex subunit, DNA damage recognition and repair factor	1.5628	4.65566	1.13231	4.43344	3.20045	5.11549	2.04789	5.48159	2.82649	5.21995	4.98885	4.34472	4.52398	6.02299	4.34472	4.98885	4.52398	6.02299	4721	8886	6938	15692	19.2035	30.763	22.287	63.4819
7633	NM_001286696,NM_001286697,NM_001286698,NM_001322260,NM_007135	ZNF79	zinc finger protein 79	1.63635	2.13466	1.04909	1.84302	2.27201	2.32663	1.38846	2.74582	2.16569	2.37068	2.51926	1.80878	1.87792	2.99275	1.80878	2.51926	1.87792	2.99275	334	782	488	1032	2.35331	4.68555	2.67813	7.1897
7763	NM_001102420,NM_001102421,NM_001278243,NM_001278244,NM_001278245,NM_006007	ZFAND5	zinc finger AN1-type containing 5	-2.15639	4.28982	1.02171	4.89526	-2.08225	4.31843	1.0356	3.79632	-2.12745	4.33212	3.77117	4.87979	4.91077	3.82164	4.87979	3.77117	4.91077	3.82164	11013	5604	14100	5063	28.7739	12.6284	29.0669	13.262
7832	NM_006763	BTG2	BTG anti-proliferation factor 2	3.0714	3.46537	-1.02778	2.72937	5.43346	3.77774	1.76905	4.76184	5.58442	3.75048	4.3681	2.74921	2.70967	5.19108	2.74921	4.3681	2.70967	5.19108	980	4144	1275	6316	5.46653	19.6529	5.61601	35.0374
7884	NM_001306074,NM_001306075,NM_006527	SLBP	stem-loop binding protein	-1.49655	4.82328	-1.07007	5.07377	-2.87839	4.29302	-1.92335	4.04197	-2.68991	4.25188	4.54122	5.12286	5.02516	3.5976	5.12286	4.54122	5.02516	3.5976	5039	3840	5901	1669	34.3397	22.1523	31.6785	11.2747
8334	NM_003512	HIST1H2AC	histone cluster 1 H2A family member c	-1.28269	2.48195	1.28727	2.84436	1.60393	2.98946	2.05734	2.78097	1.24599	3.18704	2.30885	2.66802	3.03234	3.34963	2.66802	2.30885	3.03234	3.34963	185	168	331	340	5.10645	3.93863	7.23944	9.35044
8493	NM_003620	PPM1D	protein phosphatase, Mg2+/Mn2+ dependent 1D	2.35405	2.90483	1.12844	2.43778	3.42309	3.11586	1.45413	3.84793	3.03348	3.22926	3.58732	2.35218	2.5265	4.12748	2.35218	3.58732	2.5265	4.12748	1228	4088	1940	5275	3.88678	11.003	4.84887	16.6079
8609	NM_001270942,NM_001270943,NM_001270944,NM_003709,NR_073108	KLF7	Kruppel like factor 7	-1.1001	2.73517	-2.47625	2.0489	-3.23575	1.76508	-2.94133	1.72123	-1.30671	1.28936	2.66722	2.80485	1.49669	1.11075	2.80485	2.66722	1.49669	1.11075	3082	3469	1256	693	5.69819	5.33319	1.8045	1.26149
8663	NM_001037808,NM_001037808_dup1,NM_001199142,NM_001199142_dup1,NM_001267574,NM_001267574_dup1,NM_001286478,NM_001286478_dup1,NM_003752,NM_003752_dup1	EIF3C	eukaryotic translation initiation factor 3 subunit C	2.0482	6.56151	2.08976	6.57488	-1.08238	6.00731	-2.21692	6.49943	-2.2619	6.51269	7.09904	6.06468	7.12801	5.95048	6.06468	7.09904	7.12801	5.95048	13926	33500	35614	12700	66.961	138.15	136.937	60.4503
8732	NM_001286426,NM_001286428,NM_003800	RNGTT	RNA guanylyltransferase and 5'-phosphatase	-2.07151	2.46356	-1.74031	2.61425	-1.19115	2.91539	1.73908	2.35925	1.46103	2.50355	1.99361	3.04429	2.24495	2.79194	3.04429	1.99361	2.24495	2.79194	2219	1111	1534	1970	6.95262	2.97781	3.81666	6.12423
8744	NM_003811	TNFSF9	TNF superfamily member 9	2.03134	3.38133	-1.07186	2.85805	2.23493	3.44009	1.10022	3.99928	2.39553	3.38036	3.93098	2.90854	2.80843	4.06877	2.90854	3.93098	2.80843	4.06877	687	1843	849	1763	6.23543	14.2324	6.08426	15.9201
8793	NM_003840	TNFRSF10D	TNF receptor superfamily member 10d	1.51788	4.10674	-1.18721	3.69086	1.70577	4.18424	1.12379	4.50218	2.02511	4.04626	4.41878	3.81672	3.56915	4.58715	3.81672	4.41878	3.56915	4.58715	2996	5601	3266	5342	12.8059	20.3551	11.0251	22.7074
8795	NM_003842,NM_147187,NR_027140	TNFRSF10B	TNF receptor superfamily member 10b	1.64232	6.31787	1.00291	5.97222	2.19352	6.51215	1.33562	6.89146	2.18716	6.51444	6.68586	5.97013	5.97432	7.10338	5.97013	6.68586	5.97432	7.10338	17112	32625	20844	36436	62.8835	101.983	60.5913	133.17
8816	NM_001284206,NM_001284207,NM_001284208,NM_003861	DCAF5	DDB1 and CUL4 associated factor 5	-1.05491	3.19536	-2.49094	2.49025	-2.33541	2.54994	-2.21385	2.51936	1.0666	1.96342	3.15704	3.23415	1.91746	2.01048	3.23415	3.15704	1.91746	2.01048	3137	3635	1230	1188	8.12263	7.92889	2.79095	3.19131
8824	NM_003869,NM_198061,NR_036684	CES2	carboxylesterase 2	1.45549	3.83498	-1.18415	3.4497	1.73584	3.95162	1.19262	4.24045	2.05549	3.81443	4.11528	3.57378	3.32993	4.36942	3.57378	4.11528	3.32993	4.36942	2894	5213	3146	5345	10.643	16.3449	9.21332	19.6392
8829	NM_001024628,NM_001024629,NM_001244972,NM_001244973,NM_001330068,NM_003873,NR_045259	NRP1	neuropilin 1	1.59723	5.36664	2.21063	5.58245	1.60345	5.36927	1.00389	5.71785	-1.37867	5.94778	5.71504	5.03947	6.18392	5.72065	5.03947	5.71504	6.18392	5.72065	11770	23105	34401	19591	32.6081	51.7474	70.816	51.1518
8987	NM_003943	STBD1	starch binding domain 1	1.16566	2.59956	-3.32706	1.37338	-1.00528	2.48754	-1.17182	2.5956	3.30958	1.37128	2.71249	2.49134	0.757093	2.48374	2.49134	2.71249	0.757093	2.48374	858	1276	168	940	4.39405	5.55591	0.677512	4.78915
9055	NM_001267580,NM_003981,NM_199413	PRC1	protein regulator of cytokinesis 1	-1.79837	5.726	-1.02759	6.14531	-3.06013	5.29709	-1.70162	4.91991	-2.97796	5.28019	5.31829	6.16498	6.1257	4.55138	6.16498	5.31829	6.1257	4.55138	14971	9397	17767	4635	72.1995	38.6294	67.6965	22.1418
9057	NM_001076785,NM_003983	SLC7A6	solute carrier family 7 member 6	2.20901	3.43858	1.95858	3.36422	2.15058	3.42215	-1.02717	4.0381	1.09803	3.95077	4.05748	2.91408	3.88389	4.01881	2.91408	4.05748	3.88389	4.01881	2612	7649	7285	6453	6.25964	15.6643	13.8011	15.4147
9133	NM_004701	CCNB2	cyclin B2	-2.11147	5.54437	-1.09349	6.04483	-3.36867	5.15971	-1.59541	4.68232	-3.08066	5.10497	5.0314	6.10965	5.98071	4.35747	6.10965	5.0314	5.98071	4.35747	7081	3805	7911	2008	69.1311	31.5816	60.996	19.4963
9149	NM_004714,NM_006483,NM_006484	DYRK1B	dual specificity tyrosine phosphorylation regulated kinase 1B	1.78971	3.05718	1.09985	2.7338	2.15048	3.17059	1.20158	3.63579	1.95524	3.25122	3.50574	2.66601	2.80332	3.77067	2.66601	3.50574	2.80332	3.77067	855	2015	1282	2138	5.09953	10.3247	6.0601	12.8111
9212	NM_001256834,NM_001284526,NM_001313950,NM_001313951,NM_001313952,NM_001313953,NM_001313954,NM_001313955,NM_004217,NR_132730,NR_132731	AURKB	aurora kinase B	-1.69082	6.27495	-1.18765	6.54	-3.11424	5.78808	-1.84186	5.44915	-2.62218	5.67933	5.90752	6.66524	6.41712	5.02636	6.66524	5.90752	6.41712	5.02636	8390	5733	8637	2568	101.528	59.4863	82.5533	30.9338
9232	NM_001282382,NM_001282383,NM_004219	PTTG1	pituitary tumor-transforming 1	-1.8142	6.65551	-1.12261	7.01511	-2.5143	6.39949	-1.3859	5.99967	-2.23969	6.32383	6.2397	7.09904	6.93217	5.76888	7.09904	6.2397	6.93217	5.76888	7152	4586	7843	2746	139.738	75.8063	118.937	53.0158
9236	NM_001204450,NM_001204451,NM_004748,NM_020739	CCPG1	cell cycle progression 1	-1.07688	2.60541	1.32044	2.85286	2.32829	3.21168	2.5073	3.14649	1.76327	3.44533	2.55252	2.65939	3.0604	3.87866	2.65939	2.55252	3.0604	3.87866	2072	2426	3466	5777	5.06639	4.81271	7.40387	13.9008
9403	NM_004261,NM_203341,NR_144512,NR_144513	SELENOF	selenoprotein F	-2.60538	4.92503	1.07276	5.71442	-2.75238	4.87928	-1.05642	4.24271	-2.95263	4.92273	4.28249	5.66398	5.7653	4.2033	5.66398	4.28249	5.7653	4.2033	5908	2518	7795	2019	50.5534	18.5329	52.6947	17.4675
9411	NM_001328664,NM_001328665,NM_001328666,NM_001328667,NM_004815	ARHGAP29	Rho GTPase activating protein 29	1.66858	3.10422	-1.02295	2.74039	-1.31047	2.55433	-2.18662	2.87623	-1.28106	2.53912	3.49543	2.75681	2.72407	2.36672	2.75681	3.49543	2.72407	2.36672	3282	7235	4279	2569	5.50339	10.2518	5.68075	4.34125
9423	NM_004822	NTN1	netrin 1	1.81975	0.910617	1.03957	0.603308	2.62902	1.06534	1.44472	1.68432	2.52896	1.11591	1.43971	0.575967	0.631947	1.97049	0.575967	1.43971	0.631947	1.97049	177	803	270	1221	0.44882	1.73277	0.539718	3.08345
9493	NM_001281301,NM_004856,NM_138555	KIF23	kinesin family member 23	-1.66228	5.45137	-1.03685	5.8041	-2.91501	4.9993	-1.75362	4.67441	-2.81142	4.97687	5.0971	5.83026	5.77806	4.28676	5.83026	5.0971	5.77806	4.28676	12965	8972	15755	4265	56.642	33.1657	53.1662	18.4663
9518	NM_004864	GDF15	growth differentiation factor 15	2.93681	5.51757	1.14378	4.89084	4.52392	5.78207	1.54042	6.65352	3.95526	5.89777	6.34915	4.7949	4.98871	6.97248	4.7949	6.34915	4.98871	6.97248	2501	8800	3604	11388	27.025	80.8841	30.7683	122.429
9537	NM_001258320,NM_001258321,NM_001258322,NM_001258323,NM_001258324,NM_001318384,NM_001318385,NM_001318386,NM_001318387,NM_001318388,NM_001318389,NM_001318390,NM_006034,NR_134612	TP53I11	tumor protein p53 inducible protein 11	1.34193	3.99762	-1.15781	3.68387	1.82698	4.2034	1.36146	4.43239	2.1153	4.08452	4.2154	3.79109	3.57969	4.66055	3.79109	4.2154	3.57969	4.66055	2846	4863	3204	5687	12.549	17.5481	11.1133	23.9836
9540	NM_001206802,NM_004881,NM_147184	TP53I3	tumor protein p53 inducible protein 3	1.81311	7.66905	-1.07639	7.19852	2.51111	7.88807	1.38497	8.34191	2.70294	7.8301	8.11029	7.25182	7.14562	8.58015	7.25182	8.11029	7.14562	8.58015	17162	36683	19713	43307	154.083	278.394	139.764	382.527
9581	NM_001042385,NM_001042386,NM_001171603,NM_001171606,NM_001171613,NM_001171617,NM_006036	PREPL	prolyl endopeptidase-like	2.01748	3.6347	2.05511	3.64628	2.37276	3.73515	1.1761	4.29148	1.15457	4.30515	4.17607	3.16351	4.20273	4.41008	3.16351	4.17607	4.20273	4.41008	3089	8060	8995	8182	7.6293	17.0393	17.5149	20.2318
9618	NM_004295	TRAF4	TNF receptor associated factor 4	1.56744	4.92145	-1.14594	4.50858	2.27352	5.16652	1.45046	5.51807	2.60531	5.05514	5.25633	4.60791	4.41139	5.79284	4.60791	5.25633	4.41139	5.79284	4544	8387	4958	10396	23.6785	37.16	20.4048	53.8775
9645	NM_001282663,NM_001282664,NM_001282665,NM_001282666,NM_001282667,NM_001282668,NM_001346292,NM_001346293,NM_001346294,NM_001346295,NM_001346296,NM_001346297,NM_001346298,NM_001346299,NM_014632,NR_144415,NR_144416,NR_144417,NR_144418,NR_144419,NR_144420	MICAL2	microtubule associated monooxygenase, calponin and LIM domain containing 2	1.46732	4.55142	1.84446	4.70415	2.83549	4.97858	1.93243	5.29032	1.5373	5.46783	4.83641	4.28323	5.16643	5.78683	4.28323	4.83641	5.16643	5.78683	5356	9152	18437	22195	18.3768	27.5104	34.8117	53.6239
9700	NM_012291	ESPL1	extra spindle pole bodies like 1, separase	-1.73151	3.48657	-1.13717	3.81115	-2.9005	3.04134	-1.67513	2.71545	-2.55063	2.96825	3.11297	3.905	3.71955	2.3687	3.905	3.11297	3.71955	2.3687	6046	3941	6821	1914	13.8035	7.65096	12.3003	4.34526
9766	NM_014734	SUSD6	sushi domain containing 6	1.48532	2.23868	-1.05134	1.93496	2.08391	2.44433	1.403	2.77571	2.1909	2.39913	2.54218	1.97141	1.89918	3.0307	1.97141	2.54218	1.89918	3.0307	981	1997	1243	2656	2.75005	4.76052	2.75195	7.40613
9787	NM_001146015,NM_014750	DLGAP5	DLG associated protein 5	-2.00606	4.44272	1.06442	5.01803	-3.65281	3.92909	-1.82089	3.50999	-3.88812	3.96451	3.96883	4.9732	5.06326	3.10419	4.9732	3.96883	5.06326	3.10419	6182	3440	8197	1573	30.9804	14.6224	32.5232	7.84134
9824	NM_001286479,NM_001286480,NM_014783,NM_199357	ARHGAP11A	Rho GTPase activating protein 11A	-1.75157	4.536	1.00562	4.96235	-2.80811	4.14716	-1.60319	3.79394	-2.82389	4.15054	4.14966	4.95831	4.96639	3.46871	4.95831	4.14966	4.96639	3.46871	11381	7466	14059	3694	30.5533	16.7551	30.1994	10.246
9881	NM_001329998,NM_014831	TRANK1	tetratricopeptide repeat and ankyrin repeat containing 1	1.62003	1.08387	1.07809	0.842856	2.49433	1.29108	1.53968	1.77054	2.31366	1.37683	1.48638	0.790362	0.898836	2.10902	0.790362	1.48638	0.898836	2.10902	474	1501	761	2442	0.674431	1.81786	0.855936	3.45969
9918	NM_014865	NCAPD2	non-SMC condensin I complex subunit D2	-1.59929	5.57346	-1.08126	5.86583	-2.05688	5.37713	-1.28612	5.06026	-1.9023	5.32571	5.24503	5.92246	5.80975	4.882	5.92246	5.24503	5.80975	4.882	19323	13766	21804	8990	60.8034	36.8315	54.19	28.133
9928	NM_001305792,NM_014875	KIF14	kinesin family member 14	-1.58979	2.90963	1.13376	3.35254	-2.89782	2.37478	-1.82277	2.11747	-3.28544	2.43979	2.59436	3.2632	3.44432	1.72823	3.2632	2.59436	3.44432	1.72823	3954	2783	6015	1190	8.33248	4.98545	10.0061	2.45782
9991	NM_001163788,NM_001163790,NM_001244896,NM_001244897,NM_001244898,NM_005156	PTBP3	polypyrimidine tract binding protein 3	1.1618	2.7244	2.07565	3.10072	1.08255	2.67497	-1.07321	2.7833	-1.91738	3.16775	2.83473	2.61837	3.67193	2.7328	2.61837	2.83473	3.67193	2.7328	2559	3778	7771	2956	4.90053	6.11863	11.8545	5.82076
10076	NM_001195001,NM_005704,NM_133177,NM_133178	PTPRU	protein tyrosine phosphatase, receptor type U	1.72467	2.34911	-1.0291	1.96783	2.43164	2.55028	1.40991	3.01258	2.50239	2.5236	2.77495	1.98863	1.94724	3.27055	1.98863	2.77495	1.94724	3.27055	1032	2537	1341	3286	2.7917	5.83385	2.86146	8.84039
10078	NM_001297658,NM_001297659,NM_001297660,NM_001297661,NM_005706	TSSC4	tumor suppressing subtransferable candidate 4	1.06973	4.39865	-2.62325	3.58779	-1.03854	4.32293	-1.11096	4.37098	2.5259	3.56522	4.44754	4.35029	2.95894	4.29573	4.35029	4.44754	2.95894	4.29573	2242	2810	1022	2158	19.2982	20.7349	6.83637	18.604
10092	NM_001270439,NM_005717	ARPC5	actin related protein 2/3 complex subunit 5	1.0171	6.26328	1.0179	6.26385	-3.06951	5.38159	-3.12198	5.39211	-3.12445	5.3926	6.27552	6.25106	6.27666	4.63306	6.25106	6.27552	6.27666	4.63306	10499	12538	13046	3241	76.4371	77.6195	75.0204	23.456
10112	NM_005733	KIF20A	kinesin family member 20A	-2.6524	4.38779	-1.14651	5.04791	-4.83685	3.84591	-1.82358	3.2783	-4.21875	3.7715	3.7402	5.1475	4.95025	2.87343	5.1475	3.7402	4.95025	2.87343	8016	3332	8688	1511	34.9214	12.3416	29.8968	6.54333
10140	NM_001243877,NM_001243885,NM_005749	TOB1	transducer of ERBB2, 1	1.44574	4.95598	-4.20149	3.51231	1.87586	5.13096	1.29751	5.41363	7.88142	3.83664	5.22901	4.69721	2.6263	5.60476	4.69721	5.22901	2.6263	5.60476	3725	6308	940	6895	25.2663	36.4434	5.26302	46.7755
10403	NM_006101	NDC80	NDC80, kinetochore complex component	-1.6864	3.3823	-1.03204	3.7574	-2.90056	2.91245	-1.71997	2.60587	-2.81051	2.89487	3.02627	3.78021	3.73472	2.24388	3.78021	3.02627	3.73472	2.24388	1786	1210	2263	564	12.4318	7.15973	12.4416	3.90547
10460	NM_006342	TACC3	transforming acidic coiled-coil containing protein 3	-1.69244	5.10673	-1.10331	5.42899	-2.57045	4.771	-1.51878	4.42956	-2.32977	4.70909	4.74126	5.50037	5.35854	4.13835	5.50037	4.74126	5.35854	4.13835	8540	5633	9455	3158	45.5186	25.5311	39.8063	16.7419
10570	NM_006426	DPYSL4	dihydropyrimidinase like 4	2.06114	3.81041	-1.20772	3.18519	2.57974	3.94912	1.25161	4.52668	3.1156	3.78393	4.36768	3.32424	3.05196	4.69147	3.32424	4.36768	3.05196	4.69147	1570	4153	1675	4429	8.73179	19.6406	7.35732	24.4986
10608	NM_006454	MXD4	MAX dimerization protein 4	1.87851	3.44469	1.16839	3.13004	2.29455	3.56896	1.22147	4.07113	1.96385	3.69926	3.92938	3.01979	3.24431	4.218	3.01979	3.92938	3.24431	4.218	1704	4169	2713	4428	6.82921	14.2052	8.58716	17.6474
10610	NM_006456	ST6GALNAC2	ST6 N-acetylgalactosaminide alpha-2,6-sialyltransferase 2	1.22973	0.342377	1.07869	0.273528	2.04021	0.530133	1.65907	0.809235	1.89138	0.646504	0.522631	0.224292	0.333571	1.25301	0.224292	0.522631	0.333571	1.25301	21	73	46	211	0.149728	0.440434	0.255687	1.50354
10612	NM_001248006,NM_001248007,NM_006458,NM_033278	TRIM3	tripartite motif containing 3	1.59087	3.412	-1.12375	3.00815	2.41985	3.67609	1.52109	4.05459	2.71932	3.57468	3.76331	3.09349	2.92517	4.36841	3.09349	3.76331	2.92517	4.36841	1386	2877	1604	3811	7.22941	12.5687	6.67229	19.6295
10615	NM_006461	SPAG5	sperm associated antigen 5	-1.55452	5.50624	-1.07497	5.78129	-2.31233	5.19392	-1.48748	4.9024	-2.15107	5.14728	5.19719	5.83367	5.72937	4.62432	5.83367	5.19719	5.72937	4.62432	14297	10571	16447	5903	56.7785	35.6944	51.5893	23.3146
10618	NM_001206840,NM_001206841,NM_001206844,NM_006464	TGOLN2	trans-golgi network protein 2	-1.49956	3.21898	5.73427	4.61545	4.95599	4.53439	7.43179	4.14134	-1.15704	5.93795	2.93996	3.52449	6.0441	5.83367	3.52449	2.93996	6.0441	5.83367	4281	3269	34228	23498	10.2542	6.66259	64.4658	55.7551
10926	NM_001318060,NM_001318061,NM_001318062,NM_006716	DBF4	DBF4 zinc finger	-1.52282	3.4293	1.02784	3.76582	-2.16809	3.1386	-1.42373	2.8732	-2.22844	3.15515	3.13932	3.74606	3.78567	2.62964	3.74606	3.13932	3.78567	2.62964	3098	2355	4221	1390	12.1396	7.8308	12.9386	5.37333
10957	NM_006813	PNRC1	proline rich nuclear receptor coactivator 1	1.85776	3.67837	1.2161	3.39683	2.10022	3.75594	1.13052	4.23975	1.72701	3.91524	4.15218	3.25862	3.54089	4.32917	3.25862	4.15218	3.54089	4.32917	1170	2783	1927	2712	8.29239	16.7739	10.7903	19.1184
11004	NM_001297655,NM_001297656,NM_001297657,NM_006845	KIF2C	kinesin family member 2C	-1.78858	4.63351	-1.03385	5.04778	-3.2107	4.14589	-1.79511	3.78757	-3.10557	4.12621	4.23304	5.07186	5.02382	3.38897	5.07186	4.23304	5.02382	3.38897	6330	3984	7616	1845	33.3189	17.8203	31.6548	9.66575
11065	NM_001281741,NM_001281742,NM_007019,NM_181799,NM_181800,NM_181801,NR_104036,NR_104037	UBE2C	ubiquitin conjugating enzyme E2 C	-1.6995	6.81919	-1.19032	7.08568	-3.64203	6.2105	-2.143	5.87186	-3.05972	6.10133	6.44736	7.21247	6.96113	5.34773	7.21247	6.44736	6.96113	5.34773	8378	5741	8589	2202	149.849	87.3678	121.652	39.1411
11098	NM_001293178,NM_001293179,NM_001293180,NM_007173,NR_120591,NR_120592,NR_120593	PRSS23	protease, serine 23	1.08556	7.3849	-6.53721	5.81598	-6.14574	5.87182	-6.67156	5.91909	1.0637	4.66158	7.44436	7.32592	4.61725	4.70634	7.32592	7.44436	4.61725	4.70634	42259	54152	7260	6033	160.99	175.339	23.8744	24.7108
11101	NM_001001976,NM_001288734,NM_001288735,NM_001288736,NM_007041,NR_110006	ATE1	arginyltransferase 1	1.83878	2.78652	2.25185	2.90877	1.71078	2.74167	-1.07482	3.20785	-1.31627	3.34859	3.26032	2.38157	3.55268	3.15623	2.38157	3.26032	3.55268	3.15623	1315	3304	4535	2706	3.98867	8.55954	10.8835	8.16591
11173	NM_014272	ADAMTS7	ADAM metallopeptidase with thrombospondin type 1 motif 7	2.55948	1.79177	1.08183	1.2933	4.90289	2.09075	1.91558	3.02644	4.53205	2.18448	2.59366	1.23781	1.35127	3.53144	1.23781	2.59366	1.35127	3.53144	456	2138	707	3926	1.24659	4.97772	1.52872	10.6921
22824	NM_001317381,NM_001317382,NM_001317383,NM_014278	HSPA4L	heat shock protein family A (Hsp70) member 4 like	1.87241	3.66747	-1.04373	3.21181	2.07385	3.73208	1.10759	4.22079	2.16454	3.69638	4.14773	3.24283	3.18108	4.29514	3.24283	4.14773	3.18108	4.29514	2198	5282	2767	4989	8.18195	16.73	8.16488	18.59
22974	NM_012112	TPX2	TPX2, microtubule nucleation factor	-1.80711	6.19289	-1.06442	6.58923	-3.06404	5.77045	-1.69555	5.38641	-2.87861	5.73114	5.78074	6.63442	6.54436	5.01898	6.63442	5.78074	6.54436	5.01898	24085	15606	28001	7493	99.4619	54.7966	91.3321	30.7735
23107	NM_001286748,NM_001286751,NM_015084	MRPS27	mitochondrial ribosomal protein S27	-1.11168	4.20279	2.67226	4.93824	1.08054	4.33537	1.20122	4.2573	-2.47308	5.0023	4.12711	4.27985	5.69791	4.3916	4.27985	4.12711	5.69791	4.3916	3363	3554	11765	3676	18.3228	16.4491	50.5473	19.9629
23204	NM_001313858,NM_015161	ARL6IP1	ADP ribosylation factor like GTPase 6 interacting protein 1	-1.78485	7.03594	1.10713	7.5393	-2.37253	6.81459	-1.32926	6.42184	-2.6267	6.88127	6.63043	7.46624	7.61307	6.21982	7.46624	6.63043	7.61307	6.21982	28638	18413	38224	11639	179.779	98.2846	189.524	72.6587
23245	NM_001184734,NM_001184735,NM_014010,NM_198186,NM_198187,NM_198188	ASTN2	astrotactin 2	2.5212	2.61359	1.0538	2.06777	2.13371	2.51834	-1.1816	3.24182	2.02478	2.5648	3.36442	2.03032	2.10591	3.12368	2.03032	3.36442	2.10591	3.12368	493	1506	589	1419	2.89908	9.24933	3.35609	7.94638
23308	NM_001283050,NM_001283051,NM_001283052,NM_015259	ICOSLG	inducible T-cell costimulator ligand	1.45895	1.14738	1.00295	0.908942	2.26269	1.37499	1.55091	1.73974	2.25604	1.37821	1.45175	0.906821	0.911068	2.08486	0.906821	1.45175	0.911068	2.08486	177	451	241	742	0.810042	1.75533	0.869189	3.39186
23397	NM_001281710,NM_001281711,NM_001281712,NM_015341	NCAPH	non-SMC condensin I complex subunit H	-1.54599	4.00737	-1.11889	4.25213	-2.363	3.66146	-1.52847	3.38556	-2.11191	3.59234	3.70541	4.33394	4.17187	3.09332	4.33394	3.70541	4.17187	3.09332	7615	5646	8664	3126	19.0448	12.0057	17.1125	7.77672
23479	NM_001301140,NM_001301141,NM_001320042,NM_014301,NM_213595,NR_135127	ISCU	iron-sulfur cluster assembly enzyme	2.04015	5.08768	1.08348	4.65675	2.89989	5.31204	1.42141	5.87614	2.67648	5.37843	5.62795	4.59928	4.71494	6.13528	4.59928	5.62795	4.71494	6.13528	3701	8863	5086	10890	23.542	48.3026	25.4135	68.7193
23603	NM_001105237,NM_001276471,NM_014325	CORO1C	coronin 1C	-2.27268	6.13268	-2.41415	6.08452	-2.71319	5.99029	-1.19383	5.43971	-1.12387	5.39699	5.56901	6.7534	5.48188	5.31341	6.7534	5.56901	5.48188	5.31341	27359	13833	14058	9850	107.26	46.1931	43.5141	38.3864
23612	NM_012396,NR_073080	PHLDA3	pleckstrin homology like domain family A member 3	2.18696	5.77838	-1.03047	5.21972	2.60193	5.89096	1.18975	6.49446	2.68122	5.86657	6.37034	5.24142	5.19811	6.621	5.24142	6.37034	5.19811	6.621	6228	15957	7355	16051	37.4466	82.1425	35.7722	96.944
23654	NM_012401	PLXNB2	plexin B2	1.64904	5.69596	-1.10176	5.2762	1.83134	5.76653	1.11055	6.14336	2.0177	5.69063	6.06819	5.34657	5.20676	6.21947	5.34657	6.06819	5.20676	6.21947	17008	32672	19113	30601	40.5999	66.3167	36.0372	72.6512
23768	NM_001346143,NM_001346144,NM_001346145,NM_001346146,NM_013231,NR_144385,NR_144386,NR_144387	FLRT2	fibronectin leucine rich transmembrane protein 2	1.66659	2.44781	-1.01901	2.09331	2.39138	2.66259	1.43489	3.09336	2.43685	2.64537	2.84384	2.10694	2.07977	3.36478	2.10694	2.84384	2.07977	3.36478	835	1644	1257	2222	3.11343	6.1858	3.27095	9.48009
24137	NM_012310	KIF4A	kinesin family member 4A	-1.78457	4.46736	-1.03626	4.87888	-2.73567	4.11516	-1.53296	3.74826	-2.63995	4.09354	4.06907	4.90464	4.85326	3.45275	4.90464	4.06907	4.85326	3.45275	8739	5539	10528	3038	29.36	15.822	27.9369	10.1484
25764	NM_001199885,NM_016400	HYPK	huntingtin interacting protein K	-2.35623	3.88425	-2.22725	3.93154	-2.14379	3.96331	1.0991	3.38237	1.03893	3.42356	3.3149	4.55138	3.39612	3.45122	4.55138	3.3149	3.39612	3.45122	1983	917	1066	893	22.635	8.92196	9.61726	10.1375
25804	NM_001252129,NM_012321	LSM4	LSM4 homolog, U6 small nuclear RNA and mRNA degradation associated	-2.04139	5.27759	-1.02902	5.79674	-1.99668	5.29517	1.02239	4.80381	-1.94036	5.27635	4.78786	5.81742	5.77614	4.81981	5.81742	4.78786	5.77614	4.81981	6745	3773	8093	3252	56.0025	26.6382	53.0971	26.8801
25897	NM_001280539,NM_015435,NM_183419	RNF19A	ring finger protein 19A, RBR E3 ubiquitin protein ligase	2.14756	3.66323	2.51886	3.76095	1.12657	3.23797	-1.90628	3.76178	-2.23586	3.86213	4.25584	3.15314	4.48591	3.32508	3.15314	4.25584	4.48591	3.32508	2198	6204	7885	2679	7.58081	18.1062	21.5376	9.19032
25946	NM_001130967,NM_001130968,NM_001290001,NM_001290002,NM_001290004,NM_015481	ZNF385A	zinc finger protein 385A	1.68841	2.98779	-1.07517	2.58094	2.93022	3.31988	1.73549	3.76615	3.15048	3.25331	3.38942	2.63375	2.52919	4.18476	2.63375	3.38942	2.52919	4.18476	764	1708	960	2685	4.96263	9.44623	4.85604	17.2556
25960	NM_032777	ADGRA2	adhesion G protein-coupled receptor A2	1.61096	1.23925	1.08556	0.999612	2.43931	1.44903	1.5142	1.90598	2.24705	1.53741	1.63006	0.942143	1.06059	2.22862	0.942143	1.63006	1.06059	2.22862	340	989	539	1547	0.851867	2.10662	1.06614	3.85489
26147	NM_001009936,NM_001286840,NM_001286842,NM_001286843,NM_015651,NR_104601	PHF19	PHD finger protein 19	-1.52433	5.26496	-1.17517	5.46015	-2.05747	5.03054	-1.34975	4.74837	-1.75078	4.92441	4.96965	5.57782	5.34495	4.53695	5.57782	4.96965	5.34495	4.53695	4891	3499	5380	2180	48.0453	30.3739	39.3414	21.9086
26152	NM_001290261,NM_015655	ZNF337	zinc finger protein 337	-3.32628	2.68253	-4.1242	2.46019	2.02616	4.16444	6.73957	3.03064	8.35628	2.77945	1.95219	3.6861	1.64199	4.70485	3.6861	1.95219	1.64199	4.70485	3455	1011	795	7400	11.6142	2.8762	2.10709	24.6779
26263	NM_012170,NM_147188,NR_037623	FBXO22	F-box protein 22	2.10127	5.06136	1.12781	4.63994	2.70454	5.2226	1.2871	5.80446	2.39805	5.32117	5.62525	4.55399	4.72752	5.98938	4.55399	5.62525	4.72752	5.98938	5031	12436	6999	13627	22.7154	48.1382	25.6376	62.0285
26271	NM_001142522,NM_012177	FBXO5	F-box protein 5	-1.60985	3.55221	-1.20328	3.7764	-2.62254	3.14068	-1.62906	2.85165	-2.17949	3.03162	3.22532	3.91224	3.64527	2.52128	3.91224	3.22532	3.64527	2.52128	1971	1398	2107	717	13.8689	8.34937	11.6035	4.94975
26471	NM_001042483,NM_012385	NUPR1	nuclear protein 1, transcriptional regulator	1.71784	4.12094	1.55486	4.055	3.515	4.5667	2.04617	5.01965	2.26066	4.93932	4.52968	3.74909	4.38587	5.56261	3.74909	4.52968	4.38587	5.56261	699	1478	1444	2606	12.1599	21.9679	20.0026	45.3006
26820	NR_002447	SNORD24	small nucleolar RNA, C/D box 24	-1.60746	1.6645	-1.5594	1.69115	-2.53317	1.19619	-1.57588	0.975176	-1.62445	0.990788	1.35696	2.04175	1.40076	0.700806	2.04175	1.35696	1.40076	0.700806	15	10	11	4	2.93076	1.57362	1.62101	0.68699
26999	NM_001037333,NM_001291721,NM_001291722,NM_014376	CYFIP2	cytoplasmic FMR1 interacting protein 2	2.275	4.44941	1.08116	3.9517	3.08743	4.63827	1.35711	5.29737	2.85566	4.70481	5.08168	3.89581	4.0084	5.52222	3.89581	5.08168	4.0084	5.52222	5904	16614	8250	18945	13.7228	32.8489	15.1614	43.828
27065	NM_001040101,NM_001287763,NM_001287764,NM_014392	NSG1	neuron specific gene family member 1	1.33366	0.622909	-1.13296	0.347394	1.93373	0.792868	1.44994	1.10014	2.19084	0.613546	0.864317	0.448928	0.268825	1.40031	0.448928	0.864317	0.268825	1.40031	60	159	41	286	0.334213	0.826433	0.202292	1.75916
27244	NM_001199933,NM_001199934,NM_014454	SESN1	sestrin 1	3.96847	2.64335	1.69978	2.17921	5.96963	2.83993	1.50426	4.10243	3.512	3.38209	3.81846	1.82988	2.59522	4.40752	1.82988	3.81846	2.59522	4.40752	459	2801	1205	3710	2.40131	13.158	5.1294	20.1982
27338	NM_014501	UBE2S	ubiquitin conjugating enzyme E2 S	-2.00388	7.8142	-1.2773	8.15321	-3.03069	7.48925	-1.51241	7.02411	-2.37274	7.32884	7.32887	8.33167	7.97857	6.73202	8.33167	7.32887	7.97857	6.73202	25564	14915	24520	8215	324.598	161.025	245.908	103.738
27350	NM_014508	APOBEC3C	apolipoprotein B mRNA editing enzyme catalytic subunit 3C	1.93154	5.23093	1.06059	4.81981	2.53076	5.40601	1.31023	5.91902	2.38617	5.45382	5.72731	4.77756	4.86243	6.11713	4.77756	5.72731	4.86243	6.11713	1960	4510	2611	5032	26.725	52.2919	28.1164	68.2425
28231	NM_016354	SLCO4A1	solute carrier organic anion transporter family member 4A1	-1.68091	1.85516	-1.47714	1.96579	-2.28241	1.56239	-1.35785	1.27843	-1.54516	1.35466	1.51799	2.26723	1.70442	1.07667	2.26723	1.51799	1.70442	1.07667	660	405	523	223	3.59385	1.87153	2.2496	1.20545
29071	NM_001011551,NM_152692	C1GALT1C1	C1GALT1 specific chaperone 1	-5.46129	2.79443	1.16406	4.38383	-6.39254	2.61489	-1.17052	1.70903	-7.4413	2.68107	1.82637	4.27561	4.49478	1.59922	4.27561	1.82637	4.49478	1.59922	2094	346	3141	251	18.2725	2.56185	21.6491	2.16365
29127	NM_001126103,NM_001126104,NM_001319999,NM_001320000,NM_001320001,NM_001320002,NM_001320003,NM_001320004,NM_001320005,NM_001320006,NM_001320007,NM_013277	RACGAP1	Rac GTPase activating protein 1	-1.58086	5.09602	-1.03946	5.40908	-2.69952	4.66605	-1.70763	4.37336	-2.59705	4.64203	4.77636	5.43707	5.38124	4.00436	5.43707	4.77636	5.38124	4.00436	9155	6521	10780	3223	43.3946	26.3102	40.5163	15.2265
29128	NM_001048201,NM_001290050,NM_001290051,NM_001290052,NM_013282	UHRF1	ubiquitin like with PHD and ring finger domains 1	-1.84082	4.3284	-1.21879	4.64598	-2.93731	3.93767	-1.59565	3.55754	-2.41001	3.81856	3.91055	4.79089	4.50544	3.2364	4.79089	3.91055	4.50544	3.2364	7064	4334	7254	2297	26.9239	14.0127	21.8305	8.62674
29899	NM_001321038,NM_001321039,NM_013296	GPSM2	G protein signaling modulator 2	-1.47721	3.07528	1.08493	3.42786	-1.98992	2.83002	-1.34708	2.58285	-2.15891	2.87898	2.80669	3.36957	3.48717	2.37686	3.36957	2.80669	3.48717	2.37686	1872	1445	2651	908	9.09024	5.99527	10.3466	4.37555
29950	NM_013376	SERTAD1	SERTA domain containing 1	1.80477	4.72535	1.03223	4.34143	2.80002	5.00653	1.55146	5.47808	2.71259	5.03299	5.17042	4.3186	4.36437	5.80404	4.3186	5.17042	4.36437	5.80404	1499	3270	1984	4352	18.8213	34.917	19.6747	54.3529
29965	NM_001199054,NM_001199055,NM_001199056,NM_013399	CDIP1	cell death inducing p53 target 1	1.85676	2.29859	-1.00412	1.89218	3.06696	2.57986	1.65178	3.12907	3.07959	2.57582	2.78793	1.89514	1.88922	3.51195	1.89514	2.78793	1.88922	3.51195	461	1252	623	1923	2.55065	5.90438	2.71232	10.564
50484	NM_001172477,NM_001172478,NM_015713	RRM2B	ribonucleotide reductase regulatory TP53 inducible subunit M2B	1.86365	3.94875	1.14825	3.62348	-1.43532	3.25403	-2.67492	3.64506	-1.6481	3.34481	4.42327	3.52514	3.72457	3.00377	3.52514	4.42327	3.72457	3.00377	3339	7780	5101	2364	10.2572	20.4228	12.3537	7.24475
50624	NM_022034,NR_037912	CUZD1	CUB and zona pellucida like domains 1	-1.01392	1.07911	1.03675	1.11485	-2.05357	0.235659	-2.02537	0.23349	-2.12903	0.241225	1.06918	1.08913	1.14119	0.0509904	1.08913	1.06918	1.14119	0.0509904	158	192	222	7	1.04281	1.10437	1.18444	0.041479
50808	NM_001199852,NM_001199853,NM_001199855,NM_001199856,NM_016282	AK3	adenylate kinase 3	-2.2047	3.51329	1.07052	4.17843	1.24375	4.28403	2.74211	3.6447	1.16183	4.33472	2.98898	4.12956	4.22787	4.44427	4.12956	2.98898	4.22787	4.44427	4584	2293	6427	5833	16.3576	6.94434	17.8349	20.6875
51109	NM_001252650,NM_016026	RDH11	retinol dehydrogenase 11 (all-trans/9-cis/11-cis)	-1.07673	4.04056	1.10184	4.16361	2.12392	4.60566	2.28689	4.54527	1.9276	4.6837	3.98758	4.09424	4.23416	5.18097	4.09424	3.98758	4.23416	5.18097	2692	2948	3839	5920	15.9021	14.828	17.9275	34.8611
51114	NM_001008222,NM_016032	ZDHHC9	zinc finger DHHC-type containing 9	-1.64227	3.57204	-1.68843	3.54987	1.25941	4.11077	2.06828	3.71953	2.12642	3.69644	3.23207	3.94776	3.19208	4.2805	3.94776	3.23207	3.19208	4.2805	4345	3014	3194	5655	14.2173	8.37967	8.24624	18.4074
51203	NM_001243142,NM_001243143,NM_001243144,NM_001301136,NM_016359,NM_018454	NUSAP1	nucleolar and spindle associated protein 1	-1.53467	5.31389	1.00066	5.6323	-2.13852	5.05386	-1.39348	4.76856	-2.13993	5.05429	5.0139	5.63183	5.63278	4.53521	5.63183	5.0139	5.63278	4.53521	8020	5910	9879	3548	49.796	31.2257	48.458	21.8944
51341	NM_001317990,NM_015898	ZBTB7A	zinc finger and BTB domain containing 7A	-1.10107	2.48461	-1.24798	2.3899	-2.11357	1.94154	-1.91956	1.88802	-1.69359	1.81605	2.41613	2.55503	2.23543	1.47535	2.55503	2.41613	2.23543	1.47535	1977	2162	2017	807	4.65156	4.32398	3.7821	1.90015
51499	NM_016399	TRIAP1	TP53 regulated inhibitor of apoptosis 1	1.93904	5.84721	1.02211	5.40477	2.4961	6.01276	1.28728	6.52399	2.4421	6.03033	6.34437	5.38902	5.42057	6.70869	5.38902	6.34437	5.42057	6.70869	3269	7405	4121	8033	41.817	80.5536	41.6413	102.214
51512	NM_016426	GTSE1	G2 and S-phase expressed 1	-1.72333	3.86695	-1.11841	4.19793	-3.29883	3.30825	-1.91422	2.98939	-2.94958	3.24525	3.49423	4.27943	4.11799	2.55748	4.27943	3.49423	4.11799	2.55748	3771	2480	4278	1055	18.3211	10.2472	16.4192	5.09839
54443	NM_001284301,NM_001284302,NM_018685	ANLN	anillin actin binding protein	-1.49345	5.37003	-1.00578	5.66298	-2.41676	4.99017	-1.61824	4.72855	-2.40287	4.98651	5.0885	5.66715	5.65883	4.39407	5.66715	5.0885	5.65883	4.39407	15908	12168	19675	6340	50.7135	32.9854	49.2888	19.9988
54478	NM_001195228,NM_019013	PIMREG	PICALM interacting mitotic regulator	-1.83613	4.61995	-1.15885	4.97155	-2.95658	4.22532	-1.61022	3.8434	-2.55131	4.1359	4.20236	5.07903	4.86634	3.5151	5.07903	4.20236	4.86634	3.5151	3413	2088	3640	1084	33.4541	17.4098	28.1797	10.5769
54626	NM_019089	HES2	hes family bHLH transcription factor 2	2.14295	0.899155	1.10865	0.573722	3.67814	1.09608	1.71639	1.95495	3.31768	1.24739	1.60373	0.504126	0.652926	2.3831	0.504126	1.60373	0.652926	2.3831	108	683	199	1248	0.382591	2.05974	0.557362	4.40355
54821	NM_001009954,NM_017669	ERCC6L	ERCC excision repair 6 like, spindle assembly checkpoint helicase	-1.38884	3.29783	-1.04038	3.5146	-2.31223	2.87575	-1.66486	2.67655	-2.22249	2.85249	3.06939	3.54327	3.48617	2.33399	3.54327	3.06939	3.48617	2.33399	2936	2451	3693	1195	10.4089	7.39521	10.344	4.23034
54832	NM_001018088,NM_017684,NM_018080,NM_020821	VPS13C	vacuolar protein sorting 13 homolog C	1.80431	2.47924	1.81036	2.48127	2.19655	2.59609	1.21739	3.07988	1.21332	3.0824	2.94125	2.0898	2.94607	3.22504	2.0898	2.94125	2.94607	3.22504	2761	6919	7577	7608	3.07029	6.66816	6.77324	8.55826
54865	NM_015590,NM_182679	GPATCH4	G-patch domain containing 4	-1.0935	5.4637	-2.80049	4.72771	-1.14109	5.43252	-1.04352	5.36879	2.45423	4.64559	5.3996	5.52856	4.04288	5.33815	5.52856	5.3996	4.04288	5.33815	6590	6920	2786	5562	46.3523	41.3159	15.4718	38.9132
54884	NM_017750	RETSAT	retinol saturase	2.02212	5.37784	1.07331	4.94461	3.0597	5.64317	1.51311	6.20127	2.85071	5.70171	5.90971	4.89384	4.99591	6.50723	4.89384	5.90971	4.99591	6.50723	6375	15346	8584	19386	29.1171	59.5961	30.967	88.0595
54908	NM_001329639,NM_001329640,NM_001329641,NM_001329642,NM_001329643,NM_017785	SPDL1	spindle apparatus coiled-coil protein 1	-1.30415	5.13686	-1.2488	5.16923	-2.20359	4.72782	-1.68968	4.55481	-1.76457	4.58351	4.94888	5.33198	5.01144	4.19212	5.33198	4.94888	5.01144	4.19212	8001	6902	9232	4021	40.2516	29.9497	31.327	17.3362
55065	NM_001104577,NM_017986	SLC52A1	solute carrier family 52 member 1	3.78312	0.739142	1.19848	0.359224	8.37985	0.913802	2.21506	2.68426	6.99207	1.30455	2.1712	0.251626	0.512832	3.31855	0.251626	2.1712	0.512832	3.31855	27	650	85	1455	0.170799	3.48759	0.416007	9.13751
55143	NM_001256875,NM_018101	CDCA8	cell division cycle associated 8	-1.9138	4.41617	-1.12075	4.82621	-3.70733	3.84961	-1.93716	3.46304	-3.30789	3.78458	3.9727	4.90914	4.74467	3.01876	4.90914	3.9727	4.74467	3.01876	4774	2798	5329	1202	29.4677	14.6963	25.9407	7.32357
55165	NM_001127182,NM_018131	CEP55	centrosomal protein 55	-1.52735	5.36584	-1.03842	5.65278	-2.26211	5.05705	-1.48107	4.7773	-2.17841	5.03277	5.06902	5.68005	5.62565	4.50238	5.68005	5.06902	5.62565	4.50238	8916	6676	10665	3759	51.122	32.5557	48.3122	21.438
55191	NM_018161	NADSYN1	NAD synthetase 1	1.66656	5.27934	-1.0156	4.91257	2.07461	5.42469	1.24485	5.81646	2.10698	5.41237	5.66062	4.92375	4.90141	5.97659	4.92375	5.66062	4.90141	5.97659	4781	9389	5878	9961	29.7498	49.6824	28.8889	61.6501
55210	NM_001170535,NM_001170536,NM_018188	ATAD3A	ATPase family, AAA domain containing 3A	-1.31875	4.36003	-1.20476	4.42777	-2.00711	4.03041	-1.52198	3.85013	-1.66598	3.90995	4.16501	4.56418	4.29543	3.55906	4.56418	4.16501	4.29543	3.55906	3629	3145	3782	1818	22.9031	16.9296	18.7438	10.9239
55247	NM_018248	NEIL3	nei like DNA glycosylase 3	-1.29929	4.06313	1.01878	4.26978	-2.02116	3.71427	-1.55559	3.54563	-2.05912	3.72596	3.87866	4.25638	4.28323	3.2412	4.25638	3.87866	4.28323	3.2412	2860	2556	3727	1384	18.0027	13.6797	18.5325	8.6607
55270	NM_001304745,NM_018283,NR_136687,NR_136688	NUDT15	nudix hydrolase 15	-1.0485	4.47195	-1.09533	4.44008	-4.02719	3.35406	-3.84089	3.32854	-3.67669	3.30481	4.43792	4.50625	4.37488	2.49648	4.50625	4.43792	4.37488	2.49648	2970	3282	3371	591	21.9106	20.6175	19.8232	4.8411
55320	NM_018353	MIS18BP1	MIS18 binding protein 1	-1.41773	3.30478	1.15682	3.66973	-1.76105	3.13144	-1.24216	2.90193	-2.03722	3.22239	3.06257	3.56615	3.77632	2.74972	3.56615	3.06257	3.77632	2.74972	3344	2734	5131	1873	10.586	7.35804	12.8299	5.89421
55344	NM_018390_chrX,NM_018390_chrY,NR_028057_chrX,NR_028057_chrY	PLCXD1	phosphatidylinositol specific phospholipase C X domain containing 1	-1.53836	3.75438	-1.41531	3.81914	-2.31059	3.42084	-1.50198	3.14944	-1.63257	3.20377	3.45651	4.07791	3.57679	2.86965	4.07791	3.45651	3.57679	2.86965	4495	3224	4834	2274	15.6997	9.9489	11.0908	6.52108
55355	NM_001282962,NM_001282963,NM_018410	HJURP	Holliday junction recognition protein	-1.42282	5.99417	-1.17136	6.13879	-2.84666	5.44728	-2.00072	5.22102	-2.43022	5.34698	5.74519	6.25394	6.02576	4.74467	6.25394	5.74519	6.02576	4.74467	16141	13145	16911	5409	76.5985	53.0207	63.4171	25.545
55362	NM_001318792,NM_018426	TMEM63B	transmembrane protein 63B	1.57029	3.87649	1.07571	3.61688	2.20714	4.09609	1.40557	4.45446	2.05181	4.15614	4.21565	3.56462	3.66991	4.7068	3.56462	4.21565	3.66991	4.7068	2297	4493	3261	5403	10.5763	17.5528	11.8456	24.7316
55366	NM_001346432,NM_018490	LGR4	leucine rich repeat containing G protein-coupled receptor 4	-3.33058	4.41507	-2.35243	4.71012	-3.19489	4.45139	1.04247	3.66155	-1.35812	3.90625	3.63167	5.36745	4.13329	3.69168	5.36745	3.63167	4.13329	3.69168	14142	4603	7231	4194	41.0766	11.3505	16.5863	12.1023
55384	NR_002766,NR_003530,NR_003531,NR_033358,NR_033359,NR_033360,NR_046464,NR_046465,NR_046466,NR_046467,NR_046469,NR_046470,NR_046471,NR_046472,NR_046473	MEG3	maternally expressed 3 (non-protein coding)	1.82277	5.11564	1.09217	4.76405	2.03064	5.18673	1.11404	5.64437	1.85928	5.25644	5.56701	4.70087	4.82807	5.72281	4.70087	5.56701	4.82807	5.72281	3772	7360	5172	7049	25.3431	46.1591	27.5161	51.2682
55388	NM_018518,NM_182751	MCM10	minichromosome maintenance 10 replication initiation factor	-1.65155	3.76668	-1.22449	3.99718	-2.22274	3.52297	-1.34585	3.2007	-1.81523	3.39656	3.42212	4.14594	3.85376	2.9936	4.14594	3.42212	3.85376	2.9936	4985	3425	5154	2175	16.5724	9.6839	13.5344	7.19077
55588	NM_001317770,NM_017592,NR_133915	MED29	mediator complex subunit 29	-1.0474	3.58296	-1.1553	3.51084	2.88383	4.31338	3.02053	4.27335	3.33168	4.18734	3.54971	3.61652	3.40826	5.14451	3.61652	3.54971	3.40826	5.14451	2660	3033	2969	8288	11.0164	10.6779	9.70934	34.0522
55596	NM_001350935,NM_001350936,NM_001350937,NM_001350938,NM_017612	ZCCHC8	zinc finger CCHC-type containing 8	-2.24669	2.8133	1.01363	3.4669	-2.10977	2.86849	1.0649	2.33427	-2.13852	2.87658	2.28935	3.45715	3.47668	2.38007	3.45715	2.28935	3.47668	2.38007	2788	1317	3760	1268	9.68078	3.86653	10.2869	4.39018
55632	NM_001308097,NM_017769	G2E3	G2/M-phase specific E3 ubiquitin protein ligase	-1.49054	2.51227	1.09578	2.88185	-2.02389	2.25134	-1.35782	2.00806	-2.21773	2.30347	2.2408	2.81663	2.94859	1.7995	2.81663	2.2408	2.94859	1.7995	2210	1679	3295	1016	5.76078	3.71868	6.78525	2.63084
55635	NM_001114120,NM_017779	DEPDC1	DEP domain containing 1	-2.61049	2.99298	1.12351	3.84722	-3.22009	2.79611	-1.23352	2.22327	-3.61779	2.85783	2.37981	3.76413	3.93214	2.07703	3.76413	2.37981	3.93214	2.07703	4072	1595	5813	1110	12.3091	4.18477	14.3109	3.37315
55771	NM_018304	PRR11	proline rich 11	-1.73881	4.35388	-1.00485	4.76769	-2.94958	3.91391	-1.69632	3.57159	-2.93534	3.91105	3.97308	4.77118	4.7642	3.21067	4.77118	3.97308	4.7642	3.21067	11381	7398	14249	3650	26.5878	14.6963	26.2935	8.47996
55789	NM_001145208,NM_018369	DEPDC1B	DEP domain containing 1B	-1.68599	3.48594	1.0504	3.91835	-2.53514	3.14113	-1.50365	2.8199	-2.66291	3.1697	3.12944	3.88304	3.95398	2.54098	3.88304	3.12944	3.95398	2.54098	2235	1509	3054	839	13.5549	7.76327	14.5667	5.03702
55812	NM_001040428,NM_018418	SPATA7	spermatogenesis associated 7	1.49866	2.39916	1.20511	2.25558	2.03302	2.58667	1.35655	2.92039	1.68699	2.74561	2.70869	2.12501	2.39418	3.14863	2.12501	2.70869	2.39418	3.14863	409	844	713	1059	3.16521	5.53965	4.32085	8.09654
55901	NM_018676,NM_199263	THSD1	thrombospondin type 1 domain containing 1	2.4757	3.22137	-1.11681	2.55222	4.08479	3.50421	1.64995	4.28702	4.56192	3.39651	3.94099	2.63316	2.47378	4.66342	2.63316	3.94099	2.47378	4.66342	1070	3664	1270	5250	4.95949	14.3448	4.63614	24.0199
55924	NM_019099,NM_198926	FAM212B	family with sequence similarity 212 member B	1.74046	1.02749	1.10097	0.769044	2.52797	1.19758	1.45248	1.75092	2.29613	1.3105	1.50224	0.702779	0.841557	2.04076	0.702779	1.50224	0.841557	2.04076	228	857	394	1300	0.575844	1.84231	0.786281	3.26729
55959	NM_001161841,NM_018837,NM_198596	SULF2	sulfatase 2	3.13093	3.96972	1.02926	3.25164	4.76175	4.20869	1.52087	5.17111	4.62639	4.2357	4.87749	3.2309	3.27251	5.48239	3.2309	4.87749	3.27251	5.48239	2203	8760	2972	11528	8.09962	28.4293	8.76711	42.7369
56204	NM_001286495,NM_019600,NR_104457	FAM214A	family with sequence similarity 214 member A	1.47724	2.01709	1.12589	1.83872	2.08855	2.22385	1.41382	2.5557	1.85502	2.32971	2.31808	1.75518	1.92624	2.81768	1.75518	2.31808	1.92624	2.81768	627	1341	1027	1786	2.23532	3.97078	2.81163	6.26774
56603	NM_001277742,NM_019885	CYP26B1	cytochrome P450 family 26 subfamily B member 1	-1.8306	1.63777	-2.13457	1.4866	-2.13315	1.48729	-1.16527	1.14305	1.00067	1.03754	1.25869	2.13101	1.03706	1.03803	2.13101	1.25869	1.03706	1.03803	938	501	393	337	3.18205	1.41169	1.02799	1.14895
56616	NM_001278302,NM_001278303,NM_001278304,NM_001278342,NM_019887,NM_138930	DIABLO	diablo IAP-binding mitochondrial protein	-1.94192	4.70859	-2.0698	4.6574	1.05241	5.24833	2.0437	4.74177	2.17828	4.69021	4.25413	5.21161	4.16212	5.28531	5.21161	4.25413	4.16212	5.28531	5272	3075	3135	5484	36.511	18.0875	16.9994	37.481
56650	NM_001040181,NM_001040182,NM_001040183,NM_001040199,NM_001040200,NM_019895	CLDND1	claudin domain containing 1	-2.14329	3.83788	1.1453	4.5238	1.1727	4.54045	2.51343	3.93625	1.02392	4.63974	3.32717	4.42699	4.62272	4.65682	4.42699	3.32717	4.62272	4.65682	2963	1557	4401	3489	20.54	9.00902	23.9083	23.8855
56674	NM_001286094,NM_001286095,NM_020644	TMEM9B	TMEM9 domain family member B	2.95542	3.51314	2.68693	3.45761	2.91595	3.50536	-1.01353	4.37103	1.08524	4.30193	4.38074	2.81738	4.24333	4.36134	2.81738	4.38074	4.24333	4.36134	796	3218	3157	2674	5.76339	19.8275	18.0496	19.5518
56963	NM_001166283,NM_001166286,NM_001166287,NM_001166288,NM_001166289,NM_020211	RGMA	repulsive guidance molecule family member a	1.44413	0.162985	-1.00109	0.0453051	2.11991	0.228236	1.46795	0.807011	2.12221	0.224326	0.576292	0.0460948	0.0445289	1.1301	0.0460948	0.576292	0.0445289	1.1301	7	122	8	274	0.028118	0.493693	0.029539	1.29315
56992	NM_020242	KIF15	kinesin family member 15	-1.47136	2.4851	1.04565	2.81126	-1.99131	2.22764	-1.35338	1.99188	-2.08221	2.2533	2.22209	2.77924	2.84364	1.78552	2.77924	2.22209	2.84364	1.78552	1793	1377	2535	836	5.6035	3.65834	6.25788	2.5969
56997	NM_020247	COQ8A	coenzyme Q8A	1.4973	3.7806	-1.04924	3.46577	2.0319	3.9793	1.35705	4.29757	2.13195	3.93969	4.08298	3.50062	3.43127	4.52345	3.50062	4.08298	3.43127	4.52345	1942	3635	2424	4235	10.0436	15.982	9.89834	21.779
57103	NM_020375	TIGAR	TP53 induced glycolysis regulatory phosphatase	1.86658	3.12495	-1.00759	2.70156	2.19904	3.22575	1.17811	3.72377	2.21573	3.21924	3.60741	2.70701	2.69611	3.84389	2.70701	3.60741	2.69611	3.84389	2879	7144	3837	7394	5.29258	11.1687	5.57163	13.5206
57120	NM_001017408,NM_020399	GOPC	golgi associated PDZ and coiled-coil motif containing	-2.25721	3.14138	1.05863	3.82395	-2.32622	3.1151	-1.03057	2.58671	-2.4626	3.14877	2.60853	3.78307	3.86527	2.56508	3.78307	2.60853	3.86527	2.56508	3794	1813	5256	1573	12.457	5.05247	13.6339	5.13601
57405	NM_020675	SPC25	SPC25, NDC80 kinetochore complex component	-1.27661	4.07273	-1.14133	4.15625	-2.01298	3.7139	-1.57682	3.55674	-1.76372	3.62967	3.90038	4.2527	4.06199	3.24337	4.2527	3.90038	4.06199	3.24337	1599	1457	1772	777	17.9586	13.9103	15.7214	8.67255
57698	NM_001127211,NM_001258298,NM_001258299,NM_001258300,NM_018330	SHTN1	shootin 1	-1.06979	3.27676	1.83426	3.73786	-1.1069	3.2517	-1.03469	3.20377	-2.03036	3.65459	3.22846	3.32579	4.20099	3.17926	3.32579	3.22846	4.20099	3.17926	2852	3206	7741	2899	8.73935	8.3678	17.5076	8.29725
57713	NM_001018039,NM_001029880	SFMBT2	Scm-like with four mbt domains 2	3.60643	1.9293	3.6716	1.93742	3.49591	1.91512	-1.03161	3.04246	-1.05026	3.05526	3.065	1.21443	3.09084	3.02009	1.21443	3.065	3.09084	3.02009	647	4569	5099	3911	1.21747	7.37117	7.58943	7.3293
57763	NM_023039	ANKRA2	ankyrin repeat family A member 2	1.86708	2.83481	1.22806	2.56388	3.45799	3.19184	1.85209	3.73899	2.81581	3.38165	3.32075	2.41997	2.71635	4.2099	2.41997	3.32075	2.71635	4.2099	599	1533	1040	2565	4.1213	8.96398	5.64743	17.5463
57804	NM_001256870,NM_021173,NR_046411,NR_046412,NR_046413	POLD4	DNA polymerase delta 4, accessory subunit	-1.9489	5.15612	-2.52617	4.94643	-1.7862	5.22469	1.09109	4.75967	1.41427	4.5661	4.69721	5.65987	4.32291	4.82297	5.65987	4.69721	4.32291	4.82297	5632	3231	2694	3035	50.5024	24.7089	19.0927	26.9357
57822	NM_001195010,NM_021180,NM_198173,NM_198174	GRHL3	grainyhead like transcription factor 3	1.64085	1.04759	-1.06327	0.703962	2.3313	1.21543	1.42079	1.6986	2.47879	1.14143	1.46405	0.749604	0.661099	1.97074	0.749604	1.46405	0.661099	1.97074	120	397	137	589	0.629408	1.77517	0.569308	3.08468
60401	NM_001199687,NM_001242310,NM_001324199,NM_001324201,NM_001324202,NM_001324204,NM_001324205,NM_001324206,NM_021783,NR_136726,NR_136727	EDA2R	ectodysplasin A2 receptor	1.94846	3.56813	1.151	3.2191	2.33563	3.68064	1.1987	4.2103	2.02921	3.79846	4.08159	3.11925	3.32215	4.34307	3.11925	4.08159	3.32215	4.34307	1610	4148	2529	4268	7.39005	15.9759	9.15558	19.3182
60492	NM_001286116,NM_001286117,NM_001286118,NM_001286119,NM_001286120,NM_021825	CCDC90B	coiled-coil domain containing 90B	1.61738	3.74643	1.08034	3.47091	2.08745	3.91062	1.29064	4.28937	1.93222	3.97393	4.10928	3.41562	3.5271	4.47736	3.41562	4.10928	3.5271	4.47736	2560	5216	3668	5789	9.4235	16.2859	10.6727	21.0931
60526	NM_001282719,NM_001282720,NM_001282721,NM_001282722,NM_001282723,NM_001282724,NM_021925,NR_104233	LDAH	lipid droplet associated hydrolase	2.67381	2.95082	2.67202	2.95044	2.79819	2.97656	1.04652	3.77701	1.04722	3.77652	3.74436	2.32546	3.74339	3.80995	2.32546	3.74436	3.74339	3.80995	954	3769	4093	3431	3.77262	12.3827	12.5064	13.1699
64151	NM_022346,NR_073124	NCAPG	non-SMC condensin I complex subunit G	-1.55512	3.95283	-1.06722	4.23697	-2.37073	3.60815	-1.52447	3.32911	-2.22141	3.56841	3.64712	4.28415	4.1903	3.03882	4.28415	3.64712	4.1903	3.03882	5775	4243	6907	2354	18.3858	11.4894	17.3615	7.44938
64219	NM_001032396,NM_022368,NM_145119	PJA1	praja ring finger ubiquitin ligase 1	1.16081	3.39952	-3.80706	2.12032	1.15093	3.39354	-1.00859	3.50261	4.38168	2.18462	3.50879	3.29365	1.36497	3.49645	3.29365	3.50879	1.36497	3.49645	1523	2149	333	1832	8.51388	10.3451	1.55496	10.4596
64764	NM_001253775,NM_001318246,NM_194071	CREB3L2	cAMP responsive element binding protein 3 like 2	-2.30937	3.16075	-2.49298	3.0933	-1.00236	3.81994	2.30392	3.15934	2.48711	3.09192	2.61415	3.82164	2.50377	3.81824	3.82164	2.61415	2.50377	3.81824	5885	2185	2532	5817	12.8497	5.09117	4.74554	13.2328
64770	NM_001308317,NM_022757	CCDC14	coiled-coil domain containing 14	1.03628	3.09203	2.24413	3.60262	1.21402	3.20327	1.17151	3.23001	-1.84851	3.76339	3.11784	3.06642	4.23258	3.34622	3.06642	3.11784	4.23258	3.34622	1968	2516	6307	2612	7.08699	7.69989	17.9002	9.33079
64787	NM_022772	EPS8L2	EPS8 like 2	2.39659	5.87081	1.00078	5.27464	3.18269	6.05185	1.32801	6.73659	3.18021	6.0525	6.53506	5.27408	5.2752	6.94433	5.27408	6.53506	5.2752	6.94433	7988	22465	9839	25021	38.4571	91.969	37.4147	119.807
66004	NM_023946,NM_177457,NM_177458,NM_177476,NM_177477	LYNX1	Ly6/neurotoxin 1	1.93806	1.58482	-1.02635	1.15891	2.72278	1.75765	1.4049	2.36499	2.79453	1.72943	2.13244	1.17783	1.1403	2.62291	1.17783	2.13244	1.1403	2.62291	339	1200	454	1635	1.16592	3.37782	1.18411	5.34814
79094	NM_001142776,NM_024111	CHAC1	ChaC glutathione specific gamma-glutamylcyclotransferase 1	1.29445	1.77775	1.92331	2.0187	2.40179	2.14205	1.85544	2.37809	1.24878	2.7004	1.97364	1.6013	2.54489	2.86541	1.6013	1.97364	2.54489	2.86541	233	420	759	801	1.90563	2.92975	4.91127	6.50989
79137	NM_001321109,NM_001321110,NM_024293	RETREG2	reticulophagy regulator family member 2	2.00404	3.99425	1.00986	3.53122	1.08058	3.57962	-1.85459	4.05712	1.07003	3.5868	4.52706	3.52415	3.53831	3.63596	3.52415	4.52706	3.53831	3.63596	3048	7868	4028	3450	10.254	21.8881	10.7647	11.6372
79139	NM_001134671,NM_001330601,NM_024295	DERL1	derlin 1	2.03345	4.38454	2.24646	4.44804	-1.08999	3.83971	-2.21643	4.31414	-2.44861	4.37662	4.9263	3.90237	5.07002	3.77806	3.90237	4.9263	5.07002	3.77806	3018	7572	9059	2835	13.7751	29.4547	32.6402	12.8726
79642	NM_024590	ARSJ	arylsulfatase family member J	-1.45834	2.26726	-1.27715	2.37268	-2.07784	1.95835	-1.4248	1.73733	-1.62693	1.8181	2.01137	2.5557	2.20276	1.50062	2.5557	2.01137	2.20276	1.50062	1440	1104	1442	608	4.65342	3.03392	3.68159	1.95215
79671	NM_001282143,NM_001282144,NM_001282358,NM_024618	NLRX1	NLR family member X1	1.38763	2.94812	-1.06494	2.67549	1.94105	3.16371	1.39882	3.42745	2.06709	3.11049	3.19389	2.72126	2.63049	3.67809	2.72126	3.19389	2.63049	3.67809	1385	2501	1771	3157	5.34534	8.16608	5.2843	11.9814
79718	NM_001321193,NM_001321194,NM_001321195,NM_024665	TBL1XR1	transducin beta like 1 X-linked receptor 1	-2.40265	2.23437	1.11902	3.03447	-1.21267	2.8119	1.98129	2.12658	-1.357	2.88808	1.68981	2.95443	3.11667	2.67625	2.95443	1.68981	3.11667	2.67625	3415	1403	5186	2968	6.4631	2.23473	7.74427	5.57548
79733	NM_001256371,NM_001256372,NM_024680	E2F8	E2F transcription factor 8	-1.65261	2.3663	-1.23676	2.59846	-2.45928	2.00467	-1.48812	1.72104	-1.98849	1.8899	2.03151	2.75626	2.44969	1.45802	2.75626	2.03151	2.44969	1.45802	1337	877	1389	453	5.50301	3.10088	4.52938	1.86494
79801	NM_001324318,NM_001324319,NM_024745,NR_136738	SHCBP1	SHC binding and spindle associated 1	-1.42568	4.5781	-1.07218	4.79053	-2.07725	4.28138	-1.45703	4.04881	-1.9374	4.23668	4.32942	4.84107	4.74052	3.78639	4.84107	4.32942	4.74052	3.78639	6034	4855	7041	2807	27.983	19.1396	25.8411	12.9404
79866	NM_001286746,NM_001286747,NM_024808	BORA	bora, aurora kinase A activator	-1.68187	2.56201	-1.15992	2.85533	-2.33137	2.27318	-1.38618	1.96466	-2.00994	2.18958	2.21428	2.96435	2.75032	1.74317	2.96435	2.21428	2.75032	1.74317	1257	823	1416	486	6.51464	3.62799	5.8148	2.4884
79968	NM_001167941,NM_024908	WDR76	WD repeat domain 76	-1.83394	2.68357	-1.19216	3.02703	-2.33827	2.46885	-1.275	2.09897	-1.96138	2.36761	2.28152	3.15647	2.90289	1.93103	3.15647	2.28152	2.90289	1.93103	2021	1205	2205	795	7.59299	3.84676	6.54834	2.97383
80119	NM_001286496,NM_001286497,NM_001286499,NM_025049	PIF1	PIF1 5'-to-3' DNA helicase	-2.14553	2.71728	-1.15132	3.21994	-6.6076	1.41095	-3.07971	1.1537	-5.73917	1.36712	2.22185	3.32319	3.1199	0.599059	3.32319	2.22185	3.1199	0.599059	1546	768	1704	103	8.71886	3.65779	7.76212	0.56804
80298	NM_001033050,NM_025198	MTERF2	mitochondrial transcription termination factor 2	-2.06585	2.18205	-1.02783	2.74743	-1.02055	2.75259	2.02424	2.17045	1.00713	2.73282	1.72057	2.7673	2.7277	2.73795	2.7673	1.72057	2.7277	2.73795	657	321	854	696	5.5441	2.30641	5.70259	5.85183
80329	NM_001317089,NM_025218,NR_133659	ULBP1	UL16 binding protein 1	1.11894	1.00299	1.80236	1.28152	2.11211	1.36161	1.88761	1.4761	1.17186	1.88602	1.08732	0.925193	1.77508	2.00388	0.925193	1.08732	1.77508	2.00388	208	299	647	673	0.828063	1.13414	2.41582	3.17619
80727	NM_025250	TTYH3	tweety family member 3	1.51886	5.10318	1.00642	4.8152	2.03816	5.29939	1.3419	5.62171	2.02517	5.30447	5.41358	4.81059	4.81981	5.83785	4.81059	5.41358	4.81981	5.83785	8696	15622	11037	17940	27.2712	41.6568	27.339	55.9553
80851	NM_001322462,NM_001322463,NM_001322464,NM_030645	SH3BP5L	SH3 binding domain protein 5 like	-1.62673	3.1388	-1.05646	3.4695	1.24216	3.66244	2.02066	3.27573	1.3123	3.62085	2.80738	3.50935	3.43011	3.82221	3.50935	2.80738	3.43011	3.82221	2160	1525	2659	2826	10.1348	6.00034	9.89416	13.2721
81567	NM_001145549,NM_030810	TXNDC5	thioredoxin domain containing 5	2.09879	5.8842	-1.11838	5.29235	2.08896	5.8811	-1.0047	6.43984	2.33625	5.79211	6.44323	5.37367	5.21226	6.43645	5.37367	6.44323	5.21226	6.43645	8108	20099	8986	16712	41.3261	87.1041	36.1886	84.713
81607	NM_030916	NECTIN4	nectin cell adhesion molecule 4	1.79879	0.608172	1.05406	0.353539	2.20511	0.680581	1.22589	1.30328	2.09201	0.757612	1.16462	0.317592	0.393554	1.45844	0.317592	1.16462	0.393554	1.45844	51	343	91	435	0.219724	1.25678	0.308467	1.86649
81610	NM_030919	FAM83D	family with sequence similarity 83 member D	-1.60425	5.2532	-1.09769	5.53757	-2.31841	4.9617	-1.44516	4.65011	-2.11209	4.90183	4.92331	5.60521	5.47074	4.39207	5.60521	4.92331	5.47074	4.39207	7875	5555	8791	3225	49.0298	29.4053	43.2285	19.9691
81611	NM_001136478,NM_001136479,NM_001280559,NM_001280560,NM_030920	ANP32E	acidic nuclear phosphoprotein 32 family member E	-1.44583	4.95703	1.10907	5.30425	-1.86165	4.76076	-1.2876	4.51218	-2.06469	4.82825	4.69821	5.23011	5.37945	4.33353	5.23011	4.69821	5.37945	4.33353	8450	6619	11687	4382	37.1247	24.7233	40.4593	19.1743
81831	NM_001201477,NM_018092	NETO2	neuropilin and tolloid like 2	-2.87662	4.63603	1.03582	5.48578	-1.12946	5.37192	2.54689	4.56086	-1.16992	5.39684	3.93608	5.46046	5.51123	5.28482	5.46046	3.93608	5.51123	5.28482	10783	4098	13775	9182	44.2381	14.2982	44.6379	37.4612
81930	NM_031217	KIF18A	kinesin family member 18A	-1.63802	3.76026	1.06529	4.17843	-2.85262	3.29117	-1.7415	2.99431	-3.03886	3.3273	3.4211	4.13306	4.2243	2.62077	4.13306	3.4211	4.2243	2.62077	3760	2607	5164	1231	16.4166	9.68001	17.8086	5.34254
83461	NM_001297602,NM_001297603,NM_001297604,NM_001331019,NM_031299,NR_123727,NR_138531	CDCA3	cell division cycle associated 3	-1.9566	4.46071	-1.15774	4.86428	-3.3709	3.99959	-1.72283	3.58896	-2.91161	3.91366	4.00274	4.97109	4.75977	3.21796	4.97109	4.00274	4.75977	3.21796	3599	2037	3911	1003	30.9165	14.9972	26.1936	8.52427
83463	NM_001142935,NM_031300	MXD3	MAX dimerization protein 3	-1.43104	2.92213	-1.11036	3.11565	-2.20823	2.55757	-1.5431	2.34128	-1.98876	2.49634	2.67502	3.19208	3.04106	2.04919	3.19208	2.67502	3.04106	2.04919	774	620	906	351	7.79488	5.36698	7.29592	3.29975
83540	NM_031423,NM_145697	NUF2	NUF2, NDC80 kinetochore complex component	-1.55106	4.23898	-1.04287	4.53704	-2.36466	3.89747	-1.52454	3.61721	-2.26744	3.87155	3.93416	4.56742	4.50686	3.32579	4.56742	3.93416	4.50686	3.32579	2946	2142	3557	1186	22.9634	14.2862	21.858	9.19616
83541	NM_001042353,NM_001289145,NM_001289146,NM_001289147,NM_031424,NM_207121	FAM110A	family with sequence similarity 110 member A	-1.69963	2.36668	-1.44394	2.50102	-2.08642	2.18606	-1.22757	1.86103	-1.44495	1.96666	2.0148	2.78002	2.25002	1.719	2.78002	2.0148	2.25002	1.719	673	432	589	296	5.60556	3.04316	3.82744	2.43653
83667	NM_031459	SESN2	sestrin 2	2.01045	2.84614	1.13176	2.47429	3.29367	3.13053	1.63827	3.73328	2.91023	3.24553	3.39414	2.38662	2.56518	4.10631	2.38662	3.39414	2.56518	4.10631	936	2601	1477	3830	4.01145	9.47803	4.99766	16.3262
83693	NM_001146051,NM_031463	HSDL1	hydroxysteroid dehydrogenase like 1	-1.09517	2.22348	2.64814	2.90889	-1.14677	2.189	-1.04712	2.1254	-3.03682	2.78057	2.15887	2.29002	3.695	2.09244	2.29002	2.15887	3.695	2.09244	885	980	3705	832	3.66338	3.44951	12.0783	3.4088
83719	NM_001145524,NM_031477	YPEL3	yippee like 3	2.0354	1.93219	-1.16212	1.37373	3.37446	2.19486	1.65788	2.85316	3.92153	2.02852	2.5117	1.48638	1.26962	3.24104	1.48638	2.5117	1.26962	3.24104	147	430	154	723	1.68872	4.66247	1.39586	8.6602
83959	NM_001174089,NM_001174090,NM_032034,NR_135000	SLC4A11	solute carrier family 4 member 11	1.72837	2.28161	-1.01338	1.91118	2.40755	2.47471	1.39296	2.93957	2.43975	2.46233	2.7102	1.92079	1.90162	3.18836	1.92079	2.7102	1.90162	3.18836	539	1351	718	1730	2.62018	5.54475	2.75858	8.34821
84280	NM_001297741,NM_001297742,NM_032320	BTBD10	BTB domain containing 10	2.1061	4.15022	-1.00996	3.64041	1.39986	3.88264	-1.5045	4.41768	1.4138	3.87502	4.72214	3.64757	3.63327	4.13285	3.64757	4.72214	3.63327	4.13285	1840	4822	2376	2731	11.2865	25.2537	11.526	16.6655
84284	NM_001329452,NM_001329453,NM_032324,NR_138024,NR_138025,NR_138026,NR_138027,NR_138028	NTPCR	nucleoside-triphosphatase, cancer-related	1.73773	5.50765	1.06551	5.16902	2.03335	5.61208	1.17012	6.03292	1.90834	5.66199	5.92066	5.12345	5.21499	6.14731	5.12345	5.92066	5.21499	6.14731	2947	6049	3933	5992	34.3505	59.9416	36.2382	69.3307
84317	NM_001321118,NM_001321119,NM_032357,NR_104471,NR_135548	CCDC115	coiled-coil domain containing 115	-2.17562	3.02707	1.07198	3.68907	1.16179	3.74589	2.52762	3.11575	1.08378	3.79715	2.51785	3.63928	3.73955	3.85563	3.63928	2.51785	3.73955	3.85563	1405	703	1984	1720	11.2112	4.67772	12.4849	13.6526
84552	NM_032510	PARD6G	par-6 family cell polarity regulator gamma	1.55406	1.66459	-1.03591	1.35098	2.143	1.84636	1.37896	2.23251	2.21996	1.8119	2.01272	1.37667	1.32576	2.4763	1.37667	2.01272	1.32576	2.4763	375	906	479	1213	1.47897	3.03848	1.49083	4.75744
84650	NM_001278636,NM_032565,NR_103802,NR_103803	EBPL	emopamil binding protein like	-1.05337	5.23549	-1.03387	5.24905	-2.44607	4.5827	-2.32213	4.54998	-2.36594	4.56177	5.19811	5.27313	5.22507	3.98266	5.27313	5.19811	5.22507	3.98266	2477	2718	2983	960	38.4099	35.7253	36.3863	14.9701
84722	NM_001005290,NM_001032291,NM_001350237,NM_001350238,NM_001350239,NM_001350240,NM_001350241,NM_001350242,NM_032636	PSRC1	proline and serine rich coiled-coil 1	-1.82876	3.40636	-1.0933	3.80463	-3.07476	2.95004	-1.68133	2.59694	-2.81236	2.90056	2.99865	3.86952	3.74082	2.24904	3.86952	2.99865	3.74082	2.24904	1603	972	1904	459	13.4144	6.99735	12.4916	3.91585
84842	NM_032756	HPDL	4-hydroxyphenylpyruvate dioxygenase like	-1.45365	1.2041	-1.43904	1.21317	-2.081	0.819442	-1.43157	0.656128	-1.44611	0.661069	0.964122	1.5038	0.978698	0.446525	1.5038	0.964122	0.978698	0.446525	206	134	145	48	1.72658	0.953597	0.956092	0.40063
84904	NM_032818	ARHGEF39	Rho guanine nucleotide exchange factor 39	-1.63813	2.92676	-1.1701	3.18903	-2.67039	2.49727	-1.63014	2.2119	-2.28219	2.41011	2.59231	3.30436	3.07773	1.88731	3.30436	2.59231	3.07773	1.88731	2139	1456	2366	715	8.59398	4.97259	7.50728	2.85416
84908	NM_001329752,NM_001329753,NM_001329755,NM_001329757,NM_001329758,NM_032822	FAM136A	family with sequence similarity 136 member A	-1.08585	6.22959	1.04934	6.32393	-3.53681	5.3003	-3.25719	5.25	-3.7113	5.3295	6.17046	6.28929	6.35876	4.46684	6.28929	6.17046	6.35876	4.46684	9921	10558	12495	2688	78.6021	71.403	79.0848	20.9345
84981	NR_028502,NR_028503,NR_028504,NR_028505	MIR22HG	MIR22 host gene	1.05945	3.28974	1.59829	3.57062	2.03265	3.72505	1.91859	3.77251	1.27176	4.09462	3.33166	3.24834	3.92487	4.2717	3.24834	3.33166	3.92487	4.2717	1326	1722	2916	3024	8.21413	9.0351	14.2383	18.3198
85409	NM_001271082,NM_033120	NKD2	naked cuticle homolog 2	1.28075	2.59707	-1.09265	2.35992	2.13825	2.92193	1.66953	3.12965	2.33636	2.84387	2.78169	2.4247	2.29687	3.52113	2.4247	2.78169	2.29687	3.52113	530	891	656	1359	4.14408	5.86322	3.98701	10.6168
89839	NM_001039841	ARHGAP11B	Rho GTPase activating protein 11B	-1.71274	2.46124	1.06035	2.92177	-1.93862	2.35436	-1.13188	2.01216	-2.05561	2.38867	2.10351	2.87981	2.96435	1.92478	2.87981	2.10351	2.96435	1.92478	410	261	585	200	6.08879	3.29989	6.86672	2.95549
89958	NM_178448	SAPCD2	suppressor APC domain containing 2	-2.44697	3.30403	-1.19523	3.88122	-4.97303	2.60995	-2.03232	2.1494	-4.16075	2.52488	2.721	4.012	3.75471	1.69787	4.012	2.721	3.75471	1.69787	3784	1666	4044	607	14.9291	5.5886	12.6018	2.38169
90120	NM_001256526,NM_152833,NR_134506	TMEM250	transmembrane protein 250	3.12026	2.88974	1.11441	2.26002	1.82419	2.58068	-1.71049	3.41581	1.63691	2.67145	3.82489	2.18323	2.33951	3.05048	2.18323	3.82489	2.33951	3.05048	583	2898	901	1289	3.33146	13.2335	4.13855	7.51451
90381	NM_001308025,NM_152259	TICRR	TOPBP1 interacting checkpoint and replication regulator	-1.42262	2.62141	-1.14805	2.78662	-2.27058	2.21897	-1.59605	2.01414	-1.97777	2.14108	2.37944	2.88799	2.6888	1.70493	2.88799	2.37944	2.6888	1.70493	2706	2170	3092	1064	6.1339	4.18379	5.53654	2.39623
90416	NM_001080791,NM_001080792,NM_001289132,NM_052849	C15orf57	chromosome 15 open reading frame 57	1.13776	2.82466	-2.01534	2.16947	1.02399	2.75015	-1.1111	2.84228	2.0637	2.183	2.9193	2.7331	1.72207	2.7673	2.7331	2.9193	1.72207	2.7673	617	877	331	687	5.39916	6.55015	2.2894	5.98221
90417	NM_001142761,NM_001142762,NM_033286	KNSTRN	kinetochore localized astrin/SPAG5 binding protein	-1.6261	4.6511	-1.06085	4.97222	-2.99073	4.1502	-1.83921	3.84904	-2.81918	4.11478	4.3136	5.01501	4.92979	3.43451	5.01501	4.3136	4.92979	3.43451	3719	2594	4368	1182	31.9566	18.9549	29.487	10.0018
91137	NM_001303249,NM_001303250,NM_138773,NR_138151	SLC25A46	solute carrier family 25 member 46	2.11383	3.08056	2.12215	3.08294	-1.09776	2.51941	-2.32048	2.99939	-2.32962	3.0017	3.66744	2.58759	3.67311	2.45302	2.58759	3.66744	3.67311	2.45302	1524	4349	4761	1475	4.79543	11.6668	11.8692	4.67827
91754	NM_001329237,NM_001329238,NM_033116	NEK9	NIMA related kinase 9	1.93408	3.48272	2.19825	3.5624	2.4776	3.63527	1.28102	4.16571	1.12708	4.26102	3.9909	3.03924	4.1756	4.34819	3.03924	3.9909	4.1756	4.34819	2845	7239	8984	8073	6.92099	14.8635	17.1652	19.3843
93129	NM_152288	ORAI3	ORAI calcium release-activated calcium modulator 3	1.59905	3.22043	1.14703	2.9969	2.35968	3.46395	1.47568	3.84725	2.05721	3.58021	3.57679	2.89958	3.09748	4.13817	2.89958	3.57679	3.09748	4.13817	896	1857	1398	2436	6.18775	10.9082	7.62936	16.7413
93611	NM_001014765,NM_001304790,NM_001304791,NM_001330355,NM_033182,NM_183412,NM_183413,NR_130909	FBXO44	F-box protein 44	1.26003	3.47563	-1.08661	3.25243	1.87961	3.74051	1.49171	3.92425	2.04239	3.67224	3.64636	3.31289	3.19306	4.22332	3.31289	3.64636	3.19306	4.22332	1678	2653	2072	3517	8.65512	11.4847	8.25012	17.709
94163	NR_001457	SNORD38B	small nucleolar RNA, C/D box 38B	-1.76478	2.6176	-1.81531	2.5937	-2.57224	2.27795	-1.45754	1.94911	-1.41697	1.93131	2.23973	3.05923	2.19901	1.6962	3.05923	2.23973	2.19901	1.6962	33	20	22	11	7.03308	3.71615	3.67306	2.37615
94241	NM_001135733,NM_033285	TP53INP1	tumor protein p53 inducible nuclear protein 1	3.26634	2.62337	1.19774	2.03098	6.62352	2.97069	2.02781	4.09096	5.53003	3.16716	3.61266	1.90499	2.1653	4.63259	1.90499	3.61266	2.1653	4.63259	963	4914	1679	8786	2.57868	11.2119	3.55376	23.4544
114757	NM_134268	CYGB	cytoglobin	1.90462	1.05928	1.05692	0.730848	2.29816	1.14438	1.20663	1.75176	2.17439	1.20862	1.6215	0.692002	0.771874	1.89248	0.692002	1.6215	0.771874	1.89248	81	353	127	413	0.564504	2.09166	0.698885	2.86505
114882	NM_001003712,NM_001319652,NM_001319653,NM_001319655,NM_020841	OSBPL8	oxysterol binding protein like 8	2.0618	2.49547	2.44316	2.59303	2.08805	2.50287	1.01273	3.08053	-1.17007	3.20097	3.07142	2.02752	3.31627	3.08967	2.02752	3.07142	3.31627	3.08967	1383	4161	5511	3720	2.89302	7.40754	9.1131	7.75672
116372	NM_001077427,NM_001321234,NM_001321235,NM_144586	LYPD1	LY6/PLAUR domain containing 1	2.51795	2.56768	-1.0345	1.96193	-1.47162	1.68495	-3.70548	2.17785	-1.42254	1.66407	3.3188	1.98655	1.93761	1.42914	1.98655	3.3188	1.93761	1.42914	666	2514	859	436	2.78436	8.95241	2.83514	1.80598
121053	NM_152318	C12orf45	chromosome 12 open reading frame 45	1.43439	4.98797	-1.16088	4.62567	1.87475	5.16804	1.30701	5.44468	2.17636	5.04921	5.25497	4.73453	4.51932	5.64123	4.73453	5.25497	4.51932	5.64123	1069	1795	1154	1985	25.9759	37.101	22.1428	47.9875
124222	NM_001284511,NM_001284512,NM_001284513,NM_001324118,NM_152341	PAQR4	progestin and adipoQ receptor family member 4	-1.72723	3.80103	-1.33834	3.99991	-2.10096	3.64095	-1.21638	3.28286	-1.56982	3.45462	3.42719	4.21565	3.7952	3.1446	4.21565	3.42719	3.7952	3.1446	3199	1971	3028	1484	17.4336	9.71724	13.0207	8.06254
124995	NM_145255,NM_148887,NR_037575	MRPL10	mitochondrial ribosomal protein L10	-1.01075	5.71428	-1.03559	5.69671	-2.68944	4.95724	-2.66084	4.95056	-2.597	4.93534	5.70658	5.722	5.67154	4.2947	5.722	5.70658	5.67154	4.2947	6155	7096	7378	2203	52.5629	51.3854	49.6245	18.5873
126820	NM_001288563,NM_145172	WDR63	WD repeat domain 63	2.31116	0.952405	1.05803	0.562857	3.68019	1.12184	1.59236	2.04043	3.47836	1.20586	1.73226	0.523639	0.605013	2.40342	0.523639	1.73226	0.605013	2.40342	80	545	128	897	0.401381	2.33814	0.509959	4.4808
127544	NM_001127361,NM_001300826,NM_153341	RNF19B	ring finger protein 19B	1.16443	3.75533	-1.39866	3.39649	1.91028	4.08744	1.64053	4.2087	2.67184	3.80654	3.86674	3.64712	3.16307	4.58091	3.64712	3.86674	3.16307	4.58091	2013	2860	1825	4060	11.2837	13.575	8.04058	22.6272
127707	NM_152375	KLHDC7A	kelch domain containing 7A	1.91368	1.7188	-1.07235	1.26185	2.14355	1.78022	1.12012	2.32999	2.29865	1.71055	2.24959	1.31324	1.21246	2.41325	1.31324	2.24959	1.21246	2.41325	461	1475	549	1522	1.3761	3.74843	1.2952	4.52405
132671	NM_001297608,NM_001346102,NM_001346103,NM_145263,NR_123728,NR_144359	SPATA18	spermatogenesis associated 18	1.87047	1.52033	1.12411	1.21578	2.21514	1.60878	1.18427	2.15626	1.97057	1.72432	2.03771	1.13431	1.30309	2.28171	1.13431	2.03771	1.30309	2.28171	318	1044	530	1149	1.10265	3.11543	1.45423	4.03339
134147	NM_138809	CMBL	carboxymethylenebutenolidase homolog	1.73101	3.17837	-1.00653	2.80242	2.33508	3.36368	1.34897	3.80854	2.35032	3.35804	3.59873	2.80712	2.79772	4.03058	2.80712	3.59873	2.79772	4.03058	1528	3492	2047	4185	5.70763	11.0935	6.04067	15.5496
142678	NM_001170686,NM_001170687,NM_001170688,NM_001170689,NM_080875,NR_033183,NR_146324	MIB2	mindbomb E3 ubiquitin protein ligase 2	1.41864	2.66468	-1.00901	2.41786	2.10548	2.91231	1.48415	3.20102	2.12445	2.90453	2.92885	2.42434	2.4114	3.49849	2.42434	2.92885	2.4114	3.49849	760	1488	993	2011	4.14393	6.59967	4.37767	10.4685
144811	NM_001128303,NM_001350638,NM_001350639,NM_001350640,NM_001350641,NM_001350642,NM_001350643,NM_001350644,NM_001350645,NM_001350646,NM_001350647,NM_001350648,NM_153218	LACC1	laccase domain containing 1	1.83051	1.89439	1.02612	1.52631	2.90807	2.14375	1.58866	2.69336	2.83404	2.17003	2.38007	1.50782	1.54502	3.04788	1.50782	2.38007	1.54502	3.04788	488	1341	681	2062	1.73338	4.18525	1.90299	7.49929
144983	NM_001011724,NM_001011725	HNRNPA1L2	heterogeneous nuclear ribonucleoprotein A1-like 2	-1.02655	2.24875	2.6439	2.88505	-1.02767	2.24796	-1.00109	2.22915	-2.71705	2.85989	2.22993	2.26773	3.6704	2.22836	2.26773	2.22993	3.6704	2.22836	544	656	2245	593	3.59597	3.67929	11.8467	3.85467
146198	NM_001305203,NM_001305204,NM_001305206,NM_001305207,NM_001305208,NM_133458,NR_130976,NR_130977,NR_130978	ZFP90	ZFP90 zinc finger protein	1.44276	2.8979	1.37669	2.86686	2.22787	3.17114	1.54418	3.47366	1.61829	3.43646	3.17435	2.64552	3.10672	3.80119	2.64552	3.17435	3.10672	3.80119	1557	2878	2955	4027	5.01361	8.03954	7.6867	13.0883
146760	NM_178568	RTN4RL1	reticulon 4 receptor like 1	1.64191	1.28812	-1.0491	0.943964	1.98253	1.38764	1.20745	1.82547	2.07987	1.33775	1.69455	0.979173	0.91002	1.96651	0.979173	1.69455	0.91002	1.96651	216	634	264	741	0.899882	2.24648	0.86873	3.07194
146909	NM_001264573,NM_001265577	KIF18B	kinesin family member 18B	-1.68065	4.45784	-1.21454	4.70576	-2.93522	3.99654	-1.74648	3.67486	-2.41674	3.87924	4.09903	4.84805	4.56765	3.29458	4.84805	4.09903	4.56765	3.29458	7935	5357	8196	2556	28.1525	16.1784	23.0101	9.00031
149175	NM_001031740,NM_001113482,NM_152496	MANEAL	mannosidase endo-alpha like	-1.17297	3.34091	-1.14266	3.3604	-2.63458	2.66924	-2.24608	2.57888	-2.30566	2.59392	3.22781	3.45798	3.26559	2.06041	3.45798	3.22781	3.26559	2.06041	1761	1808	2007	595	9.68618	8.36094	8.72639	3.32823
149478	NM_001136537	BTBD19	BTB domain containing 19	1.38778	0.876041	1.07599	0.721887	2.04094	1.06809	1.47066	1.39451	1.89681	1.14912	1.14376	0.670986	0.776649	1.70022	0.670986	1.14376	0.776649	1.70022	57	150	93	250	0.538997	1.22169	0.702891	2.38746
150468	NM_001304361,NM_152515,NR_130712	CKAP2L	cytoskeleton associated protein 2 like	-1.43892	3.42184	-1.0881	3.63297	-2.23509	3.0597	-1.55332	2.83398	-2.05413	3.00883	3.1694	3.69438	3.57258	2.53405	3.69438	3.1694	3.57258	2.53405	3671	2986	4406	1591	11.6932	8.01568	11.0664	4.99781
151230	NM_144711	KLHL23	kelch like family member 23	-2.52127	1.8719	-1.11489	2.57464	-2.49814	1.8813	1.00926	1.32677	-2.24071	1.82485	1.32014	2.65429	2.49738	1.33343	2.65429	1.32014	2.49738	1.33343	1361	478	1613	447	5.05063	1.50552	4.72617	1.6493
151246	NM_001160033,NM_001160046,NM_152524	SGO2	shugoshin 2	-1.7784	3.25147	1.00905	3.69966	-3.26487	2.70835	-1.83585	2.38443	-3.2944	2.71311	2.86259	3.69317	3.70616	1.98615	3.69317	2.86259	3.70616	1.98615	3492	2212	4604	946	11.676	6.2618	12.1857	3.12708
157313	NM_001317906,NM_001317907,NM_152562	CDCA2	cell division cycle associated 2	-1.64408	3.97179	-1.0664	4.29997	-2.59513	3.59344	-1.57847	3.28358	-2.43354	3.55489	3.62931	4.34659	4.25384	2.97078	4.34659	3.62931	4.25384	2.97078	4862	3354	5824	1786	19.2345	11.3393	18.174	7.07267
157638	NM_174911	FAM84B	family with sequence similarity 84 member B	1.66394	1.35765	1.1774	1.15095	2.74312	1.61017	1.64856	2.10368	2.3298	1.78339	1.77376	1.03915	1.27476	2.49497	1.03915	1.77376	1.27476	2.49497	357	1035	646	1762	0.984912	2.42606	1.4066	4.83265
196513	NM_001319292,NM_152640,NR_135060	DCP1B	decapping mRNA 1B	1.51373	2.97497	1.01769	2.70352	2.23146	3.21823	1.47415	3.55796	2.19268	3.23332	3.28901	2.69091	2.7162	3.84889	2.69091	3.28901	2.7162	3.84889	736	1445	1007	1918	5.22599	8.73734	5.64735	13.5786
201229	NM_001076680	LYRM9	LYR motif containing 9	1.26291	1.53382	1.01108	1.38259	2.0626	1.82359	1.63322	2.03473	2.03999	1.83411	1.71141	1.37466	1.39056	2.41913	1.37466	1.71141	1.39056	2.41913	145	263	199	448	1.47447	2.28257	1.60124	4.54635
201562	NM_001329783,NM_001329784,NM_001329786,NM_001329787,NM_198402	HACD2	3-hydroxyacyl-CoA dehydratase 2	3.09839	3.72366	4.19773	3.89593	3.11947	3.72759	1.0068	4.63262	-1.34566	4.84694	4.62773	2.99621	5.06582	4.63751	2.99621	4.62773	5.06582	4.63751	1879	7759	11622	6635	6.69261	23.4644	32.5591	23.5617
220001	NM_152718	VWCE	von Willebrand factor C and EGF domains	1.72118	0.472071	1.03636	0.246133	2.18488	0.546951	1.26941	1.16455	2.10823	0.607183	1.00512	0.221717	0.273238	1.34927	0.221717	1.00512	0.273238	1.34927	35	278	61	395	0.148166	1.00857	0.20504	1.67617
256949	NM_198471	KANK3	KN motif and ankyrin repeat domains 3	2.38317	1.53284	1.0635	1.07296	3.36248	1.69141	1.41093	2.51846	3.16171	1.76287	2.28235	1.02946	1.11828	2.77899	1.02946	2.28235	1.11828	2.77899	179	835	268	1121	0.969795	3.8481	1.14838	6.04518
257415	NM_001040057,NM_001288584,NM_152789,NR_109929	FAM133B	family with sequence similarity 133 member B	-1.026	2.10936	1.23285	2.27395	2.16517	2.62675	2.22147	2.60379	1.75623	2.80696	2.09093	2.12796	2.42996	3.24244	2.12796	2.09093	2.42996	3.24244	507	611	890	1368	3.17132	3.25854	4.43264	8.66416
259266	NM_001206846,NM_018136	ASPM	abnormal spindle microtubule assembly	-1.8231	3.27044	1.05972	3.77381	-3.27959	2.74484	-1.7989	2.40524	-3.47543	2.77544	2.86581	3.7322	3.81588	2.01869	3.7322	2.86581	3.81588	2.01869	7821	4742	10786	2118	12.0215	6.27755	13.1935	3.21878
282991	NM_001001342,NM_001282436,NM_001282437,NM_001282438,NM_001282439,NM_173809	BLOC1S2	biogenesis of lysosomal organelles complex 1 subunit 2	1.63242	3.86797	1.03068	3.55231	2.12799	4.03876	1.30358	4.4247	2.06465	4.06361	4.23759	3.53058	3.57417	4.62007	3.53058	4.23759	3.57417	4.62007	1839	3737	2505	4168	10.3055	17.8636	11.0774	23.2182
283131	NR_028272,NR_131012	NEAT1	nuclear paraspeckle assembly transcript 1 (non-protein coding)	1.44061	7.34916	1.5111	7.38233	2.00324	7.57514	1.39055	7.85144	1.32568	7.88688	7.61721	7.09053	7.68614	8.09287	7.09053	7.61721	7.68614	8.09287	36018	60882	67108	72321	139.123	199.254	199.162	275.477
283431	NM_001303130,NM_001303131,NM_174942	GAS2L3	growth arrest specific 2 like 3	-1.62443	1.76515	1.30129	2.33172	-2.11377	1.51631	-1.30124	1.24519	-2.75064	1.64487	1.44954	2.14947	2.52942	1.06966	2.14947	1.44954	2.52942	1.06966	1208	769	2295	449	3.23142	1.75137	4.85648	1.19576
284040	NM_001204477	CDRT4	CMT1A duplicated region transcript 4	-1.05298	2.47883	-2.64124	1.67513	-4.46555	0.94848	-4.24088	0.934339	-1.6907	0.631402	2.44187	2.51635	1.11513	0.357508	2.51635	2.44187	1.11513	0.357508	743	859	240	52	4.49581	4.4216	1.1442	0.309554
340485	NM_001010887	ACER2	alkaline ceramidase 2	1.87445	1.6154	1.0223	1.24035	2.637	1.79235	1.40681	2.36444	2.57948	1.81549	2.13101	1.22454	1.25636	2.62344	1.22454	2.13101	1.25636	2.62344	233	749	328	1015	1.23036	3.37588	1.37248	5.34986
340526	NM_001024455	RTL5	retrotransposon Gag like 5	1.54788	2.10379	1.03984	1.84008	2.56054	2.39621	1.65423	2.78189	2.46245	2.43318	2.44241	1.81211	1.86847	3.16856	1.81211	2.44241	1.86847	3.16856	678	1493	963	2376	2.36224	4.42524	2.64996	8.23459
348110	NM_001282380,NM_182616	ARPIN	actin related protein 2/3 complex inhibitor	-1.06617	3.17876	-4.26778	1.91063	1.10039	3.2936	1.17319	3.24606	4.6962	1.95108	3.13288	3.22532	1.13183	3.36332	3.22532	3.13288	1.13183	3.36332	3251	3747	611	3872	8.05459	7.7796	1.16929	9.47096
374393	NM_001142703,NM_001142704,NM_198947	FAM111B	family with sequence similarity 111 member B	-1.58688	2.94926	-1.3172	3.096	-2.77068	2.45843	-1.74599	2.1964	-2.10346	2.30568	2.63491	3.30111	2.90363	1.83087	3.30111	2.63491	2.90363	1.83087	1993	1423	1937	634	8.56586	5.18386	6.55299	2.70541
401152	NM_001001701,NM_001170330	C4orf3	chromosome 4 open reading frame 3	-1.84717	3.27068	1.03079	3.76497	1.09063	3.80523	2.01459	3.32491	1.05805	3.8274	2.85784	3.74316	3.78691	3.86832	3.74316	2.85784	3.78691	3.86832	2276	1379	3078	2600	12.1231	6.24533	12.9462	13.7733
401630	NR_002161,NR_002161_dup1	FAM224A	family with sequence similarity 224 member A (non-protein coding)	1.07109	1.30371	-2.00432	0.562397	1.3109	1.43719	1.22389	1.49283	2.62746	0.64398	1.35419	1.25511	0.252001	1.64567	1.25511	1.35419	0.252001	1.64567	39	57	8	70	1.27117	1.56831	0.187258	2.26681
404093	NM_001271875,NM_001292025	CUEDC1	CUE domain containing 1	1.12297	4.83358	-2.11694	4.17475	-1.73998	4.33273	-1.95394	4.40837	1.21665	3.8075	4.91797	4.75065	3.66867	3.95158	4.75065	4.91797	3.66867	3.95158	6332	8393	3588	3634	26.2201	29.261	11.8339	14.639
404734	NM_020690	ANKHD1-EIF4EBP3	ANKHD1-EIF4EBP3 readthrough	1.1564	2.0352	2.79027	2.56876	3.09844	2.62501	2.67939	2.76369	1.11045	3.48824	2.14272	1.93308	3.41348	3.56462	1.93308	2.14272	3.41348	3.56462	1465	2213	6811	6091	2.65307	3.40749	9.74332	10.9726
406886	NR_029481	MIRLET7D	microRNA let-7d	-1.62889	1.92235	-2.15125	1.66432	-2.44714	1.53009	-1.50233	1.2754	-1.13754	1.10421	1.60236	2.30625	1.20107	1.01515	2.30625	1.60236	1.20107	1.01515	22	14	10	7	3.71922	2.05462	1.27644	1.10744
407013	NR_029497	MIR24-2	microRNA 24-2	1.05982	1.04733	1.06553	1.05105	-2.0085	0.0118049	-2.12865	0.0122868	-2.14012	0.0123304	1.09008	1.00626	1.09783	0.00013849	1.00626	1.09008	1.09783	0.00013849	5	7	7	1	0.94122	1.13712	1.1203	0.000122
407043	NR_029605	MIR7-1	microRNA 7-1	-1.45937	1.64133	-1.69193	1.51025	-2.42711	1.12818	-1.66312	0.956219	-1.43452	0.879854	1.39115	1.9365	1.17783	0.657263	1.9365	1.39115	1.17783	0.657263	20	15	12	5	2.65843	1.63659	1.23318	0.634915
552900	NM_001031827,NM_001031827_dup1,NM_001320579,NM_001320579_dup1,NR_135304,NR_135304_dup1	BOLA2	bolA family member 2	-1.01399	3.22153	1.93213	3.67609	2.14432	3.74158	2.17431	3.72996	1.10982	4.25626	3.21153	3.23157	4.18176	4.33209	3.23157	3.21153	4.18176	4.33209	515	617	1436	1274	8.10606	8.27726	17.2388	19.1688
554282	NM_001287385,NM_001287385_dup1,NM_001346067,NM_001346068,NM_001346070,NM_001346071,NR_144349	FAM72C	family with sequence similarity 72 member C	-1.46079	2.79598	1.01208	3.09134	-2.46791	2.34208	-1.68943	2.12426	-2.49773	2.34866	2.53594	3.08269	3.10002	1.7794	3.08269	2.53594	3.10002	1.7794	975	766	1290	368	7.17475	4.7433	7.6452	2.58909
595099	NR_002442	SNORD18B	small nucleolar RNA, C/D box 18B	-1.30817	1.25778	-1.08457	1.40661	-2.17192	0.713756	-1.66028	0.612215	-2.00257	0.684659	1.07884	1.46639	1.34927	0.347416	1.46639	1.07884	1.34927	0.347416	8	7	9	2	1.65133	1.11856	1.52561	0.297828
619505	NR_002576	SNORA21	small nucleolar RNA, H/ACA box 21	-1.727	2.05634	-1.92287	1.96034	-2.24308	1.81385	-1.29883	1.49921	-1.16653	1.42922	1.69964	2.4879	1.54464	1.32242	2.4879	1.69964	1.54464	1.32242	39	24	22	15	4.37714	2.25244	1.9029	1.62462
642799	NM_001277324,NM_001277324_dup1	NPIPA2	nuclear pore complex interacting protein family member A2	1.01761	1.49225	1.83652	1.86741	-1.09252	1.41444	-1.11176	1.42643	-2.00644	1.78504	1.50489	1.47971	2.35669	1.35205	1.47971	1.50489	2.35669	1.35205	121	157	382	122	1.67683	1.84862	4.19335	1.68094
642938	NM_001039762	FAM196A	family with sequence similarity 196 member A	1.32143	0.630633	-1.08914	0.394481	1.89744	0.798901	1.4359	1.09321	2.06658	0.683839	0.862956	0.460856	0.337665	1.38491	0.460856	0.862956	0.337665	1.38491	100	283	96	510	0.342972	0.82517	0.259463	1.73963
643401	NR_038848	LINC01021	long intergenic non-protein coding RNA 1021	2.05984	2.89712	1.06053	2.4644	2.34941	2.9754	1.14058	3.55852	2.21532	3.02701	3.4649	2.42237	2.50715	3.65467	2.42237	3.4649	2.50715	3.65467	303	862	441	867	4.13104	10.0106	4.75368	11.7834
650669	NR_044995	GAS6-AS1	GAS6 antisense RNA 1	2.27329	1.51961	-1.10519	0.963765	3.32541	1.69681	1.46282	2.48265	3.6752	1.57454	2.22339	1.03861	0.894316	2.77214	1.03861	2.22339	0.894316	2.77214	59	255	64	358	0.983997	3.66253	0.849544	6.01106
653381	NR_146393,NR_146394	SORD2P	sorbitol dehydrogenase 2, pseudogene	-1.38521	1.25672	1.95172	1.93677	-1.35433	1.27616	1.0228	1.0596	-2.64327	1.63298	1.04346	1.51356	2.47831	1.07599	1.51356	1.04346	2.47831	1.07599	315	227	1064	219	1.74342	1.06812	4.65328	1.20454
653583	NM_198850	PHLDB3	pleckstrin homology like domain family B member 3	1.69358	2.27571	1.02628	1.9458	2.16579	2.42129	1.27882	2.85917	2.11034	2.44468	2.68726	1.92718	1.9646	3.04207	1.92718	2.68726	1.9646	3.04207	435	1048	608	1236	2.64032	5.41263	2.91694	7.4632
653820	NM_001100910,NM_001320149	FAM72B	family with sequence similarity 72 member B	-1.43322	2.54294	1.09927	2.88325	-2.33523	2.1174	-1.62936	1.91222	-2.56704	2.16813	2.29653	2.81579	2.95233	1.59222	2.81579	2.29653	2.95233	1.59222	872	703	1314	339	5.76054	3.89949	6.80336	2.14758
654364	NM_001018136,NR_037149	NME1-NME2	NME1-NME2 readthrough	-2.54343	2.24817	-1.09373	2.9549	-1.9167	2.50738	1.32698	1.86641	-1.75244	2.45314	1.67346	3.02024	2.89098	2.08161	3.02024	1.67346	2.89098	2.08161	495	198	590	274	6.83237	2.19854	6.48649	3.38542
677768	NR_003002	SCARNA13	small Cajal body-specific RNA 13	1.01451	0.0868545	2.47115	0.326414	1.76642	0.263082	1.74116	0.296439	-1.39895	1.11407	0.0978673	0.077081	1.38226	0.897913	0.077081	0.0978673	1.38226	0.897913	1	2	37	18	0.049715	0.071297	1.58942	0.931389
677826	NR_002977	SNORA3B	small nucleolar RNA, H/ACA box 3B	-1.34567	2.30639	-2.12177	1.91234	-2.03332	1.95256	-1.51101	1.77965	1.0435	1.4756	2.10215	2.53047	1.44521	1.50663	2.53047	2.10215	1.44521	1.50663	40	34	19	18	4.55369	3.29661	1.70716	1.9643
677839	NR_003017	SNORA71C	small nucleolar RNA, H/ACA box 71C	-1.66381	1.65765	-1.1676	1.95012	-2.04503	1.46054	-1.22912	1.17238	-1.75148	1.37923	1.3306	2.06509	1.84155	1.03297	2.06509	1.3306	1.84155	1.03297	28	17	30	11	2.99248	1.5241	2.59582	1.14275
677850	NR_004397	SNORD1C	small nucleolar RNA, C/D box 1C	1.43824	1.70146	1.77366	1.82656	2.09616	1.92043	1.45745	2.23898	1.18182	2.40361	1.98369	1.45939	2.28612	2.52713	1.45939	1.98369	2.28612	2.52713	9	19	27	27	1.63957	2.95532	3.95447	4.96628
692093	NR_003050,NR_003050_dup1	SNORD62B	small nucleolar RNA, C/D box 62B	1.36905	1.54838	1.33602	1.53308	-1.57949	0.953136	-2.1624	1.10277	-2.11023	1.09187	1.79146	1.33829	1.75623	0.678829	1.33829	1.79146	1.75623	0.678829	9	17	18	4	1.41396	2.47215	2.36118	0.658745
692108	NR_003056	SNORD67	small nucleolar RNA, C/D box 67	-1.78642	1.32752	-1.16059	1.69965	-2.06441	1.17666	-1.15561	0.862781	-1.77876	1.10464	0.973394	1.81047	1.59561	0.764738	1.81047	0.973394	1.59561	0.764738	18	9	19	6	2.35795	0.969206	2.00197	0.755925
692110	NR_003058	SNORD70	small nucleolar RNA, C/D box 70	-2.13423	0.244576	-1.63293	0.70882	-1.69088	0.666911	1.2622	0.142341	-1.03549	0.412527	0.0522007	1.14591	0.43845	0.388137	1.14591	0.0522007	0.43845	0.388137	7	1	3	2	1.11789	0.037616	0.344042	0.336749
693174	NR_030318	MIR589	microRNA 589	1.60819	1.23788	-1.24721	0.765972	-1.33262	0.704787	-2.1431	0.926427	-1.06848	0.573253	1.62716	0.941727	0.623018	0.527462	0.941727	1.62716	0.623018	0.527462	6	17	5	4	0.851509	2.10393	0.529204	0.484347
724033	NR_030386	MIR663A	microRNA 663a	-1.68048	3.12859	-1.2382	3.3677	-2.02596	2.97273	-1.20559	2.63816	-1.63621	2.8398	2.77648	3.52535	3.2171	2.50674	3.52535	2.77648	3.2171	2.50674	64	43	66	31	10.2591	5.8401	8.38406	4.88214
728658	NR_026712	RPL13AP5	ribosomal protein L13a pseudogene 5	-2.68093	8.28079	-3.79048	8.00396	-2.39532	8.36886	1.11924	7.68075	1.58245	7.42398	7.59992	9.02266	7.10028	7.76244	9.02266	7.59992	7.10028	7.76244	22760	10003	7389	9363	523.082	195.48	134.12	214.014
728661	NM_001110781,NM_001290264	SLC35E2B	solute carrier family 35 member E2B	-1.66397	0.971653	-1.57821	1.0254	3.11811	2.06978	5.18845	1.43029	4.92104	1.50941	0.671449	1.40608	0.747788	3.04675	1.40608	0.671449	0.747788	3.04675	654	301	358	2995	1.53775	0.602057	0.665984	7.49744
728689	NM_001099661,NM_001099661_dup1,NM_001317856,NM_001317856_dup1,NM_001317857,NM_001317857_dup1	EIF3CL	eukaryotic translation initiation factor 3 subunit C like	-3.34125	5.87323	-3.11045	5.93277	-1.07228	6.75701	3.11602	5.82963	2.90077	5.88874	5.06715	6.80754	5.17042	6.70685	6.80754	5.06715	5.17042	6.70685	23115	7865	9086	20994	112.967	32.5035	34.9586	102.068
729533	NM_001123168,NM_001317901,NR_134239	FAM72A	family with sequence similarity 72 member A	-1.74243	2.61053	-1.11255	2.9637	-2.47002	2.29861	-1.41757	1.97282	-2.22015	2.23972	2.24053	3.04163	2.88776	1.73711	3.04163	2.24053	2.88776	1.73711	1079	615	1193	382	6.93199	3.71701	6.46965	2.47289
100033416	NR_003319	SNORD116-4	small nucleolar RNA, C/D box 116-4	1.20982	1.90948	-3.17971	0.438342	1.39114	2.00103	1.14987	2.15019	4.42341	0.493599	2.05182	1.77702	0.108127	2.25329	1.77702	2.05182	0.108127	2.25329	15	25	1	26	2.27458	3.15759	0.073518	3.93411
100033432	NR_003335	SNORD116-21	small nucleolar RNA, C/D box 116-21	1.03866	1.43404	1.2579	1.56371	-1.86928	0.842458	-1.94154	0.858686	-2.35137	0.936333	1.46166	1.40694	1.73796	0.504455	1.40694	1.46166	1.73796	0.504455	10	13	19	3	1.54033	1.77159	2.33132	0.462584
100033820	NR_003361	SNORD116-28	small nucleolar RNA, C/D box 116-28	2.28098	0.228808	1.97972	0.208974	1.70095	0.185383	-1.341	0.998299	-1.16389	0.911762	1.23215	0.0424896	1.02779	0.808834	0.0424896	1.23215	1.02779	0.808834	1	10	8	6	0.02576	1.3594	1.01479	0.81022
100113378	NR_003684	SNORD119	small nucleolar RNA, C/D box 119	-1.51536	1.3896	-1.4026	1.45706	-2.08293	1.06815	-1.37454	0.86226	-1.48505	0.904121	1.12175	1.72141	1.23331	0.662798	1.72141	1.12175	1.23331	0.662798	14	9	11	5	2.15708	1.18961	1.33664	0.639089
100113380	NR_003686	SNORD125	small nucleolar RNA, C/D box 125	-1.3731	1.57892	-2.26689	1.08335	-1.12866	1.73462	1.21657	1.50145	2.00847	1.0302	1.36669	1.82412	0.643408	1.6495	1.82412	1.36669	0.643408	1.6495	16	12	5	15	2.38939	1.58407	0.549944	2.27296
100130771	NR_027068	EFCAB10	EF-hand calcium binding domain 10	1.97523	1.97815	1.08074	1.6022	2.1686	2.03016	1.0979	2.59569	2.00659	2.10237	2.52919	1.54717	1.65919	2.66393	1.54717	2.52919	1.65919	2.66393	92	281	138	281	1.80502	4.71827	2.1468	5.52794
100133991	NR_024434,NR_024435,NR_110324,NR_110325,NR_110326	MAP3K14-AS1	MAP3K14 antisense RNA 1	1.24048	2.26491	1.31923	2.30599	2.01684	2.57152	1.62586	2.75406	1.5288	2.80402	2.42568	2.11479	2.51449	3.12689	2.11479	2.42568	2.51449	3.12689	214	351	408	534	3.1358	4.36332	4.77928	7.96787
100137049	NM_001114633	PLA2G4B	phospholipase A2 group IVB	-1.59	0.157328	-1.59817	0.139802	2.53849	1.20094	4.03619	0.268316	4.05693	0.238426	0.0351506	0.704175	0.0277553	2.04814	0.704175	0.0351506	0.0277553	2.04814	105	6	5	600	0.577017	0.025141	0.018621	3.29609
100287082	NR_120598	GACAT2	gastric cancer associated transcript 2 (non-protein coding)	1.8617	3.43377	1.18671	3.13566	2.2921	3.56305	1.23118	4.05848	1.93147	3.70613	3.91122	3.0146	3.26157	4.21127	3.0146	3.91122	3.26157	4.21127	369	892	597	956	6.80422	14.0173	8.70777	17.5733
100294145	NR_037177,NR_037178	LOC100294145	uncharacterized LOC100294145	1.32885	2.97277	-1.12254	2.69007	1.8065	3.17279	1.35945	3.39922	2.02788	3.07597	3.18492	2.77474	2.60797	3.62794	2.77474	3.18492	2.60797	3.62794	1342	2282	1580	2797	5.58342	8.10463	5.19241	11.5552
100302138	NR_031699	MIR1292	microRNA 1292	-1.6863	1.35858	-1.5248	1.45096	-2.11334	1.12421	-1.25324	0.854769	-1.38598	0.912887	1.03297	1.78683	1.17822	0.707309	1.78683	1.03297	1.17822	0.707309	11	6	7	4	2.30005	1.04921	1.234	0.696227
100422832	NR_036159	MIR3191	microRNA 3191	1.41393	1.41199	1.05853	1.22442	2.40343	1.70294	1.69982	2.03073	2.27053	1.76096	1.68378	1.18407	1.26614	2.44917	1.18407	1.68378	1.26614	2.44917	6	14	9	24	1.17619	2.22133	1.38805	4.65356
100422943	NR_036156	MIR3189	microRNA 3189	3.65741	1.75586	1.64155	1.36557	5.09209	1.89375	1.39227	3.15459	3.10201	2.45339	2.92489	1.05407	1.76912	3.40233	1.05407	2.92489	1.76912	3.40233	5	38	15	48	0.9989	6.57857	2.39931	9.77325
100423037	NR_036137	MIR3176	microRNA 3176	-1.67983	2.3781	-1.56911	2.43495	-3.59151	1.61433	-2.13802	1.3802	-2.28889	1.41319	2.0332	2.78151	2.13157	0.936923	2.78151	2.0332	2.13157	0.936923	34	22	26	6	5.61496	3.10509	3.42967	0.989451
100499177	NR_034075,NR_034076,NR_034077	THAP9-AS1	THAP9 antisense RNA 1	-1.20373	3.09344	-2.11931	2.63313	-1.11782	3.14871	1.07685	3.01551	1.89592	2.56679	2.96258	3.23009	2.14649	3.06939	3.23009	2.96258	2.14649	3.06939	1220	1197	665	1155	8.09368	6.78353	3.49623	7.6241
100506076	NR_103732,NR_103732_dup1,NR_103733,NR_103733_dup1	LOC100506076	uncharacterized LOC100506076	-2.52314	0.978302	-2.50885	0.986025	-1.30615	1.64811	1.93173	0.870601	1.92079	0.877474	0.516779	1.852	0.524971	1.46667	1.852	0.516779	0.524971	1.46667	127	24	24	94	2.45123	0.435007	0.429396	1.87946
100506084	NM_001039083,NM_001103154,NM_001330240,NM_001330240_dup1,NM_001330240_dup2	ARL17B	ADP ribosylation factor like GTPase 17B	-1.01713	0.728791	2.49034	1.23487	1.50071	0.991641	1.52642	0.975106	-1.65945	1.65223	0.716639	0.74115	2.05749	1.32679	0.74115	0.716639	2.05749	1.32679	24	32	304	118	0.618516	0.65441	3.19314	1.63168
100507475	NR_046452	IDH1-AS1	IDH1 antisense RNA 1	1.02789	1.35654	-1.68786	0.881803	1.2283	1.47775	1.19498	1.49952	2.0732	0.974747	1.37653	1.33685	0.58165	1.63351	1.33685	1.37653	0.58165	1.63351	46	62	21	74	1.41224	1.60428	0.486546	2.24266
100526693	NM_001198793	ARPC4-TTLL3	ARPC4-TTLL3 readthrough	1.34399	0.790808	1.07038	0.653021	-1.4933	0.128584	-2.00698	0.167853	-1.59841	0.138607	1.03232	0.605797	0.703926	0.0272926	0.605797	1.03232	0.703926	0.0272926	127	326	205	6	0.478483	1.04842	0.611552	0.021854
100526760	NM_001316331	ABHD14A-ACY1	ABHD14A-ACY1 readthrough	-1.98172	0.8457	-2.15445	0.733263	-2.16846	0.723815	-1.09423	0.415716	-1.0065	0.360446	0.485719	1.47247	0.365151	0.355802	1.47247	0.485719	0.365151	0.355802	207	60	45	39	1.662	0.40388	0.283507	0.307847
100526783	NM_001199058	C15orf38-AP3S2	C15orf38-AP3S2 readthrough	-3.06835	1.63645	-3.00912	1.65892	-2.85134	1.71951	1.07611	1.06825	1.05533	1.08292	1.01665	2.63411	1.04477	1.12247	2.63411	1.01665	1.04477	1.12247	2054	500	547	531	4.96293	1.02601	1.04269	1.27597
100526832	NM_001199290,NR_144936	PHOSPHO2-KLHL23	PHOSPHO2-KLHL23 readthrough	2.77296	0.933498	2.25448	0.858011	2.82252	0.939677	1.01787	1.93702	1.25196	1.78038	1.92428	0.452854	1.62565	1.94984	0.452854	1.92428	1.62565	1.94984	93	800	682	854	0.336918	2.79547	2.06494	3.03451
100533179	NR_037904	UBE2F-SCLY	UBE2F-SCLY readthrough (NMD candidate)	1.00711	0.0311148	2.29901	0.180075	-1.01085	0.0169273	-1.01804	0.0199362	-2.32396	0.11538	0.0366457	0.0264187	1.22743	0.0108458	0.0264187	0.0366457	1.22743	0.0108458	4	7	329	2	0.016349	0.026422	1.32145	0.00845
100533496	NM_001204478,NR_037924	TVP23C-CDRT4	TVP23C-CDRT4 readthrough	-1.00824	0.0933864	-1.03574	0.069707	6.86523	0.535191	6.92182	0.502327	7.11058	0.374956	0.0876519	0.099496	0.0488369	2.8788	0.099496	0.0876519	0.0488369	2.8788	12	14	8	1239	0.065012	0.064211	0.032807	6.56516
100534595	NR_037946	HNRNPUL2-BSCL2	HNRNPUL2-BSCL2 readthrough (NMD candidate)	-1.10613	1.38902	-1.1023	1.39165	1.89035	1.86735	2.09098	1.77209	2.08373	1.77545	1.31816	1.46368	1.32317	2.38234	1.46368	1.31816	1.32317	2.38234	437	470	500	1175	1.64596	1.50312	1.48609	4.40117
100616487	NR_039742	MIR4517	microRNA 4517	-1.13258	2.45511	-1.07772	2.49199	-2.14557	1.91841	-1.8944	1.84952	-1.99084	1.8773	2.36695	2.54656	2.43858	1.44521	2.54656	2.36695	2.43858	1.44521	25	26	30	10	4.61896	4.13857	4.47609	1.84163
100874392	NR_046228	ANKRD20A12P	ankyrin repeat domain 20 family member A12, pseudogene	1.96435	1.99214	1.12563	1.64694	2.11212	2.03279	1.07523	2.58962	1.87639	2.14089	2.53783	1.56378	1.73451	2.64248	1.56378	2.53783	1.73451	2.64248	213	645	339	631	1.8404	4.75061	2.32054	5.43486
100996928	NM_001244584	C7orf55-LUC7L2	C7orf55-LUC7L2 readthrough	-2.57157	1.09813	-1.35415	1.74127	-1.77335	1.50469	1.45012	0.837205	-1.30956	1.32753	0.610994	1.97364	1.53625	1.14717	1.97364	0.610994	1.53625	1.14717	501	114	435	243	2.75693	0.531214	1.88988	1.32592
101060321	NM_001291462,NM_001291462_dup1,NM_001291462_dup2,NM_001291462_dup3	TBC1D3G	TBC1 domain family member 3G	-1.00385	0.0126591	-1.00609	0.0104658	2.6706	0.15013	2.68088	0.120823	2.68688	0.0998898	0.010188	0.0157297	0.0069635	1.43289	0.0157297	0.010188	0.0069635	1.43289	2	2	1	250	0.009696	0.007248	0.004305	1.81364
102465252	NR_106761	MIR6506	microRNA 6506	3.95506	0.547986	-1.01503	0.130107	-1.01248	0.132061	-4.00442	0.512112	1.00252	0.121589	2.12501	0.141312	0.11979	0.123415	0.141312	2.12501	0.11979	0.123415	1	18	1	1	0.094199	3.36129	0.081501	0.100436
102465464	NR_106833	MIR6775	microRNA 6775	-1.40002	2.47992	-1.38444	2.48881	-2.4023	2.00497	-1.7159	1.81831	-1.73522	1.82483	2.24904	2.7345	2.26519	1.47008	2.7345	2.24904	2.26519	1.47008	25	21	23	9	5.40122	3.74751	3.88559	1.88624
102465491	NR_106877	MIR6819	microRNA 6819	-1.68696	1.13754	-1.27442	1.38978	-2.32551	0.751189	-1.37852	0.542315	-1.82475	0.662568	0.82124	1.57567	1.22582	0.358124	1.57567	0.82124	1.22582	0.358124	8	4	7	2	1.86061	0.776418	1.31836	0.310034
102465502	NR_106893	MIR6835	microRNA 6835	-1.53517	1.30433	1.00956	1.65653	-2.18516	0.927924	-1.42339	0.733671	-2.20605	0.931778	1.03128	1.64968	1.66341	0.521945	1.64968	1.03128	1.66341	0.521945	9	6	12	3	2.00501	1.04638	2.15833	0.479317
102465523	NR_106927	MIR6867	microRNA 6867	1.09165	0.258084	-1.02352	0.184938	2.06925	0.503395	1.89553	0.641668	2.11793	0.459808	0.328975	0.202469	0.168926	1.25158	0.202469	0.328975	0.168926	1.25158	1	2	1	7	0.134089	0.260332	0.12003	1.50248
102465976	NR_106865	MIR6807	microRNA 6807	-1.4874	2.1711	-1.15477	2.37023	-2.0179	1.90366	-1.35667	1.66904	-1.74745	1.82212	1.90351	2.4763	2.2687	1.46344	2.4763	1.90351	2.2687	1.46344	27	20	30	12	4.33247	2.73729	3.89373	1.87761
102466759	NR_106954	MIR6894	microRNA 6894	-1.46483	1.49724	-1.41234	1.52852	-2.20899	1.08458	-1.50802	0.903294	-1.56406	0.922165	1.24698	1.79772	1.29963	0.654331	1.79772	1.24698	1.29963	0.654331	9	7	7	3	2.32742	1.38484	1.44615	0.632231
102724428	NM_001320643	LOC102724428	serine/threonine-protein kinase SIK1	-1.00192	0.00154326	10.2133	0.107784	-1.00138	0.00225645	1.00054	0.0010059	-10.2274	0.0702538	0.00068797	0.00346187	3.35584	0.00147075	0.00346187	0.00068797	3.35584	0.00147075	1	1	3768	1	0.002421	0.000386	9.36569	0.001216
102724571	NR_132738	LINC01759	long intergenic non-protein coding RNA 1759	1.59618	1.16697	1.02268	0.89346	2.28574	1.34772	1.43201	1.79245	2.23505	1.37235	1.55205	0.877428	0.909783	2.07009	0.877428	1.55205	0.909783	2.07009	51	149	72	219	0.773236	1.94205	0.868478	3.35322
102800317	NM_001289912	LOC400927-CSNK1E	LOC400927-CSNK1E readthrough	3.58655	0.957585	3.81539	0.976388	-1.13174	0.30547	-4.05905	0.717788	-4.31803	0.731883	2.25012	0.40752	2.33935	0.228975	0.40752	2.25012	2.33935	0.228975	60	874	1039	38	0.298036	3.74928	4.13826	0.189906
105371267	NR_136518,NR_147075	LOC105371267	p53-regulated lncRNA 1	1.85169	1.31193	1.01556	0.951814	2.04829	1.36313	1.10618	1.90098	2.01692	1.37917	1.82958	0.940743	0.963016	1.97517	0.940743	1.82958	0.963016	1.97517	143	477	213	465	0.849081	2.56575	0.931833	3.09829
106614088	NR_132742	MIR34AHG	MIR34A host gene	1.55159	2.174	-3.64213	0.1697	1.71863	2.23688	1.10766	2.58655	6.2595	0.201903	2.51385	1.8801	0.0153173	2.66136	1.8801	2.51385	0.0153173	2.66136	693	1510	4	1525	2.51931	4.66887	0.010073	5.51711
109623451	NR_145781	SNORD157	small nucleolar RNA, C/D box 157	-2.35893	1.3234	-1.09978	2.01033	-3.16846	0.930593	-1.34318	0.592062	-2.88099	0.899376	0.841976	2.08011	1.94289	0.416326	2.08011	0.841976	1.94289	0.416326	14	5	17	2	3.03869	0.799469	2.85052	0.372285
109623460	NR_145802	SNORD138	small nucleolar RNA, C/D box 138	-1.51479	1.08437	-2.32208	0.54581	-1.42613	1.14009	1.06217	0.867842	1.62824	0.436824	0.825422	1.42454	0.209126	0.912442	1.42454	0.825422	0.209126	0.912442	7	4	1	4	1.571	0.782083	0.155809	0.95494
109623464	NR_145807	SNORA119	small nucleolar RNA, H/ACA box 119	-1.01384	0.549347	1.41271	0.769212	-1.42136	0.170678	-1.40196	0.167626	-2.00796	0.234715	0.539522	0.55935	1.05781	0.0520802	0.55935	0.539522	1.05781	0.0520802	5	6	13	1	0.430481	0.459752	1.06274	0.042399

## Sheet: gomap_stat
Namespace	GOID	Term	count	Genes	Sig.NotIn.GO	Genome.In.GO	Genome.NotIn.GO	PValue	Bonferroni	FDR
cellular_component	GO:0044464	cell part	347	PLA2G4B, ARL17B, ARPC4-TTLL3, ABHD14A-ACY1, C15orf38-AP3S2, UBE2F-SCLY, PTPRU, ARPC5, C7orf55-LUC7L2, TBC1D3G, KIF20A, TOB1, CDKN1A, LOC102724428, CDKN2C, CDKN3, NDC80, TACC3, CEBPB, DPYSL4, CENPA, MXD4, ST6GALNAC2, TRIM3, SPAG5, TGOLN2, CENPE, CENPF, CFL2, DBF4, PNRC1, KIF2C, UBE2C, PRSS23, ATE1, ADAMTS7, CYGB, OSBPL8, LYPD1, MRPL10, PLK3, RNF19B, KLF6, SPATA18, CMBL, COX15, CRIP2, MIB2, HNRNPA1…	109	15687	37306	6.77884e-92	3.68498e-88	3.68498e-88
cellular_component	GO:0005623	cell	347	PLA2G4B, ARL17B, ARPC4-TTLL3, ABHD14A-ACY1, C15orf38-AP3S2, UBE2F-SCLY, PTPRU, ARPC5, C7orf55-LUC7L2, TBC1D3G, KIF20A, TOB1, CDKN1A, LOC102724428, CDKN2C, CDKN3, NDC80, TACC3, CEBPB, DPYSL4, CENPA, MXD4, ST6GALNAC2, TRIM3, SPAG5, TGOLN2, CENPE, CENPF, CFL2, DBF4, PNRC1, KIF2C, UBE2C, PRSS23, ATE1, ADAMTS7, CYGB, OSBPL8, LYPD1, MRPL10, PLK3, RNF19B, KLF6, SPATA18, CMBL, COX15, CRIP2, MIB2, HNRNPA1…	109	15727	37266	1.44275e-91	7.8428e-88	3.9214e-88
cellular_component	GO:0005622	intracellular	325	PLA2G4B, ARL17B, ARPC4-TTLL3, ABHD14A-ACY1, C15orf38-AP3S2, UBE2F-SCLY, ARPC5, C7orf55-LUC7L2, KIF20A, TOB1, CDKN1A, LOC102724428, CDKN2C, CDKN3, NDC80, TACC3, CEBPB, DPYSL4, CENPA, MXD4, ST6GALNAC2, TRIM3, SPAG5, TGOLN2, CENPE, CENPF, CFL2, DBF4, PNRC1, KIF2C, UBE2C, PRSS23, ATE1, ADAMTS7, CYGB, OSBPL8, MRPL10, PLK3, RNF19B, KLF6, SPATA18, CMBL, COX15, CRIP2, MIB2, HNRNPA1L2, ZFP90, KIF18B, MANE…	131	13637	39356	1.9232e-90	1.04545e-86	3.48484e-87
cellular_component	GO:0044424	intracellular part	318	PLA2G4B, ARPC4-TTLL3, ABHD14A-ACY1, C15orf38-AP3S2, UBE2F-SCLY, ARPC5, C7orf55-LUC7L2, KIF20A, TOB1, CDKN1A, CDKN2C, CDKN3, NDC80, TACC3, CEBPB, DPYSL4, CENPA, MXD4, ST6GALNAC2, TRIM3, SPAG5, TGOLN2, CENPE, CENPF, CFL2, DBF4, PNRC1, KIF2C, UBE2C, PRSS23, ATE1, ADAMTS7, CYGB, OSBPL8, MRPL10, PLK3, RNF19B, KLF6, SPATA18, CMBL, COX15, CRIP2, MIB2, HNRNPA1L2, ZFP90, KIF18B, MANEAL, CKAP2L, SGOL2, CDC…	138	13299	39694	1.50886e-87	8.20215e-84	2.05054e-84
biological_process	GO:0009987	cellular process	333	PLA2G4B, ARL17B, ARPC4-TTLL3, ABHD14A-ACY1, UBE2F-SCLY, PTPRU, ARPC5, C7orf55-LUC7L2, KIF20A, TOB1, CDKN1A, LOC102724428, CDKN2C, CDKN3, NDC80, TACC3, CEBPB, DPYSL4, CENPA, MXD4, ST6GALNAC2, TRIM3, SPAG5, CENPE, CENPF, CFL2, DBF4, PNRC1, KIF2C, UBE2C, ATE1, ADAMTS7, CYGB, OSBPL8, MRPL10, PLK3, RNF19B, KLF6, SPATA18, COX15, CRIP2, MIB2, HNRNPA1L2, ZFP90, RTN4RL1, KIF18B, SGOL2, CDCA2, DGKA, DDB2, …	123	14825	38168	4.53267e-87	2.46396e-83	4.92792e-84
molecular_function	GO:0005488	binding	321	EFCAB10, ARL17B, UBE2F-SCLY, PTPRU, TSSC4, ARPC5, C7orf55-LUC7L2, KIF20A, TOB1, CDKN1A, LOC102724428, CDKN2C, CDKN3, NDC80, TACC3, CEBPB, DPYSL4, CENPA, MXD4, TRIM3, SPAG5, TGOLN2, CENPE, CENPF, CFL2, DBF4, PNRC1, KIF2C, UBE2C, ATE1, ADAMTS7, CYGB, OSBPL8, MRPL10, PLK3, RNF19B, KLF6, SPATA18, CRIP2, MIB2, HNRNPA1L2, ZFP90, RTN4RL1, KIF18B, KLHL23, SGOL2, FAM84B, DGKA, DDB2, GADD45A, DDIT3, DPYSL2…	135	13906	39087	8.12569e-85	4.41712e-81	7.36187e-82
molecular_function	GO:0005515	protein binding	281	UBE2F-SCLY, PTPRU, TSSC4, ARPC5, KIF20A, TOB1, CDKN1A, CDKN2C, CDKN3, NDC80, TACC3, CEBPB, DPYSL4, CENPA, MXD4, TRIM3, SPAG5, TGOLN2, CENPE, CENPF, CFL2, PNRC1, KIF2C, UBE2C, ATE1, ADAMTS7, CYGB, MRPL10, PLK3, RNF19B, KLF6, SPATA18, MIB2, RTN4RL1, KIF18B, KLHL23, SGOL2, FAM84B, DDB2, GADD45A, DDIT3, DPYSL2, E2F1, E2F2, ECT2, DCP1B, ELF2, HACD2, STOM, FDXR, TPX2, MRPS27, ARL6IP1, ICOSLG, NCAPH, IS…	175	10429	42564	8.30743e-84	4.51592e-80	6.45131e-81
biological_process	GO:0044699	single-organism process	313	PLA2G4B, ARL17B, ARPC4-TTLL3, ABHD14A-ACY1, PTPRU, ARPC5, KIF20A, TOB1, CDKN1A, LOC102724428, CDKN2C, CDKN3, NDC80, TACC3, CEBPB, DPYSL4, CENPA, MXD4, ST6GALNAC2, TRIM3, SPAG5, TGOLN2, CENPE, CENPF, CFL2, DBF4, KIF2C, UBE2C, ADAMTS7, CYGB, OSBPL8, MRPL10, PLK3, RNF19B, SPATA18, COX15, CRIP2, MIB2, RTN4RL1, KIF18B, SGOL2, CDCA2, DGKA, DDB2, GADD45A, DDIT3, DPYSL2, E2F1, E2F2, ECT2, ELF2, HACD2, AK…	143	13334	39659	3.6066e-83	1.96055e-79	2.45068e-80
cellular_component	GO:0043226	organelle	298	PLA2G4B, ARPC4-TTLL3, ARPC5, C7orf55-LUC7L2, KIF20A, TOB1, CDKN1A, CDKN2C, CDKN3, NDC80, TACC3, CEBPB, CENPA, MXD4, ST6GALNAC2, TRIM3, SPAG5, TGOLN2, CENPE, CENPF, CFL2, DBF4, PNRC1, KIF2C, UBE2C, PRSS23, ATE1, ADAMTS7, OSBPL8, MRPL10, PLK3, RNF19B, KLF6, SPATA18, CMBL, COX15, MIB2, HNRNPA1L2, ZFP90, RTN4RL1, KIF18B, MANEAL, CKAP2L, SGOL2, CDCA2, DDB2, GADD45A, DDIT3, DPYSL2, E2F1, E2F2, ECT2, DC…	158	12531	40462	3.75657e-78	2.04207e-74	2.26897e-75
biological_process	GO:0044763	single-organism cellular process	289	PLA2G4B, ARL17B, ARPC4-TTLL3, ABHD14A-ACY1, PTPRU, ARPC5, KIF20A, TOB1, CDKN1A, LOC102724428, CDKN2C, CDKN3, NDC80, TACC3, CEBPB, DPYSL4, CENPA, ST6GALNAC2, SPAG5, CENPE, CENPF, CFL2, DBF4, KIF2C, UBE2C, ADAMTS7, CYGB, OSBPL8, MRPL10, PLK3, RNF19B, SPATA18, COX15, MIB2, RTN4RL1, KIF18B, SGOL2, CDCA2, DGKA, DDB2, GADD45A, DDIT3, DPYSL2, E2F1, E2F2, ECT2, ELF2, HACD2, AK1, STOM, ALDH3A1, ACSL4, VWC…	167	12097	40896	6.19595e-75	3.36812e-71	3.36812e-72
cellular_component	GO:0005737	cytoplasm	266	PLA2G4B, ABHD14A-ACY1, C15orf38-AP3S2, UBE2F-SCLY, ARPC5, KIF20A, TOB1, CDKN1A, CDKN2C, CDKN3, NDC80, TACC3, CEBPB, DPYSL4, CENPA, ST6GALNAC2, TRIM3, SPAG5, TGOLN2, CENPE, CENPF, CFL2, KIF2C, UBE2C, ATE1, ADAMTS7, CYGB, OSBPL8, MRPL10, PLK3, RNF19B, SPATA18, CMBL, COX15, CRIP2, MIB2, HNRNPA1L2, KIF18B, MANEAL, CKAP2L, SGOL2, CDCA2, FAM84B, DGKA, GADD45A, DDIT3, DPYSL2, E2F1, ECT2, DCP1B, ELF2, HA…	190	10368	42625	1.02317e-72	5.56196e-69	5.05633e-70
cellular_component	GO:0043229	intracellular organelle	277	PLA2G4B, ARPC4-TTLL3, ARPC5, C7orf55-LUC7L2, KIF20A, TOB1, CDKN1A, CDKN2C, CDKN3, NDC80, TACC3, CEBPB, CENPA, MXD4, ST6GALNAC2, TRIM3, SPAG5, TGOLN2, CENPE, CENPF, CFL2, DBF4, PNRC1, KIF2C, UBE2C, PRSS23, ATE1, ADAMTS7, OSBPL8, MRPL10, PLK3, RNF19B, KLF6, SPATA18, COX15, MIB2, HNRNPA1L2, ZFP90, KIF18B, MANEAL, CKAP2L, SGOL2, CDCA2, DDB2, GADD45A, DDIT3, DPYSL2, E2F1, E2F2, ECT2, DCP1B, ELF2, HACD…	179	11497	41496	4.89801e-71	2.66256e-67	2.2188e-68
cellular_component	GO:0043227	membrane-bounded organelle	277	PLA2G4B, ARPC5, C7orf55-LUC7L2, KIF20A, TOB1, CDKN1A, CDKN2C, CDKN3, NDC80, CEBPB, CENPA, MXD4, ST6GALNAC2, TRIM3, SPAG5, TGOLN2, CENPE, CENPF, CFL2, DBF4, PNRC1, KIF2C, UBE2C, PRSS23, ATE1, ADAMTS7, OSBPL8, MRPL10, PLK3, RNF19B, KLF6, SPATA18, CMBL, COX15, MIB2, HNRNPA1L2, ZFP90, RTN4RL1, KIF18B, MANEAL, SGOL2, CDCA2, DDB2, GADD45A, DDIT3, DPYSL2, E2F1, E2F2, ECT2, DCP1B, ELF2, HACD2, AK1, STOM,…	179	11629	41364	6.2588e-70	3.40228e-66	2.61714e-67
biological_process	GO:0065007	biological regulation	268	PLA2G4B, ARL17B, ARPC4-TTLL3, PTPRU, ARPC5, TBC1D3G, TOB1, CDKN1A, LOC102724428, CDKN2C, CDKN3, NDC80, TACC3, CEBPB, CENPA, MXD4, SPAG5, CENPE, CENPF, CFL2, DBF4, PNRC1, KIF2C, UBE2C, ADAMTS7, CYGB, OSBPL8, PLK3, RNF19B, KLF6, CRIP2, MIB2, ZFP90, KIF18B, SGOL2, CDCA2, DGKA, GADD45A, DDIT3, DPYSL2, E2F1, E2F2, ECT2, DCP1B, ELF2, AK1, STOM, ALDH3A1, ACSL4, VWCE, FDXR, TPX2, ASTN2, ICOSLG, ISCU, COR…	188	11109	41884	9.73139e-68	5.28998e-64	3.77856e-65
biological_process	GO:0008152	metabolic process	272	PLA2G4B, ARPC4-TTLL3, ABHD14A-ACY1, UBE2F-SCLY, PTPRU, C7orf55-LUC7L2, TBC1D3G, KIF20A, TOB1, CDKN1A, LOC102724428, CDKN2C, CDKN3, CEBPB, DPYSL4, MXD4, ST6GALNAC2, TRIM3, CENPE, CENPF, DBF4, PNRC1, KIF2C, UBE2C, PRSS23, ATE1, ADAMTS7, CYGB, OSBPL8, MRPL10, PLK3, RNF19B, KLF6, SPATA18, CMBL, COX15, MIB2, HNRNPA1L2, ZFP90, KIF18B, MANEAL, CDCA2, DGKA, DDB2, GADD45A, DDIT3, DPYSL2, E2F1, E2F2, ECT2,…	184	11637	41356	2.94089e-66	1.59867e-62	1.06578e-63
biological_process	GO:0007049	cell cycle	112	KIF20A, CDKN1A, CDKN2C, CDKN3, NDC80, TACC3, CENPA, SPAG5, CENPE, CENPF, DBF4, KIF2C, UBE2C, PLK3, KIF18B, SGOL2, CDCA2, GADD45A, DDIT3, E2F1, E2F2, ECT2, AK1, TPX2, NCAPH, KIF4A, ASPM, FBXO5, NUPR1, SESN1, UBE2S, GAS2L3, RACGAP1, UHRF1, GPSM2, SERTAD1, H2AFX, BIRC5, INCENP, KIF11, KIFC1, KIF22, MAD2L1, MCM6, MDM2, MKI67, NEK2, CUZD1, PCNA, NUSAP1, TRIAP1, PLK1, SEPT5, ANLN, FAM64A, ERCC6L, SPDL1…	344	1661	51332	1.0731e-62	5.83338e-59	3.64586e-60
cellular_component	GO:0043231	intracellular membrane-bounded organelle	252	PLA2G4B, C7orf55-LUC7L2, KIF20A, TOB1, CDKN1A, CDKN2C, CDKN3, NDC80, CEBPB, CENPA, MXD4, ST6GALNAC2, TRIM3, SPAG5, TGOLN2, CENPE, CENPF, CFL2, DBF4, PNRC1, KIF2C, UBE2C, PRSS23, ATE1, ADAMTS7, OSBPL8, MRPL10, PLK3, RNF19B, KLF6, SPATA18, COX15, MIB2, HNRNPA1L2, ZFP90, KIF18B, MANEAL, SGOL2, CDCA2, DDB2, GADD45A, DDIT3, DPYSL2, E2F1, E2F2, ECT2, DCP1B, ELF2, HACD2, STOM, ALDH3A1, ACSL4, FDXR, HSPA…	204	10470	42523	9.48949e-62	5.15849e-58	3.0344e-59
biological_process	GO:0022402	cell cycle process	100	KIF20A, CDKN1A, CDKN2C, CDKN3, NDC80, TACC3, CENPA, SPAG5, CENPE, CENPF, DBF4, KIF2C, UBE2C, PLK3, KIF18B, CDCA2, GADD45A, DDIT3, E2F1, ECT2, AK1, TPX2, NCAPH, KIF4A, ASPM, FBXO5, SESN1, UBE2S, GAS2L3, RACGAP1, GPSM2, H2AFX, BIRC5, INCENP, KIF11, KIFC1, KIF22, MAD2L1, MCM6, MDM2, MKI67, NEK2, PCNA, NUSAP1, TRIAP1, PLK1, SEPT5, ANLN, FAM64A, ERCC6L, SPDL1, CDCA8, CEP55, MIS18BP1, MCM10, PRKAB1, CY…	356	1264	51729	1.55513e-61	8.45368e-58	4.69649e-59
biological_process	GO:1903047	mitotic cell cycle process	85	KIF20A, CDKN1A, CDKN2C, CDKN3, NDC80, CENPA, SPAG5, CENPE, CENPF, DBF4, KIF2C, UBE2C, PLK3, KIF18B, CDCA2, GADD45A, E2F1, TPX2, NCAPH, KIF4A, ASPM, FBXO5, UBE2S, RACGAP1, GPSM2, BIRC5, INCENP, KIF11, KIFC1, KIF22, MAD2L1, MCM6, MDM2, NEK2, PCNA, NUSAP1, TRIAP1, PLK1, ANLN, FAM64A, ERCC6L, SPDL1, CDCA8, CEP55, MIS18BP1, MCM10, KIF15, SPC25, BCAT1, NCAPG, STIL, AURKA, BUB1, BUB1B, TOP2A, TTK, TUBA4…	371	833	52160	5.07887e-60	2.76087e-56	1.45309e-57
biological_process	GO:0000278	mitotic cell cycle	90	KIF20A, CDKN1A, CDKN2C, CDKN3, NDC80, CENPA, SPAG5, CENPE, CENPF, DBF4, KIF2C, UBE2C, PLK3, KIF18B, SGOL2, CDCA2, GADD45A, E2F1, E2F2, TPX2, NCAPH, KIF4A, ASPM, FBXO5, UBE2S, RACGAP1, GPSM2, BIRC5, INCENP, KIF11, KIFC1, KIF22, MAD2L1, MCM6, MDM2, NEK2, PCNA, NUSAP1, TRIAP1, PLK1, ANLN, FAM64A, ERCC6L, SPDL1, CDCA8, CEP55, MIS18BP1, MCM10, KIF15, SPC25, POLD4, BCAT1, RANGAP1, NCAPG, STIL, AURKA, B…	366	991	52002	9.64514e-60	5.2431e-56	2.62155e-57
biological_process	GO:0050789	regulation of biological process	250	PLA2G4B, ARL17B, ARPC4-TTLL3, PTPRU, ARPC5, TBC1D3G, TOB1, CDKN1A, LOC102724428, CDKN2C, CDKN3, NDC80, TACC3, CEBPB, CENPA, MXD4, SPAG5, CENPE, CENPF, CFL2, DBF4, PNRC1, KIF2C, UBE2C, ADAMTS7, CYGB, OSBPL8, PLK3, RNF19B, KLF6, CRIP2, MIB2, ZFP90, KIF18B, SGOL2, CDCA2, DGKA, GADD45A, DDIT3, DPYSL2, E2F1, E2F2, ECT2, DCP1B, ELF2, AK1, STOM, ALDH3A1, ACSL4, VWCE, TPX2, ASTN2, ICOSLG, CORO1C, PHLDA3,…	206	10575	42418	1.5826e-59	8.603e-56	4.09667e-57
biological_process	GO:0050794	regulation of cellular process	241	PLA2G4B, ARL17B, ARPC4-TTLL3, PTPRU, ARPC5, TOB1, CDKN1A, LOC102724428, CDKN2C, CDKN3, NDC80, TACC3, CEBPB, CENPA, MXD4, SPAG5, CENPE, CENPF, CFL2, PNRC1, KIF2C, UBE2C, ADAMTS7, CYGB, OSBPL8, PLK3, RNF19B, KLF6, CRIP2, MIB2, ZFP90, KIF18B, SGOL2, CDCA2, DGKA, GADD45A, DDIT3, DPYSL2, E2F1, E2F2, ECT2, ELF2, AK1, STOM, ALDH3A1, ACSL4, VWCE, TPX2, ASTN2, ICOSLG, CORO1C, PHLDA3, PLXNB2, FLRT2, FYB, R…	215	10049	42944	1.08585e-57	5.90266e-54	2.68303e-55
biological_process	GO:0051301	cell division	72	KIF20A, CDKN1A, NDC80, SPAG5, CENPE, CENPF, KIF2C, UBE2C, PLK3, KIF18B, SGOL2, CDCA2, ECT2, TPX2, NCAPH, KIF4A, ASPM, FBXO5, UBE2S, RACGAP1, BIRC5, INCENP, KIF11, KIFC1, MAD2L1, NEK2, CUZD1, NUSAP1, PGF, PLK1, SEPT5, ANLN, FAM64A, ERCC6L, SPDL1, CDCA8, CEP55, MIS18BP1, SPC25, NCAPG, STIL, AURKA, BUB1, BUB1B, TOP2A, TTK, WEE1, E2F8, BORA, FAM83D, CDCA3, NUF2, PARD6G, PSRC1, CCNA2, CCNB1, CCNF, CCN…	384	629	52364	1.17937e-53	6.41107e-50	2.78742e-51
cellular_component	GO:0044422	organelle part	208	PLA2G4B, ARPC4-TTLL3, ARPC5, C7orf55-LUC7L2, KIF20A, CDKN1A, NDC80, TACC3, CEBPB, CENPA, ST6GALNAC2, SPAG5, TGOLN2, CENPE, CENPF, CFL2, DBF4, KIF2C, UBE2C, ADAMTS7, OSBPL8, MRPL10, PLK3, SPATA18, COX15, HNRNPA1L2, KIF18B, MANEAL, CKAP2L, SGOL2, CDCA2, DDB2, DDIT3, DPYSL2, E2F1, E2F2, ECT2, ELF2, HACD2, AK1, ALDH3A1, ACSL4, FDXR, TPX2, MRPS27, ARL6IP1, NCAPH, ISCU, KIF4A, LSM4, RNF19A, ASPM, ZNF38…	248	7916	45077	1.29934e-53	7.06323e-50	2.94301e-51
cellular_component	GO:0044446	intracellular organelle part	205	PLA2G4B, ARPC4-TTLL3, ARPC5, C7orf55-LUC7L2, KIF20A, CDKN1A, NDC80, TACC3, CEBPB, CENPA, ST6GALNAC2, SPAG5, TGOLN2, CENPE, CENPF, CFL2, DBF4, KIF2C, UBE2C, ADAMTS7, OSBPL8, MRPL10, PLK3, SPATA18, COX15, HNRNPA1L2, KIF18B, MANEAL, CKAP2L, SGOL2, CDCA2, DDB2, DDIT3, DPYSL2, E2F1, E2F2, ECT2, ELF2, HACD2, ALDH3A1, ACSL4, FDXR, TPX2, MRPS27, ARL6IP1, NCAPH, ISCU, KIF4A, LSM4, RNF19A, ASPM, ZNF385A, P…	251	7705	45288	1.76183e-53	9.57728e-50	3.8163e-51
biological_process	GO:0071704	organic substance metabolic process	238	PLA2G4B, ARPC4-TTLL3, ABHD14A-ACY1, UBE2F-SCLY, PTPRU, C7orf55-LUC7L2, TOB1, CDKN1A, LOC102724428, CDKN2C, CDKN3, CEBPB, MXD4, ST6GALNAC2, TRIM3, CENPE, CENPF, DBF4, PNRC1, UBE2C, PRSS23, ATE1, ADAMTS7, CYGB, OSBPL8, MRPL10, PLK3, RNF19B, KLF6, SPATA18, COX15, MIB2, HNRNPA1L2, ZFP90, CDCA2, DDB2, GADD45A, DDIT3, DPYSL2, E2F1, E2F2, ECT2, DCP1B, ELF2, HACD2, AK1, ALDH3A1, ACSL4, FDXR, HSPA4L, TPX2…	218	10335	42658	1.82531e-53	9.92238e-50	3.8163e-51
biological_process	GO:0016043	cellular component organization	179	ARPC4-TTLL3, ARPC5, C7orf55-LUC7L2, KIF20A, CDKN1A, CDKN2C, NDC80, TACC3, DPYSL4, CENPA, SPAG5, CENPE, CENPF, CFL2, KIF2C, UBE2C, ADAMTS7, OSBPL8, MRPL10, PLK3, SPATA18, COX15, RTN4RL1, KIF18B, CDCA2, DDB2, GADD45A, DPYSL2, E2F1, ECT2, STOM, ACSL4, TPX2, MRPS27, ARL6IP1, NCAPH, ISCU, CORO1C, PLXNB2, FLRT2, KIF4A, FYB, LSM4, RNF19A, ASPM, ZNF385A, PHF19, FBXO5, NUPR1, NSG1, GCLM, UBE2S, BLOC1S2, A…	277	5864	47129	2.10748e-53	1.14563e-49	4.24307e-51
biological_process	GO:0007067	mitotic nuclear division	62	NDC80, SPAG5, CENPE, CENPF, KIF2C, UBE2C, KIF18B, CDCA2, TPX2, NCAPH, KIF4A, ASPM, FBXO5, UBE2S, RACGAP1, BIRC5, INCENP, KIF11, KIFC1, KIF22, MAD2L1, NEK2, NUSAP1, PLK1, ANLN, FAM64A, ERCC6L, SPDL1, CDCA8, CEP55, MIS18BP1, KIF15, SPC25, NCAPG, AURKA, BUB1, BUB1B, TTK, WEE1, BORA, FAM83D, KIF18A, CDCA3, NUF2, PSRC1, CCNA2, CCNB1, CCNF, CCNG1, KNSTRN, CCNB2, NEK9, AURKB, PTTG1, KIF23, ESPL1, CDK1, …	394	402	52591	5.51822e-53	2.99971e-49	1.07132e-50
biological_process	GO:0071840	cellular component organization or biogenesis	180	ARPC4-TTLL3, ARPC5, C7orf55-LUC7L2, KIF20A, CDKN1A, CDKN2C, NDC80, TACC3, DPYSL4, CENPA, SPAG5, CENPE, CENPF, CFL2, KIF2C, UBE2C, ADAMTS7, OSBPL8, MRPL10, PLK3, SPATA18, COX15, RTN4RL1, KIF18B, CDCA2, DDB2, GADD45A, DPYSL2, E2F1, ECT2, STOM, ACSL4, TPX2, MRPS27, ARL6IP1, NCAPH, ISCU, CORO1C, PLXNB2, FLRT2, KIF4A, FYB, LSM4, RNF19A, ASPM, ZNF385A, PHF19, FBXO5, NUPR1, NSG1, GCLM, UBE2S, BLOC1S2, A…	276	5991	47002	8.68434e-53	4.72081e-49	1.62786e-50
biological_process	GO:0044238	primary metabolic process	232	PLA2G4B, ARPC4-TTLL3, ABHD14A-ACY1, UBE2F-SCLY, PTPRU, C7orf55-LUC7L2, TOB1, CDKN1A, LOC102724428, CDKN2C, CDKN3, CEBPB, MXD4, ST6GALNAC2, TRIM3, CENPE, CENPF, DBF4, PNRC1, UBE2C, PRSS23, ATE1, ADAMTS7, CYGB, OSBPL8, MRPL10, PLK3, RNF19B, KLF6, SPATA18, COX15, MIB2, HNRNPA1L2, ZFP90, CDCA2, DDB2, GADD45A, DDIT3, DPYSL2, E2F1, E2F2, ECT2, DCP1B, ELF2, HACD2, AK1, ACSL4, FDXR, HSPA4L, TPX2, MRPS27,…	224	9984	43009	2.67972e-52	1.4567e-48	4.85565e-50
biological_process	GO:0044237	cellular metabolic process	232	PLA2G4B, ARPC4-TTLL3, ABHD14A-ACY1, UBE2F-SCLY, PTPRU, C7orf55-LUC7L2, TOB1, CDKN1A, LOC102724428, CDKN2C, CDKN3, CEBPB, MXD4, ST6GALNAC2, TRIM3, CENPE, CENPF, DBF4, PNRC1, UBE2C, ATE1, ADAMTS7, CYGB, OSBPL8, MRPL10, PLK3, RNF19B, KLF6, SPATA18, COX15, MIB2, HNRNPA1L2, ZFP90, CDCA2, DGKA, DDB2, GADD45A, DDIT3, DPYSL2, E2F1, E2F2, ECT2, DCP1B, ELF2, HACD2, AK1, STOM, ALDH3A1, ACSL4, FDXR, HSPA4L, …	224	10042	42951	7.45644e-52	4.05332e-48	1.30752e-49
cellular_component	GO:0044444	cytoplasmic part	202	PLA2G4B, C15orf38-AP3S2, ARPC5, KIF20A, CDKN1A, CDKN2C, CDKN3, NDC80, DPYSL4, CENPA, ST6GALNAC2, TRIM3, TGOLN2, CENPE, CENPF, CFL2, KIF2C, UBE2C, ADAMTS7, CYGB, OSBPL8, MRPL10, PLK3, RNF19B, SPATA18, CMBL, COX15, CRIP2, MIB2, KIF18B, MANEAL, SGOL2, DGKA, DDIT3, DPYSL2, ECT2, DCP1B, HACD2, AK1, STOM, ALDH3A1, ACSL4, FDXR, HSPA4L, MRPS27, ARL6IP1, ASTN2, NCAPH, ISCU, KIF4A, FYB, LSM4, GAMT, FBXO22,…	254	7766	45227	5.96394e-51	3.242e-47	1.01312e-48
biological_process	GO:0000280	nuclear division	65	NDC80, SPAG5, CENPE, CENPF, KIF2C, UBE2C, KIF18B, CDCA2, TPX2, NCAPH, KIF4A, ASPM, FBXO5, UBE2S, RACGAP1, BIRC5, INCENP, KIF11, KIFC1, KIF22, MAD2L1, MKI67, NEK2, NUSAP1, PLK1, ANLN, FAM64A, ERCC6L, SPDL1, CDCA8, CEP55, MIS18BP1, CYP26B1, KIF15, SPC25, NCAPG, AURKA, BUB1, BUB1B, TOP2A, TTK, WEE1, BORA, FAM83D, KIF18A, CDCA3, NUF2, PSRC1, CCNA2, CCNB1, CCNF, CCNG1, KNSTRN, CCNB2, NEK9, AURKB, PTTG…	391	522	52471	2.31077e-50	1.25613e-46	3.80647e-48
cellular_component	GO:0005634	nucleus	185	C7orf55-LUC7L2, KIF20A, TOB1, CDKN1A, CDKN2C, CDKN3, NDC80, CEBPB, CENPA, MXD4, SPAG5, TGOLN2, CENPE, CENPF, CFL2, DBF4, PNRC1, KIF2C, UBE2C, PRSS23, ATE1, OSBPL8, MRPL10, PLK3, KLF6, HNRNPA1L2, ZFP90, KIF18B, SGOL2, CDCA2, DDB2, GADD45A, DDIT3, E2F1, E2F2, ECT2, DCP1B, ELF2, ALDH3A1, HSPA4L, TPX2, NCAPH, ISCU, KIF4A, FYB, HYPK, LSM4, ASPM, ZNF385A, PHF19, ZNF337, FBXO22, FBXO5, NUPR1, NSG1, SESN…	271	6630	46363	6.16106e-50	3.34915e-46	9.85045e-48
biological_process	GO:0048285	organelle fission	66	NDC80, SPAG5, CENPE, CENPF, KIF2C, UBE2C, KIF18B, CDCA2, TPX2, NCAPH, KIF4A, ASPM, FBXO5, UBE2S, RACGAP1, BIRC5, INCENP, KIF11, KIFC1, KIF22, MAD2L1, MKI67, NEK2, NUSAP1, PLK1, ANLN, FAM64A, ERCC6L, SPDL1, CDCA8, CEP55, MIS18BP1, CYP26B1, KIF15, SPC25, PEX19, NCAPG, AURKA, BUB1, BUB1B, TOP2A, TTK, WEE1, BORA, FAM83D, KIF18A, CDCA3, NUF2, PSRC1, CCNA2, CCNB1, CCNF, CCNG1, KNSTRN, CCNB2, NEK9, AURK…	390	557	52436	6.38947e-50	3.47332e-46	9.92376e-48
biological_process	GO:0050896	response to stimulus	203	PLA2G4B, ARL17B, PTPRU, ARPC5, TOB1, CDKN1A, LOC102724428, NDC80, TACC3, CEBPB, DPYSL4, CENPA, CENPE, CENPF, KIF2C, ADAMTS7, CYGB, OSBPL8, PLK3, RNF19B, KLF6, SPATA18, MIB2, RTN4RL1, SGOL2, DGKA, DDB2, GADD45A, DDIT3, DPYSL2, E2F1, E2F2, ECT2, STOM, ALDH3A1, ACSL4, VWCE, FDXR, HSPA4L, ICOSLG, CORO1C, PHLDA3, PLXNB2, FLRT2, KIF4A, FYB, LSM4, ASPM, ZNF385A, FBXO22, NUPR1, CYFIP2, NSG1, SESN1, GCLM,…	253	8149	44844	2.30559e-48	1.25332e-44	3.48144e-46
biological_process	GO:0043170	macromolecule metabolic process	208	PLA2G4B, ARPC4-TTLL3, ABHD14A-ACY1, UBE2F-SCLY, PTPRU, C7orf55-LUC7L2, TOB1, CDKN1A, LOC102724428, CDKN2C, CDKN3, CEBPB, MXD4, ST6GALNAC2, TRIM3, CENPE, CENPF, DBF4, PNRC1, UBE2C, PRSS23, ATE1, ADAMTS7, CYGB, OSBPL8, MRPL10, PLK3, RNF19B, KLF6, SPATA18, MIB2, HNRNPA1L2, ZFP90, CDCA2, DDB2, GADD45A, DDIT3, E2F1, E2F2, ECT2, DCP1B, ELF2, HSPA4L, TPX2, MRPS27, ISCU, CORO1C, PLXNB2, FYB, LSM4, RNF19A…	248	8830	44163	4.29113e-46	2.33266e-42	6.30447e-44
biological_process	GO:0044260	cellular macromolecule metabolic process	198	PLA2G4B, ARPC4-TTLL3, UBE2F-SCLY, PTPRU, C7orf55-LUC7L2, TOB1, CDKN1A, LOC102724428, CDKN2C, CDKN3, CEBPB, MXD4, ST6GALNAC2, TRIM3, CENPE, CENPF, DBF4, PNRC1, UBE2C, ATE1, ADAMTS7, OSBPL8, MRPL10, PLK3, RNF19B, KLF6, SPATA18, MIB2, HNRNPA1L2, ZFP90, CDCA2, DDB2, GADD45A, DDIT3, E2F1, E2F2, ECT2, DCP1B, ELF2, HSPA4L, TPX2, MRPS27, CORO1C, PLXNB2, FYB, LSM4, RNF19A, ZNF385A, PHF19, ZNF337, FBXO22, …	258	8151	44842	3.24344e-45	1.76313e-41	4.63982e-43
biological_process	GO:0006996	organelle organization	129	ARPC4-TTLL3, ARPC5, KIF20A, NDC80, TACC3, CENPA, SPAG5, CENPE, CENPF, CFL2, KIF2C, UBE2C, ADAMTS7, OSBPL8, MRPL10, PLK3, SPATA18, KIF18B, CDCA2, DDB2, GADD45A, DPYSL2, E2F1, ECT2, STOM, TPX2, MRPS27, NCAPH, CORO1C, KIF4A, LSM4, RNF19A, ASPM, ZNF385A, PHF19, FBXO5, NSG1, GCLM, UBE2S, BLOC1S2, ANG, GAS2L3, GPX1, RACGAP1, UHRF1, GPSM2, H2AFX, HMGB2, BIRC5, ARPIN, INCENP, KIF11, KIFC1, KIF22, MAD2L1,…	327	3467	49526	3.68805e-45	2.00483e-41	5.14058e-43
biological_process	GO:1902589	single-organism organelle organization	108	ARPC4-TTLL3, ARPC5, KIF20A, NDC80, TACC3, CENPA, SPAG5, CENPE, CENPF, CFL2, KIF2C, UBE2C, ADAMTS7, MRPL10, PLK3, SPATA18, KIF18B, CDCA2, DDB2, GADD45A, E2F1, ECT2, STOM, TPX2, MRPS27, NCAPH, CORO1C, KIF4A, LSM4, RNF19A, ASPM, PHF19, FBXO5, UBE2S, BLOC1S2, ANG, GAS2L3, RACGAP1, UHRF1, GPSM2, HMGB2, BIRC5, ARPIN, INCENP, KIF11, KIFC1, KIF22, MAD2L1, MKI67, NEFL, NEK2, PCNA, NUSAP1, PLK1, PMAIP1, AN…	348	2481	50512	4.54454e-43	2.47041e-39	6.17603e-41
cellular_component	GO:0043228	non-membrane-bounded organelle	127	ARPC4-TTLL3, ARPC5, KIF20A, NDC80, TACC3, CEBPB, CENPA, SPAG5, CENPE, CENPF, CFL2, KIF2C, MRPL10, PLK3, KIF18B, CKAP2L, SGOL2, CDCA2, DPYSL2, E2F1, ECT2, DCP1B, STOM, ACSL4, TPX2, MRPS27, NCAPH, CORO1C, KIF4A, FYB, LSM4, RNF19A, ASPM, ZNF385A, FBXO22, FBXO5, BLOC1S2, ANG, GAS2L3, RACGAP1, UHRF1, H2AFX, HMGB2, BIRC5, INCENP, KIF11, KIFC1, KIF22, LMNB1, MAD2L1, MCM6, MDM2, KITLG, MKI67, ATF3, NEFL,…	329	3645	49348	1.64199e-41	8.92587e-38	2.12521e-39
cellular_component	GO:0043232	intracellular non-membrane-bounded organelle	127	ARPC4-TTLL3, ARPC5, KIF20A, NDC80, TACC3, CEBPB, CENPA, SPAG5, CENPE, CENPF, CFL2, KIF2C, MRPL10, PLK3, KIF18B, CKAP2L, SGOL2, CDCA2, DPYSL2, E2F1, ECT2, DCP1B, STOM, ACSL4, TPX2, MRPS27, NCAPH, CORO1C, KIF4A, FYB, LSM4, RNF19A, ASPM, ZNF385A, FBXO22, FBXO5, BLOC1S2, ANG, GAS2L3, RACGAP1, UHRF1, H2AFX, HMGB2, BIRC5, INCENP, KIF11, KIFC1, KIF22, LMNB1, MAD2L1, MCM6, MDM2, KITLG, MKI67, ATF3, NEFL,…	329	3645	49348	1.64199e-41	8.92587e-38	2.12521e-39
biological_process	GO:0051716	cellular response to stimulus	171	PLA2G4B, ARL17B, PTPRU, ARPC5, TOB1, CDKN1A, LOC102724428, NDC80, CEBPB, CENPA, CENPE, CENPF, KIF2C, ADAMTS7, OSBPL8, PLK3, KLF6, SPATA18, MIB2, RTN4RL1, SGOL2, DGKA, DDB2, GADD45A, DDIT3, DPYSL2, E2F1, E2F2, ECT2, STOM, VWCE, FDXR, CORO1C, PHLDA3, PLXNB2, FYB, LSM4, ASPM, ZNF385A, FBXO22, NUPR1, CYFIP2, NSG1, SESN1, GCLM, BLOC1S2, GPX1, GRIN2C, RACGAP1, UHRF1, GPSM2, CDIP1, H2AFX, HMGB2, BIRC5, …	285	6825	46168	2.31668e-39	1.25935e-35	2.92871e-37
cellular_component	GO:0032991	macromolecular complex	141	ARPC4-TTLL3, C15orf38-AP3S2, ARPC5, C7orf55-LUC7L2, KIF20A, TOB1, CDKN1A, NDC80, CEBPB, CENPA, SPAG5, CENPE, CENPF, KIF2C, UBE2C, MRPL10, PLK3, RNF19B, COX15, MIB2, HNRNPA1L2, KIF18B, SGOL2, DDB2, DDIT3, DPYSL2, E2F1, E2F2, ECT2, DCP1B, TPX2, MRPS27, ARL6IP1, NCAPH, CORO1C, KIF4A, LSM4, RNF19A, ASPM, ZNF385A, PHF19, GCLM, UBE2S, BLOC1S2, ANG, GAS2L3, GRIN2C, RACGAP1, UHRF1, GTF2A1, H2AFX, HMGB2, …	315	4779	48214	9.12747e-39	4.96169e-35	1.12766e-36
biological_process	GO:0048518	positive regulation of biological process	148	ARPC4-TTLL3, ARPC5, TBC1D3G, TOB1, CDKN1A, CEBPB, CENPE, CFL2, DBF4, UBE2C, OSBPL8, PLK3, RNF19B, KLF6, CRIP2, MIB2, ZFP90, CDCA2, GADD45A, DDIT3, DPYSL2, E2F1, ECT2, ELF2, STOM, ALDH3A1, ACSL4, VWCE, TPX2, ICOSLG, CORO1C, PHLDA3, PLXNB2, FLRT2, FYB, RNF19A, ASPM, ZNF385A, PHF19, FBXO22, FBXO5, NUPR1, CYFIP2, NSG1, GCLM, UBE2S, BLOC1S2, ANG, GPX1, GRIN2C, RACGAP1, UHRF1, SERTAD1, HMGB2, HOXA3, HO…	308	5287	47706	2.0128e-38	1.09416e-34	2.43146e-36
biological_process	GO:0007059	chromosome segregation	43	NDC80, SPAG5, CENPE, CENPF, KIF2C, UBE2C, KIF18B, SGOL2, CDCA2, ECT2, NCAPH, FBXO5, RACGAP1, BIRC5, INCENP, KIF11, KIFC1, KIF22, MAD2L1, NEK2, NUSAP1, PLK1, SPDL1, CDCA8, CEP55, HJURP, SPC25, NCAPG, BUB1, BUB1B, TOP2A, TTK, FAM83D, KIF18A, PSRC1, CCNB1, KNSTRN, AURKB, PTTG1, ESPL1, CDC20, NCAPD2, KIF14	413	250	52743	2.81924e-38	1.53254e-34	3.3316e-36
biological_process	GO:0048522	positive regulation of cellular process	135	ARPC4-TTLL3, ARPC5, TOB1, CDKN1A, CEBPB, CENPE, CFL2, UBE2C, OSBPL8, PLK3, RNF19B, KLF6, CRIP2, MIB2, ZFP90, CDCA2, GADD45A, DDIT3, DPYSL2, E2F1, ECT2, ELF2, STOM, ALDH3A1, ACSL4, VWCE, TPX2, ICOSLG, CORO1C, PHLDA3, PLXNB2, FLRT2, RNF19A, ASPM, ZNF385A, PHF19, FBXO22, FBXO5, NUPR1, CYFIP2, NSG1, UBE2S, BLOC1S2, ANG, GPX1, GRIN2C, RACGAP1, UHRF1, SERTAD1, HMGB2, HOXA3, HOXC13, BIRC5, ACER2, ARPIN,…	321	4536	48457	2.77328e-37	1.50756e-33	3.20756e-35
cellular_component	GO:0043234	protein complex	127	ARPC4-TTLL3, C15orf38-AP3S2, ARPC5, KIF20A, TOB1, CDKN1A, NDC80, CENPA, SPAG5, CENPE, CENPF, KIF2C, UBE2C, RNF19B, COX15, MIB2, KIF18B, SGOL2, DDB2, DDIT3, DPYSL2, E2F1, E2F2, ECT2, TPX2, ARL6IP1, NCAPH, CORO1C, KIF4A, RNF19A, ASPM, PHF19, GCLM, UBE2S, BLOC1S2, ANG, GAS2L3, GRIN2C, RACGAP1, GTF2A1, H2AFX, HMGB2, BIRC5, IGFBP3, FAS, IL6, INCENP, KIF11, KIFC1, KIF22, LMNB1, MAD2L1, SMAD7, MCM6, MDM…	329	4115	48878	2.49592e-36	1.35678e-32	2.82663e-34
cellular_component	GO:0005819	spindle	43	KIF20A, SPAG5, CENPE, CENPF, KIF18B, CKAP2L, ECT2, TPX2, KIF4A, ASPM, FBXO5, RACGAP1, BIRC5, INCENP, KIF11, KIFC1, KIF22, MAD2L1, NEK2, NUSAP1, PLK1, SPDL1, CDCA8, KIF15, RANGAP1, AURKA, TTK, TBL1XR1, BORA, FAM83D, KIF18A, FAM110A, PSRC1, CCNB1, KNSTRN, PRC1, AURKB, KIF23, ESPL1, DLGAP5, CDK1, CDC20, KIF14	413	284	52709	3.11693e-36	1.69436e-32	3.45788e-34
cellular_component	GO:0005829	cytosol	111	PLA2G4B, ARPC5, CDKN1A, CDKN2C, NDC80, DPYSL4, CENPA, CENPE, CENPF, KIF2C, UBE2C, CYGB, CMBL, SGOL2, DGKA, DDIT3, DPYSL2, ECT2, DCP1B, AK1, ALDH3A1, HSPA4L, ARL6IP1, NCAPH, ISCU, KIF4A, FYB, LSM4, GAMT, FBXO5, CYFIP2, SESN1, GCLM, BLOC1S2, GPX1, RACGAP1, BIRC5, INCENP, INPP1, ITPK1, KIF11, KIF22, KPNA2, MAD2L1, SMAD7, MDM2, NEFL, NEK2, RRM2B, PLK1, PMAIP1, ERCC6L, SPDL1, PPP1R3C, CDCA8, NADSYN1, …	345	3151	49842	3.25289e-36	1.76827e-32	3.53654e-34
biological_process	GO:0051726	regulation of cell cycle	64	CDKN1A, CDKN2C, CDKN3, TACC3, SPAG5, CENPE, CENPF, UBE2C, PLK3, GADD45A, DDIT3, E2F1, E2F2, ECT2, AK1, TPX2, ASPM, FBXO5, NUPR1, SESN1, GAS2L3, RACGAP1, SERTAD1, BIRC5, KIF11, MAD2L1, MDM2, NEK2, NUSAP1, TRIAP1, PLK1, ANLN, PRKAB1, PRR11, STIL, AURKA, BUB1, BUB1B, TOP2A, TTK, WEE1, XPC, E2F8, BORA, FAM83D, PSRC1, CCNA2, CCNB1, CCNF, CCNG1, TICRR, KNSTRN, CCNB2, AURKB, PTTG1, CCPG1, TP53INP1, KIF2…	392	937	52056	3.28238e-35	1.7843e-31	3.49863e-33
biological_process	GO:0019222	regulation of metabolic process	158	TBC1D3G, TOB1, CDKN1A, CDKN2C, CDKN3, CEBPB, MXD4, CENPE, CENPF, DBF4, PNRC1, UBE2C, CYGB, OSBPL8, PLK3, RNF19B, KLF6, ZFP90, CDCA2, GADD45A, DDIT3, E2F1, E2F2, ECT2, DCP1B, ELF2, TPX2, CORO1C, PLXNB2, RNF19A, ZNF385A, PHF19, ZNF337, FBXO22, FBXO5, NUPR1, CYFIP2, NSG1, GCLM, UBE2S, APOBEC3C, BLOC1S2, ANG, GPX1, GRIN2C, RACGAP1, UHRF1, GTF2A1, GPSM2, SERTAD1, H2AFX, HMGB2, HOXA3, HOXC13, BIRC5, AC…	298	6510	46483	3.19616e-34	1.73743e-30	3.34122e-32
cellular_component	GO:0015630	microtubule cytoskeleton	64	KIF20A, TACC3, SPAG5, CENPE, CENPF, KIF2C, PLK3, KIF18B, CKAP2L, DPYSL2, ECT2, TPX2, KIF4A, RNF19A, ASPM, FBXO5, BLOC1S2, GAS2L3, RACGAP1, BIRC5, INCENP, KIF11, KIFC1, KIF22, MAD2L1, NEK2, PCNA, NUSAP1, GTSE1, PLK1, ERCC6L, SPDL1, CDCA8, CEP55, SPATA7, KIF15, SHTN1, RANGAP1, NCAPG, CCDC14, STIL, AURKA, BUB1B, TOP2A, TTK, TUBA4A, TBL1XR1, BORA, FAM83D, KIF18A, FAM110A, PSRC1, CCNB1, CCNF, KNSTRN, …	392	1034	51959	6.55677e-33	3.56426e-29	6.72502e-31
biological_process	GO:0006950	response to stress	117	PLA2G4B, ARPC5, CDKN1A, TACC3, CEBPB, CENPE, KIF2C, ADAMTS7, CYGB, PLK3, RNF19B, KLF6, SPATA18, RTN4RL1, DGKA, DDB2, GADD45A, DDIT3, E2F1, ECT2, STOM, ALDH3A1, HSPA4L, PHLDA3, KIF4A, LSM4, ZNF385A, FBXO22, NUPR1, CYFIP2, SESN1, GCLM, APOBEC3C, ANG, GPX1, GRIN2C, C1GALT1C1, RACGAP1, UHRF1, CDIP1, H2AFX, HMGB2, FAS, IL6, INHBB, ITPK1, KIF11, KIFC1, KIF22, SMAD7, MDM2, KITLG, MKI67, ACHE, ATF3, NEFL…	339	3879	49114	2.68308e-32	1.45852e-28	2.70097e-30
cellular_component	GO:0044428	nuclear part	115	C7orf55-LUC7L2, KIF20A, CDKN1A, NDC80, CEBPB, CENPA, SPAG5, TGOLN2, CENPF, CFL2, DBF4, UBE2C, OSBPL8, MRPL10, PLK3, HNRNPA1L2, KIF18B, SGOL2, CDCA2, DDB2, DDIT3, E2F1, E2F2, ECT2, ELF2, ALDH3A1, TPX2, KIF4A, LSM4, ZNF385A, PHF19, FBXO5, UBE2S, ANG, RACGAP1, UHRF1, GTF2A1, H2AFX, HMGB2, HOXA3, BIRC5, INCENP, KIF22, KPNA2, LMNB1, MAD2L1, SMAD7, MCM6, MDM2, MEF2D, ARVCF, MKI67, ATF3, NEK2, NFIC, NRF…	341	3765	49228	3.63908e-32	1.97821e-28	3.59674e-30
biological_process	GO:0000819	sister chromatid segregation	31	NDC80, SPAG5, CENPE, KIF2C, UBE2C, KIF18B, NCAPH, FBXO5, KIFC1, KIF22, MAD2L1, NEK2, NUSAP1, PLK1, SPDL1, CDCA8, CEP55, NCAPG, BUB1, BUB1B, TOP2A, TTK, KIF18A, PSRC1, CCNB1, KNSTRN, PTTG1, ESPL1, CDC20, NCAPD2, KIF14	425	120	52873	3.85692e-32	2.09662e-28	3.74397e-30
biological_process	GO:0098813	nuclear chromosome segregation	34	NDC80, SPAG5, CENPE, KIF2C, UBE2C, KIF18B, ECT2, NCAPH, FBXO5, RACGAP1, KIFC1, KIF22, MAD2L1, NEK2, NUSAP1, PLK1, SPDL1, CDCA8, CEP55, NCAPG, BUB1, BUB1B, TOP2A, TTK, KIF18A, PSRC1, CCNB1, KNSTRN, AURKB, PTTG1, ESPL1, CDC20, NCAPD2, KIF14	422	173	52820	6.97825e-32	3.79338e-28	6.65505e-30
cellular_component	GO:0044430	cytoskeletal part	71	ARPC4-TTLL3, ARPC5, KIF20A, TACC3, SPAG5, CENPE, CENPF, KIF2C, PLK3, KIF18B, CKAP2L, DPYSL2, ECT2, TPX2, KIF4A, RNF19A, ASPM, FBXO5, BLOC1S2, GAS2L3, RACGAP1, BIRC5, INCENP, KIF11, KIFC1, KIF22, LMNB1, MAD2L1, NEFL, NEK2, PCNA, NUSAP1, GTSE1, PLK1, ANLN, ERCC6L, SPDL1, CDCA8, CEP55, SPATA7, KIF15, SHTN1, RANGAP1, NCAPG, CCDC14, STIL, AURKA, BUB1B, TOP2A, TPM3, TTK, TUBA4A, TBL1XR1, BORA, FAM83D, …	385	1399	51594	1.5572e-31	8.46496e-28	1.45948e-29
biological_process	GO:0000070	mitotic sister chromatid segregation	30	NDC80, SPAG5, CENPE, KIF2C, UBE2C, KIF18B, NCAPH, FBXO5, KIFC1, KIF22, MAD2L1, NEK2, NUSAP1, PLK1, SPDL1, CDCA8, CEP55, NCAPG, BUB1, BUB1B, TTK, KIF18A, PSRC1, CCNB1, KNSTRN, PTTG1, ESPL1, CDC20, NCAPD2, KIF14	426	112	52881	1.73562e-31	9.43486e-28	1.59913e-29
biological_process	GO:0048519	negative regulation of biological process	122	PTPRU, TOB1, CDKN1A, CDKN2C, CDKN3, TACC3, CEBPB, MXD4, CENPF, UBE2C, ADAMTS7, CYGB, OSBPL8, PLK3, ZFP90, GADD45A, DDIT3, E2F1, ELF2, AK1, ACSL4, ASTN2, CORO1C, PHLDA3, ASPM, ZNF385A, PHF19, FBXO5, NUPR1, SESN1, GCLM, APOBEC3C, ANG, GAS2L3, GPX1, GRIN2C, UHRF1, SERTAD1, H2AFX, HMGB2, BIRC5, ACER2, ARPIN, IGFBP3, FAS, IL6, IL11, INHBB, MAD2L1, SMAD7, MDM2, KITLG, ACHE, ASPH, ATF3, NEFL, NEK2, NFIC…	334	4352	48641	6.24957e-31	3.39726e-27	5.66211e-29
biological_process	GO:0060255	regulation of macromolecule metabolic process	140	TOB1, CDKN1A, CDKN2C, CDKN3, CEBPB, MXD4, CENPE, CENPF, PNRC1, UBE2C, CYGB, OSBPL8, PLK3, RNF19B, KLF6, ZFP90, CDCA2, GADD45A, DDIT3, E2F1, E2F2, ECT2, ELF2, TPX2, CORO1C, PLXNB2, RNF19A, ZNF385A, PHF19, ZNF337, FBXO22, FBXO5, NUPR1, CYFIP2, NSG1, UBE2S, APOBEC3C, BLOC1S2, ANG, GPX1, GRIN2C, UHRF1, GTF2A1, SERTAD1, H2AFX, HMGB2, HOXA3, HOXC13, BIRC5, ACER2, IGFBP3, FAS, IL6, IL11, INHBB, KPNA2, M…	316	5616	47377	6.9958e-31	3.80292e-27	6.23429e-29
cellular_component	GO:0005856	cytoskeleton	81	ARPC4-TTLL3, ARPC5, KIF20A, TACC3, SPAG5, CENPE, CENPF, CFL2, KIF2C, PLK3, KIF18B, CKAP2L, DPYSL2, ECT2, STOM, TPX2, CORO1C, KIF4A, FYB, RNF19A, ASPM, FBXO5, BLOC1S2, GAS2L3, RACGAP1, BIRC5, INCENP, KIF11, KIFC1, KIF22, LMNB1, MAD2L1, KITLG, NEFL, NEK2, PCNA, NUSAP1, GTSE1, PLK1, SEPT5, ANLN, ERCC6L, SPDL1, CDCA8, CEP55, SPATA7, KIF15, SHTN1, ANKRA2, ACTA2, RANGAP1, NCAPG, CCDC14, STIL, AURKA, BU…	375	1924	51069	8.08644e-31	4.39579e-27	7.08998e-29
biological_process	GO:0000226	microtubule cytoskeleton organization	44	KIF20A, NDC80, TACC3, CENPA, SPAG5, CENPE, KIF2C, PLK3, KIF18B, GADD45A, ECT2, TPX2, KIF4A, RNF19A, ASPM, FBXO5, GAS2L3, RACGAP1, GPSM2, BIRC5, KIF11, KIFC1, NEFL, NEK2, NUSAP1, PLK1, SPDL1, SPC25, STIL, AURKA, TTK, WEE1, BORA, KIF18A, PSRC1, CCNB1, CCNF, KNSTRN, PRC1, AURKB, KIF23, ESPL1, CDK1, KIF14	412	426	52567	8.3747e-31	4.55249e-27	7.22617e-29
biological_process	GO:0019538	protein metabolic process	136	PLA2G4B, ARPC4-TTLL3, ABHD14A-ACY1, UBE2F-SCLY, PTPRU, TOB1, CDKN1A, LOC102724428, CDKN2C, CDKN3, CEBPB, ST6GALNAC2, TRIM3, CENPE, UBE2C, PRSS23, ATE1, ADAMTS7, OSBPL8, MRPL10, PLK3, RNF19B, SPATA18, MIB2, CDCA2, DDB2, GADD45A, DDIT3, ECT2, HSPA4L, TPX2, MRPS27, ISCU, CORO1C, PLXNB2, FYB, RNF19A, ZNF385A, PHF19, FBXO22, FBXO5, NUPR1, CYFIP2, UBE2S, ANG, GPX1, GRIN2C, C1GALT1C1, UHRF1, SERTAD1, BI…	320	5374	47619	1.63386e-30	8.88169e-27	1.38776e-28
biological_process	GO:0048523	negative regulation of cellular process	116	PTPRU, TOB1, CDKN1A, CDKN2C, CDKN3, TACC3, CEBPB, MXD4, CENPF, UBE2C, ADAMTS7, CYGB, OSBPL8, PLK3, ZFP90, GADD45A, DDIT3, E2F1, ELF2, AK1, ASTN2, CORO1C, PHLDA3, ASPM, ZNF385A, PHF19, FBXO5, NUPR1, SESN1, GCLM, APOBEC3C, ANG, GAS2L3, GPX1, UHRF1, SERTAD1, H2AFX, HMGB2, BIRC5, ACER2, ARPIN, IGFBP3, FAS, IL6, IL11, INHBB, MAD2L1, SMAD7, MDM2, KITLG, ACHE, ASPH, ATF3, NEFL, NEK2, NFIC, RRM2B, ZBTB7A…	340	4013	48980	2.13967e-30	1.16312e-26	1.78942e-28
cellular_component	GO:0031974	membrane-enclosed lumen	118	KIF20A, CDKN1A, NDC80, CEBPB, CENPA, SPAG5, TGOLN2, CENPF, CFL2, DBF4, UBE2C, ADAMTS7, MRPL10, PLK3, KIF18B, SGOL2, CDCA2, DDB2, DDIT3, E2F1, E2F2, ELF2, ALDH3A1, FDXR, TPX2, ISCU, KIF4A, ZNF385A, PHF19, FBXO5, ANG, GPX1, RACGAP1, UHRF1, GTF2A1, H2AFX, HMGB2, HOXA3, BIRC5, INCENP, KIF22, KPNA2, LMNB1, SMAD7, MCM6, MDM2, MEF2D, ARVCF, MKI67, ASPH, ATF3, NEK2, NFIC, NRF1, RRM2B, AK3, PCNA, NUSAP1, …	338	4149	48844	2.34239e-30	1.27332e-26	1.92928e-28
biological_process	GO:0044267	cellular protein metabolic process	127	PLA2G4B, ARPC4-TTLL3, UBE2F-SCLY, PTPRU, TOB1, CDKN1A, LOC102724428, CDKN2C, CDKN3, ST6GALNAC2, TRIM3, CENPE, UBE2C, ATE1, ADAMTS7, OSBPL8, MRPL10, PLK3, RNF19B, SPATA18, MIB2, CDCA2, DDB2, GADD45A, DDIT3, ECT2, HSPA4L, TPX2, MRPS27, CORO1C, PLXNB2, FYB, RNF19A, ZNF385A, PHF19, FBXO22, FBXO5, NUPR1, CYFIP2, UBE2S, ANG, GPX1, GRIN2C, C1GALT1C1, UHRF1, SERTAD1, BIRC5, ACER2, IGFBP3, FAS, IL6, IL11,…	329	4765	48228	2.65761e-30	1.44468e-26	2.15624e-28
cellular_component	GO:0070013	intracellular organelle lumen	116	KIF20A, CDKN1A, NDC80, CEBPB, CENPA, SPAG5, TGOLN2, CENPF, CFL2, DBF4, UBE2C, ADAMTS7, MRPL10, PLK3, KIF18B, SGOL2, CDCA2, DDB2, DDIT3, E2F1, E2F2, ELF2, ALDH3A1, FDXR, TPX2, ISCU, KIF4A, ZNF385A, PHF19, FBXO5, ANG, GPX1, RACGAP1, UHRF1, GTF2A1, H2AFX, HMGB2, HOXA3, BIRC5, INCENP, KIF22, KPNA2, LMNB1, SMAD7, MCM6, MDM2, MEF2D, ARVCF, MKI67, ASPH, ATF3, NEK2, NFIC, NRF1, RRM2B, AK3, PCNA, NUSAP1, …	340	4040	48953	3.80514e-30	2.06847e-26	3.04187e-28
biological_process	GO:0065009	regulation of molecular function	95	TBC1D3G, CDKN1A, CDKN2C, CDKN3, CENPE, DBF4, UBE2C, CYGB, OSBPL8, ZFP90, GADD45A, DDIT3, E2F1, ECT2, DCP1B, STOM, TPX2, CORO1C, PLXNB2, FBXO5, CYFIP2, GCLM, UBE2S, ANG, GPX1, GRIN2C, RACGAP1, UHRF1, GPSM2, SERTAD1, HMGB2, BIRC5, ACER2, IGFBP3, FAS, IL6, MAD2L1, SMAD7, KITLG, ASPH, NEFL, NEK2, PCNA, TRIAP1, SERPINF1, PLK1, PLXNB3, PMAIP1, PPP1R3C, PPP2R2C, HJURP, DEPDC1, PRKAB1, DEPDC1B, DIABLO, T…	361	2745	50248	4.44057e-30	2.41389e-26	3.4984e-28
cellular_component	GO:0043233	organelle lumen	116	KIF20A, CDKN1A, NDC80, CEBPB, CENPA, SPAG5, TGOLN2, CENPF, CFL2, DBF4, UBE2C, ADAMTS7, MRPL10, PLK3, KIF18B, SGOL2, CDCA2, DDB2, DDIT3, E2F1, E2F2, ELF2, ALDH3A1, FDXR, TPX2, ISCU, KIF4A, ZNF385A, PHF19, FBXO5, ANG, GPX1, RACGAP1, UHRF1, GTF2A1, H2AFX, HMGB2, HOXA3, BIRC5, INCENP, KIF22, KPNA2, LMNB1, SMAD7, MCM6, MDM2, MEF2D, ARVCF, MKI67, ASPH, ATF3, NEK2, NFIC, NRF1, RRM2B, AK3, PCNA, NUSAP1, …	340	4097	48896	1.26176e-29	6.85892e-26	9.79845e-28
biological_process	GO:0007017	microtubule-based process	48	KIF20A, NDC80, TACC3, CENPA, SPAG5, CENPE, KIF2C, PLK3, KIF18B, GADD45A, ECT2, TPX2, KIF4A, RNF19A, ASPM, FBXO5, BLOC1S2, GAS2L3, RACGAP1, GPSM2, BIRC5, KIF11, KIFC1, KIF22, NEFL, NEK2, NUSAP1, PLK1, SPDL1, KIF15, SPC25, STIL, AURKA, TTK, TUBA4A, WEE1, BORA, KIF18A, PSRC1, CCNB1, CCNF, KNSTRN, PRC1, AURKB, KIF23, ESPL1, CDK1, KIF14	408	590	52403	2.22496e-29	1.20949e-25	1.7035e-27
cellular_component	GO:0000793	condensed chromosome	33	NDC80, CEBPB, CENPA, SPAG5, CENPE, CENPF, KIF2C, SGOL2, NCAPH, H2AFX, HMGB2, BIRC5, INCENP, MAD2L1, MKI67, NEK2, PLK1, ERCC6L, SPDL1, MIS18BP1, HJURP, SPC25, RANGAP1, NCAPG, AURKA, BUB1, BUB1B, TOP2A, NUF2, CCNB1, KNSTRN, AURKB, NCAPD2	423	193	52800	3.01462e-29	1.63875e-25	2.27604e-27
biological_process	GO:0009893	positive regulation of metabolic process	104	TBC1D3G, TOB1, CDKN1A, CEBPB, CENPE, DBF4, UBE2C, OSBPL8, PLK3, RNF19B, KLF6, ZFP90, CDCA2, GADD45A, DDIT3, E2F1, ECT2, ELF2, TPX2, CORO1C, RNF19A, PHF19, FBXO22, FBXO5, NUPR1, CYFIP2, NSG1, GCLM, UBE2S, BLOC1S2, ANG, GRIN2C, RACGAP1, UHRF1, SERTAD1, HMGB2, HOXC13, ACER2, IGFBP3, FAS, IL6, IL11, INHBB, SMAD7, MDM2, MEF2D, KITLG, ASPH, ATF3, NEFL, NFIC, NRF1, PCNA, TRIAP1, PLK1, PMAIP1, LGR4, MEG3…	352	3470	49523	3.33386e-28	1.81229e-24	2.48258e-26
biological_process	GO:0007154	cell communication	143	PLA2G4B, ARL17B, PTPRU, ARPC5, TOB1, CDKN1A, LOC102724428, NDC80, CEBPB, CENPA, CENPE, CENPF, KIF2C, ADAMTS7, OSBPL8, PLK3, MIB2, SGOL2, DGKA, GADD45A, DDIT3, DPYSL2, E2F1, E2F2, ECT2, STOM, VWCE, CORO1C, PHLDA3, PLXNB2, FYB, LSM4, ASPM, ZNF385A, FBXO22, NUPR1, CYFIP2, NSG1, SESN1, GCLM, BLOC1S2, GPX1, GRIN2C, RACGAP1, GPSM2, CDIP1, HMGB2, BIRC5, IGFBP3, FAS, IL6, IL11, INCENP, INHBB, INPP1, ITPK…	313	6211	46782	3.75924e-28	2.04352e-24	2.72536e-26
cellular_component	GO:0031981	nuclear lumen	103	KIF20A, CDKN1A, NDC80, CEBPB, CENPA, SPAG5, TGOLN2, CENPF, CFL2, DBF4, UBE2C, MRPL10, PLK3, KIF18B, SGOL2, CDCA2, DDB2, DDIT3, E2F1, E2F2, ELF2, ALDH3A1, TPX2, KIF4A, ZNF385A, PHF19, FBXO5, ANG, RACGAP1, UHRF1, GTF2A1, H2AFX, HMGB2, HOXA3, BIRC5, INCENP, KIF22, KPNA2, LMNB1, SMAD7, MCM6, MDM2, MEF2D, ARVCF, MKI67, ATF3, NEK2, NFIC, NRF1, RRM2B, PCNA, NUSAP1, PLK1, POLH, ANLN, FAM64A, ERCC6L, CDCA…	353	3412	49581	3.76016e-28	2.04402e-24	2.72536e-26
cellular_component	GO:0000779	condensed chromosome, centromeric region	27	NDC80, CEBPB, CENPA, SPAG5, CENPE, CENPF, KIF2C, SGOL2, BIRC5, INCENP, MAD2L1, NEK2, PLK1, ERCC6L, SPDL1, MIS18BP1, HJURP, SPC25, RANGAP1, AURKA, BUB1, BUB1B, NUF2, CCNB1, KNSTRN, AURKB, NCAPD2	429	103	52890	4.13551e-28	2.24806e-24	2.95798e-26
biological_process	GO:0035556	intracellular signal transduction	89	ARL17B, ARPC5, CDKN1A, LOC102724428, NDC80, CEBPB, CENPA, CENPE, CENPF, KIF2C, OSBPL8, PLK3, MIB2, SGOL2, DGKA, GADD45A, DDIT3, E2F1, E2F2, ECT2, PHLDA3, FYB, ZNF385A, NUPR1, CYFIP2, SESN1, GPX1, GRIN2C, RACGAP1, CDIP1, BIRC5, IGFBP3, IL6, IL11, INCENP, INHBB, MAD2L1, SMAD7, MDM2, KITLG, ASPH, ATF3, NEFL, RRM2B, TRIAP1, PLK1, PMAIP1, ERCC6L, SPDL1, CDCA8, G2E3, DEPDC1, DEPDC1B, DIABLO, TMEM9B, GO…	367	2570	50423	4.27928e-28	2.32622e-24	3.02106e-26
biological_process	GO:0080090	regulation of primary metabolic process	135	TOB1, CDKN1A, CDKN2C, CDKN3, CEBPB, MXD4, CENPE, CENPF, PNRC1, UBE2C, OSBPL8, PLK3, RNF19B, KLF6, ZFP90, CDCA2, GADD45A, DDIT3, E2F1, E2F2, ECT2, ELF2, TPX2, CORO1C, PLXNB2, RNF19A, ZNF385A, PHF19, ZNF337, FBXO22, FBXO5, NUPR1, CYFIP2, UBE2S, BLOC1S2, ANG, GPX1, GRIN2C, UHRF1, GTF2A1, SERTAD1, H2AFX, HMGB2, HOXA3, HOXC13, BIRC5, ACER2, IGFBP3, FAS, IL6, IL11, INHBB, KPNA2, MAD2L1, SMAD7, MDM2, ME…	321	5639	47354	6.01363e-28	3.26901e-24	4.19104e-26
biological_process	GO:0031323	regulation of cellular metabolic process	136	TOB1, CDKN1A, CDKN2C, CDKN3, CEBPB, MXD4, CENPE, CENPF, PNRC1, UBE2C, OSBPL8, PLK3, RNF19B, KLF6, ZFP90, CDCA2, GADD45A, DDIT3, E2F1, E2F2, ECT2, ELF2, TPX2, CORO1C, PLXNB2, RNF19A, ZNF385A, PHF19, ZNF337, FBXO22, FBXO5, NUPR1, CYFIP2, NSG1, UBE2S, BLOC1S2, ANG, GPX1, GRIN2C, UHRF1, GTF2A1, SERTAD1, H2AFX, HMGB2, HOXA3, HOXC13, BIRC5, ACER2, IGFBP3, FAS, IL6, IL11, INHBB, KPNA2, MAD2L1, SMAD7, MD…	320	5725	47268	7.32456e-28	3.98163e-24	5.04004e-26
cellular_component	GO:0098687	chromosomal region	35	NDC80, CEBPB, CENPA, SPAG5, CENPE, CENPF, KIF2C, SGOL2, H2AFX, BIRC5, INCENP, KIF22, MAD2L1, MCM6, MKI67, NEK2, PCNA, PLK1, ERCC6L, SPDL1, CDCA8, MIS18BP1, HJURP, SPC25, RANGAP1, AURKA, BUB1, BUB1B, PIF1, NUF2, CCNB1, KNSTRN, AURKB, CDK1, NCAPD2	421	264	52729	9.9698e-28	5.41958e-24	6.77448e-26
biological_process	GO:0007165	signal transduction	132	PLA2G4B, ARL17B, PTPRU, ARPC5, TOB1, CDKN1A, LOC102724428, NDC80, CEBPB, CENPA, CENPE, CENPF, KIF2C, OSBPL8, PLK3, MIB2, SGOL2, DGKA, GADD45A, DDIT3, DPYSL2, E2F1, E2F2, ECT2, VWCE, CORO1C, PHLDA3, PLXNB2, FYB, ASPM, ZNF385A, NUPR1, CYFIP2, NSG1, SESN1, GCLM, BLOC1S2, GPX1, GRIN2C, RACGAP1, GPSM2, CDIP1, HMGB2, BIRC5, IGFBP3, FAS, IL6, IL11, INCENP, INHBB, INPP1, ITPK1, CD82, KPNA2, MAD2L1, SMAD7…	324	5519	47474	3.31684e-27	1.80303e-23	2.22597e-25
molecular_function	GO:0003824	catalytic activity	132	PLA2G4B, ABHD14A-ACY1, UBE2F-SCLY, PTPRU, KIF20A, CDKN1A, LOC102724428, CDKN3, DPYSL4, ST6GALNAC2, TRIM3, CENPE, KIF2C, UBE2C, PRSS23, ATE1, ADAMTS7, CYGB, PLK3, RNF19B, CMBL, COX15, MIB2, KIF18B, MANEAL, DGKA, DDB2, DPYSL2, DCP1B, HACD2, AK1, ALDH3A1, ACSL4, FDXR, ISCU, KIF4A, RNF19A, GAMT, FBXO22, GCLM, UBE2S, APOBEC3C, BLOC1S2, ANG, GPX1, C1GALT1C1, UHRF1, BIRC5, ACER2, INPP1, ITPK1, KIF11, KI…	324	5545	47448	5.11748e-27	2.78186e-23	3.39252e-25
cellular_component	GO:0000775	chromosome, centromeric region	30	NDC80, CEBPB, CENPA, SPAG5, CENPE, CENPF, KIF2C, SGOL2, BIRC5, INCENP, KIF22, MAD2L1, MKI67, NEK2, PLK1, ERCC6L, SPDL1, CDCA8, MIS18BP1, HJURP, SPC25, RANGAP1, AURKA, BUB1, BUB1B, NUF2, CCNB1, KNSTRN, AURKB, NCAPD2	426	171	52822	7.26351e-27	3.94844e-23	4.75716e-25
biological_process	GO:0044770	cell cycle phase transition	42	CDKN1A, CDKN2C, CDKN3, CENPE, CENPF, DBF4, UBE2C, PLK3, GADD45A, E2F1, FBXO5, UBE2S, BIRC5, MAD2L1, MCM6, MDM2, NEK2, PCNA, TRIAP1, PLK1, ANLN, MCM10, BCAT1, AURKA, BUB1, BUB1B, TTK, TUBA4A, WEE1, XPC, BORA, FAM83D, PPM1D, CCNA2, CCNB1, TICRR, CCNB2, CDK1, CDC20, KIF14, CDC25A, CDC25C	414	483	52510	1.01063e-26	5.49378e-23	6.54021e-25
cellular_component	GO:0005694	chromosome	51	NDC80, CEBPB, CENPA, SPAG5, CENPE, CENPF, KIF2C, PLK3, SGOL2, CDCA2, E2F1, NCAPH, KIF4A, ZNF385A, UHRF1, H2AFX, HMGB2, BIRC5, INCENP, KIF22, MAD2L1, MCM6, MKI67, NEK2, PCNA, NUSAP1, PLK1, ERCC6L, SPDL1, CDCA8, MIS18BP1, HJURP, MCM10, SPC25, POLD4, RANGAP1, NCAPG, AURKA, BUB1, BUB1B, TOP2A, SUMO1, PIF1, ANP32E, HIST1H2AC, NUF2, CCNB1, KNSTRN, AURKB, CDK1, NCAPD2	405	801	52192	1.15672e-26	6.28792e-23	7.39756e-25
biological_process	GO:0023052	signaling	137	PLA2G4B, ARL17B, PTPRU, ARPC5, TOB1, CDKN1A, LOC102724428, NDC80, CEBPB, CENPA, CENPE, CENPF, KIF2C, OSBPL8, PLK3, MIB2, SGOL2, DGKA, GADD45A, DDIT3, DPYSL2, E2F1, E2F2, ECT2, VWCE, CORO1C, PHLDA3, PLXNB2, FYB, ASPM, ZNF385A, NUPR1, CYFIP2, NSG1, SESN1, GCLM, BLOC1S2, GPX1, GRIN2C, RACGAP1, GPSM2, CDIP1, HMGB2, BIRC5, IGFBP3, FAS, IL6, IL11, INCENP, INHBB, INPP1, ITPK1, CD82, KPNA2, MAD2L1, SMAD7…	319	5995	46998	1.7129e-26	9.31133e-23	1.07519e-24
biological_process	GO:0044772	mitotic cell cycle phase transition	41	CDKN1A, CDKN2C, CDKN3, CENPE, CENPF, DBF4, UBE2C, PLK3, GADD45A, E2F1, FBXO5, UBE2S, BIRC5, MAD2L1, MCM6, MDM2, NEK2, PCNA, TRIAP1, PLK1, ANLN, MCM10, BCAT1, AURKA, BUB1, BUB1B, TTK, TUBA4A, WEE1, XPC, BORA, PPM1D, CCNA2, CCNB1, TICRR, CCNB2, CDK1, CDC20, KIF14, CDC25A, CDC25C	415	459	52534	1.72078e-26	9.35417e-23	1.07519e-24
biological_process	GO:0008283	cell proliferation	74	PTPRU, TOB1, CDKN1A, CDKN2C, CDKN3, TACC3, CEBPB, MXD4, KIF2C, CRIP2, E2F1, ALDH3A1, VWCE, TPX2, ICOSLG, PLXNB2, ASPM, NUPR1, SESN1, BLOC1S2, ANG, GPX1, RACGAP1, UHRF1, SERTAD1, HMGB2, HOXA3, BIRC5, ACER2, IGFBP3, IL6, IL11, MDM2, KITLG, MKI67, ACHE, ASPH, PCNA, SERPINF1, PGF, PLK1, PLXNB3, PMAIP1, LGR4, MEG3, MCM10, KIF15, BCAT1, STIL, BUB1, BUB1B, TTK, BTG2, E2F8, SHCBP1, FAM83D, HIST1H2AC, BTB…	382	1878	51115	2.17152e-26	1.18044e-22	1.34141e-24
biological_process	GO:0010564	regulation of cell cycle process	43	CDKN1A, SPAG5, CENPE, CENPF, UBE2C, PLK3, E2F1, ECT2, TPX2, FBXO5, RACGAP1, BIRC5, KIF11, MAD2L1, MDM2, NEK2, NUSAP1, TRIAP1, PLK1, ANLN, STIL, AURKA, BUB1, BUB1B, TTK, XPC, E2F8, BORA, FAM83D, PSRC1, CCNA2, CCNB1, CCNF, TICRR, KNSTRN, AURKB, PTTG1, KIF23, ESPL1, CDK1, CDC20, KIF14, CDC25C	413	532	52461	3.3337e-26	1.8122e-22	2.03618e-24
biological_process	GO:0044700	single organism signaling	136	PLA2G4B, ARL17B, PTPRU, ARPC5, TOB1, CDKN1A, LOC102724428, NDC80, CEBPB, CENPA, CENPE, CENPF, KIF2C, OSBPL8, PLK3, MIB2, SGOL2, DGKA, GADD45A, DDIT3, DPYSL2, E2F1, E2F2, ECT2, VWCE, CORO1C, PHLDA3, PLXNB2, FYB, ASPM, ZNF385A, NUPR1, CYFIP2, NSG1, SESN1, GCLM, BLOC1S2, GPX1, GRIN2C, RACGAP1, GPSM2, CDIP1, HMGB2, BIRC5, IGFBP3, FAS, IL6, IL11, INCENP, INHBB, INPP1, ITPK1, CD82, KPNA2, MAD2L1, SMAD7…	320	5990	47003	5.22048e-26	2.83785e-22	3.15317e-24
biological_process	GO:0010604	positive regulation of macromolecule metabolic process	89	TOB1, CDKN1A, CEBPB, CENPE, UBE2C, OSBPL8, PLK3, RNF19B, KLF6, ZFP90, CDCA2, GADD45A, DDIT3, E2F1, ECT2, ELF2, TPX2, RNF19A, PHF19, FBXO22, FBXO5, NUPR1, CYFIP2, NSG1, UBE2S, BLOC1S2, ANG, GRIN2C, UHRF1, SERTAD1, HMGB2, HOXC13, ACER2, IGFBP3, FAS, IL6, IL11, INHBB, SMAD7, MDM2, MEF2D, KITLG, ASPH, ATF3, NEFL, NFIC, NRF1, PCNA, TRIAP1, PLK1, PMAIP1, LGR4, MEG3, PRKAB1, CYP26B1, DIABLO, RGMA, TIGAR…	367	2770	50223	6.71551e-26	3.65055e-22	4.0116e-24
biological_process	GO:0050790	regulation of catalytic activity	80	TBC1D3G, CDKN1A, CDKN2C, CDKN3, CENPE, DBF4, UBE2C, CYGB, OSBPL8, GADD45A, ECT2, DCP1B, TPX2, CORO1C, PLXNB2, FBXO5, CYFIP2, GCLM, UBE2S, ANG, GPX1, GRIN2C, RACGAP1, UHRF1, GPSM2, SERTAD1, HMGB2, BIRC5, ACER2, IGFBP3, FAS, IL6, MAD2L1, SMAD7, KITLG, ASPH, NEFL, PCNA, TRIAP1, SERPINF1, PLK1, PLXNB3, PMAIP1, PPP1R3C, PPP2R2C, DEPDC1, PRKAB1, DEPDC1B, DIABLO, TIGAR, GRHL3, RALGDS, RANGAP1, RAP2B, EP…	376	2277	50716	1.61353e-25	8.77114e-22	9.53384e-24
molecular_function	GO:0097159	organic cyclic compound binding	133	ARL17B, C7orf55-LUC7L2, KIF20A, LOC102724428, CEBPB, CENPA, MXD4, CENPE, DBF4, KIF2C, UBE2C, CYGB, OSBPL8, MRPL10, PLK3, KLF6, HNRNPA1L2, ZFP90, KIF18B, DGKA, DDB2, GADD45A, DDIT3, E2F1, E2F2, DCP1B, ELF2, AK1, ACSL4, FDXR, HSPA4L, TPX2, KIF4A, FAM133B, LSM4, ZNF385A, ZNF337, NUPR1, UBE2S, APOBEC3C, ANG, UHRF1, GTF2A1, H2AFX, HMGB2, HOXA3, HOXC13, ITPK1, KIF11, KIFC1, KIF22, KPNA2, SMAD7, MCM6, M…	323	5870	47123	2.82089e-25	1.53344e-21	1.64886e-23
cellular_component	GO:0044427	chromosomal part	47	NDC80, CEBPB, CENPA, SPAG5, CENPE, CENPF, KIF2C, PLK3, SGOL2, E2F1, NCAPH, ZNF385A, UHRF1, H2AFX, HMGB2, BIRC5, INCENP, KIF22, MAD2L1, MCM6, MKI67, NEK2, PCNA, PLK1, ERCC6L, SPDL1, CDCA8, MIS18BP1, HJURP, MCM10, SPC25, POLD4, RANGAP1, NCAPG, AURKA, BUB1, BUB1B, SUMO1, PIF1, ANP32E, HIST1H2AC, NUF2, CCNB1, KNSTRN, AURKB, CDK1, NCAPD2	409	710	52283	3.17581e-25	1.72637e-21	1.83656e-23
biological_process	GO:0033554	cellular response to stress	72	PLA2G4B, CDKN1A, CEBPB, ADAMTS7, PLK3, KLF6, SPATA18, RTN4RL1, DDB2, GADD45A, DDIT3, E2F1, ECT2, STOM, PHLDA3, LSM4, ZNF385A, FBXO22, NUPR1, SESN1, GPX1, UHRF1, CDIP1, H2AFX, HMGB2, FAS, IL6, INHBB, KIF22, MDM2, MKI67, ATF3, NEFL, RRM2B, PCNA, TRIAP1, PLK1, PMAIP1, POLH, NEIL3, MCM10, PRKAB1, DIABLO, TIGAR, POLD4, EDA2R, SDF2, CREB3L2, TCEA1, TOP2A, UBE2G2, SUMO1, UCP2, UNG, XPC, BTG2, CHAC1, DER…	384	1869	51124	4.16782e-25	2.26563e-21	2.38487e-23
biological_process	GO:0007010	cytoskeleton organization	55	ARPC4-TTLL3, ARPC5, KIF20A, NDC80, TACC3, CENPA, SPAG5, CENPE, CFL2, KIF2C, PLK3, KIF18B, GADD45A, DPYSL2, ECT2, TPX2, CORO1C, KIF4A, RNF19A, ASPM, FBXO5, ANG, GAS2L3, RACGAP1, GPSM2, BIRC5, ARPIN, KIF11, KIFC1, NEFL, NEK2, NUSAP1, PLK1, ANLN, SPDL1, SPC25, SHTN1, GRHL3, STIL, AURKA, TTK, WEE1, BORA, KIF18A, PSRC1, CCNB1, CCNF, KNSTRN, PRC1, AURKB, KIF23, MICAL2, ESPL1, CDK1, KIF14	401	1050	51943	6.23565e-25	3.3897e-21	3.53093e-23
biological_process	GO:0006807	nitrogen compound metabolic process	141	PLA2G4B, ABHD14A-ACY1, C7orf55-LUC7L2, TOB1, CDKN1A, CEBPB, MXD4, ST6GALNAC2, CENPF, DBF4, PNRC1, CYGB, MRPL10, PLK3, KLF6, COX15, HNRNPA1L2, ZFP90, DDB2, GADD45A, DDIT3, DPYSL2, E2F1, E2F2, DCP1B, ELF2, HACD2, AK1, FDXR, MRPS27, ISCU, LSM4, GAMT, ZNF385A, PHF19, ZNF337, FBXO5, NUPR1, SESN1, GCLM, APOBEC3C, SLCO4A1, BLOC1S2, ANG, GPX1, UHRF1, GTF2A1, SERTAD1, H2AFX, HMGB2, HMMR, HOXA3, HOXC13, BI…	315	6539	46454	8.02549e-25	4.36266e-21	4.48358e-23
biological_process	GO:0051179	localization	127	C15orf38-AP3S2, PTPRU, ARPC5, KIF20A, TOB1, CDKN1A, NDC80, TACC3, CENPA, TRIM3, SPAG5, TGOLN2, CENPE, CENPF, KIF2C, CYGB, OSBPL8, PLK3, RNF19B, COX15, HNRNPA1L2, DDIT3, DPYSL2, E2F1, ECT2, STOM, ACSL4, ARL6IP1, ASTN2, CORO1C, PLXNB2, FLRT2, KIF4A, FYB, ASPM, ZNF385A, FBXO22, CYFIP2, NSG1, SLCO4A1, BLOC1S2, ANG, GPX1, GRIN2C, RACGAP1, GPSM2, HMGB2, BIRC5, ARPIN, IGFBP3, IL6, IL11, INHBB, KIFC1, KI…	329	5484	47509	8.08298e-25	4.39391e-21	4.48358e-23
molecular_function	GO:1901363	heterocyclic compound binding	131	ARL17B, C7orf55-LUC7L2, KIF20A, LOC102724428, CEBPB, CENPA, MXD4, CENPE, DBF4, KIF2C, UBE2C, CYGB, MRPL10, PLK3, KLF6, HNRNPA1L2, ZFP90, KIF18B, DGKA, DDB2, GADD45A, DDIT3, E2F1, E2F2, DCP1B, ELF2, AK1, ACSL4, FDXR, HSPA4L, TPX2, KIF4A, FAM133B, LSM4, ZNF385A, ZNF337, NUPR1, UBE2S, APOBEC3C, ANG, UHRF1, GTF2A1, H2AFX, HMGB2, HOXA3, HOXC13, ITPK1, KIF11, KIFC1, KIF22, KPNA2, SMAD7, MCM6, MEF2D, MK…	325	5793	47200	9.02247e-25	4.90461e-21	4.95415e-23
biological_process	GO:0032268	regulation of cellular protein metabolic process	80	TOB1, CDKN1A, CDKN2C, CDKN3, CENPE, UBE2C, OSBPL8, PLK3, RNF19B, CDCA2, GADD45A, ECT2, TPX2, CORO1C, PLXNB2, RNF19A, ZNF385A, PHF19, FBXO22, FBXO5, NUPR1, CYFIP2, UBE2S, ANG, GPX1, GRIN2C, UHRF1, SERTAD1, BIRC5, ACER2, IGFBP3, FAS, IL6, IL11, INHBB, MAD2L1, SMAD7, MDM2, KITLG, ASPH, ATF3, NEFL, TRIAP1, SERPINF1, PLK1, PMAIP1, PPP2R2C, PRKAB1, DIABLO, RAP2B, EDA2R, STIL, AURKA, BUB1, BUB1B, TTK, E…	376	2377	50616	2.19697e-24	1.19427e-20	1.19427e-22
biological_process	GO:0043412	macromolecule modification	102	ARPC4-TTLL3, UBE2F-SCLY, PTPRU, CDKN1A, LOC102724428, CDKN2C, CDKN3, ST6GALNAC2, TRIM3, CENPE, UBE2C, ATE1, ADAMTS7, OSBPL8, PLK3, RNF19B, MIB2, CDCA2, DDB2, GADD45A, ECT2, TPX2, CORO1C, PLXNB2, FYB, RNF19A, PHF19, FBXO22, FBXO5, NUPR1, UBE2S, APOBEC3C, ANG, GPX1, GRIN2C, C1GALT1C1, UHRF1, SERTAD1, BIRC5, ACER2, IGFBP3, IL6, IL11, INHBB, MAD2L1, SMAD7, MDM2, KITLG, ASPH, ATF3, NEFL, NEK2, ZDHHC9,…	354	3792	49201	3.92873e-24	2.13566e-20	2.11451e-22
biological_process	GO:0031325	positive regulation of cellular metabolic process	87	TOB1, CDKN1A, CEBPB, CENPE, UBE2C, OSBPL8, PLK3, RNF19B, KLF6, ZFP90, CDCA2, GADD45A, DDIT3, E2F1, ECT2, ELF2, TPX2, RNF19A, PHF19, FBXO22, FBXO5, NUPR1, CYFIP2, NSG1, UBE2S, BLOC1S2, ANG, GRIN2C, UHRF1, SERTAD1, HMGB2, HOXC13, ACER2, IGFBP3, FAS, IL6, IL11, INHBB, SMAD7, MDM2, MEF2D, KITLG, ASPH, ATF3, NEFL, NFIC, NRF1, PCNA, TRIAP1, PLK1, PMAIP1, LGR4, MEG3, DIABLO, RGMA, TIGAR, GRHL3, RAP2B, E…	369	2830	50163	4.76808e-24	2.59193e-20	2.54111e-22
biological_process	GO:0051302	regulation of cell division	33	CDKN1A, CENPE, UBE2C, PLK3, KIF18B, ECT2, ASPM, FBXO5, RACGAP1, BIRC5, KIF11, MAD2L1, NEK2, NUSAP1, PGF, PLK1, ANLN, STIL, AURKA, BUB1, BUB1B, TTK, E2F8, BORA, PSRC1, CCNB1, AURKB, PTTG1, KIF23, ESPL1, CDC20, KIF14, CDC25C	423	296	52697	4.99195e-24	2.71362e-20	2.63458e-22
cellular_component	GO:0000776	kinetochore	25	NDC80, CENPA, SPAG5, CENPE, CENPF, KIF2C, SGOL2, BIRC5, INCENP, KIF22, MAD2L1, NEK2, PLK1, ERCC6L, SPDL1, MIS18BP1, HJURP, SPC25, RANGAP1, BUB1, BUB1B, NUF2, CCNB1, KNSTRN, AURKB	431	121	52872	7.11483e-24	3.86762e-20	3.70674e-22
biological_process	GO:0051246	regulation of protein metabolic process	82	TOB1, CDKN1A, CDKN2C, CDKN3, CEBPB, CENPE, UBE2C, OSBPL8, PLK3, RNF19B, CDCA2, GADD45A, ECT2, TPX2, CORO1C, PLXNB2, RNF19A, ZNF385A, PHF19, FBXO22, FBXO5, NUPR1, CYFIP2, UBE2S, ANG, GPX1, GRIN2C, UHRF1, SERTAD1, BIRC5, ACER2, IGFBP3, FAS, IL6, IL11, INHBB, MAD2L1, SMAD7, MDM2, KITLG, ASPH, ATF3, NEFL, TRIAP1, SERPINF1, PLK1, PMAIP1, PPP2R2C, PRKAB1, DIABLO, RAP2B, EDA2R, STIL, AURKA, BUB1, BUB1B,…	374	2543	50450	7.15982e-24	3.89208e-20	3.70674e-22
biological_process	GO:0006464	cellular protein modification process	99	ARPC4-TTLL3, UBE2F-SCLY, PTPRU, CDKN1A, LOC102724428, CDKN2C, CDKN3, ST6GALNAC2, TRIM3, CENPE, UBE2C, ATE1, ADAMTS7, OSBPL8, PLK3, RNF19B, MIB2, CDCA2, DDB2, GADD45A, ECT2, TPX2, CORO1C, PLXNB2, FYB, RNF19A, PHF19, FBXO22, FBXO5, NUPR1, UBE2S, ANG, GPX1, GRIN2C, C1GALT1C1, UHRF1, SERTAD1, BIRC5, ACER2, IGFBP3, IL6, IL11, INHBB, MAD2L1, SMAD7, MDM2, KITLG, ASPH, ATF3, NEFL, NEK2, ZDHHC9, PLK1, PPP…	357	3642	49351	1.06858e-23	5.8088e-20	5.42879e-22
biological_process	GO:0036211	protein modification process	99	ARPC4-TTLL3, UBE2F-SCLY, PTPRU, CDKN1A, LOC102724428, CDKN2C, CDKN3, ST6GALNAC2, TRIM3, CENPE, UBE2C, ATE1, ADAMTS7, OSBPL8, PLK3, RNF19B, MIB2, CDCA2, DDB2, GADD45A, ECT2, TPX2, CORO1C, PLXNB2, FYB, RNF19A, PHF19, FBXO22, FBXO5, NUPR1, UBE2S, ANG, GPX1, GRIN2C, C1GALT1C1, UHRF1, SERTAD1, BIRC5, ACER2, IGFBP3, IL6, IL11, INHBB, MAD2L1, SMAD7, MDM2, KITLG, ASPH, ATF3, NEFL, NEK2, ZDHHC9, PLK1, PPP…	357	3642	49351	1.06858e-23	5.8088e-20	5.42879e-22
cellular_component	GO:0000777	condensed chromosome kinetochore	23	NDC80, CENPA, SPAG5, CENPE, CENPF, KIF2C, SGOL2, BIRC5, INCENP, MAD2L1, NEK2, PLK1, ERCC6L, SPDL1, MIS18BP1, HJURP, SPC25, RANGAP1, BUB1, BUB1B, NUF2, CCNB1, KNSTRN	433	94	52899	2.31896e-23	1.26059e-19	1.16721e-21
biological_process	GO:0007051	spindle organization	25	NDC80, TACC3, SPAG5, TPX2, KIF4A, ASPM, FBXO5, RACGAP1, BIRC5, KIF11, KIFC1, NEK2, PLK1, SPC25, STIL, AURKA, TTK, BORA, PSRC1, CCNB1, KNSTRN, PRC1, AURKB, KIF23, ESPL1	431	133	52860	5.14051e-23	2.79438e-19	2.56365e-21
biological_process	GO:1901360	organic cyclic compound metabolic process	127	C7orf55-LUC7L2, TOB1, CDKN1A, CEBPB, MXD4, CENPF, DBF4, PNRC1, PLK3, KLF6, COX15, HNRNPA1L2, ZFP90, DDB2, GADD45A, DDIT3, DPYSL2, E2F1, E2F2, DCP1B, ELF2, AK1, FDXR, LSM4, GAMT, ZNF385A, PHF19, ZNF337, FBXO5, NUPR1, SESN1, APOBEC3C, SLCO4A1, BLOC1S2, ANG, GPX1, UHRF1, GTF2A1, SERTAD1, H2AFX, HMGB2, HOXA3, HOXC13, BIRC5, IL6, IL11, KIF22, KPNA2, SMAD7, MCM6, MDM2, MEF2D, KITLG, MKI67, ACHE, ASPH, …	329	5829	47164	1.56513e-22	8.50803e-19	7.73457e-21
biological_process	GO:0034641	cellular nitrogen compound metabolic process	132	PLA2G4B, C7orf55-LUC7L2, TOB1, CDKN1A, CEBPB, MXD4, ST6GALNAC2, CENPF, DBF4, PNRC1, MRPL10, PLK3, KLF6, COX15, HNRNPA1L2, ZFP90, DDB2, GADD45A, DDIT3, DPYSL2, E2F1, E2F2, DCP1B, ELF2, AK1, FDXR, MRPS27, LSM4, GAMT, ZNF385A, PHF19, ZNF337, FBXO5, NUPR1, SESN1, GCLM, APOBEC3C, BLOC1S2, ANG, GPX1, UHRF1, GTF2A1, SERTAD1, H2AFX, HMGB2, HOXA3, HOXC13, BIRC5, ACER2, IL6, IL11, KIF22, KPNA2, SMAD7, MCM6…	324	6227	46766	1.74355e-22	9.47794e-19	8.53868e-21
biological_process	GO:0051641	cellular localization	85	C15orf38-AP3S2, PTPRU, TOB1, CDKN1A, NDC80, TACC3, CENPA, SPAG5, TGOLN2, CENPE, CENPF, KIF2C, OSBPL8, PLK3, RNF19B, DDIT3, DPYSL2, E2F1, ECT2, STOM, ARL6IP1, ASTN2, KIF4A, FYB, ASPM, ZNF385A, FBXO22, NSG1, BLOC1S2, ANG, RACGAP1, GPSM2, BIRC5, IL6, IL11, INHBB, KIFC1, KIF22, KPNA2, SMAD7, MDM2, ACHE, ASPH, NEFL, NEK2, ZDHHC9, NUSAP1, PLK1, PMAIP1, SEPT5, VPS13C, SPDL1, CDCA8, CEP55, LGR4, MEG3, SP…	371	2882	50111	2.38302e-22	1.29541e-18	1.15662e-20
biological_process	GO:0043933	macromolecular complex subunit organization	77	ARPC4-TTLL3, ARPC5, C7orf55-LUC7L2, NDC80, TACC3, CENPA, SPAG5, CFL2, KIF2C, UBE2C, MRPL10, PLK3, COX15, KIF18B, DDB2, ECT2, STOM, TPX2, MRPS27, KIF4A, LSM4, ASPM, PHF19, FBXO5, NUPR1, NSG1, UBE2S, ANG, RACGAP1, UHRF1, H2AFX, HMGB2, BIRC5, ARPIN, FAS, KIF11, KIFC1, MDM2, ACHE, ASPH, NEFL, NEK2, PLK1, PMAIP1, ANLN, MIS18BP1, HJURP, PRKAB1, GOPC, SPC25, SHTN1, STIL, SMN1, AURKA, VAMP2, TTK, TUBA4A,…	379	2404	50589	3.34733e-22	1.81961e-18	1.61027e-20
biological_process	GO:0071822	protein complex subunit organization	64	ARPC4-TTLL3, ARPC5, NDC80, TACC3, CENPA, SPAG5, CFL2, KIF2C, UBE2C, MRPL10, PLK3, COX15, KIF18B, ECT2, STOM, TPX2, MRPS27, KIF4A, ASPM, FBXO5, NUPR1, NSG1, UBE2S, ANG, RACGAP1, BIRC5, ARPIN, FAS, KIF11, KIFC1, MDM2, ACHE, ASPH, NEFL, NEK2, PLK1, PMAIP1, ANLN, MIS18BP1, HJURP, PRKAB1, GOPC, SPC25, SHTN1, STIL, AURKA, VAMP2, TTK, TUBA4A, SUMO1, DERL1, BORA, ANP32E, KIF18A, PSRC1, CCNB1, KNSTRN, PRC…	392	1667	51326	3.41408e-22	1.85589e-18	1.62798e-20
biological_process	GO:0006139	nucleobase-containing compound metabolic process	121	C7orf55-LUC7L2, TOB1, CDKN1A, CEBPB, MXD4, CENPF, DBF4, PNRC1, PLK3, KLF6, COX15, HNRNPA1L2, ZFP90, DDB2, GADD45A, DDIT3, DPYSL2, E2F1, E2F2, DCP1B, ELF2, AK1, FDXR, LSM4, GAMT, ZNF385A, PHF19, ZNF337, FBXO5, NUPR1, SESN1, APOBEC3C, BLOC1S2, ANG, GPX1, UHRF1, GTF2A1, SERTAD1, H2AFX, HMGB2, HOXA3, HOXC13, BIRC5, IL6, IL11, KIF22, KPNA2, SMAD7, MCM6, MDM2, MEF2D, KITLG, MKI67, ACHE, ASPH, ATF3, NFI…	335	5431	47562	5.55335e-22	3.0188e-18	2.62504e-20
biological_process	GO:0008219	cell death	68	CDKN1A, CEBPB, DPYSL4, PLK3, GADD45A, DDIT3, E2F1, E2F2, ECT2, TPX2, PHLDA3, ZNF385A, NUPR1, CYFIP2, GCLM, BLOC1S2, GPX1, CDIP1, HMGB2, BIRC5, ACER2, IGFBP3, FAS, IL6, IL11, INHBB, LMNB1, MAD2L1, MDM2, MEF2D, KITLG, ATF3, NEFL, RRM2B, TRIAP1, SERPINF1, PLK1, PMAIP1, ATAD3A, G2E3, CYP26B1, DIABLO, TIGAR, EDA2R, STIL, AURKA, BUB1, BUB1B, TOP2A, UCP2, BTG2, CHAC1, TXNDC5, BTBD10, TNFSF9, TNFRSF10D, …	388	1909	51084	6.61501e-22	3.59592e-18	3.07344e-20
biological_process	GO:0016265	death	68	CDKN1A, CEBPB, DPYSL4, PLK3, GADD45A, DDIT3, E2F1, E2F2, ECT2, TPX2, PHLDA3, ZNF385A, NUPR1, CYFIP2, GCLM, BLOC1S2, GPX1, CDIP1, HMGB2, BIRC5, ACER2, IGFBP3, FAS, IL6, IL11, INHBB, LMNB1, MAD2L1, MDM2, MEF2D, KITLG, ATF3, NEFL, RRM2B, TRIAP1, SERPINF1, PLK1, PMAIP1, ATAD3A, G2E3, CYP26B1, DIABLO, TIGAR, EDA2R, STIL, AURKA, BUB1, BUB1B, TOP2A, UCP2, BTG2, CHAC1, TXNDC5, BTBD10, TNFSF9, TNFRSF10D, …	388	1909	51084	6.61501e-22	3.59592e-18	3.07344e-20
biological_process	GO:0006725	cellular aromatic compound metabolic process	123	C7orf55-LUC7L2, TOB1, CDKN1A, CEBPB, MXD4, CENPF, DBF4, PNRC1, PLK3, KLF6, COX15, HNRNPA1L2, ZFP90, DDB2, GADD45A, DDIT3, DPYSL2, E2F1, E2F2, DCP1B, ELF2, AK1, FDXR, LSM4, GAMT, ZNF385A, PHF19, ZNF337, FBXO5, NUPR1, SESN1, APOBEC3C, SLCO4A1, BLOC1S2, ANG, GPX1, UHRF1, GTF2A1, SERTAD1, H2AFX, HMGB2, HOXA3, HOXC13, BIRC5, IL6, IL11, KIF22, KPNA2, SMAD7, MCM6, MDM2, MEF2D, KITLG, MKI67, ACHE, ASPH, …	333	5622	47371	6.98565e-22	3.7974e-18	3.21813e-20
biological_process	GO:0046483	heterocycle metabolic process	122	C7orf55-LUC7L2, TOB1, CDKN1A, CEBPB, MXD4, CENPF, DBF4, PNRC1, PLK3, KLF6, COX15, HNRNPA1L2, ZFP90, DDB2, GADD45A, DDIT3, DPYSL2, E2F1, E2F2, DCP1B, ELF2, AK1, FDXR, LSM4, GAMT, ZNF385A, PHF19, ZNF337, FBXO5, NUPR1, SESN1, APOBEC3C, BLOC1S2, ANG, GPX1, UHRF1, GTF2A1, SERTAD1, H2AFX, HMGB2, HOXA3, HOXC13, BIRC5, IL6, IL11, KIF22, KPNA2, SMAD7, MCM6, MDM2, MEF2D, KITLG, MKI67, ACHE, ASPH, ATF3, NFI…	334	5604	47389	1.61283e-21	8.76732e-18	7.36749e-20
molecular_function	GO:0019899	enzyme binding	62	UBE2F-SCLY, KIF20A, TOB1, CDKN1A, CDKN2C, CEBPB, UBE2C, RNF19B, DPYSL2, E2F1, ECT2, HACD2, STOM, TPX2, CORO1C, RNF19A, FBXO5, GCLM, UBE2S, RACGAP1, H2AFX, BIRC5, FAS, KIF11, KPNA2, LMNB1, SMAD7, MDM2, MEF2D, NEFL, NEK2, PCNA, ZBTB7A, PLK1, SPDL1, PPP1R3C, PRKAB1, ANKRA2, PEX19, RABGGTA, ACTA2, RANGAP1, PHLDB3, AURKA, TOP2A, UBE2G2, SUMO1, DERL1, BORA, FAM83D, PPM1D, NKD2, CCNA2, CCNB1, PRC1, NEK9…	394	1625	51368	2.30959e-21	1.25549e-17	1.04624e-19
biological_process	GO:0051276	chromosome organization	49	NDC80, CENPA, SPAG5, CENPE, KIF2C, UBE2C, KIF18B, DDB2, NCAPH, PHF19, FBXO5, UHRF1, H2AFX, HMGB2, KIFC1, KIF22, MAD2L1, MCM6, NEK2, PCNA, NUSAP1, PLK1, SPDL1, CDCA8, CEP55, MIS18BP1, HJURP, POLD4, NCAPG, AURKA, BUB1, BUB1B, TOP2A, TTK, XPC, TBL1XR1, PIF1, ANP32E, KIF18A, HIST1H2AC, PSRC1, CCNB1, KNSTRN, AURKB, PTTG1, ESPL1, CDC20, NCAPD2, KIF14	407	983	52010	2.36426e-21	1.28521e-17	1.06216e-19
biological_process	GO:0032501	multicellular organismal process	137	PTPRU, ARPC5, TOB1, CDKN1A, CDKN2C, TACC3, CEBPB, DPYSL4, TRIM3, CENPE, CENPF, KIF2C, ADAMTS7, CYGB, RNF19B, COX15, CRIP2, RTN4RL1, DGKA, DDIT3, DPYSL2, E2F1, ECT2, ACSL4, CORO1C, PLXNB2, FLRT2, KIF4A, ASPM, GAMT, ZNF385A, PHF19, FBXO22, FBXO5, NUPR1, GCLM, BLOC1S2, ANG, GPX1, GRIN2C, C1GALT1C1, RACGAP1, GPSM2, H2AFX, HMGB2, HOXA3, HOXC13, IGFBP3, FAS, IL6, INHBB, ITPK1, KIF11, KIFC1, KIF22, SMAD…	319	6848	46145	5.43124e-21	2.95242e-17	2.40877e-19
biological_process	GO:0044707	single-multicellular organism process	134	PTPRU, ARPC5, TOB1, CDKN1A, CDKN2C, TACC3, CEBPB, DPYSL4, TRIM3, CENPE, CENPF, KIF2C, ADAMTS7, CYGB, RNF19B, COX15, CRIP2, RTN4RL1, DGKA, DDIT3, DPYSL2, E2F1, ECT2, ACSL4, CORO1C, PLXNB2, FLRT2, KIF4A, ASPM, GAMT, ZNF385A, PHF19, FBXO22, NUPR1, GCLM, BLOC1S2, ANG, GPX1, GRIN2C, C1GALT1C1, RACGAP1, GPSM2, H2AFX, HMGB2, HOXA3, HOXC13, IGFBP3, FAS, IL6, INHBB, ITPK1, KIF11, KIFC1, KIF22, SMAD7, MEF2…	322	6624	46369	5.45032e-21	2.96279e-17	2.40877e-19
biological_process	GO:0032502	developmental process	121	PTPRU, ARPC5, TOB1, CDKN1A, CDKN2C, TACC3, CEBPB, DPYSL4, TRIM3, CENPE, CENPF, CFL2, ADAMTS7, OSBPL8, CRIP2, RTN4RL1, DDIT3, DPYSL2, E2F1, ECT2, ELF2, ALDH3A1, ACSL4, CORO1C, PHLDA3, PLXNB2, FLRT2, KIF4A, ASPM, GAMT, ZNF385A, PHF19, FBXO22, FBXO5, NUPR1, BLOC1S2, ANG, GPX1, GRIN2C, C1GALT1C1, RACGAP1, GPSM2, H2AFX, HMGB2, HOXA3, HOXC13, ARPIN, IGFBP3, FAS, IL6, INHBB, SMAD7, MEF2D, ARVCF, KITLG, …	335	5658	47335	1.13678e-20	6.17953e-17	4.98349e-19
biological_process	GO:0044710	single-organism metabolic process	116	PLA2G4B, ABHD14A-ACY1, ST6GALNAC2, CENPE, UBE2C, ADAMTS7, CYGB, MRPL10, SPATA18, COX15, DDB2, GADD45A, HACD2, AK1, STOM, ALDH3A1, ACSL4, FDXR, MRPS27, ISCU, LSM4, GAMT, PHF19, FBXO5, GCLM, APOBEC3C, ANG, GPX1, GRIN2C, C1GALT1C1, UHRF1, H2AFX, HMGB2, HMMR, ACER2, IGFBP3, IL6, IL11, INHBB, INPP1, ITPK1, KIF22, MAD2L1, KITLG, ACHE, ASPH, ATF3, NDUFA5, NEFL, RRM2B, AK3, RDH11, PCNA, PLK1, PMAIP1, POL…	340	5281	47712	1.23465e-20	6.71154e-17	5.36923e-19
biological_process	GO:0007264	small GTPase mediated signal transduction	46	ARL17B, ARPC5, CDKN1A, NDC80, CENPA, CENPE, CENPF, KIF2C, SGOL2, ECT2, CYFIP2, GRIN2C, RACGAP1, BIRC5, INCENP, MAD2L1, KITLG, NEFL, PLK1, ERCC6L, SPDL1, CDCA8, DEPDC1B, GOPC, SPC25, SHTN1, RALGDS, RANGAP1, RAP2B, RRAD, EPS8L2, BUB1, BUB1B, KIF18A, NUF2, ARHGEF39, CCNA2, ARHGAP11B, PRC1, AURKB, ARHGAP29, NTN1, ARHGAP11A, CDC20, KIF14, CDC25C	410	891	52102	1.29128e-20	7.0194e-17	5.57096e-19
cellular_component	GO:0005654	nucleoplasm	81	KIF20A, CDKN1A, CEBPB, CENPA, SPAG5, TGOLN2, CENPF, DBF4, UBE2C, MRPL10, KIF18B, SGOL2, CDCA2, DDB2, DDIT3, E2F1, E2F2, ELF2, ALDH3A1, TPX2, KIF4A, PHF19, FBXO5, RACGAP1, GTF2A1, H2AFX, HMGB2, HOXA3, KIF22, KPNA2, LMNB1, SMAD7, MCM6, MDM2, MEF2D, ARVCF, ATF3, NFIC, NRF1, RRM2B, PCNA, PLK1, POLH, ANLN, ERCC6L, MIS18BP1, HJURP, MCM10, MED29, ZCCHC8, DEPDC1, SFMBT2, POLD4, PEX19, SCP2, SMN1, TCEA1, …	375	2818	50175	1.32233e-20	7.1882e-17	5.66e-19
biological_process	GO:0051128	regulation of cellular component organization	68	ARPC4-TTLL3, ARPC5, CDKN1A, CDKN2C, SPAG5, CENPE, CFL2, UBE2C, DPYSL2, E2F1, ECT2, STOM, ACSL4, TPX2, CORO1C, PLXNB2, FLRT2, PHF19, FBXO5, GPX1, RACGAP1, SERTAD1, BIRC5, ARPIN, IGFBP3, FAS, IL6, KIF11, MAD2L1, SMAD7, ASPH, NEFL, NEK2, NUSAP1, TRIAP1, SERPINF1, PLK1, PLXNB3, PMAIP1, ANLN, HJURP, RGMA, TIGAR, SHTN1, GRHL3, RRAD, EPS8L2, AURKA, BUB1, BUB1B, TTK, SUMO1, BORA, PIF1, PSRC1, NKD2, NRP1,…	388	2037	50956	1.83708e-20	9.98637e-17	7.80185e-19
biological_process	GO:0012501	programmed cell death	64	CDKN1A, CEBPB, PLK3, GADD45A, DDIT3, E2F1, E2F2, ECT2, TPX2, PHLDA3, ZNF385A, NUPR1, CYFIP2, GCLM, BLOC1S2, GPX1, CDIP1, HMGB2, BIRC5, ACER2, IGFBP3, FAS, IL6, IL11, INHBB, LMNB1, MAD2L1, MDM2, MEF2D, KITLG, ATF3, NEFL, RRM2B, TRIAP1, PLK1, PMAIP1, ATAD3A, G2E3, CYP26B1, DIABLO, TIGAR, EDA2R, STIL, AURKA, BUB1, BUB1B, TOP2A, UCP2, BTG2, CHAC1, TXNDC5, TNFSF9, TNFRSF10D, TNFRSF10B, NRP1, AURKB, NT…	392	1809	51184	1.85935e-20	1.01075e-16	7.83523e-19
biological_process	GO:0090304	nucleic acid metabolic process	110	C7orf55-LUC7L2, TOB1, CDKN1A, CEBPB, MXD4, CENPF, DBF4, PNRC1, PLK3, KLF6, HNRNPA1L2, ZFP90, DDB2, GADD45A, DDIT3, E2F1, E2F2, DCP1B, ELF2, LSM4, ZNF385A, PHF19, ZNF337, FBXO5, NUPR1, SESN1, APOBEC3C, BLOC1S2, ANG, UHRF1, GTF2A1, SERTAD1, H2AFX, HMGB2, HOXA3, HOXC13, BIRC5, IL6, IL11, KIF22, KPNA2, SMAD7, MCM6, MDM2, MEF2D, KITLG, MKI67, ACHE, ASPH, ATF3, NFIC, NRF1, RRM2B, PCNA, ZBTB7A, TRIAP1, …	346	4876	48117	2.39797e-20	1.30354e-16	1.00272e-18
biological_process	GO:0006793	phosphorus metabolic process	83	PLA2G4B, PTPRU, CDKN1A, LOC102724428, CDKN2C, CDKN3, CENPE, OSBPL8, PLK3, COX15, CDCA2, DGKA, GADD45A, ECT2, HACD2, AK1, ACSL4, FDXR, TPX2, CORO1C, PLXNB2, FYB, ANG, GPX1, GRIN2C, SERTAD1, BIRC5, IGFBP3, IL6, IL11, INHBB, INPP1, ITPK1, SMAD7, KITLG, ACHE, ATF3, NEFL, NEK2, RRM2B, AK3, PLK1, PPP1R3C, NADSYN1, PPP2R2C, NUDT15, PRKAB1, ADCK3, TIGAR, RAP2B, EDA2R, SCP2, STIL, NME1-NME2, AURKA, BUB1, …	373	2987	50006	2.94148e-20	1.59899e-16	1.2206e-18
biological_process	GO:0044767	single-organism developmental process	119	PTPRU, ARPC5, TOB1, CDKN1A, CDKN2C, TACC3, CEBPB, DPYSL4, TRIM3, CENPE, CENPF, CFL2, ADAMTS7, OSBPL8, CRIP2, RTN4RL1, DDIT3, DPYSL2, E2F1, ECT2, ELF2, ALDH3A1, ACSL4, CORO1C, PLXNB2, FLRT2, KIF4A, ASPM, GAMT, ZNF385A, PHF19, FBXO22, FBXO5, NUPR1, BLOC1S2, ANG, GPX1, GRIN2C, C1GALT1C1, RACGAP1, GPSM2, H2AFX, HMGB2, HOXA3, HOXC13, ARPIN, IGFBP3, FAS, IL6, INHBB, SMAD7, MEF2D, ARVCF, KITLG, MKI67, A…	337	5573	47420	3.00613e-20	1.63413e-16	1.23798e-18
biological_process	GO:0006915	apoptotic process	63	CDKN1A, CEBPB, PLK3, GADD45A, DDIT3, E2F1, E2F2, ECT2, TPX2, PHLDA3, ZNF385A, NUPR1, CYFIP2, GCLM, BLOC1S2, GPX1, CDIP1, HMGB2, BIRC5, ACER2, IGFBP3, FAS, IL6, IL11, INHBB, LMNB1, MAD2L1, MDM2, MEF2D, KITLG, ATF3, NEFL, RRM2B, TRIAP1, PLK1, PMAIP1, ATAD3A, G2E3, DIABLO, TIGAR, EDA2R, STIL, AURKA, BUB1, BUB1B, TOP2A, UCP2, BTG2, CHAC1, TXNDC5, TNFSF9, TNFRSF10D, TNFRSF10B, NRP1, AURKB, NTN1, TP53I…	393	1791	51202	5.13478e-20	2.79127e-16	2.0987e-18
cellular_component	GO:0005874	microtubule	32	KIF20A, SPAG5, CENPE, KIF2C, KIF18B, DPYSL2, TPX2, KIF4A, ASPM, GAS2L3, RACGAP1, BIRC5, INCENP, KIF11, KIFC1, KIF22, NEK2, NUSAP1, GTSE1, PLK1, KIF15, AURKA, TUBA4A, TBL1XR1, KIF18A, PSRC1, KNSTRN, PRC1, AURKB, KIF23, CDK1, KIF14	424	384	52609	6.88336e-20	3.74179e-16	2.79238e-18
cellular_component	GO:0016020	membrane	157	PLA2G4B, C15orf38-AP3S2, TVP23C-CDRT4, PTPRU, TBC1D3G, NDC80, ST6GALNAC2, TGOLN2, CENPE, KIF2C, OSBPL8, LYPD1, PAQR4, MRPL10, RNF19B, KLHDC7A, SPATA18, COX15, RTN4RL1, KIF18B, MANEAL, FAM84B, DGKA, DPYSL2, ECT2, DCP1B, HACD2, AK1, STOM, ALDH3A1, ACSL4, FDXR, MRPS27, ARL6IP1, ASTN2, ICOSLG, NCAPH, CORO1C, PHLDA3, PLXNB2, KIF4A, FYB, RNF19A, CYFIP2, NSG1, SLCO4A1, GRIN2C, C1GALT1C1, RACGAP1, HMMR, …	299	8785	44208	7.18736e-20	3.90705e-16	2.89411e-18
biological_process	GO:0048856	anatomical structure development	111	PTPRU, ARPC5, CDKN1A, CDKN2C, TACC3, CEBPB, DPYSL4, TRIM3, CENPF, CFL2, ADAMTS7, CRIP2, RTN4RL1, DDIT3, DPYSL2, E2F1, ECT2, ACSL4, CORO1C, PHLDA3, PLXNB2, FLRT2, KIF4A, ASPM, GAMT, ZNF385A, FBXO22, FBXO5, NUPR1, BLOC1S2, ANG, GPX1, GRIN2C, C1GALT1C1, RACGAP1, GPSM2, H2AFX, HMGB2, HOXA3, HOXC13, ARPIN, IGFBP3, FAS, IL6, INHBB, SMAD7, MEF2D, KITLG, MKI67, ACHE, ASPH, ATF3, NEFL, NEK2, NFIC, NINJ1, …	345	5020	47973	7.56598e-20	4.11287e-16	3.02417e-18
biological_process	GO:0065008	regulation of biological quality	88	ARPC4-TTLL3, ARPC5, TACC3, CENPE, CFL2, KIF2C, OSBPL8, DGKA, DDIT3, DPYSL2, E2F1, STOM, FDXR, ISCU, PLXNB2, FLRT2, KIF4A, ASPM, ZNF385A, GCLM, SLCO4A1, BLOC1S2, GPX1, GRIN2C, C1GALT1C1, RACGAP1, HMGB2, BIRC5, ARPIN, FAS, IL6, IL11, INHBB, ITPK1, KIF11, KIFC1, KIF22, SMAD7, MDM2, KITLG, ACHE, ASPH, NEFL, AK3, RDH11, PCNA, TRIAP1, SERPINF1, PLK1, PMAIP1, SEPT5, VPS13C, RETSAT, LGR4, MEG3, SPATA7, C…	368	3373	49620	7.93406e-20	4.31295e-16	3.14814e-18
biological_process	GO:0006796	phosphate-containing compound metabolic process	81	PLA2G4B, PTPRU, CDKN1A, LOC102724428, CDKN2C, CDKN3, CENPE, OSBPL8, PLK3, COX15, CDCA2, DGKA, GADD45A, ECT2, AK1, FDXR, TPX2, CORO1C, PLXNB2, FYB, ANG, GPX1, GRIN2C, SERTAD1, BIRC5, IGFBP3, IL6, IL11, INHBB, INPP1, ITPK1, SMAD7, KITLG, ACHE, ATF3, NEFL, NEK2, RRM2B, AK3, PLK1, PPP1R3C, NADSYN1, PPP2R2C, NUDT15, PRKAB1, ADCK3, TIGAR, RAP2B, EDA2R, SCP2, STIL, NME1-NME2, AURKA, BUB1, BUB1B, TTK, UN…	375	2941	50052	1.5629e-19	8.49595e-16	6.15648e-18
biological_process	GO:0007346	regulation of mitotic cell cycle	34	CDKN1A, CENPE, CENPF, UBE2C, PLK3, E2F1, TPX2, FBXO5, BIRC5, KIF11, MAD2L1, MDM2, NEK2, NUSAP1, TRIAP1, PLK1, ANLN, AURKA, BUB1, BUB1B, TOP2A, TTK, XPC, BORA, PSRC1, CCNA2, CCNB1, TICRR, PTTG1, ESPL1, CDK1, CDC20, KIF14, CDC25C	422	472	52521	2.53681e-19	1.37901e-15	9.92094e-18
biological_process	GO:0009058	biosynthetic process	122	PLA2G4B, TOB1, CDKN1A, CEBPB, MXD4, ST6GALNAC2, CENPF, DBF4, PNRC1, ADAMTS7, CYGB, MRPL10, PLK3, KLF6, COX15, ZFP90, DDIT3, E2F1, E2F2, ELF2, HACD2, AK1, ACSL4, FDXR, MRPS27, ISCU, GAMT, ZNF385A, PHF19, ZNF337, FBXO5, NUPR1, SESN1, GCLM, BLOC1S2, ANG, C1GALT1C1, UHRF1, GTF2A1, SERTAD1, H2AFX, HMGB2, HOXA3, HOXC13, BIRC5, ACER2, IL6, IL11, INHBB, SMAD7, MCM6, MDM2, MEF2D, KITLG, ACHE, ASPH, ATF3, …	334	5967	47026	2.67951e-19	1.45658e-15	1.04041e-17
biological_process	GO:1901576	organic substance biosynthetic process	121	PLA2G4B, TOB1, CDKN1A, CEBPB, MXD4, ST6GALNAC2, CENPF, DBF4, PNRC1, ADAMTS7, CYGB, MRPL10, PLK3, KLF6, COX15, ZFP90, DDIT3, E2F1, E2F2, ELF2, HACD2, AK1, ACSL4, FDXR, MRPS27, GAMT, ZNF385A, PHF19, ZNF337, FBXO5, NUPR1, SESN1, GCLM, BLOC1S2, ANG, C1GALT1C1, UHRF1, GTF2A1, SERTAD1, H2AFX, HMGB2, HOXA3, HOXC13, BIRC5, ACER2, IL6, IL11, INHBB, SMAD7, MCM6, MDM2, MEF2D, KITLG, ACHE, ASPH, ATF3, NFIC, …	335	5881	47112	2.91955e-19	1.58707e-15	1.12558e-17
biological_process	GO:0051983	regulation of chromosome segregation	19	SPAG5, CENPE, KIF2C, UBE2C, ECT2, FBXO5, RACGAP1, MAD2L1, NEK2, PLK1, BUB1, BUB1B, TTK, CCNB1, KNSTRN, AURKB, PTTG1, ESPL1, CDC20	437	79	52914	3.57327e-19	1.94243e-15	1.36791e-17
biological_process	GO:0010467	gene expression	111	C7orf55-LUC7L2, TOB1, CDKN1A, CEBPB, MXD4, CENPF, PNRC1, MRPL10, PLK3, KLF6, HNRNPA1L2, ZFP90, DDIT3, E2F1, E2F2, DCP1B, ELF2, MRPS27, ISCU, LSM4, ZNF385A, PHF19, ZNF337, FBXO5, NUPR1, CYFIP2, SESN1, APOBEC3C, BLOC1S2, ANG, GPX1, UHRF1, GTF2A1, SERTAD1, H2AFX, HMGB2, HOXA3, HOXC13, BIRC5, ACER2, FAS, IL6, IL11, SMAD7, MDM2, MEF2D, ASPH, ATF3, NFIC, NRF1, RRM2B, CUZD1, PCNA, ZBTB7A, TRIAP1, SERPIN…	345	5148	47845	5.5758e-19	3.03101e-15	2.11958e-17
biological_process	GO:0044249	cellular biosynthetic process	119	PLA2G4B, TOB1, CDKN1A, CEBPB, MXD4, ST6GALNAC2, CENPF, DBF4, PNRC1, ADAMTS7, MRPL10, PLK3, KLF6, COX15, ZFP90, DDIT3, E2F1, E2F2, ELF2, HACD2, AK1, ACSL4, FDXR, MRPS27, GAMT, ZNF385A, PHF19, ZNF337, FBXO5, NUPR1, SESN1, GCLM, BLOC1S2, ANG, C1GALT1C1, UHRF1, GTF2A1, SERTAD1, H2AFX, HMGB2, HOXA3, HOXC13, BIRC5, ACER2, IL6, IL11, INHBB, SMAD7, MCM6, MDM2, MEF2D, KITLG, ACHE, ASPH, ATF3, NFIC, NRF1, …	337	5781	47212	6.61365e-19	3.59518e-15	2.49665e-17
biological_process	GO:0007052	mitotic spindle organization	19	NDC80, TPX2, KIF4A, RACGAP1, BIRC5, KIF11, KIFC1, NEK2, PLK1, SPC25, STIL, AURKA, TTK, BORA, PSRC1, CCNB1, PRC1, AURKB, KIF23	437	83	52910	7.69615e-19	4.18363e-15	2.88526e-17
cellular_component	GO:0000922	spindle pole	21	SPAG5, CENPF, CKAP2L, TPX2, ASPM, KIF11, MAD2L1, NEK2, PLK1, SPDL1, RANGAP1, AURKA, FAM83D, FAM110A, PSRC1, CCNB1, KNSTRN, PRC1, AURKB, DLGAP5, CDC20	435	121	52872	9.86539e-19	5.36282e-15	3.67317e-17
biological_process	GO:0007275	multicellular organismal development	105	PTPRU, ARPC5, CDKN1A, CDKN2C, TACC3, CEBPB, DPYSL4, TRIM3, CENPE, CENPF, ADAMTS7, CRIP2, RTN4RL1, DDIT3, DPYSL2, E2F1, ECT2, ACSL4, CORO1C, PLXNB2, FLRT2, KIF4A, ASPM, GAMT, ZNF385A, FBXO22, NUPR1, BLOC1S2, ANG, GPX1, GRIN2C, RACGAP1, GPSM2, H2AFX, HMGB2, HOXA3, HOXC13, FAS, IL6, SMAD7, MEF2D, ARVCF, KITLG, MKI67, ACHE, ASPH, ATF3, NEFL, NEK2, NFIC, NINJ1, NRF1, RRM2B, PCNA, ZBTB7A, SERPINF1, PGF…	351	4755	48238	1.16214e-18	6.31737e-15	4.29753e-17
biological_process	GO:0048731	system development	97	PTPRU, ARPC5, CDKN1A, CDKN2C, TACC3, CEBPB, DPYSL4, TRIM3, CENPF, ADAMTS7, CRIP2, RTN4RL1, DDIT3, DPYSL2, E2F1, ECT2, ACSL4, CORO1C, PLXNB2, FLRT2, KIF4A, ASPM, GAMT, ZNF385A, FBXO22, NUPR1, BLOC1S2, ANG, GPX1, GRIN2C, RACGAP1, GPSM2, H2AFX, HMGB2, HOXA3, HOXC13, FAS, IL6, SMAD7, MEF2D, KITLG, MKI67, ACHE, ATF3, NEFL, NFIC, NINJ1, NRF1, RRM2B, PCNA, ZBTB7A, SERPINF1, PGF, PLXNB3, ANLN, GPATCH4, L…	359	4225	48768	2.8016e-18	1.52295e-14	1.02781e-16
biological_process	GO:0034645	cellular macromolecule biosynthetic process	104	TOB1, CDKN1A, CEBPB, MXD4, ST6GALNAC2, CENPF, DBF4, PNRC1, ADAMTS7, MRPL10, PLK3, KLF6, ZFP90, DDIT3, E2F1, E2F2, ELF2, MRPS27, ZNF385A, PHF19, ZNF337, FBXO5, NUPR1, SESN1, BLOC1S2, ANG, C1GALT1C1, UHRF1, GTF2A1, SERTAD1, H2AFX, HMGB2, HOXA3, HOXC13, BIRC5, ACER2, IL6, IL11, SMAD7, MCM6, MDM2, MEF2D, KITLG, ACHE, ASPH, ATF3, NFIC, NRF1, RRM2B, PCNA, ZDHHC9, ZBTB7A, TRIAP1, PLK1, POLH, HES2, PPP1R…	352	4745	48248	2.8172e-18	1.53143e-14	1.02781e-16
cellular_component	GO:0030496	midbody	21	KIF20A, SPAG5, CENPE, CENPF, ECT2, KIF4A, ASPM, RACGAP1, BIRC5, INCENP, NEK2, PLK1, CDCA8, CEP55, AURKA, PSRC1, PRC1, AURKB, KIF23, CDK1, KIF14	435	129	52864	3.02673e-18	1.64533e-14	1.09689e-16
biological_process	GO:0010498	proteasomal protein catabolic process	32	CENPE, UBE2C, PLK3, RNF19B, DDIT3, RNF19A, FBXO22, FBXO5, UBE2S, GPX1, MAD2L1, SMAD7, MDM2, NEK2, PLK1, PMAIP1, AURKA, BUB1, BUB1B, TTK, UBE2G2, SUMO1, DERL1, TBL1XR1, NKD2, CCNB1, CCNF, AURKB, PTTG1, CDK1, CDC20, KIF14	424	443	52550	3.10707e-18	1.689e-14	1.11854e-16
biological_process	GO:0009059	macromolecule biosynthetic process	106	TOB1, CDKN1A, CEBPB, MXD4, ST6GALNAC2, CENPF, DBF4, PNRC1, ADAMTS7, CYGB, MRPL10, PLK3, KLF6, ZFP90, DDIT3, E2F1, E2F2, ELF2, MRPS27, ZNF385A, PHF19, ZNF337, FBXO5, NUPR1, SESN1, BLOC1S2, ANG, C1GALT1C1, UHRF1, GTF2A1, SERTAD1, H2AFX, HMGB2, HOXA3, HOXC13, BIRC5, ACER2, IL6, IL11, INHBB, SMAD7, MCM6, MDM2, MEF2D, KITLG, ACHE, ASPH, ATF3, NFIC, NRF1, RRM2B, PCNA, ZDHHC9, ZBTB7A, TRIAP1, PLK1, POLH…	350	4896	48097	4.1681e-18	2.26578e-14	1.49065e-16
biological_process	GO:0006974	cellular response to DNA damage stimulus	39	CDKN1A, PLK3, SPATA18, DDB2, GADD45A, DDIT3, E2F1, PHLDA3, ZNF385A, NUPR1, SESN1, UHRF1, CDIP1, H2AFX, HMGB2, KIF22, MDM2, RRM2B, PCNA, TRIAP1, PLK1, PMAIP1, POLH, NEIL3, MCM10, TIGAR, POLD4, TCEA1, TOP2A, SUMO1, UNG, XPC, BTG2, PIF1, CCNA2, TICRR, PTTG1, SUSD6, CDK1	417	732	52261	6.08912e-18	3.31004e-14	2.16343e-16
biological_process	GO:1901575	organic substance catabolic process	59	PLA2G4B, TOB1, CENPE, UBE2C, ATE1, ADAMTS7, PLK3, RNF19B, SPATA18, DDIT3, DCP1B, LSM4, RNF19A, FBXO22, FBXO5, UBE2S, APOBEC3C, GPX1, GRIN2C, UHRF1, HMGB2, HMMR, INPP1, MAD2L1, SMAD7, MDM2, ACHE, NEK2, PLK1, PMAIP1, NUDT15, PRODH, CYP26B1, TIGAR, BCAT1, LDAH, SCP2, PJA1, AURKA, BUB1, BUB1B, TTK, UBE2G2, SUMO1, UNG, BTG2, DERL1, TBL1XR1, FAM83D, SESN2, NKD2, CCNB1, STBD1, CCNF, AURKB, PTTG1, CDK1, …	397	1759	51234	7.88309e-18	4.28525e-14	2.78263e-16
biological_process	GO:0044257	cellular protein catabolic process	36	CENPE, UBE2C, ATE1, ADAMTS7, PLK3, RNF19B, SPATA18, DDIT3, RNF19A, FBXO22, FBXO5, UBE2S, GPX1, UHRF1, MAD2L1, SMAD7, MDM2, NEK2, PLK1, PMAIP1, AURKA, BUB1, BUB1B, TTK, UBE2G2, SUMO1, DERL1, TBL1XR1, NKD2, CCNB1, CCNF, AURKB, PTTG1, CDK1, CDC20, KIF14	420	622	52371	1.24264e-17	6.75498e-14	4.35805e-16
biological_process	GO:0030163	protein catabolic process	39	CENPE, UBE2C, ATE1, ADAMTS7, PLK3, RNF19B, SPATA18, DDIT3, RNF19A, FBXO22, FBXO5, UBE2S, GPX1, GRIN2C, UHRF1, MAD2L1, SMAD7, MDM2, NEK2, PLK1, PMAIP1, PJA1, AURKA, BUB1, BUB1B, TTK, UBE2G2, SUMO1, DERL1, TBL1XR1, FAM83D, NKD2, CCNB1, CCNF, AURKB, PTTG1, CDK1, CDC20, KIF14	417	753	52240	1.47638e-17	8.02562e-14	5.14463e-16
biological_process	GO:0051603	proteolysis involved in cellular protein catabolic process	35	CENPE, UBE2C, ATE1, ADAMTS7, PLK3, RNF19B, DDIT3, RNF19A, FBXO22, FBXO5, UBE2S, GPX1, UHRF1, MAD2L1, SMAD7, MDM2, NEK2, PLK1, PMAIP1, AURKA, BUB1, BUB1B, TTK, UBE2G2, SUMO1, DERL1, TBL1XR1, NKD2, CCNB1, CCNF, AURKB, PTTG1, CDK1, CDC20, KIF14	421	593	52400	2.15421e-17	1.17103e-13	7.45877e-16
biological_process	GO:0045786	negative regulation of cell cycle	32	CDKN1A, CDKN2C, CDKN3, UBE2C, PLK3, GADD45A, DDIT3, AK1, FBXO5, NUPR1, SESN1, GAS2L3, MAD2L1, MDM2, TRIAP1, PLK1, PRKAB1, BUB1, BUB1B, TOP2A, TTK, XPC, E2F8, CCNA2, CCNB1, CCNF, TICRR, AURKB, PTTG1, TP53INP1, CDK1, CDC20	424	479	52514	2.44372e-17	1.32841e-13	8.40763e-16
molecular_function	GO:0043167	ion binding	118	EFCAB10, ARL17B, KIF20A, CDKN1A, LOC102724428, TRIM3, CENPE, DBF4, KIF2C, UBE2C, ADAMTS7, CYGB, OSBPL8, PLK3, RNF19B, KLF6, CRIP2, MIB2, ZFP90, KIF18B, DGKA, AK1, ACSL4, VWCE, FDXR, HSPA4L, TPX2, ISCU, PHLDA3, KIF4A, RNF19A, ZNF385A, PHF19, ZNF337, FBXO5, UBE2S, APOBEC3C, ANG, GPX1, RACGAP1, UHRF1, BIRC5, INPP1, ITPK1, KIF11, KIFC1, KIF22, SMAD7, MDM2, MKI67, ACHE, ASPH, NEK2, RRM2B, AK3, ZDHHC9,…	338	6001	46992	2.59564e-17	1.41099e-13	8.87415e-16
biological_process	GO:0016310	phosphorylation	63	CDKN1A, LOC102724428, CDKN2C, CDKN3, CENPE, OSBPL8, PLK3, COX15, DGKA, GADD45A, ECT2, AK1, TPX2, CORO1C, PLXNB2, FYB, ANG, GRIN2C, SERTAD1, BIRC5, IGFBP3, IL6, IL11, INHBB, INPP1, ITPK1, SMAD7, KITLG, ATF3, NEFL, NEK2, AK3, PLK1, PRKAB1, ADCK3, TIGAR, RAP2B, EDA2R, STIL, NME1-NME2, AURKA, BUB1, BUB1B, TTK, WEE1, SH3BP5L, FAM83D, SESN2, BTBD10, PSRC1, NRP1, CCNA2, CCNB1, CCNG1, DYRK1B, NEK9, AURKB…	393	2060	50933	3.47794e-17	1.89061e-13	1.18163e-15
biological_process	GO:0043161	proteasome-mediated ubiquitin-dependent protein catabolic process	30	CENPE, UBE2C, PLK3, RNF19B, DDIT3, RNF19A, FBXO22, FBXO5, UBE2S, MAD2L1, SMAD7, MDM2, NEK2, PLK1, AURKA, BUB1, BUB1B, TTK, UBE2G2, SUMO1, DERL1, TBL1XR1, NKD2, CCNB1, CCNF, AURKB, PTTG1, CDK1, CDC20, KIF14	426	420	52573	5.4059e-17	2.93865e-13	1.82081e-15
biological_process	GO:0009057	macromolecule catabolic process	46	TOB1, CENPE, UBE2C, ATE1, ADAMTS7, PLK3, RNF19B, SPATA18, DDIT3, DCP1B, LSM4, RNF19A, FBXO22, FBXO5, UBE2S, GPX1, GRIN2C, UHRF1, HMGB2, HMMR, MAD2L1, SMAD7, MDM2, NEK2, PLK1, PMAIP1, PJA1, AURKA, BUB1, BUB1B, TTK, UBE2G2, SUMO1, BTG2, DERL1, TBL1XR1, FAM83D, NKD2, CCNB1, STBD1, CCNF, AURKB, PTTG1, CDK1, CDC20, KIF14	410	1121	51872	5.42625e-17	2.94971e-13	1.82081e-15
biological_process	GO:0044265	cellular macromolecule catabolic process	41	TOB1, CENPE, UBE2C, ATE1, ADAMTS7, PLK3, RNF19B, SPATA18, DDIT3, DCP1B, LSM4, RNF19A, FBXO22, FBXO5, UBE2S, GPX1, UHRF1, HMGB2, MAD2L1, SMAD7, MDM2, NEK2, PLK1, PMAIP1, AURKA, BUB1, BUB1B, TTK, UBE2G2, SUMO1, BTG2, DERL1, TBL1XR1, NKD2, CCNB1, CCNF, AURKB, PTTG1, CDK1, CDC20, KIF14	415	897	52096	1.12623e-16	6.12221e-13	3.75596e-15
biological_process	GO:0032270	positive regulation of cellular protein metabolic process	51	CDKN1A, CENPE, UBE2C, OSBPL8, PLK3, RNF19B, CDCA2, GADD45A, ECT2, TPX2, RNF19A, PHF19, FBXO22, FBXO5, NUPR1, CYFIP2, UBE2S, ANG, GRIN2C, UHRF1, ACER2, IGFBP3, FAS, IL6, IL11, INHBB, SMAD7, MDM2, KITLG, ASPH, NEFL, PLK1, PMAIP1, DIABLO, RAP2B, EDA2R, STIL, AURKA, TTK, SUMO1, DERL1, PSRC1, NKD2, TNFRSF10B, NRP1, CCNB1, GDF15, TRAF4, CDK1, CDC20, KIF14	405	1411	51582	1.14334e-16	6.21521e-13	3.78976e-15
biological_process	GO:0000910	cytokinesis	21	KIF20A, CDKN1A, PLK3, ECT2, KIF4A, RACGAP1, BIRC5, INCENP, NUSAP1, PLK1, SEPT5, ANLN, CEP55, STIL, AURKA, E2F8, PSRC1, PRC1, AURKB, KIF23, KIF14	435	159	52834	1.18543e-16	6.444e-13	3.90545e-15
biological_process	GO:0007088	regulation of mitotic nuclear division	20	CENPE, UBE2C, FBXO5, BIRC5, KIF11, MAD2L1, NEK2, NUSAP1, PLK1, ANLN, AURKA, BUB1, BUB1B, TTK, BORA, CCNB1, PTTG1, ESPL1, CDC20, CDC25C	436	137	52856	1.35725e-16	7.37801e-13	4.44459e-15
biological_process	GO:0006259	DNA metabolic process	40	CDKN1A, CENPF, DBF4, DDB2, GADD45A, APOBEC3C, UHRF1, H2AFX, HMGB2, IL6, KIF22, KPNA2, MCM6, KITLG, MKI67, ACHE, NFIC, RRM2B, PCNA, POLH, NEIL3, MEG3, MCM10, TIGAR, POLD4, TCEA1, TOP2A, SUMO1, UNG, XPC, BTG2, SLBP, E2F8, PIF1, SESN2, TICRR, PTTG1, CDK1, CDC25A, CDC25C	416	857	52136	1.45866e-16	7.92926e-13	4.74806e-15
cellular_component	GO:0072686	mitotic spindle	15	SPAG5, CENPE, ECT2, ASPM, RACGAP1, KIF22, MAD2L1, NUSAP1, RANGAP1, AURKA, FAM83D, KNSTRN, KIF23, ESPL1, CDK1	441	51	52942	3.53351e-16	1.92082e-12	1.14334e-14
biological_process	GO:0006511	ubiquitin-dependent protein catabolic process	32	CENPE, UBE2C, ATE1, PLK3, RNF19B, DDIT3, RNF19A, FBXO22, FBXO5, UBE2S, UHRF1, MAD2L1, SMAD7, MDM2, NEK2, PLK1, AURKA, BUB1, BUB1B, TTK, UBE2G2, SUMO1, DERL1, TBL1XR1, NKD2, CCNB1, CCNF, AURKB, PTTG1, CDK1, CDC20, KIF14	424	532	52461	3.79623e-16	2.06363e-12	1.22108e-14
biological_process	GO:0042127	regulation of cell proliferation	51	PTPRU, TOB1, CDKN1A, CDKN2C, CDKN3, CEBPB, MXD4, CRIP2, E2F1, ALDH3A1, VWCE, ICOSLG, ASPM, NUPR1, SESN1, BLOC1S2, ANG, GPX1, SERTAD1, HMGB2, HOXA3, BIRC5, ACER2, IGFBP3, IL6, IL11, MDM2, KITLG, ASPH, SERPINF1, PGF, PLXNB3, PMAIP1, MEG3, TTK, BTG2, SHCBP1, HIST1H2AC, PPM1D, TNFSF9, NRP1, CCNA2, CCNB1, C9orf69, PRC1, CCPG1, NTN1, TP53INP1, TP53I11, CDC20, KIF14	405	1464	51529	4.67192e-16	2.53966e-12	1.49392e-14
biological_process	GO:0031399	regulation of protein modification process	55	CDKN1A, CDKN2C, CDKN3, CENPE, UBE2C, OSBPL8, CDCA2, GADD45A, ECT2, TPX2, CORO1C, PLXNB2, PHF19, FBXO22, FBXO5, NUPR1, UBE2S, ANG, GRIN2C, SERTAD1, ACER2, IGFBP3, IL6, IL11, INHBB, MAD2L1, SMAD7, KITLG, ATF3, NEFL, PLK1, PPP2R2C, PRKAB1, RAP2B, EDA2R, STIL, BUB1, BUB1B, TTK, DERL1, SH3BP5L, FAM83D, SESN2, PSRC1, NRP1, CCNA2, CCNB1, CCNG1, GDF15, TRAF4, CDK1, CDC20, KIF14, CDC25A, CDC25C	401	1695	51298	4.79344e-16	2.60571e-12	1.52381e-14
biological_process	GO:0019941	modification-dependent protein catabolic process	32	CENPE, UBE2C, ATE1, PLK3, RNF19B, DDIT3, RNF19A, FBXO22, FBXO5, UBE2S, UHRF1, MAD2L1, SMAD7, MDM2, NEK2, PLK1, AURKA, BUB1, BUB1B, TTK, UBE2G2, SUMO1, DERL1, TBL1XR1, NKD2, CCNB1, CCNF, AURKB, PTTG1, CDK1, CDC20, KIF14	424	538	52455	5.07902e-16	2.76096e-12	1.60521e-14
biological_process	GO:0033036	macromolecule localization	70	C15orf38-AP3S2, PTPRU, KIF20A, TOB1, CDKN1A, TACC3, CENPA, TRIM3, SPAG5, CENPF, OSBPL8, PLK3, RNF19B, HNRNPA1L2, E2F1, ECT2, STOM, ACSL4, ARL6IP1, ASTN2, CORO1C, FYB, ZNF385A, ANG, GRIN2C, RACGAP1, BIRC5, IL6, INHBB, KPNA2, SMAD7, MDM2, ACHE, ASPH, NEK2, ZDHHC9, TRIAP1, PLK1, PMAIP1, VPS13C, SPDL1, CEP55, LGR4, SPATA7, GOPC, PEX19, RANGAP1, LDAH, SCP2, STIL, SSR3, AURKA, VAMP2, TAP1, BUB1B, UBE2G…	386	2652	50341	6.20035e-16	3.37051e-12	1.94827e-14
biological_process	GO:0009056	catabolic process	63	PLA2G4B, TOB1, CENPE, UBE2C, ATE1, ADAMTS7, PLK3, RNF19B, SPATA18, DDIT3, DCP1B, STOM, LSM4, RNF19A, FBXO22, FBXO5, UBE2S, APOBEC3C, GPX1, GRIN2C, UHRF1, HMGB2, HMMR, INPP1, MAD2L1, SMAD7, MDM2, ACHE, NEK2, PLK1, PMAIP1, NUDT15, PRKAB1, PRODH, CYP26B1, TIGAR, BCAT1, LDAH, SCP2, PJA1, AURKA, BUB1, BUB1B, TTK, UBE2G2, SUMO1, UNG, BTG2, DERL1, TBL1XR1, FAM83D, SESN2, NKD2, CES2, CCNB1, STBD1, CCNF, …	393	2202	50791	7.01455e-16	3.81311e-12	2.19144e-14
biological_process	GO:0043632	modification-dependent macromolecule catabolic process	32	CENPE, UBE2C, ATE1, PLK3, RNF19B, DDIT3, RNF19A, FBXO22, FBXO5, UBE2S, UHRF1, MAD2L1, SMAD7, MDM2, NEK2, PLK1, AURKA, BUB1, BUB1B, TTK, UBE2G2, SUMO1, DERL1, TBL1XR1, NKD2, CCNB1, CCNF, AURKB, PTTG1, CDK1, CDC20, KIF14	424	546	52447	7.44552e-16	4.04739e-12	2.31279e-14
biological_process	GO:0010941	regulation of cell death	51	CDKN1A, CEBPB, PLK3, GADD45A, DDIT3, E2F1, ECT2, PHLDA3, ZNF385A, NUPR1, GCLM, GPX1, HMGB2, BIRC5, ACER2, IGFBP3, FAS, IL6, IL11, INHBB, MAD2L1, MDM2, KITLG, ATF3, NEFL, RRM2B, TRIAP1, SERPINF1, PLK1, PMAIP1, ATAD3A, G2E3, DIABLO, TIGAR, STIL, AURKA, BUB1, TOP2A, UCP2, BTG2, TXNDC5, BTBD10, TNFRSF10D, TNFRSF10B, NRP1, AURKB, TP53INP1, GDF15, TRAF4, CDK1, KIF14	405	1488	51505	8.65185e-16	4.70314e-12	2.67224e-14
biological_process	GO:0051234	establishment of localization	96	C15orf38-AP3S2, ARPC5, KIF20A, TOB1, CDKN1A, NDC80, TACC3, CENPA, TRIM3, SPAG5, TGOLN2, CENPE, CENPF, KIF2C, CYGB, OSBPL8, PLK3, RNF19B, COX15, HNRNPA1L2, DDIT3, DPYSL2, E2F1, ECT2, STOM, ACSL4, ARL6IP1, CORO1C, KIF4A, FYB, FBXO22, CYFIP2, NSG1, SLCO4A1, BLOC1S2, ANG, GRIN2C, RACGAP1, GPSM2, BIRC5, IL6, IL11, INHBB, KIFC1, KIF22, KPNA2, MDM2, ACHE, ASPH, NEFL, ZDHHC9, NUSAP1, TRIAP1, PLK1, PMAIP1…	360	4550	48443	8.96037e-16	4.87086e-12	2.7519e-14
biological_process	GO:0051247	positive regulation of protein metabolic process	51	CDKN1A, CENPE, UBE2C, OSBPL8, PLK3, RNF19B, CDCA2, GADD45A, ECT2, TPX2, RNF19A, PHF19, FBXO22, FBXO5, NUPR1, CYFIP2, UBE2S, ANG, GRIN2C, UHRF1, ACER2, IGFBP3, FAS, IL6, IL11, INHBB, SMAD7, MDM2, KITLG, ASPH, NEFL, PLK1, PMAIP1, DIABLO, RAP2B, EDA2R, STIL, AURKA, TTK, SUMO1, DERL1, PSRC1, NKD2, TNFRSF10B, NRP1, CCNB1, GDF15, TRAF4, CDK1, CDC20, KIF14	405	1505	51488	1.32843e-15	7.22132e-12	4.05692e-14
biological_process	GO:0042981	regulation of apoptotic process	49	CDKN1A, CEBPB, PLK3, GADD45A, DDIT3, E2F1, ECT2, PHLDA3, ZNF385A, NUPR1, GCLM, GPX1, HMGB2, BIRC5, ACER2, IGFBP3, FAS, IL6, IL11, INHBB, MAD2L1, MDM2, KITLG, ATF3, NEFL, RRM2B, TRIAP1, PLK1, PMAIP1, ATAD3A, G2E3, DIABLO, TIGAR, STIL, AURKA, BUB1, TOP2A, UCP2, BTG2, TXNDC5, TNFRSF10D, TNFRSF10B, NRP1, AURKB, TP53INP1, GDF15, TRAF4, CDK1, KIF14	407	1393	51600	1.3621e-15	7.40435e-12	4.13651e-14
molecular_function	GO:0043168	anion binding	69	ARL17B, KIF20A, LOC102724428, CENPE, KIF2C, UBE2C, OSBPL8, PLK3, KIF18B, DGKA, AK1, ACSL4, FDXR, HSPA4L, TPX2, PHLDA3, KIF4A, UBE2S, ANG, GPX1, RACGAP1, ITPK1, KIF11, KIFC1, KIF22, MKI67, NEK2, AK3, PGF, PLK1, SEPT5, ERCC6L, NADSYN1, ATAD3A, PRODH, CYP26B1, KIF15, ADCK3, ACTA2, RAP2B, RRAD, SCP2, NME1-NME2, AURKA, VAMP2, TAP1, BUB1, BUB1B, TOP2A, TTK, TUBA4A, UBE2G2, WEE1, NLRX1, PIF1, KIF18A, NT…	387	2629	50364	1.37395e-15	7.46881e-12	4.14934e-14
cellular_component	GO:0005815	microtubule organizing center	33	TACC3, SPAG5, PLK3, CKAP2L, RNF19A, BLOC1S2, BIRC5, KIFC1, NEK2, PCNA, PLK1, ERCC6L, SPDL1, CEP55, SPATA7, KIF15, NCAPG, CCDC14, STIL, AURKA, BUB1B, TOP2A, KIF18A, FAM110A, CCNB1, CCNF, CCNB2, AURKB, KIF23, ESPL1, DLGAP5, CDK1, CDC20	423	603	52390	1.51497e-15	8.23537e-12	4.54993e-14
biological_process	GO:0051338	regulation of transferase activity	41	CDKN1A, CDKN2C, CDKN3, CENPE, UBE2C, OSBPL8, GADD45A, ECT2, TPX2, CORO1C, FBXO5, UBE2S, ANG, GRIN2C, SERTAD1, IL6, MAD2L1, SMAD7, KITLG, NEFL, PLK1, PRKAB1, TIGAR, RAP2B, STIL, BUB1, BUB1B, TTK, PIF1, SH3BP5L, SESN2, PSRC1, CCNA2, CCNB1, CCNG1, TRAF4, CDK1, CDC20, KIF14, CDC25A, CDC25C	415	976	52017	1.66895e-15	9.07243e-12	4.98485e-14
biological_process	GO:0044271	cellular nitrogen compound biosynthetic process	97	TOB1, CDKN1A, CEBPB, MXD4, ST6GALNAC2, CENPF, PNRC1, MRPL10, PLK3, KLF6, COX15, ZFP90, DDIT3, E2F1, E2F2, ELF2, AK1, MRPS27, ZNF385A, PHF19, ZNF337, FBXO5, NUPR1, SESN1, GCLM, BLOC1S2, ANG, UHRF1, GTF2A1, SERTAD1, H2AFX, HMGB2, HOXA3, HOXC13, BIRC5, ACER2, IL6, IL11, SMAD7, MDM2, MEF2D, ASPH, ATF3, NFIC, NRF1, RRM2B, AK3, PCNA, ZBTB7A, TRIAP1, PLK1, POLH, HES2, NADSYN1, LGR4, MEG3, MED29, DEPDC1,…	359	4667	48326	1.76e-15	9.56738e-12	5.20322e-14
biological_process	GO:0043067	regulation of programmed cell death	49	CDKN1A, CEBPB, PLK3, GADD45A, DDIT3, E2F1, ECT2, PHLDA3, ZNF385A, NUPR1, GCLM, GPX1, HMGB2, BIRC5, ACER2, IGFBP3, FAS, IL6, IL11, INHBB, MAD2L1, MDM2, KITLG, ATF3, NEFL, RRM2B, TRIAP1, PLK1, PMAIP1, ATAD3A, G2E3, DIABLO, TIGAR, STIL, AURKA, BUB1, TOP2A, UCP2, BTG2, TXNDC5, TNFRSF10D, TNFRSF10B, NRP1, AURKB, TP53INP1, GDF15, TRAF4, CDK1, KIF14	407	1403	51590	1.7683e-15	9.61246e-12	5.20322e-14
biological_process	GO:0008104	protein localization	64	C15orf38-AP3S2, PTPRU, KIF20A, TOB1, CDKN1A, TACC3, CENPA, TRIM3, SPAG5, CENPF, OSBPL8, PLK3, RNF19B, E2F1, ECT2, STOM, ARL6IP1, ASTN2, CORO1C, FYB, ANG, GRIN2C, RACGAP1, BIRC5, IL6, INHBB, KPNA2, SMAD7, MDM2, ACHE, ASPH, NEK2, ZDHHC9, PLK1, PMAIP1, VPS13C, SPDL1, CEP55, LGR4, SPATA7, GOPC, PEX19, RANGAP1, SCP2, STIL, SSR3, AURKA, VAMP2, TAP1, BUB1B, UBE2G2, SUMO1, UCP2, DERL1, BORA, FAM83D, KIF1…	392	2313	50680	1.77078e-15	9.62596e-12	5.20322e-14
biological_process	GO:0051783	regulation of nuclear division	20	CENPE, UBE2C, FBXO5, BIRC5, KIF11, MAD2L1, NEK2, NUSAP1, PLK1, ANLN, AURKA, BUB1, BUB1B, TTK, BORA, CCNB1, PTTG1, ESPL1, CDC20, CDC25C	436	161	52832	1.99973e-15	1.08705e-11	5.84438e-14
biological_process	GO:0030154	cell differentiation	83	PTPRU, ARPC5, TOB1, CDKN1A, CDKN2C, TACC3, CEBPB, DPYSL4, CENPF, CFL2, ADAMTS7, OSBPL8, RTN4RL1, DDIT3, DPYSL2, E2F1, ECT2, ELF2, ACSL4, CORO1C, PLXNB2, FLRT2, KIF4A, ASPM, ZNF385A, PHF19, FBXO22, FBXO5, NUPR1, BLOC1S2, GPX1, GRIN2C, C1GALT1C1, RACGAP1, GPSM2, HMGB2, IGFBP3, FAS, IL6, INHBB, SMAD7, MEF2D, KITLG, ACHE, ATF3, NEFL, PCNA, ZBTB7A, SERPINF1, PGF, PLXNB3, ANLN, GPATCH4, LGR4, MEG3, SUL…	373	3661	49332	2.98266e-15	1.62137e-11	8.67044e-14
biological_process	GO:1901987	regulation of cell cycle phase transition	24	CDKN1A, CENPE, CENPF, UBE2C, PLK3, E2F1, FBXO5, BIRC5, MAD2L1, MDM2, TRIAP1, PLK1, ANLN, BUB1, BUB1B, TTK, XPC, FAM83D, CCNA2, CCNB1, TICRR, CDK1, CDC20, KIF14	432	281	52712	3.3219e-15	1.80579e-11	9.60524e-14
biological_process	GO:0006508	proteolysis	51	ABHD14A-ACY1, CENPE, UBE2C, PRSS23, ATE1, ADAMTS7, PLK3, RNF19B, DDIT3, RNF19A, FBXO22, FBXO5, CYFIP2, UBE2S, GPX1, UHRF1, BIRC5, ACER2, FAS, IL6, MAD2L1, SMAD7, MDM2, ASPH, NEK2, CUZD1, TRIAP1, SERPINF1, PLK1, PMAIP1, DIABLO, AURKA, BUB1, BUB1B, TTK, UBE2G2, SUMO1, CHAC1, DERL1, TBL1XR1, NKD2, TNFRSF10B, CCNB1, CCNF, AURKB, PTTG1, PREPL, ESPL1, CDK1, CDC20, KIF14	405	1552	51441	4.21082e-15	2.289e-11	1.21111e-13
biological_process	GO:0044248	cellular catabolic process	56	PLA2G4B, TOB1, CENPE, UBE2C, ATE1, ADAMTS7, PLK3, RNF19B, SPATA18, DDIT3, DCP1B, STOM, LSM4, RNF19A, FBXO22, FBXO5, UBE2S, APOBEC3C, GPX1, UHRF1, HMGB2, MAD2L1, SMAD7, MDM2, ACHE, NEK2, PLK1, PMAIP1, NUDT15, PRKAB1, PRODH, CYP26B1, TIGAR, BCAT1, SCP2, AURKA, BUB1, BUB1B, TTK, UBE2G2, SUMO1, UNG, BTG2, DERL1, TBL1XR1, SESN2, NKD2, CCNB1, STBD1, CCNF, AURKB, PTTG1, TP53INP1, CDK1, CDC20, KIF14	400	1858	51135	4.92217e-15	2.67569e-11	1.40826e-13
molecular_function	GO:0008017	microtubule binding	21	KIF20A, CENPE, KIF2C, KIF18B, DPYSL2, KIF4A, GAS2L3, RACGAP1, BIRC5, KIF11, KIFC1, KIF22, NUSAP1, PLK1, KIF15, FAM83D, KIF18A, PSRC1, PRC1, KIF23, KIF14	435	198	52795	5.527e-15	3.00448e-11	1.57302e-13
molecular_function	GO:0035639	purine ribonucleoside triphosphate binding	55	ARL17B, KIF20A, LOC102724428, CENPE, KIF2C, UBE2C, PLK3, KIF18B, DGKA, AK1, ACSL4, HSPA4L, TPX2, KIF4A, UBE2S, ITPK1, KIF11, KIFC1, KIF22, MKI67, NEK2, AK3, PLK1, SEPT5, ERCC6L, NADSYN1, ATAD3A, KIF15, ADCK3, ACTA2, RAP2B, RRAD, NME1-NME2, AURKA, TAP1, BUB1, BUB1B, TOP2A, TTK, TUBA4A, UBE2G2, WEE1, NLRX1, PIF1, KIF18A, NTPCR, RNGTT, C9orf69, DYRK1B, NEK9, AURKB, KIF23, CDK1, TRANK1, KIF14	401	1804	51189	5.75245e-15	3.12703e-11	1.62866e-13
molecular_function	GO:0000166	nucleotide binding	63	ARL17B, KIF20A, LOC102724428, CENPE, KIF2C, UBE2C, PLK3, HNRNPA1L2, KIF18B, DGKA, AK1, ACSL4, FDXR, HSPA4L, TPX2, KIF4A, UBE2S, UHRF1, ITPK1, KIF11, KIFC1, KIF22, MKI67, NEK2, AK3, PLK1, SEPT5, ERCC6L, NADSYN1, ATAD3A, TMEM63B, PRODH, KIF15, ADCK3, ACTA2, RAP2B, RRAD, NME1-NME2, AURKA, TAP1, BUB1, BUB1B, TOP2A, TTK, TUBA4A, UBE2G2, WEE1, NLRX1, PIF1, KIF18A, NTPCR, RNGTT, C9orf69, DYRK1B, NEK9, A…	393	2311	50682	5.91671e-15	3.21633e-11	1.6579e-13
molecular_function	GO:1901265	nucleoside phosphate binding	63	ARL17B, KIF20A, LOC102724428, CENPE, KIF2C, UBE2C, PLK3, HNRNPA1L2, KIF18B, DGKA, AK1, ACSL4, FDXR, HSPA4L, TPX2, KIF4A, UBE2S, UHRF1, ITPK1, KIF11, KIFC1, KIF22, MKI67, NEK2, AK3, PLK1, SEPT5, ERCC6L, NADSYN1, ATAD3A, TMEM63B, PRODH, KIF15, ADCK3, ACTA2, RAP2B, RRAD, NME1-NME2, AURKA, TAP1, BUB1, BUB1B, TOP2A, TTK, TUBA4A, UBE2G2, WEE1, NLRX1, PIF1, KIF18A, NTPCR, RNGTT, C9orf69, DYRK1B, NEK9, A…	393	2311	50682	5.91671e-15	3.21633e-11	1.6579e-13
biological_process	GO:1901362	organic cyclic compound biosynthetic process	91	TOB1, CDKN1A, CEBPB, MXD4, CENPF, PNRC1, PLK3, KLF6, COX15, ZFP90, DDIT3, E2F1, E2F2, ELF2, AK1, FDXR, ZNF385A, PHF19, ZNF337, FBXO5, NUPR1, SESN1, BLOC1S2, ANG, UHRF1, GTF2A1, SERTAD1, H2AFX, HMGB2, HOXA3, HOXC13, BIRC5, IL6, IL11, SMAD7, MDM2, MEF2D, ASPH, ATF3, NFIC, NRF1, RRM2B, AK3, PCNA, ZBTB7A, TRIAP1, PLK1, POLH, HES2, NADSYN1, LGR4, MEG3, MED29, DEPDC1, PRKAB1, RGMA, TIGAR, SFMBT2, ANKRA…	365	4309	48684	6.17627e-15	3.35742e-11	1.72175e-13
molecular_function	GO:0032550	purine ribonucleoside binding	55	ARL17B, KIF20A, LOC102724428, CENPE, KIF2C, UBE2C, PLK3, KIF18B, DGKA, AK1, ACSL4, HSPA4L, TPX2, KIF4A, UBE2S, ITPK1, KIF11, KIFC1, KIF22, MKI67, NEK2, AK3, PLK1, SEPT5, ERCC6L, NADSYN1, ATAD3A, KIF15, ADCK3, ACTA2, RAP2B, RRAD, NME1-NME2, AURKA, TAP1, BUB1, BUB1B, TOP2A, TTK, TUBA4A, UBE2G2, WEE1, NLRX1, PIF1, KIF18A, NTPCR, RNGTT, C9orf69, DYRK1B, NEK9, AURKB, KIF23, CDK1, TRANK1, KIF14	401	1811	51182	6.70178e-15	3.64309e-11	1.85872e-13
biological_process	GO:1901990	regulation of mitotic cell cycle phase transition	23	CDKN1A, CENPE, CENPF, UBE2C, PLK3, E2F1, FBXO5, BIRC5, MAD2L1, MDM2, TRIAP1, PLK1, ANLN, BUB1, BUB1B, TTK, XPC, CCNA2, CCNB1, TICRR, CDK1, CDC20, KIF14	433	260	52733	7.08143e-15	3.84947e-11	1.95404e-13
molecular_function	GO:0001883	purine nucleoside binding	55	ARL17B, KIF20A, LOC102724428, CENPE, KIF2C, UBE2C, PLK3, KIF18B, DGKA, AK1, ACSL4, HSPA4L, TPX2, KIF4A, UBE2S, ITPK1, KIF11, KIFC1, KIF22, MKI67, NEK2, AK3, PLK1, SEPT5, ERCC6L, NADSYN1, ATAD3A, KIF15, ADCK3, ACTA2, RAP2B, RRAD, NME1-NME2, AURKA, TAP1, BUB1, BUB1B, TOP2A, TTK, TUBA4A, UBE2G2, WEE1, NLRX1, PIF1, KIF18A, NTPCR, RNGTT, C9orf69, DYRK1B, NEK9, AURKB, KIF23, CDK1, TRANK1, KIF14	401	1814	51179	7.15346e-15	3.88862e-11	1.95408e-13
molecular_function	GO:0032549	ribonucleoside binding	55	ARL17B, KIF20A, LOC102724428, CENPE, KIF2C, UBE2C, PLK3, KIF18B, DGKA, AK1, ACSL4, HSPA4L, TPX2, KIF4A, UBE2S, ITPK1, KIF11, KIFC1, KIF22, MKI67, NEK2, AK3, PLK1, SEPT5, ERCC6L, NADSYN1, ATAD3A, KIF15, ADCK3, ACTA2, RAP2B, RRAD, NME1-NME2, AURKA, TAP1, BUB1, BUB1B, TOP2A, TTK, TUBA4A, UBE2G2, WEE1, NLRX1, PIF1, KIF18A, NTPCR, RNGTT, C9orf69, DYRK1B, NEK9, AURKB, KIF23, CDK1, TRANK1, KIF14	401	1814	51179	7.15346e-15	3.88862e-11	1.95408e-13
biological_process	GO:0048583	regulation of response to stimulus	80	ARPC5, TOB1, CDKN1A, OSBPL8, MIB2, GADD45A, DDIT3, E2F1, ECT2, STOM, VWCE, PHLDA3, FYB, LSM4, ASPM, ZNF385A, CYFIP2, SESN1, GCLM, GPX1, GRIN2C, RACGAP1, HMGB2, BIRC5, IGFBP3, FAS, IL6, IL11, INHBB, SMAD7, MDM2, KITLG, ASPH, ATF3, NEFL, RRM2B, RDH11, PCNA, TRIAP1, SERPINF1, PMAIP1, POLH, LGR4, MEG3, G2E3, DEPDC1B, SULF2, CYP26B1, TMEM9B, RGMA, TIGAR, EDA2R, SDF2, EPS8L2, VAMP2, TAP1, BUB1, TTK, UB…	376	3502	49491	7.31211e-15	3.97486e-11	1.98743e-13
biological_process	GO:0010605	negative regulation of macromolecule metabolic process	62	TOB1, CDKN1A, CDKN2C, CEBPB, MXD4, CENPF, UBE2C, CYGB, PLK3, ZFP90, GADD45A, DDIT3, E2F1, ELF2, CORO1C, PHF19, FBXO5, ANG, GPX1, GRIN2C, UHRF1, H2AFX, HMGB2, BIRC5, ACER2, IGFBP3, FAS, IL6, INHBB, MAD2L1, SMAD7, MDM2, ATF3, NFIC, ZBTB7A, TRIAP1, SERPINF1, PLK1, HES2, LGR4, MEG3, DEPDC1, SFMBT2, BUB1, BUB1B, TTK, UBE2G2, SUMO1, BTG2, CHAC1, TBL1XR1, E2F8, PIF1, SH3BP5L, HIST1H2AC, MXD3, TNFRSF10B,…	394	2259	50734	7.60181e-15	4.13234e-11	2.05589e-13
biological_process	GO:0051649	establishment of localization in cell	66	C15orf38-AP3S2, TOB1, CDKN1A, NDC80, TACC3, CENPA, SPAG5, TGOLN2, CENPE, CENPF, KIF2C, PLK3, RNF19B, DDIT3, DPYSL2, E2F1, ECT2, STOM, ARL6IP1, KIF4A, FYB, FBXO22, NSG1, BLOC1S2, ANG, GPSM2, BIRC5, IL6, IL11, INHBB, KIFC1, KIF22, KPNA2, ACHE, ASPH, NEFL, ZDHHC9, NUSAP1, PMAIP1, SEPT5, VPS13C, SPDL1, CDCA8, CEP55, LGR4, MEG3, PEX19, RANGAP1, SCP2, CREB3L2, SSR3, VAMP2, TAP1, TUBA4A, UBE2G2, UCP2, S…	390	2524	50469	7.71602e-15	4.19443e-11	2.07645e-13
molecular_function	GO:0001882	nucleoside binding	55	ARL17B, KIF20A, LOC102724428, CENPE, KIF2C, UBE2C, PLK3, KIF18B, DGKA, AK1, ACSL4, HSPA4L, TPX2, KIF4A, UBE2S, ITPK1, KIF11, KIFC1, KIF22, MKI67, NEK2, AK3, PLK1, SEPT5, ERCC6L, NADSYN1, ATAD3A, KIF15, ADCK3, ACTA2, RAP2B, RRAD, NME1-NME2, AURKA, TAP1, BUB1, BUB1B, TOP2A, TTK, TUBA4A, UBE2G2, WEE1, NLRX1, PIF1, KIF18A, NTPCR, RNGTT, C9orf69, DYRK1B, NEK9, AURKB, KIF23, CDK1, TRANK1, KIF14	401	1821	51172	8.32464e-15	4.52528e-11	2.2292e-13
molecular_function	GO:0097367	carbohydrate derivative binding	61	ARL17B, KIF20A, LOC102724428, CENPE, KIF2C, UBE2C, OSBPL8, PLK3, KIF18B, DGKA, AK1, ACSL4, HSPA4L, TPX2, KIF4A, UBE2S, ANG, HMMR, ITPK1, KIF11, KIFC1, KIF22, MKI67, NEK2, AK3, PGF, PLK1, SEPT5, ERCC6L, NADSYN1, ATAD3A, RGMA, KIF15, ADCK3, ACTA2, RAP2B, RRAD, NME1-NME2, AURKA, TAP1, BUB1, BUB1B, TOP2A, TTK, TUBA4A, UBE2G2, WEE1, NLRX1, PIF1, KIF18A, NTPCR, RNGTT, NRP1, C9orf69, DYRK1B, NEK9, AURKB…	395	2200	50793	8.50353e-15	4.62252e-11	2.26594e-13
molecular_function	GO:0032555	purine ribonucleotide binding	55	ARL17B, KIF20A, LOC102724428, CENPE, KIF2C, UBE2C, PLK3, KIF18B, DGKA, AK1, ACSL4, HSPA4L, TPX2, KIF4A, UBE2S, ITPK1, KIF11, KIFC1, KIF22, MKI67, NEK2, AK3, PLK1, SEPT5, ERCC6L, NADSYN1, ATAD3A, KIF15, ADCK3, ACTA2, RAP2B, RRAD, NME1-NME2, AURKA, TAP1, BUB1, BUB1B, TOP2A, TTK, TUBA4A, UBE2G2, WEE1, NLRX1, PIF1, KIF18A, NTPCR, RNGTT, C9orf69, DYRK1B, NEK9, AURKB, KIF23, CDK1, TRANK1, KIF14	401	1843	51150	1.33392e-14	7.25117e-11	3.53716e-13
biological_process	GO:0065003	macromolecular complex assembly	48	ARPC4-TTLL3, ARPC5, C7orf55-LUC7L2, CENPA, UBE2C, COX15, ECT2, STOM, TPX2, KIF4A, LSM4, ASPM, FBXO5, NUPR1, NSG1, UBE2S, ANG, RACGAP1, BIRC5, FAS, KIF11, KIFC1, MDM2, ACHE, NEFL, NEK2, PLK1, PMAIP1, ANLN, MIS18BP1, HJURP, PRKAB1, GOPC, SMN1, AURKA, VAMP2, TUBA4A, EIF3CL, SUMO1, DERL1, PSRC1, EIF3C, CCNB1, TICRR, SLC7A6, AURKB, KIF23, KIF14	408	1431	51562	1.50956e-14	8.20597e-11	3.98348e-13
cellular_component	GO:0000228	nuclear chromosome	28	NDC80, CEBPB, CENPA, E2F1, ZNF385A, UHRF1, H2AFX, HMGB2, BIRC5, INCENP, MCM6, NEK2, PCNA, PLK1, MIS18BP1, MCM10, POLD4, AURKA, BUB1, BUB1B, TOP2A, PIF1, ANP32E, HIST1H2AC, CCNB1, AURKB, CDK1, NCAPD2	428	449	52544	1.55066e-14	8.42941e-11	4.07218e-13
molecular_function	GO:0017076	purine nucleotide binding	55	ARL17B, KIF20A, LOC102724428, CENPE, KIF2C, UBE2C, PLK3, KIF18B, DGKA, AK1, ACSL4, HSPA4L, TPX2, KIF4A, UBE2S, ITPK1, KIF11, KIFC1, KIF22, MKI67, NEK2, AK3, PLK1, SEPT5, ERCC6L, NADSYN1, ATAD3A, KIF15, ADCK3, ACTA2, RAP2B, RRAD, NME1-NME2, AURKA, TAP1, BUB1, BUB1B, TOP2A, TTK, TUBA4A, UBE2G2, WEE1, NLRX1, PIF1, KIF18A, NTPCR, RNGTT, C9orf69, DYRK1B, NEK9, AURKB, KIF23, CDK1, TRANK1, KIF14	401	1852	51141	1.61417e-14	8.77462e-11	4.21857e-13
biological_process	GO:0033043	regulation of organelle organization	40	ARPC4-TTLL3, ARPC5, SPAG5, CENPE, CFL2, UBE2C, E2F1, ECT2, TPX2, PHF19, FBXO5, GPX1, RACGAP1, BIRC5, ARPIN, KIF11, MAD2L1, NEK2, NUSAP1, TRIAP1, PLK1, PMAIP1, ANLN, TIGAR, GRHL3, AURKA, BUB1, BUB1B, TTK, BORA, PIF1, PSRC1, CCNB1, CCNF, KNSTRN, AURKB, PTTG1, ESPL1, CDC20, CDC25C	416	1001	51992	1.80726e-14	9.82427e-11	4.70061e-13
molecular_function	GO:0032553	ribonucleotide binding	55	ARL17B, KIF20A, LOC102724428, CENPE, KIF2C, UBE2C, PLK3, KIF18B, DGKA, AK1, ACSL4, HSPA4L, TPX2, KIF4A, UBE2S, ITPK1, KIF11, KIFC1, KIF22, MKI67, NEK2, AK3, PLK1, SEPT5, ERCC6L, NADSYN1, ATAD3A, KIF15, ADCK3, ACTA2, RAP2B, RRAD, NME1-NME2, AURKA, TAP1, BUB1, BUB1B, TOP2A, TTK, TUBA4A, UBE2G2, WEE1, NLRX1, PIF1, KIF18A, NTPCR, RNGTT, C9orf69, DYRK1B, NEK9, AURKB, KIF23, CDK1, TRANK1, KIF14	401	1859	51134	1.87064e-14	1.01688e-10	4.84228e-13
biological_process	GO:0044085	cellular component biogenesis	64	ARPC4-TTLL3, ARPC5, C7orf55-LUC7L2, CENPA, CFL2, UBE2C, MRPL10, COX15, ECT2, STOM, TPX2, ISCU, CORO1C, FLRT2, KIF4A, LSM4, ASPM, FBXO5, NUPR1, NSG1, UBE2S, ANG, RACGAP1, BIRC5, FAS, KIF11, KIFC1, SMAD7, MDM2, ACHE, NEFL, NEK2, PLK1, PLXNB3, PMAIP1, ANLN, MIS18BP1, HJURP, PRKAB1, GOPC, SHTN1, PEX19, RAP2B, SDF2, EPS8L2, SMN1, AURKA, VAMP2, TUBA4A, EIF3CL, SUMO1, DERL1, PVRL4, PARD6G, PSRC1, EIF3C,…	392	2441	50552	1.91957e-14	1.04348e-10	4.94539e-13
cellular_component	GO:0005876	spindle microtubule	14	SPAG5, KIF18B, KIF4A, BIRC5, KIF11, NUSAP1, PLK1, AURKA, TBL1XR1, KIF18A, PSRC1, PRC1, AURKB, CDK1	442	55	52938	2.13288e-14	1.15944e-10	5.46903e-13
biological_process	GO:0051640	organelle localization	27	NDC80, TACC3, CENPA, SPAG5, CENPE, CENPF, KIF2C, DPYSL2, ASPM, BLOC1S2, GPSM2, BIRC5, KIFC1, KIF22, NUSAP1, SEPT5, SPDL1, CDCA8, CEP55, AURKA, VAMP2, FAM83D, KIF18A, PSRC1, CCNB1, NTN1, KIF14	429	417	52576	2.17138e-14	1.18036e-10	5.54161e-13
biological_process	GO:0000086	G2/M transition of mitotic cell cycle	20	CDKN1A, CENPF, PLK3, GADD45A, BIRC5, NEK2, PLK1, AURKA, TUBA4A, WEE1, BORA, PPM1D, CCNA2, CCNB1, TICRR, CCNB2, CDK1, KIF14, CDC25A, CDC25C	436	186	52807	2.20532e-14	1.19881e-10	5.60192e-13
biological_process	GO:0000075	cell cycle checkpoint	22	CDKN1A, UBE2C, PLK3, E2F1, H2AFX, BIRC5, MAD2L1, MDM2, TRIAP1, PLK1, SPDL1, BUB1, BUB1B, TOP2A, TTK, XPC, CCNA2, CCNB1, TICRR, AURKB, CDK1, CDC20	434	245	52748	2.31031e-14	1.25588e-10	5.84131e-13
biological_process	GO:0022607	cellular component assembly	61	ARPC4-TTLL3, ARPC5, C7orf55-LUC7L2, CENPA, CFL2, UBE2C, COX15, ECT2, STOM, TPX2, ISCU, CORO1C, FLRT2, KIF4A, LSM4, ASPM, FBXO5, NUPR1, NSG1, UBE2S, ANG, RACGAP1, BIRC5, FAS, KIF11, KIFC1, SMAD7, MDM2, ACHE, NEFL, NEK2, PLK1, PLXNB3, PMAIP1, ANLN, MIS18BP1, HJURP, PRKAB1, GOPC, SHTN1, RAP2B, EPS8L2, SMN1, AURKA, VAMP2, TUBA4A, EIF3CL, SUMO1, DERL1, PVRL4, PARD6G, PSRC1, EIF3C, CCNB1, TICRR, SLC7A6…	395	2253	50740	2.33002e-14	1.2666e-10	5.86387e-13
biological_process	GO:0018130	heterocycle biosynthetic process	88	TOB1, CDKN1A, CEBPB, MXD4, CENPF, PNRC1, PLK3, KLF6, COX15, ZFP90, DDIT3, E2F1, E2F2, ELF2, AK1, ZNF385A, PHF19, ZNF337, FBXO5, NUPR1, SESN1, BLOC1S2, ANG, UHRF1, GTF2A1, SERTAD1, H2AFX, HMGB2, HOXA3, HOXC13, BIRC5, IL6, IL11, SMAD7, MDM2, MEF2D, ASPH, ATF3, NFIC, NRF1, RRM2B, AK3, PCNA, ZBTB7A, TRIAP1, PLK1, POLH, HES2, NADSYN1, LGR4, MEG3, MED29, DEPDC1, PRKAB1, RGMA, TIGAR, SFMBT2, ANKRA2, POL…	368	4185	48808	2.49058e-14	1.35388e-10	6.23907e-13
biological_process	GO:0050000	chromosome localization	14	CENPE, CENPF, KIF2C, BIRC5, KIFC1, KIF22, SPDL1, CDCA8, CEP55, FAM83D, KIF18A, PSRC1, CCNB1, KIF14	442	56	52937	2.60786e-14	1.41763e-10	6.4732e-13
biological_process	GO:0051303	establishment of chromosome localization	14	CENPE, CENPF, KIF2C, BIRC5, KIFC1, KIF22, SPDL1, CDCA8, CEP55, FAM83D, KIF18A, PSRC1, CCNB1, KIF14	442	56	52937	2.60786e-14	1.41763e-10	6.4732e-13
biological_process	GO:0043085	positive regulation of catalytic activity	49	TBC1D3G, CDKN1A, CENPE, DBF4, UBE2C, OSBPL8, GADD45A, ECT2, TPX2, CORO1C, FBXO5, CYFIP2, GCLM, UBE2S, ANG, GRIN2C, RACGAP1, UHRF1, HMGB2, ACER2, IGFBP3, FAS, KITLG, ASPH, NEFL, PCNA, PLK1, PMAIP1, DEPDC1, DEPDC1B, DIABLO, TIGAR, GRHL3, RALGDS, RANGAP1, EPS8L2, STIL, TCEA1, SUMO1, PSRC1, ARHGEF39, TNFRSF10B, CCNB1, ARHGAP29, TRAF4, ARHGAP11A, CDK1, CDC20, KIF14	407	1512	51481	2.626e-14	1.42749e-10	6.48861e-13
biological_process	GO:0019438	aromatic compound biosynthetic process	88	TOB1, CDKN1A, CEBPB, MXD4, CENPF, PNRC1, PLK3, KLF6, COX15, ZFP90, DDIT3, E2F1, E2F2, ELF2, AK1, ZNF385A, PHF19, ZNF337, FBXO5, NUPR1, SESN1, BLOC1S2, ANG, UHRF1, GTF2A1, SERTAD1, H2AFX, HMGB2, HOXA3, HOXC13, BIRC5, IL6, IL11, SMAD7, MDM2, MEF2D, ASPH, ATF3, NFIC, NRF1, RRM2B, AK3, PCNA, ZBTB7A, TRIAP1, PLK1, POLH, HES2, NADSYN1, LGR4, MEG3, MED29, DEPDC1, PRKAB1, RGMA, TIGAR, SFMBT2, ANKRA2, POL…	368	4190	48803	2.64695e-14	1.43888e-10	6.51078e-13
biological_process	GO:0006468	protein phosphorylation	53	CDKN1A, LOC102724428, CDKN2C, CDKN3, CENPE, OSBPL8, PLK3, GADD45A, ECT2, TPX2, CORO1C, PLXNB2, FYB, ANG, GRIN2C, SERTAD1, BIRC5, IGFBP3, IL6, IL11, INHBB, SMAD7, KITLG, ATF3, NEFL, NEK2, PLK1, PRKAB1, RAP2B, EDA2R, STIL, AURKA, BUB1, BUB1B, TTK, WEE1, SH3BP5L, FAM83D, SESN2, PSRC1, NRP1, CCNA2, CCNB1, CCNG1, DYRK1B, NEK9, AURKB, GDF15, TRAF4, CDK1, KIF14, CDC25A, CDC25C	403	1753	51240	2.70097e-14	1.46825e-10	6.61373e-13
biological_process	GO:0009892	negative regulation of metabolic process	65	TOB1, CDKN1A, CDKN2C, CEBPB, MXD4, CENPF, UBE2C, CYGB, PLK3, ZFP90, GADD45A, DDIT3, E2F1, ELF2, CORO1C, PHF19, FBXO5, ANG, GPX1, GRIN2C, UHRF1, H2AFX, HMGB2, BIRC5, ACER2, IGFBP3, FAS, IL6, INHBB, MAD2L1, SMAD7, MDM2, ATF3, NFIC, ZBTB7A, TRIAP1, SERPINF1, PLK1, PLXNB3, HES2, LGR4, MEG3, DEPDC1, TIGAR, SFMBT2, BUB1, BUB1B, TTK, UBE2G2, SUMO1, BTG2, CHAC1, TBL1XR1, E2F8, PIF1, SH3BP5L, ANP32E, HIST…	391	2532	50461	2.91891e-14	1.58672e-10	7.11534e-13
biological_process	GO:0034654	nucleobase-containing compound biosynthetic process	87	TOB1, CDKN1A, CEBPB, MXD4, CENPF, PNRC1, PLK3, KLF6, ZFP90, DDIT3, E2F1, E2F2, ELF2, AK1, ZNF385A, PHF19, ZNF337, FBXO5, NUPR1, SESN1, BLOC1S2, ANG, UHRF1, GTF2A1, SERTAD1, H2AFX, HMGB2, HOXA3, HOXC13, BIRC5, IL6, IL11, SMAD7, MDM2, MEF2D, ASPH, ATF3, NFIC, NRF1, RRM2B, AK3, PCNA, ZBTB7A, TRIAP1, PLK1, POLH, HES2, NADSYN1, LGR4, MEG3, MED29, DEPDC1, PRKAB1, RGMA, TIGAR, SFMBT2, ANKRA2, POLD4, GRH…	369	4120	48873	2.9823e-14	1.62118e-10	7.23741e-13
biological_process	GO:0048869	cellular developmental process	85	PTPRU, ARPC5, TOB1, CDKN1A, CDKN2C, TACC3, CEBPB, DPYSL4, CENPF, CFL2, ADAMTS7, OSBPL8, RTN4RL1, DDIT3, DPYSL2, E2F1, ECT2, ELF2, ACSL4, CORO1C, PLXNB2, FLRT2, KIF4A, ASPM, ZNF385A, PHF19, FBXO22, FBXO5, NUPR1, BLOC1S2, GPX1, GRIN2C, C1GALT1C1, RACGAP1, GPSM2, HMGB2, ARPIN, IGFBP3, FAS, IL6, INHBB, SMAD7, MEF2D, KITLG, ACHE, ATF3, NEFL, PCNA, ZBTB7A, SERPINF1, PGF, PLXNB3, ANLN, GPATCH4, LGR4, ME…	371	3944	49049	3.08148e-14	1.67509e-10	7.44485e-13
biological_process	GO:0044839	cell cycle G2/M phase transition	20	CDKN1A, CENPF, PLK3, GADD45A, BIRC5, NEK2, PLK1, AURKA, TUBA4A, WEE1, BORA, PPM1D, CCNA2, CCNB1, TICRR, CCNB2, CDK1, KIF14, CDC25A, CDC25C	436	190	52803	3.139e-14	1.70636e-10	7.55028e-13
biological_process	GO:0051656	establishment of organelle localization	24	NDC80, CENPA, SPAG5, CENPE, CENPF, KIF2C, DPYSL2, BLOC1S2, GPSM2, BIRC5, KIFC1, KIF22, NUSAP1, SEPT5, SPDL1, CDCA8, CEP55, VAMP2, FAM83D, KIF18A, PSRC1, CCNB1, NTN1, KIF14	432	317	52676	3.61186e-14	1.96341e-10	8.64938e-13
molecular_function	GO:0036094	small molecule binding	66	ARL17B, KIF20A, LOC102724428, CENPE, KIF2C, UBE2C, OSBPL8, PLK3, HNRNPA1L2, KIF18B, DGKA, AK1, ACSL4, FDXR, HSPA4L, TPX2, KIF4A, UBE2S, UHRF1, ITPK1, KIF11, KIFC1, KIF22, MKI67, NEK2, AK3, PLK1, SEPT5, ERCC6L, NADSYN1, ATAD3A, TMEM63B, PRODH, CYP26B1, KIF15, ADCK3, ACTA2, RAP2B, RRAD, SCP2, NME1-NME2, AURKA, TAP1, BUB1, BUB1B, TOP2A, TTK, TUBA4A, UBE2G2, WEE1, NLRX1, PIF1, KIF18A, NTPCR, RNGTT, C…	390	2615	50378	3.77522e-14	2.05221e-10	9.00092e-13
biological_process	GO:0044093	positive regulation of molecular function	53	TBC1D3G, CDKN1A, CENPE, DBF4, UBE2C, OSBPL8, GADD45A, ECT2, TPX2, CORO1C, FBXO5, CYFIP2, GCLM, UBE2S, ANG, GRIN2C, RACGAP1, UHRF1, HMGB2, ACER2, IGFBP3, FAS, IL6, KITLG, ASPH, NEFL, PCNA, PLK1, PMAIP1, DEPDC1, DEPDC1B, DIABLO, TIGAR, GRHL3, RALGDS, RANGAP1, EDA2R, EPS8L2, STIL, TCEA1, SUMO1, DERL1, PSRC1, ARHGEF39, TNFRSF10B, NRP1, CCNB1, ARHGAP29, TRAF4, ARHGAP11A, CDK1, CDC20, KIF14	403	1773	51220	4.1462e-14	2.25387e-10	9.84223e-13
molecular_function	GO:0005524	ATP binding	48	KIF20A, LOC102724428, CENPE, KIF2C, UBE2C, PLK3, KIF18B, DGKA, AK1, ACSL4, HSPA4L, TPX2, KIF4A, UBE2S, ITPK1, KIF11, KIFC1, KIF22, MKI67, NEK2, AK3, PLK1, ERCC6L, NADSYN1, ATAD3A, KIF15, ADCK3, ACTA2, NME1-NME2, AURKA, TAP1, BUB1, BUB1B, TOP2A, TTK, UBE2G2, WEE1, NLRX1, PIF1, KIF18A, NTPCR, DYRK1B, NEK9, AURKB, KIF23, CDK1, TRANK1, KIF14	408	1473	51520	4.16806e-14	2.26576e-10	9.85113e-13
biological_process	GO:0023051	regulation of signaling	69	TOB1, OSBPL8, MIB2, GADD45A, DDIT3, E2F1, ECT2, VWCE, PHLDA3, ASPM, ZNF385A, NSG1, SESN1, GCLM, GPX1, GRIN2C, RACGAP1, HMGB2, BIRC5, IGFBP3, FAS, IL6, IL11, INHBB, SMAD7, MDM2, KITLG, ACHE, ASPH, ATF3, NEFL, RRM2B, RDH11, TRIAP1, PMAIP1, SEPT5, LGR4, MEG3, G2E3, DEPDC1B, SULF2, CYP26B1, TMEM9B, RGMA, EDA2R, SDF2, EPS8L2, VAMP2, BUB1, TTK, SUMO1, UCP2, CHAC1, NLRX1, FAM83D, NETO2, ARHGEF39, NKD2, …	387	2855	50138	6.40576e-14	3.48217e-10	1.50743e-12
biological_process	GO:0048513	organ development	71	PTPRU, CDKN1A, TACC3, CEBPB, CENPF, ADAMTS7, CRIP2, DPYSL2, E2F1, CORO1C, PLXNB2, ASPM, GAMT, ZNF385A, FBXO22, NUPR1, GPX1, GPSM2, H2AFX, HMGB2, HOXA3, HOXC13, FAS, IL6, SMAD7, MEF2D, KITLG, MKI67, ACHE, ATF3, NEFL, NFIC, NINJ1, NRF1, RRM2B, PCNA, ZBTB7A, SERPINF1, PGF, ANLN, GPATCH4, LGR4, MEG3, SULF2, CYP26B1, GRHL3, ACTA2, CREB3L2, CCDC14, STIL, TCEA1, TOP2A, TPM3, UCP2, ZFAND5, BTG2, E2F8, FA…	385	3000	49993	6.78437e-14	3.68798e-10	1.58965e-12
biological_process	GO:0070727	cellular macromolecule localization	48	C15orf38-AP3S2, PTPRU, TOB1, CDKN1A, TACC3, CENPA, SPAG5, OSBPL8, PLK3, E2F1, ECT2, STOM, ARL6IP1, ASTN2, FYB, ZNF385A, RACGAP1, IL6, KPNA2, SMAD7, MDM2, ASPH, NEK2, ZDHHC9, PLK1, PMAIP1, VPS13C, SPDL1, SPATA7, PEX19, RANGAP1, SCP2, STIL, SSR3, AURKA, VAMP2, TAP1, BUB1B, UBE2G2, SUMO1, DERL1, FAM83D, NKD2, NRP1, CCNB1, KNSTRN, AURKB, CDK1	408	1498	51495	7.49476e-14	4.07415e-10	1.74856e-12
biological_process	GO:0051310	metaphase plate congression	13	CENPE, CENPF, KIF2C, KIFC1, KIF22, SPDL1, CDCA8, CEP55, FAM83D, KIF18A, PSRC1, CCNB1, KIF14	443	46	52947	7.84983e-14	4.26717e-10	1.82358e-12
molecular_function	GO:0032559	adenyl ribonucleotide binding	48	KIF20A, LOC102724428, CENPE, KIF2C, UBE2C, PLK3, KIF18B, DGKA, AK1, ACSL4, HSPA4L, TPX2, KIF4A, UBE2S, ITPK1, KIF11, KIFC1, KIF22, MKI67, NEK2, AK3, PLK1, ERCC6L, NADSYN1, ATAD3A, KIF15, ADCK3, ACTA2, NME1-NME2, AURKA, TAP1, BUB1, BUB1B, TOP2A, TTK, UBE2G2, WEE1, NLRX1, PIF1, KIF18A, NTPCR, DYRK1B, NEK9, AURKB, KIF23, CDK1, TRANK1, KIF14	408	1506	51487	9.01828e-14	4.90233e-10	2.0861e-12
biological_process	GO:0097659	nucleic acid-templated transcription	79	TOB1, CEBPB, MXD4, CENPF, PNRC1, PLK3, KLF6, ZFP90, DDIT3, E2F1, E2F2, ELF2, ZNF385A, PHF19, ZNF337, FBXO5, NUPR1, SESN1, BLOC1S2, ANG, UHRF1, GTF2A1, SERTAD1, H2AFX, HMGB2, HOXA3, HOXC13, BIRC5, IL6, IL11, SMAD7, MDM2, MEF2D, ASPH, ATF3, NFIC, NRF1, RRM2B, PCNA, ZBTB7A, TRIAP1, PLK1, HES2, LGR4, MEG3, MED29, DEPDC1, PRKAB1, RGMA, TIGAR, SFMBT2, ANKRA2, GRHL3, EDA2R, CREB3L2, TCEA1, ZNF354A, TOP2…	377	3602	49391	9.65689e-14	5.24948e-10	2.22436e-12
biological_process	GO:0010468	regulation of gene expression	85	TOB1, CDKN1A, CEBPB, MXD4, CENPF, PNRC1, PLK3, KLF6, ZFP90, DDIT3, E2F1, E2F2, ELF2, ZNF385A, PHF19, ZNF337, FBXO5, NUPR1, APOBEC3C, BLOC1S2, ANG, GPX1, UHRF1, GTF2A1, SERTAD1, H2AFX, HMGB2, HOXA3, HOXC13, BIRC5, IL6, IL11, SMAD7, MDM2, MEF2D, ASPH, ATF3, NFIC, NRF1, PCNA, ZBTB7A, TRIAP1, SERPINF1, PLK1, HES2, LGR4, MEG3, MED29, DEPDC1, PRKAB1, CYP26B1, RGMA, SFMBT2, ANKRA2, GRHL3, ACTA2, EDA2R, …	371	4063	48930	1.01967e-13	5.54291e-10	2.33878e-12
molecular_function	GO:0030554	adenyl nucleotide binding	48	KIF20A, LOC102724428, CENPE, KIF2C, UBE2C, PLK3, KIF18B, DGKA, AK1, ACSL4, HSPA4L, TPX2, KIF4A, UBE2S, ITPK1, KIF11, KIFC1, KIF22, MKI67, NEK2, AK3, PLK1, ERCC6L, NADSYN1, ATAD3A, KIF15, ADCK3, ACTA2, NME1-NME2, AURKA, TAP1, BUB1, BUB1B, TOP2A, TTK, UBE2G2, WEE1, NLRX1, PIF1, KIF18A, NTPCR, DYRK1B, NEK9, AURKB, KIF23, CDK1, TRANK1, KIF14	408	1514	51479	1.08375e-13	5.89125e-10	2.47532e-12
molecular_function	GO:0015631	tubulin binding	22	KIF20A, CENPE, KIF2C, KIF18B, DPYSL2, KIF4A, BLOC1S2, GAS2L3, RACGAP1, BIRC5, KIF11, KIFC1, KIF22, NUSAP1, PLK1, KIF15, FAM83D, KIF18A, PSRC1, PRC1, KIF23, KIF14	434	267	52726	1.10048e-13	5.9822e-10	2.50301e-12
biological_process	GO:0030162	regulation of proteolysis	34	CENPE, UBE2C, PLK3, RNF19B, RNF19A, FBXO22, FBXO5, CYFIP2, GPX1, BIRC5, ACER2, FAS, IL6, MAD2L1, SMAD7, MDM2, ASPH, TRIAP1, SERPINF1, PLK1, PMAIP1, DIABLO, AURKA, BUB1, BUB1B, TTK, SUMO1, CHAC1, NKD2, TNFRSF10B, CCNB1, PTTG1, CDK1, CDC20	422	762	52231	1.26983e-13	6.90278e-10	2.87616e-12
biological_process	GO:0010646	regulation of cell communication	69	TOB1, OSBPL8, MIB2, GADD45A, DDIT3, E2F1, ECT2, VWCE, PHLDA3, ASPM, ZNF385A, SESN1, GCLM, GPX1, GRIN2C, RACGAP1, HMGB2, BIRC5, IGFBP3, FAS, IL6, IL11, INHBB, SMAD7, MDM2, KITLG, ACHE, ASPH, ATF3, NEFL, RRM2B, RDH11, TRIAP1, PMAIP1, SEPT5, LGR4, MEG3, G2E3, DEPDC1B, SULF2, CYP26B1, TMEM9B, RGMA, TIGAR, EDA2R, SDF2, EPS8L2, VAMP2, BUB1, TTK, SUMO1, UCP2, CHAC1, NLRX1, FAM83D, NETO2, ARHGEF39, NKD2,…	387	2902	50091	1.34757e-13	7.32541e-10	3.03959e-12
biological_process	GO:0006461	protein complex assembly	42	ARPC4-TTLL3, ARPC5, CENPA, UBE2C, COX15, ECT2, STOM, TPX2, KIF4A, ASPM, FBXO5, NUPR1, NSG1, UBE2S, ANG, RACGAP1, BIRC5, FAS, KIF11, KIFC1, MDM2, ACHE, NEFL, NEK2, PLK1, PMAIP1, ANLN, MIS18BP1, HJURP, PRKAB1, GOPC, AURKA, VAMP2, TUBA4A, SUMO1, DERL1, PSRC1, CCNB1, SLC7A6, AURKB, KIF23, KIF14	414	1188	51805	1.72562e-13	9.3805e-10	3.86029e-12
biological_process	GO:0070271	protein complex biogenesis	42	ARPC4-TTLL3, ARPC5, CENPA, UBE2C, COX15, ECT2, STOM, TPX2, KIF4A, ASPM, FBXO5, NUPR1, NSG1, UBE2S, ANG, RACGAP1, BIRC5, FAS, KIF11, KIFC1, MDM2, ACHE, NEFL, NEK2, PLK1, PMAIP1, ANLN, MIS18BP1, HJURP, PRKAB1, GOPC, AURKA, VAMP2, TUBA4A, SUMO1, DERL1, PSRC1, CCNB1, SLC7A6, AURKB, KIF23, KIF14	414	1188	51805	1.72562e-13	9.3805e-10	3.86029e-12
biological_process	GO:0032434	regulation of proteasomal ubiquitin-dependent protein catabolic process	18	CENPE, UBE2C, PLK3, RNF19B, RNF19A, FBXO22, MAD2L1, SMAD7, MDM2, PLK1, AURKA, BUB1, BUB1B, TTK, SUMO1, NKD2, CCNB1, CDC20	438	155	52838	1.80363e-13	9.80452e-10	4.01824e-12
biological_process	GO:0031145	anaphase-promoting complex-dependent proteasomal ubiquitin-dependent protein catabolic process	16	CENPE, UBE2C, FBXO5, UBE2S, MAD2L1, NEK2, PLK1, AURKA, BUB1, BUB1B, TTK, CCNB1, AURKB, PTTG1, CDK1, CDC20	440	107	52886	1.90654e-13	1.03639e-09	4.2186e-12
biological_process	GO:0016070	RNA metabolic process	89	C7orf55-LUC7L2, TOB1, CEBPB, MXD4, CENPF, PNRC1, PLK3, KLF6, HNRNPA1L2, ZFP90, DDIT3, E2F1, E2F2, DCP1B, ELF2, LSM4, ZNF385A, PHF19, ZNF337, FBXO5, NUPR1, SESN1, BLOC1S2, ANG, UHRF1, GTF2A1, SERTAD1, H2AFX, HMGB2, HOXA3, HOXC13, BIRC5, IL6, IL11, SMAD7, MDM2, MEF2D, ASPH, ATF3, NFIC, NRF1, RRM2B, PCNA, ZBTB7A, TRIAP1, PLK1, HES2, LGR4, MEG3, MED29, ZCCHC8, DEPDC1, PRKAB1, RGMA, TIGAR, SFMBT2, ANK…	367	4401	48592	1.90908e-13	1.03778e-09	4.2186e-12
biological_process	GO:0006928	movement of cell or subcellular component	53	PTPRU, ARPC5, KIF20A, DPYSL4, CENPE, KIF2C, CYGB, OSBPL8, KIF18B, DPYSL2, CORO1C, PLXNB2, FLRT2, KIF4A, ASPM, BLOC1S2, ANG, GPX1, GRIN2C, RACGAP1, HMGB2, ARPIN, IGFBP3, IL6, KIF11, KIFC1, KIF22, SMAD7, KITLG, NEFL, SERPINF1, PLXNB3, ANLN, MEG3, DEPDC1B, RGMA, KIF15, SHTN1, RAP2B, TPM3, SUMO1, ZFAND5, FAM83D, KIF18A, ARHGEF39, KLF7, NRP1, SLC7A6, NTN1, TP53INP1, KIF23, CDK1, KIF14	403	1849	51144	1.99453e-13	1.08423e-09	4.38958e-12
biological_process	GO:0006351	transcription, DNA-templated	78	CEBPB, MXD4, CENPF, PNRC1, PLK3, KLF6, ZFP90, DDIT3, E2F1, E2F2, ELF2, ZNF385A, PHF19, ZNF337, FBXO5, NUPR1, SESN1, BLOC1S2, ANG, UHRF1, GTF2A1, SERTAD1, H2AFX, HMGB2, HOXA3, HOXC13, BIRC5, IL6, IL11, SMAD7, MDM2, MEF2D, ASPH, ATF3, NFIC, NRF1, RRM2B, PCNA, ZBTB7A, TRIAP1, PLK1, HES2, LGR4, MEG3, MED29, DEPDC1, PRKAB1, RGMA, TIGAR, SFMBT2, ANKRA2, GRHL3, EDA2R, CREB3L2, TCEA1, ZNF354A, TOP2A, SUM…	378	3586	49407	2.10537e-13	1.14448e-09	4.61483e-12
biological_process	GO:0009966	regulation of signal transduction	63	TOB1, OSBPL8, MIB2, GADD45A, DDIT3, E2F1, ECT2, VWCE, PHLDA3, ASPM, ZNF385A, SESN1, GCLM, GPX1, GRIN2C, RACGAP1, HMGB2, BIRC5, IGFBP3, FAS, IL6, IL11, INHBB, SMAD7, MDM2, KITLG, ASPH, ATF3, NEFL, RRM2B, RDH11, TRIAP1, PMAIP1, LGR4, MEG3, G2E3, DEPDC1B, SULF2, CYP26B1, TMEM9B, RGMA, EDA2R, SDF2, EPS8L2, BUB1, TTK, SUMO1, CHAC1, NLRX1, FAM83D, NETO2, ARHGEF39, NKD2, TNFRSF10B, NRP1, ARHGAP11B, ARHG…	393	2519	50474	2.39844e-13	1.30379e-09	5.23612e-12
biological_process	GO:0034613	cellular protein localization	47	C15orf38-AP3S2, PTPRU, TOB1, CDKN1A, TACC3, CENPA, SPAG5, OSBPL8, PLK3, E2F1, ECT2, STOM, ARL6IP1, ASTN2, FYB, RACGAP1, IL6, KPNA2, SMAD7, MDM2, ASPH, NEK2, ZDHHC9, PLK1, PMAIP1, VPS13C, SPDL1, SPATA7, PEX19, RANGAP1, SCP2, STIL, SSR3, AURKA, VAMP2, TAP1, BUB1B, UBE2G2, SUMO1, DERL1, FAM83D, NKD2, NRP1, CCNB1, KNSTRN, AURKB, CDK1	409	1491	51502	2.48856e-13	1.35278e-09	5.41113e-12
biological_process	GO:0031324	negative regulation of cellular metabolic process	59	TOB1, CDKN1A, CDKN2C, CEBPB, MXD4, CENPF, UBE2C, PLK3, ZFP90, GADD45A, DDIT3, E2F1, ELF2, CORO1C, PHF19, FBXO5, ANG, GPX1, UHRF1, H2AFX, HMGB2, BIRC5, ACER2, IGFBP3, FAS, IL6, INHBB, MAD2L1, SMAD7, MDM2, ATF3, NFIC, ZBTB7A, TRIAP1, SERPINF1, PLK1, HES2, LGR4, MEG3, DEPDC1, TIGAR, BUB1, BUB1B, TTK, SUMO1, BTG2, CHAC1, TBL1XR1, E2F8, PIF1, SH3BP5L, HIST1H2AC, MXD3, TNFRSF10B, CCNB1, AURKB, PTTG1, C…	397	2266	50727	3.28136e-13	1.78375e-09	7.10656e-12
biological_process	GO:0010556	regulation of macromolecule biosynthetic process	81	TOB1, CDKN1A, CEBPB, MXD4, CENPF, PNRC1, CYGB, PLK3, KLF6, ZFP90, DDIT3, E2F1, E2F2, ELF2, ZNF385A, PHF19, ZNF337, FBXO5, NUPR1, BLOC1S2, ANG, UHRF1, GTF2A1, SERTAD1, H2AFX, HMGB2, HOXA3, HOXC13, BIRC5, ACER2, IL6, IL11, INHBB, SMAD7, MDM2, MEF2D, KITLG, ASPH, ATF3, NFIC, NRF1, PCNA, ZBTB7A, TRIAP1, PLK1, HES2, LGR4, MEG3, MED29, DEPDC1, RGMA, SFMBT2, ANKRA2, GRHL3, EDA2R, CREB3L2, TCEA1, ZNF354A…	375	3844	49149	3.3557e-13	1.82416e-09	7.23873e-12
biological_process	GO:1902578	single-organism localization	83	ARPC5, TOB1, CDKN1A, NDC80, TACC3, CENPA, SPAG5, TGOLN2, CENPE, KIF2C, CYGB, OSBPL8, RNF19B, COX15, DDIT3, DPYSL2, E2F1, ECT2, STOM, ACSL4, ARL6IP1, CORO1C, KIF4A, FYB, ASPM, CYFIP2, NSG1, SLCO4A1, BLOC1S2, ANG, GRIN2C, RACGAP1, GPSM2, BIRC5, IL6, IL11, INHBB, KIFC1, KIF22, KPNA2, ACHE, ASPH, NEFL, ZDHHC9, NUSAP1, TRIAP1, PMAIP1, SEPT5, VPS13C, SPDL1, SLC52A1, CDCA8, CEP55, TMEM63B, LGR4, MEG3, P…	373	4014	48979	4.95797e-13	2.69515e-09	1.06528e-11
biological_process	GO:0097190	apoptotic signaling pathway	30	CDKN1A, CEBPB, DDIT3, E2F1, E2F2, ECT2, PHLDA3, ZNF385A, NUPR1, GCLM, BLOC1S2, GPX1, CDIP1, HMGB2, FAS, INHBB, KITLG, ATF3, RRM2B, TRIAP1, PMAIP1, G2E3, DIABLO, EDA2R, BUB1, CHAC1, TNFRSF10B, NRP1, TP53INP1, CD70	426	614	52379	5.29654e-13	2.8792e-09	1.13354e-11
biological_process	GO:0032774	RNA biosynthetic process	79	TOB1, CEBPB, MXD4, CENPF, PNRC1, PLK3, KLF6, ZFP90, DDIT3, E2F1, E2F2, ELF2, ZNF385A, PHF19, ZNF337, FBXO5, NUPR1, SESN1, BLOC1S2, ANG, UHRF1, GTF2A1, SERTAD1, H2AFX, HMGB2, HOXA3, HOXC13, BIRC5, IL6, IL11, SMAD7, MDM2, MEF2D, ASPH, ATF3, NFIC, NRF1, RRM2B, PCNA, ZBTB7A, TRIAP1, PLK1, HES2, LGR4, MEG3, MED29, DEPDC1, PRKAB1, RGMA, TIGAR, SFMBT2, ANKRA2, GRHL3, EDA2R, CREB3L2, TCEA1, ZNF354A, TOP2…	377	3724	49269	5.53487e-13	3.00876e-09	1.1799e-11
cellular_component	GO:0005875	microtubule associated complex	17	KIF20A, CENPE, KIF2C, KIF18B, KIF4A, BIRC5, KIF11, KIFC1, KIF22, CDCA8, KIF15, SHTN1, AURKA, KIF18A, AURKB, KIF23, KIF14	439	142	52851	6.3785e-13	3.46736e-09	1.35444e-11
biological_process	GO:2000112	regulation of cellular macromolecule biosynthetic process	79	TOB1, CDKN1A, CEBPB, MXD4, CENPF, PNRC1, PLK3, KLF6, ZFP90, DDIT3, E2F1, E2F2, ELF2, ZNF385A, PHF19, ZNF337, FBXO5, NUPR1, BLOC1S2, ANG, UHRF1, GTF2A1, SERTAD1, H2AFX, HMGB2, HOXA3, HOXC13, BIRC5, ACER2, IL6, IL11, SMAD7, MDM2, MEF2D, KITLG, ASPH, ATF3, NFIC, NRF1, PCNA, ZBTB7A, TRIAP1, PLK1, HES2, LGR4, MEG3, MED29, DEPDC1, RGMA, SFMBT2, ANKRA2, GRHL3, EDA2R, CREB3L2, TCEA1, ZNF354A, TOP2A, EIF3…	377	3740	49253	6.53715e-13	3.5536e-09	1.38272e-11
cellular_component	GO:0044454	nuclear chromosome part	25	NDC80, CEBPB, CENPA, E2F1, ZNF385A, UHRF1, H2AFX, HMGB2, INCENP, MCM6, PCNA, PLK1, MIS18BP1, MCM10, POLD4, AURKA, BUB1, BUB1B, PIF1, ANP32E, HIST1H2AC, CCNB1, AURKB, CDK1, NCAPD2	431	413	52580	9.11525e-13	4.95505e-09	1.92056e-11
biological_process	GO:0019219	regulation of nucleobase-containing compound metabolic process	80	TOB1, CDKN1A, CEBPB, MXD4, CENPF, PNRC1, PLK3, KLF6, ZFP90, DDIT3, E2F1, E2F2, ELF2, ZNF385A, PHF19, ZNF337, FBXO5, NUPR1, BLOC1S2, UHRF1, GTF2A1, SERTAD1, H2AFX, HMGB2, HOXA3, HOXC13, BIRC5, IL6, IL11, KPNA2, SMAD7, MDM2, MEF2D, KITLG, ASPH, ATF3, NFIC, NRF1, PCNA, ZBTB7A, TRIAP1, PLK1, POLH, HES2, LGR4, MEG3, MED29, DEPDC1, RGMA, TIGAR, SFMBT2, ANKRA2, GRHL3, EDA2R, CREB3L2, TCEA1, ZNF354A, TOP…	376	3853	49140	1.41421e-12	7.68763e-09	2.9682e-11
molecular_function	GO:0008092	cytoskeletal protein binding	33	ARPC5, KIF20A, CENPE, CFL2, KIF2C, MIB2, KIF18B, DPYSL2, CORO1C, KIF4A, BLOC1S2, ANG, GAS2L3, RACGAP1, BIRC5, KIF11, KIFC1, KIF22, NUSAP1, PLK1, ANLN, KIF15, SHTN1, EPS8L2, VAMP2, TPM3, FAM83D, KIF18A, PSRC1, PRC1, KIF23, MICAL2, KIF14	423	788	52205	1.54525e-12	8.39996e-09	3.23075e-11
biological_process	GO:0010948	negative regulation of cell cycle process	20	CDKN1A, UBE2C, PLK3, FBXO5, MAD2L1, MDM2, TRIAP1, PLK1, BUB1, BUB1B, TTK, E2F8, CCNA2, CCNB1, CCNF, TICRR, AURKB, PTTG1, CDK1, CDC20	436	243	52750	1.81415e-12	9.8617e-09	3.77843e-11
biological_process	GO:0051171	regulation of nitrogen compound metabolic process	83	TOB1, CDKN1A, CEBPB, MXD4, CENPF, PNRC1, PLK3, KLF6, ZFP90, DDIT3, E2F1, E2F2, ELF2, ZNF385A, PHF19, ZNF337, FBXO5, NUPR1, BLOC1S2, ANG, UHRF1, GTF2A1, SERTAD1, H2AFX, HMGB2, HOXA3, HOXC13, BIRC5, IL6, IL11, KPNA2, SMAD7, MDM2, MEF2D, KITLG, ASPH, ATF3, NFIC, NRF1, PCNA, ZBTB7A, TRIAP1, PLK1, POLH, HES2, LGR4, MEG3, MED29, DEPDC1, RGMA, TIGAR, SFMBT2, ANKRA2, GRHL3, EDA2R, CREB3L2, TCEA1, ZNF354A…	373	4133	48860	2.22558e-12	1.20983e-08	4.61766e-11
cellular_component	GO:0005813	centrosome	26	TACC3, PLK3, CKAP2L, RNF19A, BLOC1S2, BIRC5, NEK2, PCNA, PLK1, ERCC6L, CEP55, KIF15, NCAPG, CCDC14, STIL, AURKA, TOP2A, CCNB1, CCNF, CCNB2, AURKB, KIF23, ESPL1, DLGAP5, CDK1, CDC20	430	474	52519	2.27926e-12	1.239e-08	4.71104e-11
biological_process	GO:0042325	regulation of phosphorylation	44	CDKN1A, CDKN2C, CDKN3, CENPE, UBE2C, OSBPL8, GADD45A, ECT2, TPX2, CORO1C, PLXNB2, ANG, GRIN2C, SERTAD1, IGFBP3, IL6, IL11, INHBB, SMAD7, KITLG, ATF3, NEFL, PLK1, PRKAB1, TIGAR, RAP2B, EDA2R, STIL, TTK, SH3BP5L, FAM83D, SESN2, BTBD10, PSRC1, NRP1, CCNA2, CCNB1, CCNG1, GDF15, TRAF4, CDK1, KIF14, CDC25A, CDC25C	412	1412	51581	2.36903e-12	1.28781e-08	4.87806e-11
biological_process	GO:0009889	regulation of biosynthetic process	82	TOB1, CDKN1A, CEBPB, MXD4, CENPF, PNRC1, CYGB, PLK3, KLF6, ZFP90, DDIT3, E2F1, E2F2, ELF2, ZNF385A, PHF19, ZNF337, FBXO5, NUPR1, BLOC1S2, ANG, UHRF1, GTF2A1, SERTAD1, H2AFX, HMGB2, HOXA3, HOXC13, BIRC5, ACER2, IL6, IL11, INHBB, SMAD7, MDM2, MEF2D, KITLG, ASPH, ATF3, NFIC, NRF1, PCNA, ZBTB7A, TRIAP1, PLK1, HES2, LGR4, MEG3, MED29, DEPDC1, RGMA, SFMBT2, ANKRA2, GRHL3, EDA2R, CREB3L2, TCEA1, ZNF354A…	374	4070	48923	2.96407e-12	1.61127e-08	6.08025e-11
molecular_function	GO:0019900	kinase binding	28	KIF20A, TOB1, CDKN2C, CEBPB, DPYSL2, E2F1, TPX2, FBXO5, RACGAP1, FAS, KIF11, PCNA, PLK1, PRKAB1, ACTA2, AURKA, TOP2A, BORA, FAM83D, PPM1D, CCNA2, CCNB1, PRC1, NEK9, TRAF4, KIF14, CDC25A, CDC25C	428	569	52424	3.07579e-12	1.672e-08	6.28571e-11
biological_process	GO:0010033	response to organic substance	65	PLA2G4B, PTPRU, TOB1, CDKN1A, CEBPB, ADAMTS7, OSBPL8, KLF6, DDIT3, DPYSL2, E2F1, ECT2, ALDH3A1, ACSL4, HSPA4L, ANG, GPX1, GRIN2C, CDIP1, HMGB2, BIRC5, ACER2, FAS, IL6, INHBB, KPNA2, SMAD7, MDM2, KITLG, MKI67, ASPH, ATF3, NEFL, NRF1, PCNA, SERPINF1, PGF, PMAIP1, MEG3, PRKAB1, SULF2, CYP26B1, RGMA, RALGDS, RANGAP1, EDA2R, SDF2, CREB3L2, SNRPN, AURKA, VAMP2, UBE2G2, SUMO1, UCP2, BTG2, CHAC1, DERL1, …	391	2837	50156	3.86629e-12	2.10172e-08	7.87159e-11
biological_process	GO:0031326	regulation of cellular biosynthetic process	81	TOB1, CDKN1A, CEBPB, MXD4, CENPF, PNRC1, PLK3, KLF6, ZFP90, DDIT3, E2F1, E2F2, ELF2, ZNF385A, PHF19, ZNF337, FBXO5, NUPR1, BLOC1S2, ANG, UHRF1, GTF2A1, SERTAD1, H2AFX, HMGB2, HOXA3, HOXC13, BIRC5, ACER2, IL6, IL11, INHBB, SMAD7, MDM2, MEF2D, KITLG, ASPH, ATF3, NFIC, NRF1, PCNA, ZBTB7A, TRIAP1, PLK1, HES2, LGR4, MEG3, MED29, DEPDC1, RGMA, SFMBT2, ANKRA2, GRHL3, EDA2R, CREB3L2, TCEA1, ZNF354A, TOP2…	375	4028	48965	4.50868e-12	2.45092e-08	9.14523e-11
biological_process	GO:0001932	regulation of protein phosphorylation	42	CDKN1A, CDKN2C, CDKN3, CENPE, UBE2C, OSBPL8, GADD45A, ECT2, TPX2, CORO1C, PLXNB2, ANG, GRIN2C, SERTAD1, IGFBP3, IL6, IL11, INHBB, SMAD7, KITLG, ATF3, NEFL, PLK1, PRKAB1, RAP2B, EDA2R, STIL, TTK, SH3BP5L, FAM83D, SESN2, PSRC1, NRP1, CCNA2, CCNB1, CCNG1, GDF15, TRAF4, CDK1, KIF14, CDC25A, CDC25C	414	1323	51670	4.67147e-12	2.53941e-08	9.44018e-11
biological_process	GO:1902580	single-organism cellular localization	40	TOB1, CDKN1A, NDC80, TACC3, CENPA, SPAG5, CENPE, KIF2C, OSBPL8, DPYSL2, E2F1, ECT2, STOM, ARL6IP1, FYB, ASPM, BLOC1S2, GPSM2, IL6, KIFC1, KIF22, KPNA2, ZDHHC9, NUSAP1, PMAIP1, SEPT5, VPS13C, SPDL1, CDCA8, CEP55, PEX19, SCP2, SSR3, VAMP2, SUMO1, KIF18A, PSRC1, NKD2, CCNB1, KIF14	416	1209	51784	5.00995e-12	2.72341e-08	1.00867e-10
biological_process	GO:0007080	mitotic metaphase plate congression	11	CENPE, KIF2C, KIFC1, KIF22, SPDL1, CDCA8, CEP55, KIF18A, PSRC1, CCNB1, KIF14	445	36	52957	5.61657e-12	3.05317e-08	1.12663e-10
biological_process	GO:1903050	regulation of proteolysis involved in cellular protein catabolic process	21	CENPE, UBE2C, PLK3, RNF19B, RNF19A, FBXO22, FBXO5, GPX1, MAD2L1, SMAD7, MDM2, PLK1, AURKA, BUB1, BUB1B, TTK, SUMO1, NKD2, CCNB1, CDK1, CDC20	435	301	52692	7.64357e-12	4.15505e-08	1.52759e-10
biological_process	GO:0060548	negative regulation of cell death	34	CDKN1A, CEBPB, PLK3, ZNF385A, GCLM, GPX1, HMGB2, BIRC5, FAS, IL6, IL11, MAD2L1, MDM2, KITLG, NEFL, RRM2B, TRIAP1, SERPINF1, PLK1, ATAD3A, G2E3, TIGAR, STIL, AURKA, UCP2, BTG2, TXNDC5, BTBD10, TNFRSF10D, TNFRSF10B, NRP1, AURKB, CDK1, KIF14	422	896	52097	8.45557e-12	4.59645e-08	1.68368e-10
molecular_function	GO:0019901	protein kinase binding	26	KIF20A, TOB1, CDKN2C, DPYSL2, E2F1, TPX2, FBXO5, RACGAP1, KIF11, PCNA, PLK1, PRKAB1, ACTA2, AURKA, TOP2A, BORA, FAM83D, PPM1D, CCNA2, CCNB1, PRC1, NEK9, TRAF4, KIF14, CDC25A, CDC25C	430	509	52484	9.84289e-12	5.3506e-08	1.95277e-10
biological_process	GO:0007093	mitotic cell cycle checkpoint	17	CDKN1A, UBE2C, PLK3, MAD2L1, MDM2, TRIAP1, PLK1, BUB1, BUB1B, TOP2A, TTK, XPC, CCNA2, CCNB1, TICRR, CDK1, CDC20	439	174	52819	1.09067e-11	5.9289e-08	2.15596e-10
biological_process	GO:0042221	response to chemical	82	PLA2G4B, PTPRU, ARPC5, TOB1, CDKN1A, CEBPB, DPYSL4, ADAMTS7, OSBPL8, PLK3, KLF6, DDIT3, DPYSL2, E2F1, ECT2, ALDH3A1, ACSL4, FDXR, HSPA4L, FLRT2, KIF4A, NUPR1, SESN1, GCLM, ANG, GPX1, GRIN2C, CDIP1, HMGB2, BIRC5, ACER2, FAS, IL6, INHBB, KPNA2, SMAD7, MDM2, KITLG, MKI67, ASPH, ATF3, NEFL, NRF1, PCNA, SERPINF1, PGF, PLXNB3, PMAIP1, MEG3, PRKAB1, SULF2, CYP26B1, DIABLO, RGMA, TIGAR, SHTN1, RALGDS, RA…	374	4176	48817	1.10666e-11	6.01582e-08	2.17965e-10
biological_process	GO:0061136	regulation of proteasomal protein catabolic process	19	CENPE, UBE2C, PLK3, RNF19B, RNF19A, FBXO22, GPX1, MAD2L1, SMAD7, MDM2, PLK1, AURKA, BUB1, BUB1B, TTK, SUMO1, NKD2, CCNB1, CDC20	437	238	52755	1.16822e-11	6.35043e-08	2.29258e-10
cellular_component	GO:0005871	kinesin complex	12	KIF20A, CENPE, KIF2C, KIF18B, KIF4A, KIF11, KIFC1, KIF22, KIF15, KIF18A, KIF23, KIF14	444	56	52937	1.26355e-11	6.86866e-08	2.47074e-10
molecular_function	GO:0016787	hydrolase activity	58	PLA2G4B, ABHD14A-ACY1, PTPRU, KIF20A, CDKN3, DPYSL4, CENPE, KIF2C, PRSS23, ADAMTS7, CMBL, KIF18B, MANEAL, DPYSL2, DCP1B, HACD2, KIF4A, APOBEC3C, ANG, ACER2, INPP1, ITPK1, KIF11, KIFC1, KIF22, MCM6, ACHE, PCNA, SEPT5, ERCC6L, PPP1R3C, NADSYN1, NEIL3, NUDT15, PLCXD1, SULF2, KIF15, TIGAR, LDAH, RRAD, TAP1, TOP2A, TUBA4A, UNG, ARSJ, PIF1, KIF18A, NTPCR, PPM1D, RNGTT, CES2, KIF23, PREPL, ESPL1, DLGAP5…	398	2418	50575	1.28791e-11	7.00108e-08	2.50935e-10
biological_process	GO:0045787	positive regulation of cell cycle	21	CDKN1A, UBE2C, ECT2, RACGAP1, BIRC5, MAD2L1, MDM2, NUSAP1, TRIAP1, PLK1, STIL, AURKA, E2F8, FAM83D, PSRC1, CCNB1, AURKB, CCPG1, KIF23, ESPL1, KIF14	435	312	52681	1.40496e-11	7.63739e-08	2.72764e-10
biological_process	GO:0045862	positive regulation of proteolysis	22	UBE2C, PLK3, RNF19B, RNF19A, FBXO22, FBXO5, CYFIP2, ACER2, FAS, SMAD7, MDM2, ASPH, PLK1, PMAIP1, DIABLO, AURKA, SUMO1, NKD2, TNFRSF10B, CCNB1, CDK1, CDC20	434	352	52641	1.54254e-11	8.38526e-08	2.98408e-10
biological_process	GO:0042176	regulation of protein catabolic process	24	CENPE, UBE2C, PLK3, RNF19B, RNF19A, FBXO22, FBXO5, GPX1, GRIN2C, MAD2L1, SMAD7, MDM2, PLK1, AURKA, BUB1, BUB1B, TTK, UBE2G2, SUMO1, FAM83D, NKD2, CCNB1, CDK1, CDC20	432	434	52559	1.59288e-11	8.65891e-08	3.07054e-10
molecular_function	GO:0003676	nucleic acid binding	78	C7orf55-LUC7L2, CEBPB, CENPA, MXD4, DBF4, KIF2C, MRPL10, KLF6, HNRNPA1L2, ZFP90, DDB2, GADD45A, DDIT3, E2F1, E2F2, DCP1B, ELF2, KIF4A, FAM133B, LSM4, ZNF385A, ZNF337, NUPR1, APOBEC3C, ANG, UHRF1, GTF2A1, H2AFX, HMGB2, HOXA3, HOXC13, KIF22, KPNA2, SMAD7, MCM6, MEF2D, MKI67, ATF3, NFIC, NRF1, PCNA, NUSAP1, ZBTB7A, POLH, HES2, ERCC6L, GPATCH4, NEIL3, MIS18BP1, HJURP, MCM10, ZCCHC8, KIF15, GRHL3, CRE…	378	3911	49082	1.69296e-11	9.20293e-08	3.25192e-10
biological_process	GO:0006366	transcription from RNA polymerase II promoter	51	CEBPB, MXD4, PLK3, KLF6, ZFP90, DDIT3, E2F1, E2F2, ELF2, PHF19, FBXO5, SESN1, UHRF1, GTF2A1, SERTAD1, HMGB2, HOXC13, IL6, IL11, SMAD7, MDM2, MEF2D, ATF3, NFIC, NRF1, RRM2B, PCNA, ZBTB7A, TRIAP1, PLK1, PRKAB1, RGMA, TIGAR, ANKRA2, GRHL3, CREB3L2, TCEA1, ZNF354A, TOP2A, BTG2, SLBP, TBL1XR1, E2F8, SESN2, KLF7, RNGTT, AURKB, PTTG1, CCPG1, MICAL2, CDK1	405	1956	51037	1.70764e-11	9.28274e-08	3.26857e-10
biological_process	GO:0032446	protein modification by small protein conjugation	32	UBE2F-SCLY, TRIM3, UBE2C, RNF19B, MIB2, DDB2, RNF19A, FBXO22, FBXO5, UBE2S, UHRF1, BIRC5, MAD2L1, SMAD7, MDM2, PLK1, G2E3, PJA1, BUB1, BUB1B, TTK, UBE2G2, SUMO1, XPC, DERL1, CDCA3, DCAF5, CCNB1, CCNF, TRAF4, CDK1, CDC20	424	816	52177	1.75402e-11	9.53486e-08	3.34556e-10
biological_process	GO:1902850	microtubule cytoskeleton organization involved in mitosis	12	NDC80, CENPE, TPX2, KIF4A, RACGAP1, BIRC5, KIF11, KIFC1, NEK2, PLK1, AURKB, KIF23	444	58	52935	1.76612e-11	9.60065e-08	3.35687e-10
molecular_function	GO:0044877	macromolecular complex binding	42	ARPC5, KIF20A, CDKN1A, CEBPB, CENPA, CENPE, KIF2C, KIF18B, DPYSL2, CORO1C, KIF4A, FYB, NUPR1, GAS2L3, RACGAP1, UHRF1, HMGB2, HOXC13, BIRC5, KIF11, KIFC1, KIF22, SMAD7, ACHE, PCNA, NUSAP1, PLK1, SPDL1, KIF15, SHTN1, ANKRA2, GRHL3, VAMP2, TOP2A, FAM83D, KIF18A, PSRC1, TICRR, PRC1, KIF23, NCAPD2, KIF14	414	1385	51608	1.83857e-11	9.99445e-08	3.48239e-10
biological_process	GO:1903362	regulation of cellular protein catabolic process	21	CENPE, UBE2C, PLK3, RNF19B, RNF19A, FBXO22, FBXO5, GPX1, MAD2L1, SMAD7, MDM2, PLK1, AURKA, BUB1, BUB1B, TTK, SUMO1, NKD2, CCNB1, CDK1, CDC20	435	319	52674	2.04451e-11	1.11139e-07	3.85901e-10
biological_process	GO:0010965	regulation of mitotic sister chromatid separation	12	CENPE, UBE2C, FBXO5, MAD2L1, PLK1, BUB1, BUB1B, TTK, CCNB1, PTTG1, ESPL1, CDC20	444	59	52934	2.07948e-11	1.1304e-07	3.91143e-10
molecular_function	GO:0016740	transferase activity	54	UBE2F-SCLY, CDKN1A, LOC102724428, ST6GALNAC2, TRIM3, UBE2C, ATE1, PLK3, RNF19B, MIB2, DGKA, DDB2, AK1, ISCU, RNF19A, GAMT, FBXO22, UBE2S, C1GALT1C1, UHRF1, BIRC5, ITPK1, MDM2, NEK2, AK3, ZDHHC9, PLK1, POLH, G2E3, PRKAB1, ADCK3, POLD4, BCAT1, RABGGTA, SCP2, SDF2, PJA1, NME1-NME2, AURKA, BUB1, BUB1B, TTK, UBE2G2, SUMO1, WEE1, CHAC1, RNGTT, NRP1, CCNB1, DYRK1B, NEK9, AURKB, TRAF4, CDK1	402	2178	50815	2.35395e-11	1.27961e-07	4.41244e-10
biological_process	GO:0016567	protein ubiquitination	30	UBE2F-SCLY, TRIM3, UBE2C, RNF19B, MIB2, DDB2, RNF19A, FBXO22, FBXO5, UBE2S, UHRF1, BIRC5, MAD2L1, SMAD7, MDM2, PLK1, G2E3, PJA1, BUB1, BUB1B, TTK, UBE2G2, DERL1, CDCA3, DCAF5, CCNB1, CCNF, TRAF4, CDK1, CDC20	426	724	52269	2.41272e-11	1.31155e-07	4.50705e-10
biological_process	GO:0033045	regulation of sister chromatid segregation	12	CENPE, UBE2C, FBXO5, MAD2L1, PLK1, BUB1, BUB1B, TTK, CCNB1, PTTG1, ESPL1, CDC20	444	60	52933	2.44202e-11	1.32748e-07	4.53065e-10
biological_process	GO:0033047	regulation of mitotic sister chromatid segregation	12	CENPE, UBE2C, FBXO5, MAD2L1, PLK1, BUB1, BUB1B, TTK, CCNB1, PTTG1, ESPL1, CDC20	444	60	52933	2.44202e-11	1.32748e-07	4.53065e-10
cellular_component	GO:0000780	condensed nuclear chromosome, centromeric region	9	NDC80, CENPA, PLK1, MIS18BP1, AURKA, BUB1, BUB1B, CCNB1, AURKB	447	17	52976	2.47164e-11	1.34358e-07	4.57001e-10
biological_process	GO:0006355	regulation of transcription, DNA-templated	71	TOB1, CEBPB, MXD4, CENPF, PNRC1, PLK3, KLF6, ZFP90, DDIT3, E2F1, E2F2, ELF2, ZNF385A, PHF19, ZNF337, FBXO5, NUPR1, BLOC1S2, UHRF1, GTF2A1, SERTAD1, H2AFX, HMGB2, HOXA3, HOXC13, BIRC5, IL6, IL11, SMAD7, MDM2, MEF2D, ASPH, ATF3, NFIC, NRF1, PCNA, ZBTB7A, TRIAP1, PLK1, HES2, LGR4, MEG3, MED29, DEPDC1, RGMA, SFMBT2, ANKRA2, GRHL3, EDA2R, CREB3L2, TCEA1, ZNF354A, TOP2A, SUMO1, ZNF79, BTG2, TBL1XR1, E2…	385	3415	49578	2.48211e-11	1.34928e-07	4.57382e-10
biological_process	GO:0051252	regulation of RNA metabolic process	73	TOB1, CEBPB, MXD4, CENPF, PNRC1, PLK3, KLF6, ZFP90, DDIT3, E2F1, E2F2, ELF2, ZNF385A, PHF19, ZNF337, FBXO5, NUPR1, BLOC1S2, UHRF1, GTF2A1, SERTAD1, H2AFX, HMGB2, HOXA3, HOXC13, BIRC5, IL6, IL11, SMAD7, MDM2, MEF2D, ASPH, ATF3, NFIC, NRF1, PCNA, ZBTB7A, TRIAP1, PLK1, HES2, LGR4, MEG3, MED29, DEPDC1, RGMA, SFMBT2, ANKRA2, GRHL3, EDA2R, CREB3L2, TCEA1, ZNF354A, TOP2A, SUMO1, ZNF79, BTG2, TBL1XR1, E2…	383	3555	49438	2.64581e-11	1.43826e-07	4.85899e-10
biological_process	GO:0019220	regulation of phosphate metabolic process	46	CDKN1A, CDKN2C, CDKN3, CENPE, UBE2C, OSBPL8, CDCA2, GADD45A, ECT2, TPX2, CORO1C, PLXNB2, ANG, GRIN2C, SERTAD1, IGFBP3, IL6, IL11, INHBB, SMAD7, KITLG, ATF3, NEFL, PLK1, PPP2R2C, PRKAB1, TIGAR, RAP2B, EDA2R, STIL, TTK, SH3BP5L, FAM83D, SESN2, BTBD10, PSRC1, NRP1, CCNA2, CCNB1, CCNG1, GDF15, TRAF4, CDK1, KIF14, CDC25A, CDC25C	410	1656	51337	2.80426e-11	1.52439e-07	5.13264e-10
biological_process	GO:0043069	negative regulation of programmed cell death	32	CDKN1A, CEBPB, PLK3, ZNF385A, GCLM, GPX1, HMGB2, BIRC5, FAS, IL6, IL11, MAD2L1, MDM2, KITLG, NEFL, RRM2B, TRIAP1, PLK1, ATAD3A, G2E3, TIGAR, STIL, AURKA, UCP2, BTG2, TXNDC5, TNFRSF10D, TNFRSF10B, NRP1, AURKB, CDK1, KIF14	424	834	52159	2.96108e-11	1.60964e-07	5.40149e-10
cellular_component	GO:0000794	condensed nuclear chromosome	13	NDC80, CENPA, H2AFX, INCENP, NEK2, PLK1, MIS18BP1, AURKA, BUB1, BUB1B, CCNB1, AURKB, NCAPD2	443	82	52911	3.18957e-11	1.73385e-07	5.77951e-10
biological_process	GO:0051782	negative regulation of cell division	13	UBE2C, ASPM, FBXO5, MAD2L1, PLK1, BUB1, BUB1B, TTK, E2F8, CCNB1, AURKB, PTTG1, CDC20	443	82	52911	3.18957e-11	1.73385e-07	5.77951e-10
molecular_function	GO:0003677	DNA binding	57	CEBPB, CENPA, MXD4, KIF2C, KLF6, ZFP90, DDB2, GADD45A, DDIT3, E2F1, E2F2, ELF2, KIF4A, ZNF385A, ZNF337, NUPR1, ANG, UHRF1, GTF2A1, H2AFX, HMGB2, HOXA3, HOXC13, KIF22, SMAD7, MCM6, MEF2D, ATF3, NFIC, NRF1, PCNA, NUSAP1, ZBTB7A, POLH, HES2, ERCC6L, NEIL3, MIS18BP1, HJURP, MCM10, KIF15, GRHL3, CREB3L2, TCEA1, ZNF354A, TOP2A, XPC, ZNF79, ZFAND5, TBL1XR1, E2F8, PIF1, MTERF2, HIST1H2AC, MXD3, KLF7, TRA…	399	2408	50585	3.28312e-11	1.7847e-07	5.92925e-10
biological_process	GO:0051174	regulation of phosphorus metabolic process	46	CDKN1A, CDKN2C, CDKN3, CENPE, UBE2C, OSBPL8, CDCA2, GADD45A, ECT2, TPX2, CORO1C, PLXNB2, ANG, GRIN2C, SERTAD1, IGFBP3, IL6, IL11, INHBB, SMAD7, KITLG, ATF3, NEFL, PLK1, PPP2R2C, PRKAB1, TIGAR, RAP2B, EDA2R, STIL, TTK, SH3BP5L, FAM83D, SESN2, BTBD10, PSRC1, NRP1, CCNA2, CCNB1, CCNG1, GDF15, TRAF4, CDK1, KIF14, CDC25A, CDC25C	410	1669	51324	3.58948e-11	1.95124e-07	6.45177e-10
biological_process	GO:0044843	cell cycle G1/S phase transition	19	CDKN1A, CDKN2C, CDKN3, DBF4, PLK3, E2F1, FBXO5, MCM6, MDM2, PCNA, TRIAP1, MCM10, BCAT1, WEE1, FAM83D, CCNB1, CDK1, KIF14, CDC25A	437	256	52737	3.59618e-11	1.95489e-07	6.45177e-10
biological_process	GO:0051304	chromosome separation	12	UBE2C, FBXO5, MAD2L1, PLK1, BUB1, BUB1B, TOP2A, TTK, PTTG1, ESPL1, CDC20, NCAPD2	444	63	52930	3.89615e-11	2.11795e-07	6.96693e-10
biological_process	GO:0051225	spindle assembly	13	TPX2, KIF4A, ASPM, FBXO5, RACGAP1, BIRC5, KIF11, KIFC1, NEK2, PLK1, AURKA, AURKB, KIF23	443	85	52908	4.65307e-11	2.52941e-07	8.29314e-10
biological_process	GO:1903506	regulation of nucleic acid-templated transcription	71	TOB1, CEBPB, MXD4, CENPF, PNRC1, PLK3, KLF6, ZFP90, DDIT3, E2F1, E2F2, ELF2, ZNF385A, PHF19, ZNF337, FBXO5, NUPR1, BLOC1S2, UHRF1, GTF2A1, SERTAD1, H2AFX, HMGB2, HOXA3, HOXC13, BIRC5, IL6, IL11, SMAD7, MDM2, MEF2D, ASPH, ATF3, NFIC, NRF1, PCNA, ZBTB7A, TRIAP1, PLK1, HES2, LGR4, MEG3, MED29, DEPDC1, RGMA, SFMBT2, ANKRA2, GRHL3, EDA2R, CREB3L2, TCEA1, ZNF354A, TOP2A, SUMO1, ZNF79, BTG2, TBL1XR1, E2…	385	3434	49559	4.90209e-11	2.66477e-07	8.70841e-10
biological_process	GO:2001141	regulation of RNA biosynthetic process	71	TOB1, CEBPB, MXD4, CENPF, PNRC1, PLK3, KLF6, ZFP90, DDIT3, E2F1, E2F2, ELF2, ZNF385A, PHF19, ZNF337, FBXO5, NUPR1, BLOC1S2, UHRF1, GTF2A1, SERTAD1, H2AFX, HMGB2, HOXA3, HOXC13, BIRC5, IL6, IL11, SMAD7, MDM2, MEF2D, ASPH, ATF3, NFIC, NRF1, PCNA, ZBTB7A, TRIAP1, PLK1, HES2, LGR4, MEG3, MED29, DEPDC1, RGMA, SFMBT2, ANKRA2, GRHL3, EDA2R, CREB3L2, TCEA1, ZNF354A, TOP2A, SUMO1, ZNF79, BTG2, TBL1XR1, E2…	385	3455	49538	5.48682e-11	2.98264e-07	9.71543e-10
biological_process	GO:0051129	negative regulation of cellular component organization	26	UBE2C, CORO1C, FBXO5, GPX1, ARPIN, MAD2L1, SMAD7, NEK2, TRIAP1, PLK1, PLXNB3, RGMA, TIGAR, AURKA, BUB1, BUB1B, TTK, PIF1, NRP1, CCNB1, CCNF, AURKB, PTTG1, NTN1, CDC20, KIF14	430	555	52438	5.68399e-11	3.08982e-07	1.00319e-09
biological_process	GO:0008284	positive regulation of cell proliferation	31	CDKN1A, CRIP2, E2F1, ALDH3A1, VWCE, ICOSLG, ASPM, BLOC1S2, ANG, SERTAD1, HMGB2, HOXA3, BIRC5, ACER2, IL6, IL11, MDM2, KITLG, PGF, PLXNB3, TTK, TNFSF9, NRP1, CCNA2, CCNB1, C9orf69, PRC1, CCPG1, NTN1, CDC20, KIF14	425	807	52186	6.20258e-11	3.37172e-07	1.09117e-09
biological_process	GO:0045930	negative regulation of mitotic cell cycle	18	CDKN1A, UBE2C, PLK3, MAD2L1, MDM2, TRIAP1, PLK1, BUB1, BUB1B, TOP2A, TTK, XPC, CCNA2, CCNB1, TICRR, PTTG1, CDK1, CDC20	438	235	52758	8.34931e-11	4.53868e-07	1.46409e-09
biological_process	GO:0032879	regulation of localization	54	PTPRU, CDKN1A, TACC3, SPAG5, CYGB, OSBPL8, PLK3, DDIT3, DPYSL2, E2F1, ECT2, STOM, ACSL4, ASTN2, CORO1C, PLXNB2, FLRT2, ANG, RACGAP1, BIRC5, ARPIN, IGFBP3, IL6, IL11, INHBB, SMAD7, KITLG, ACHE, ASPH, NEK2, TRIAP1, SERPINF1, PLXNB3, PMAIP1, SEPT5, LGR4, SHTN1, RANGAP1, RAP2B, SCP2, VAMP2, UBE2G2, SUMO1, UCP2, BORA, NETO2, ARHGEF39, NKD2, NRP1, CCNB1, KNSTRN, NTN1, TP53INP1, KIF14	402	2258	50735	8.42985e-11	4.58247e-07	1.47346e-09
biological_process	GO:0000079	regulation of cyclin-dependent protein serine/threonine kinase activity	13	CDKN1A, CDKN2C, CDKN3, UBE2C, GADD45A, SERTAD1, PLK1, STIL, PSRC1, CCNA2, CCNG1, CDC25A, CDC25C	443	90	52903	8.48697e-11	4.61352e-07	1.47869e-09
biological_process	GO:0032886	regulation of microtubule-based process	15	TACC3, SPAG5, ECT2, TPX2, RACGAP1, KIF11, NEK2, PLK1, AURKA, BORA, PSRC1, CCNB1, CCNF, KNSTRN, AURKB	441	143	52850	9.94147e-11	5.40418e-07	1.72658e-09
biological_process	GO:0070507	regulation of microtubule cytoskeleton organization	14	SPAG5, ECT2, TPX2, RACGAP1, KIF11, NEK2, PLK1, AURKA, BORA, PSRC1, CCNB1, CCNF, KNSTRN, AURKB	442	116	52877	1.00114e-10	5.44217e-07	1.7325e-09
biological_process	GO:0043066	negative regulation of apoptotic process	31	CDKN1A, CEBPB, PLK3, ZNF385A, GCLM, GPX1, HMGB2, BIRC5, FAS, IL6, IL11, MAD2L1, MDM2, KITLG, NEFL, RRM2B, TRIAP1, PLK1, ATAD3A, G2E3, STIL, AURKA, UCP2, BTG2, TXNDC5, TNFRSF10D, TNFRSF10B, NRP1, AURKB, CDK1, KIF14	425	824	52169	1.00393e-10	5.45737e-07	1.7325e-09
biological_process	GO:0009628	response to abiotic stimulus	36	CDKN1A, TACC3, CYGB, PLK3, DDB2, GADD45A, E2F1, ECT2, ALDH3A1, ANG, GPX1, H2AFX, FAS, IL6, INHBB, MDM2, MKI67, NRF1, RDH11, PCNA, TRIAP1, SERPINF1, PGF, PMAIP1, POLH, TIGAR, UCP2, XPC, BTG2, PPM1D, TNFRSF10B, CCNB1, TICRR, AURKB, TP53INP1, CDC25A	420	1110	51883	1.17019e-10	6.36113e-07	2.01302e-09
molecular_function	GO:0003777	microtubule motor activity	12	KIF20A, CENPE, KIF2C, KIF18B, KIF4A, KIF11, KIFC1, KIF22, KIF15, KIF18A, KIF23, KIF14	444	71	52922	1.22798e-10	6.67527e-07	2.10576e-09
biological_process	GO:0031577	spindle checkpoint	11	UBE2C, BIRC5, MAD2L1, PLK1, SPDL1, BUB1, BUB1B, TTK, CCNB1, AURKB, CDC20	445	52	52941	1.31217e-10	7.13296e-07	2.24307e-09
biological_process	GO:0090068	positive regulation of cell cycle process	18	CDKN1A, UBE2C, ECT2, RACGAP1, BIRC5, MAD2L1, MDM2, NUSAP1, TRIAP1, PLK1, AURKA, E2F8, FAM83D, CCNB1, AURKB, KIF23, ESPL1, KIF14	438	243	52750	1.35825e-10	7.38346e-07	2.31456e-09
molecular_function	GO:0032403	protein complex binding	32	ARPC5, KIF20A, CDKN1A, CENPE, KIF2C, KIF18B, DPYSL2, CORO1C, KIF4A, FYB, GAS2L3, RACGAP1, UHRF1, BIRC5, KIF11, KIFC1, KIF22, SMAD7, ACHE, PCNA, NUSAP1, PLK1, SPDL1, KIF15, SHTN1, VAMP2, FAM83D, KIF18A, PSRC1, PRC1, KIF23, KIF14	424	894	52099	1.53883e-10	8.36506e-07	2.61408e-09
biological_process	GO:0000082	G1/S transition of mitotic cell cycle	18	CDKN1A, CDKN2C, CDKN3, DBF4, PLK3, E2F1, FBXO5, MCM6, MDM2, PCNA, TRIAP1, MCM10, BCAT1, WEE1, CCNB1, CDK1, KIF14, CDC25A	438	247	52746	1.72116e-10	9.35624e-07	2.91472e-09
biological_process	GO:0009894	regulation of catabolic process	28	TOB1, CENPE, UBE2C, PLK3, RNF19B, RNF19A, FBXO22, FBXO5, GPX1, GRIN2C, MAD2L1, SMAD7, MDM2, PLK1, TIGAR, AURKA, BUB1, BUB1B, TTK, UBE2G2, SUMO1, BTG2, FAM83D, NKD2, CCNB1, TP53INP1, CDK1, CDC20	428	687	52306	1.78089e-10	9.68089e-07	3.00649e-09
cellular_component	GO:0000940	condensed chromosome outer kinetochore	8	NDC80, CENPE, CENPF, PLK1, SPDL1, BUB1, BUB1B, CCNB1	448	13	52980	2.18003e-10	1.18507e-06	3.66893e-09
biological_process	GO:0008608	attachment of spindle microtubules to kinetochore	9	NDC80, SPAG5, CENPE, ECT2, RACGAP1, NEK2, CCNB1, KNSTRN, AURKB	447	24	52969	2.28151e-10	1.24023e-06	3.82786e-09
biological_process	GO:0006260	DNA replication	19	DBF4, IL6, MCM6, KITLG, ACHE, NFIC, RRM2B, PCNA, POLH, MCM10, POLD4, TOP2A, SLBP, E2F8, PIF1, TICRR, CDK1, CDC25A, CDC25C	437	289	52704	2.29459e-10	1.24734e-06	3.83797e-09
biological_process	GO:1904029	regulation of cyclin-dependent protein kinase activity	14	CDKN1A, CDKN2C, CDKN3, UBE2C, GADD45A, SERTAD1, PLK1, STIL, SH3BP5L, PSRC1, CCNA2, CCNG1, CDC25A, CDC25C	442	125	52868	2.34144e-10	1.27281e-06	3.90432e-09
biological_process	GO:0097193	intrinsic apoptotic signaling pathway	19	CDKN1A, CEBPB, DDIT3, E2F1, E2F2, PHLDA3, ZNF385A, NUPR1, GPX1, CDIP1, RRM2B, TRIAP1, PMAIP1, G2E3, DIABLO, EDA2R, BUB1, CHAC1, TNFRSF10B	437	290	52703	2.41817e-10	1.31451e-06	4.00767e-09
biological_process	GO:0010639	negative regulation of organelle organization	19	UBE2C, FBXO5, GPX1, ARPIN, MAD2L1, NEK2, TRIAP1, PLK1, TIGAR, AURKA, BUB1, BUB1B, TTK, PIF1, CCNB1, CCNF, AURKB, PTTG1, CDC20	437	290	52703	2.41817e-10	1.31451e-06	4.00767e-09
biological_process	GO:0031401	positive regulation of protein modification process	36	CDKN1A, CENPE, UBE2C, OSBPL8, CDCA2, GADD45A, ECT2, TPX2, PHF19, FBXO22, FBXO5, NUPR1, UBE2S, ANG, GRIN2C, IGFBP3, IL6, IL11, INHBB, SMAD7, KITLG, NEFL, PLK1, RAP2B, EDA2R, STIL, TTK, DERL1, PSRC1, NRP1, CCNB1, GDF15, TRAF4, CDK1, CDC20, KIF14	420	1155	51838	3.24453e-10	1.76373e-06	5.36087e-09
biological_process	GO:0043549	regulation of kinase activity	31	CDKN1A, CDKN2C, CDKN3, CENPE, UBE2C, OSBPL8, GADD45A, ECT2, TPX2, CORO1C, ANG, GRIN2C, SERTAD1, IL6, KITLG, NEFL, PLK1, PRKAB1, TIGAR, RAP2B, STIL, SH3BP5L, SESN2, PSRC1, CCNA2, CCNG1, TRAF4, CDK1, KIF14, CDC25A, CDC25C	425	870	52123	3.4782e-10	1.89075e-06	5.72955e-09
biological_process	GO:0045859	regulation of protein kinase activity	30	CDKN1A, CDKN2C, CDKN3, CENPE, UBE2C, OSBPL8, GADD45A, ECT2, TPX2, CORO1C, ANG, GRIN2C, SERTAD1, IL6, KITLG, NEFL, PLK1, PRKAB1, RAP2B, STIL, SH3BP5L, SESN2, PSRC1, CCNA2, CCNG1, TRAF4, CDK1, KIF14, CDC25A, CDC25C	426	821	52172	4.05606e-10	2.20488e-06	6.66125e-09
biological_process	GO:0070647	protein modification by small protein conjugation or removal	32	UBE2F-SCLY, TRIM3, UBE2C, RNF19B, MIB2, DDB2, RNF19A, FBXO22, FBXO5, UBE2S, UHRF1, BIRC5, MAD2L1, SMAD7, MDM2, PLK1, G2E3, PJA1, BUB1, BUB1B, TTK, UBE2G2, SUMO1, XPC, DERL1, CDCA3, DCAF5, CCNB1, CCNF, TRAF4, CDK1, CDC20	424	935	52058	4.38567e-10	2.38405e-06	7.18088e-09
biological_process	GO:0010628	positive regulation of gene expression	44	TOB1, CEBPB, KLF6, ZFP90, DDIT3, E2F1, ELF2, BLOC1S2, UHRF1, SERTAD1, HMGB2, HOXC13, IL6, IL11, SMAD7, MEF2D, ASPH, ATF3, NFIC, NRF1, TRIAP1, LGR4, MEG3, PRKAB1, CYP26B1, RGMA, GRHL3, ACTA2, EDA2R, CREB3L2, TCEA1, TOP2A, BTG2, TBL1XR1, E2F8, PSRC1, NKD2, KLF7, CCNA2, CCNB1, DYRK1B, CCPG1, TP53INP1, MICAL2	412	1677	51316	4.49556e-10	2.44379e-06	7.3387e-09
biological_process	GO:0044092	negative regulation of molecular function	34	CDKN1A, CDKN2C, UBE2C, ZFP90, GADD45A, DDIT3, E2F1, CORO1C, FBXO5, GPX1, BIRC5, FAS, IL6, MAD2L1, SMAD7, NEK2, TRIAP1, SERPINF1, PLK1, PLXNB3, PEX19, AURKA, BUB1, BUB1B, TTK, SUMO1, PIF1, SH3BP5L, ANP32E, TNFRSF10B, CCNB1, AURKB, PTTG1, CDC20	422	1054	51939	4.80488e-10	2.61193e-06	7.82016e-09
biological_process	GO:1903052	positive regulation of proteolysis involved in cellular protein catabolic process	15	UBE2C, PLK3, RNF19B, RNF19A, FBXO22, FBXO5, SMAD7, MDM2, PLK1, AURKA, SUMO1, NKD2, CCNB1, CDK1, CDC20	441	166	52827	6.10474e-10	3.31854e-06	9.90608e-09
biological_process	GO:1901991	negative regulation of mitotic cell cycle phase transition	15	CDKN1A, UBE2C, PLK3, MAD2L1, MDM2, TRIAP1, PLK1, BUB1, BUB1B, TTK, CCNA2, CCNB1, TICRR, CDK1, CDC20	441	168	52825	7.05826e-10	3.83687e-06	1.14193e-08
biological_process	GO:0051248	negative regulation of protein metabolic process	33	TOB1, CDKN1A, CDKN2C, UBE2C, GADD45A, CORO1C, FBXO5, ANG, GPX1, GRIN2C, BIRC5, ACER2, IGFBP3, FAS, IL6, INHBB, MAD2L1, SMAD7, ATF3, TRIAP1, SERPINF1, PLK1, BUB1, BUB1B, TTK, UBE2G2, BTG2, CHAC1, SH3BP5L, TNFRSF10B, CCNB1, PTTG1, CDC20	423	1016	51977	7.71512e-10	4.19394e-06	1.24449e-08
biological_process	GO:0031329	regulation of cellular catabolic process	25	TOB1, CENPE, UBE2C, PLK3, RNF19B, RNF19A, FBXO22, FBXO5, GPX1, MAD2L1, SMAD7, MDM2, PLK1, TIGAR, AURKA, BUB1, BUB1B, TTK, SUMO1, BTG2, NKD2, CCNB1, TP53INP1, CDK1, CDC20	431	586	52407	8.53678e-10	4.64059e-06	1.37296e-08
cellular_component	GO:0000778	condensed nuclear chromosome kinetochore	7	NDC80, CENPA, PLK1, MIS18BP1, BUB1, BUB1B, CCNB1	449	8	52985	1.04396e-09	5.67495e-06	1.67403e-08
biological_process	GO:0072332	intrinsic apoptotic signaling pathway by p53 class mediator	11	CDKN1A, E2F1, E2F2, PHLDA3, ZNF385A, NUPR1, CDIP1, RRM2B, TRIAP1, PMAIP1, EDA2R	445	67	52926	1.19495e-09	6.49572e-06	1.91051e-08
biological_process	GO:0007166	cell surface receptor signaling pathway	57	PTPRU, ARPC5, TOB1, CDKN1A, OSBPL8, MIB2, DDIT3, E2F1, ECT2, PLXNB2, FYB, ASPM, CYFIP2, GCLM, BLOC1S2, GPX1, GRIN2C, CDIP1, HMGB2, IGFBP3, FAS, IL6, INHBB, CD82, KPNA2, SMAD7, MDM2, KITLG, ATF3, NEFL, PGF, PLXNB3, PMAIP1, LGR4, MEG3, PRKAB1, DEPDC1B, SULF2, DIABLO, RGMA, SHTN1, GRHL3, RALGDS, EDA2R, STIL, TTK, SUMO1, ZFAND5, CHAC1, TBL1XR1, SHCBP1, NETO2, NKD2, TNFRSF10B, NRP1, GDF15, CD70	399	2659	50334	1.20953e-09	6.57502e-06	1.92816e-08
biological_process	GO:0045935	positive regulation of nucleobase-containing compound metabolic process	43	TOB1, CEBPB, KLF6, ZFP90, DDIT3, E2F1, ELF2, BLOC1S2, UHRF1, SERTAD1, HMGB2, HOXC13, IL6, IL11, SMAD7, MEF2D, KITLG, ASPH, ATF3, NFIC, NRF1, PCNA, TRIAP1, LGR4, MEG3, RGMA, TIGAR, GRHL3, EDA2R, CREB3L2, TCEA1, TOP2A, BTG2, TBL1XR1, E2F8, PSRC1, KLF7, CCNA2, CCNB1, DYRK1B, CCPG1, TP53INP1, MICAL2	413	1671	51322	1.28498e-09	6.98518e-06	2.04245e-08
biological_process	GO:0051254	positive regulation of RNA metabolic process	40	TOB1, CEBPB, KLF6, ZFP90, DDIT3, E2F1, ELF2, BLOC1S2, UHRF1, SERTAD1, HMGB2, HOXC13, IL6, IL11, SMAD7, MEF2D, ASPH, ATF3, NFIC, NRF1, TRIAP1, LGR4, MEG3, RGMA, GRHL3, EDA2R, CREB3L2, TCEA1, TOP2A, BTG2, TBL1XR1, E2F8, PSRC1, KLF7, CCNA2, CCNB1, DYRK1B, CCPG1, TP53INP1, MICAL2	416	1476	51517	1.35421e-09	7.36151e-06	2.14621e-08
biological_process	GO:0051306	mitotic sister chromatid separation	10	UBE2C, FBXO5, MAD2L1, PLK1, BUB1, BUB1B, TTK, PTTG1, ESPL1, CDC20	446	48	52945	1.36006e-09	7.39328e-06	2.14921e-08
biological_process	GO:1903364	positive regulation of cellular protein catabolic process	15	UBE2C, PLK3, RNF19B, RNF19A, FBXO22, FBXO5, SMAD7, MDM2, PLK1, AURKA, SUMO1, NKD2, CCNB1, CDK1, CDC20	441	179	52814	1.51947e-09	8.25985e-06	2.39416e-08
biological_process	GO:0048468	cell development	49	ARPC5, CDKN1A, DPYSL4, CFL2, RTN4RL1, DPYSL2, ECT2, ACSL4, CORO1C, PLXNB2, FLRT2, KIF4A, ASPM, ZNF385A, FBXO22, FBXO5, BLOC1S2, GPX1, GRIN2C, C1GALT1C1, HMGB2, IL6, INHBB, SMAD7, KITLG, ACHE, NEFL, SERPINF1, PLXNB3, MEG3, SULF2, RGMA, TIGAR, SHTN1, ACTA2, RAP2B, AURKA, WEE1, BTG2, FAM83D, KLF7, NRP1, CCNB1, NTN1, GDF15, CDK1, CDC20, KIF14, PTBP3	407	2098	50895	1.57887e-09	8.58272e-06	2.48055e-08
biological_process	GO:1901988	negative regulation of cell cycle phase transition	15	CDKN1A, UBE2C, PLK3, MAD2L1, MDM2, TRIAP1, PLK1, BUB1, BUB1B, TTK, CCNA2, CCNB1, TICRR, CDK1, CDC20	441	180	52813	1.62508e-09	8.83396e-06	2.54581e-08
molecular_function	GO:0042802	identical protein binding	35	NDC80, CEBPB, CENPF, DDIT3, ECT2, STOM, GAMT, ANG, UHRF1, GPSM2, BIRC5, FAS, INHBB, MAD2L1, MCM6, MDM2, ACHE, ATF3, NEFL, NRF1, PCNA, PGF, HJURP, MCM10, BCAT1, SMN1, VAMP2, TAP1, TOP2A, UBE2G2, E2F8, MTERF2, PVRL4, PRC1, TP53I3	421	1172	51821	1.71125e-09	9.30233e-06	2.67308e-08
biological_process	GO:1902531	regulation of intracellular signal transduction	41	OSBPL8, MIB2, GADD45A, DDIT3, ECT2, PHLDA3, ZNF385A, SESN1, GPX1, GRIN2C, RACGAP1, IGFBP3, IL6, IL11, INHBB, MDM2, KITLG, ASPH, ATF3, NEFL, RRM2B, TRIAP1, PMAIP1, G2E3, DEPDC1B, TMEM9B, EDA2R, EPS8L2, BUB1, NLRX1, FAM83D, ARHGEF39, TNFRSF10B, NRP1, ARHGAP11B, ARHGAP29, GDF15, TRAF4, ARHGAP11A, CDK1, KIF14	415	1571	51422	2.28434e-09	1.24177e-05	3.55807e-08
biological_process	GO:0009611	response to wounding	32	CENPE, KIF2C, KLF6, RTN4RL1, DGKA, KIF4A, GPX1, GRIN2C, C1GALT1C1, RACGAP1, IL6, ITPK1, KIF11, KIFC1, KIF22, ACHE, NEFL, NINJ1, AK3, SERPINF1, KIF15, GRHL3, RANGAP1, RAP2B, VAMP2, TUBA4A, WEE1, NLRX1, KIF18A, CCNB1, SLC7A6, KIF23	424	1005	51988	2.30009e-09	1.25033e-05	3.57237e-08
biological_process	GO:0009888	tissue development	44	CDKN1A, CEBPB, CENPF, ADAMTS7, CORO1C, PLXNB2, FBXO22, NUPR1, GPX1, GPSM2, HOXA3, HOXC13, IL6, SMAD7, MEF2D, KITLG, ACHE, ATF3, NINJ1, PCNA, SERPINF1, PGF, LGR4, MEG3, SULF2, CYP26B1, RGMA, TIGAR, GRHL3, ACTA2, RAP2B, EDA2R, CREB3L2, STIL, ZFAND5, BTG2, E2F8, FAM83D, NRP1, CCNB1, DYRK1B, NTN1, MICAL2, CDK1	412	1782	51211	2.62948e-09	1.42939e-05	4.07232e-08
biological_process	GO:0031331	positive regulation of cellular catabolic process	18	TOB1, UBE2C, PLK3, RNF19B, RNF19A, FBXO22, FBXO5, SMAD7, MDM2, PLK1, AURKA, SUMO1, BTG2, NKD2, CCNB1, TP53INP1, CDK1, CDC20	438	300	52693	2.79913e-09	1.52161e-05	4.32275e-08
biological_process	GO:0090307	mitotic spindle assembly	10	TPX2, KIF4A, RACGAP1, BIRC5, KIF11, KIFC1, NEK2, PLK1, AURKB, KIF23	446	53	52940	2.95375e-09	1.60566e-05	4.5486e-08
biological_process	GO:0006281	DNA repair	21	DDB2, GADD45A, UHRF1, H2AFX, HMGB2, KIF22, RRM2B, PCNA, POLH, NEIL3, TIGAR, POLD4, TCEA1, SUMO1, UNG, XPC, BTG2, PIF1, TICRR, PTTG1, CDK1	435	441	52552	4.31749e-09	2.34699e-05	6.62991e-08
biological_process	GO:0070887	cellular response to chemical stimulus	56	PLA2G4B, TOB1, CDKN1A, CEBPB, ADAMTS7, OSBPL8, PLK3, KLF6, DDIT3, E2F1, ECT2, FDXR, GCLM, GPX1, GRIN2C, CDIP1, HMGB2, BIRC5, ACER2, FAS, IL6, INHBB, KPNA2, SMAD7, MDM2, KITLG, ASPH, ATF3, NEFL, SERPINF1, PGF, PLXNB3, PMAIP1, MEG3, PRKAB1, SULF2, CYP26B1, DIABLO, RGMA, TIGAR, RALGDS, RANGAP1, EDA2R, SDF2, CREB3L2, VAMP2, UBE2G2, SUMO1, UCP2, DERL1, SHCBP1, NRP1, CCNB1, TP53INP1, GDF15, CD70	400	2666	50327	4.4623e-09	2.42571e-05	6.83298e-08
biological_process	GO:0006810	transport	78	C15orf38-AP3S2, ARPC5, KIF20A, TOB1, CDKN1A, TACC3, TRIM3, TGOLN2, CENPF, CYGB, OSBPL8, PLK3, RNF19B, COX15, HNRNPA1L2, DDIT3, DPYSL2, E2F1, ECT2, STOM, ACSL4, ARL6IP1, CORO1C, KIF4A, FYB, FBXO22, CYFIP2, NSG1, SLCO4A1, BLOC1S2, ANG, GRIN2C, RACGAP1, BIRC5, IL6, IL11, INHBB, KPNA2, ACHE, ASPH, NEFL, ZDHHC9, TRIAP1, PMAIP1, SEPT5, VPS13C, SLC52A1, TMEM63B, LGR4, MEG3, GOPC, PEX19, RANGAP1, SCP2, C…	378	4432	48561	4.56848e-09	2.48343e-05	6.97592e-08
biological_process	GO:0051173	positive regulation of nitrogen compound metabolic process	43	TOB1, CEBPB, KLF6, ZFP90, DDIT3, E2F1, ELF2, BLOC1S2, UHRF1, SERTAD1, HMGB2, HOXC13, IL6, IL11, SMAD7, MEF2D, KITLG, ASPH, ATF3, NFIC, NRF1, PCNA, TRIAP1, LGR4, MEG3, RGMA, TIGAR, GRHL3, EDA2R, CREB3L2, TCEA1, TOP2A, BTG2, TBL1XR1, E2F8, PSRC1, KLF7, CCNA2, CCNB1, DYRK1B, CCPG1, TP53INP1, MICAL2	413	1748	51245	4.58609e-09	2.493e-05	6.98319e-08
biological_process	GO:0061640	cytoskeleton-dependent cytokinesis	9	KIF20A, KIF4A, RACGAP1, NUSAP1, PLK1, ANLN, CEP55, AURKB, KIF23	447	38	52955	5.09963e-09	2.77216e-05	7.73185e-08
biological_process	GO:0051340	regulation of ligase activity	13	UBE2C, FBXO5, GCLM, UBE2S, MAD2L1, SMAD7, PLK1, BUB1, BUB1B, TTK, CCNB1, CDK1, CDC20	443	133	52860	5.10621e-09	2.77574e-05	7.73185e-08
biological_process	GO:0010558	negative regulation of macromolecule biosynthetic process	37	TOB1, CEBPB, MXD4, CENPF, CYGB, PLK3, ZFP90, DDIT3, E2F1, ELF2, PHF19, ANG, UHRF1, H2AFX, HMGB2, BIRC5, ACER2, IL6, INHBB, SMAD7, MDM2, ATF3, NFIC, ZBTB7A, PLK1, HES2, LGR4, MEG3, DEPDC1, SUMO1, BTG2, TBL1XR1, E2F8, PIF1, HIST1H2AC, MXD3, AURKB	419	1357	51636	5.41587e-09	2.94407e-05	8.17796e-08
biological_process	GO:0007018	microtubule-based movement	15	KIF20A, CENPE, KIF2C, KIF18B, KIF4A, BLOC1S2, RACGAP1, KIF11, KIFC1, KIF22, NEFL, KIF15, KIF18A, KIF23, KIF14	441	202	52791	6.48814e-09	3.52695e-05	9.76995e-08
biological_process	GO:0051336	regulation of hydrolase activity	35	TBC1D3G, ECT2, CORO1C, PLXNB2, CYFIP2, ANG, GPX1, RACGAP1, UHRF1, HMGB2, BIRC5, ACER2, FAS, IL6, ASPH, PCNA, TRIAP1, SERPINF1, PLXNB3, PMAIP1, PPP2R2C, DEPDC1, DEPDC1B, DIABLO, GRHL3, RALGDS, RANGAP1, EPS8L2, TCEA1, SUMO1, ARHGEF39, TNFRSF10B, PTTG1, ARHGAP29, ARHGAP11A	421	1244	51749	7.21072e-09	3.91974e-05	1.0828e-07
biological_process	GO:0010629	negative regulation of gene expression	38	TOB1, CDKN1A, CEBPB, MXD4, CENPF, PLK3, ZFP90, DDIT3, E2F1, ELF2, PHF19, ANG, UHRF1, H2AFX, HMGB2, BIRC5, SMAD7, MDM2, ATF3, NFIC, ZBTB7A, SERPINF1, PLK1, HES2, LGR4, MEG3, DEPDC1, SFMBT2, SUMO1, BTG2, CHAC1, TBL1XR1, E2F8, HIST1H2AC, MXD3, CCNB1, AURKB, PTBP3	418	1447	51546	8.41395e-09	4.57382e-05	1.26001e-07
biological_process	GO:0032269	negative regulation of cellular protein metabolic process	30	TOB1, CDKN1A, CDKN2C, UBE2C, GADD45A, CORO1C, FBXO5, ANG, GPX1, BIRC5, ACER2, IGFBP3, FAS, IL6, MAD2L1, SMAD7, ATF3, TRIAP1, SERPINF1, PLK1, BUB1, BUB1B, TTK, BTG2, CHAC1, SH3BP5L, TNFRSF10B, CCNB1, PTTG1, CDC20	426	949	52044	9.32501e-09	5.06908e-05	1.3926e-07
cellular_component	GO:0044421	extracellular region part	68	ARPC5, CFL2, PRSS23, ADAMTS7, CMBL, RTN4RL1, DPYSL2, AK1, STOM, ALDH3A1, ACSL4, ICOSLG, PHLDA3, PLXNB2, FLRT2, GAMT, CYFIP2, ANG, GPX1, C1GALT1C1, RACGAP1, H2AFX, HMGB2, IGFBP3, FAS, IL6, IL11, INHBB, CD82, KITLG, ACHE, NEK2, NRF1, RRM2B, PCNA, SERPINF1, PGF, VPS13C, CDCA8, CEP55, BOLA2, RGMA, ACTA2, RAP2B, SCP2, SDF2, EPS8L2, LYNX1, VAMP2, TPM3, TUBA4A, XPC, BTG2, TTYH3, TXNDC5, PVRL4, HIST1H2AC…	388	3688	49305	9.97968e-09	5.42496e-05	1.48629e-07
biological_process	GO:0034453	microtubule anchoring	9	NDC80, SPAG5, CENPE, ECT2, RACGAP1, NEK2, CCNB1, KNSTRN, AURKB	447	42	52951	1.0185e-08	5.53659e-05	1.51273e-07
biological_process	GO:0071478	cellular response to radiation	13	CDKN1A, DDB2, GADD45A, ECT2, H2AFX, RDH11, PCNA, TRIAP1, POLH, XPC, AURKB, TP53INP1, CDC25A	443	144	52849	1.16771e-08	6.34767e-05	1.72961e-07
biological_process	GO:0045893	positive regulation of transcription, DNA-templated	37	CEBPB, KLF6, ZFP90, DDIT3, E2F1, ELF2, BLOC1S2, UHRF1, SERTAD1, HMGB2, HOXC13, IL6, IL11, SMAD7, MEF2D, ASPH, ATF3, NFIC, NRF1, TRIAP1, LGR4, MEG3, RGMA, GRHL3, EDA2R, CREB3L2, TCEA1, TOP2A, TBL1XR1, E2F8, PSRC1, KLF7, CCNA2, DYRK1B, CCPG1, TP53INP1, MICAL2	419	1412	51581	1.44881e-08	7.87576e-05	2.13435e-07
biological_process	GO:1903508	positive regulation of nucleic acid-templated transcription	37	CEBPB, KLF6, ZFP90, DDIT3, E2F1, ELF2, BLOC1S2, UHRF1, SERTAD1, HMGB2, HOXC13, IL6, IL11, SMAD7, MEF2D, ASPH, ATF3, NFIC, NRF1, TRIAP1, LGR4, MEG3, RGMA, GRHL3, EDA2R, CREB3L2, TCEA1, TOP2A, TBL1XR1, E2F8, PSRC1, KLF7, CCNA2, DYRK1B, CCPG1, TP53INP1, MICAL2	419	1412	51581	1.44881e-08	7.87576e-05	2.13435e-07
biological_process	GO:0007091	metaphase/anaphase transition of mitotic cell cycle	9	CENPE, UBE2C, FBXO5, MAD2L1, PLK1, BUB1, BUB1B, TTK, CDC20	447	45	52948	1.64433e-08	8.93857e-05	2.41583e-07
biological_process	GO:0051130	positive regulation of cellular component organization	31	ARPC4-TTLL3, ARPC5, CFL2, UBE2C, E2F1, STOM, CORO1C, PLXNB2, FLRT2, PHF19, GPX1, BIRC5, ARPIN, FAS, NEFL, NUSAP1, SERPINF1, PLK1, PMAIP1, SHTN1, EPS8L2, AURKA, SUMO1, PSRC1, NKD2, NRP1, CCNB1, NTN1, GDF15, ESPL1, CDC20	425	1036	51957	1.65532e-08	8.99834e-05	2.42543e-07
biological_process	GO:0044784	metaphase/anaphase transition of cell cycle	9	CENPE, UBE2C, FBXO5, MAD2L1, PLK1, BUB1, BUB1B, TTK, CDC20	447	46	52947	1.916e-08	0.000104154	2.79983e-07
biological_process	GO:0000281	mitotic cytokinesis	8	KIF20A, KIF4A, RACGAP1, NUSAP1, PLK1, ANLN, CEP55, KIF23	448	29	52964	2.0872e-08	0.00011346	3.04183e-07
biological_process	GO:0051784	negative regulation of nuclear division	10	UBE2C, FBXO5, MAD2L1, PLK1, BUB1, BUB1B, TTK, CCNB1, PTTG1, CDC20	446	68	52925	2.09859e-08	0.000114079	3.05024e-07
biological_process	GO:0032465	regulation of cytokinesis	11	CDKN1A, PLK3, ECT2, RACGAP1, STIL, AURKA, E2F8, PSRC1, AURKB, KIF23, KIF14	445	93	52900	2.1107e-08	0.000114738	3.05678e-07
biological_process	GO:0006357	regulation of transcription from RNA polymerase II promoter	42	TOB1, CEBPB, MXD4, PLK3, KLF6, ZFP90, DDIT3, E2F1, ELF2, PHF19, FBXO5, UHRF1, SERTAD1, HMGB2, HOXC13, IL6, IL11, SMAD7, MDM2, MEF2D, ATF3, NFIC, NRF1, PCNA, ZBTB7A, TRIAP1, PLK1, RGMA, ANKRA2, GRHL3, CREB3L2, TCEA1, ZNF354A, TOP2A, BTG2, TBL1XR1, E2F8, KLF7, AURKB, CCPG1, MICAL2, CDK1	414	1777	51216	2.11433e-08	0.000114935	3.05678e-07
biological_process	GO:0009890	negative regulation of biosynthetic process	37	TOB1, CEBPB, MXD4, CENPF, CYGB, PLK3, ZFP90, DDIT3, E2F1, ELF2, PHF19, ANG, UHRF1, H2AFX, HMGB2, BIRC5, ACER2, IL6, INHBB, SMAD7, MDM2, ATF3, NFIC, ZBTB7A, PLK1, HES2, LGR4, MEG3, DEPDC1, SUMO1, BTG2, TBL1XR1, E2F8, PIF1, HIST1H2AC, MXD3, AURKB	419	1435	51558	2.15149e-08	0.000116955	3.10225e-07
biological_process	GO:0033046	negative regulation of sister chromatid segregation	9	UBE2C, MAD2L1, PLK1, BUB1, BUB1B, TTK, CCNB1, PTTG1, CDC20	447	47	52946	2.22552e-08	0.000120979	3.17418e-07
biological_process	GO:0033048	negative regulation of mitotic sister chromatid segregation	9	UBE2C, MAD2L1, PLK1, BUB1, BUB1B, TTK, CCNB1, PTTG1, CDC20	447	47	52946	2.22552e-08	0.000120979	3.17418e-07
biological_process	GO:0051985	negative regulation of chromosome segregation	9	UBE2C, MAD2L1, PLK1, BUB1, BUB1B, TTK, CCNB1, PTTG1, CDC20	447	47	52946	2.22552e-08	0.000120979	3.17418e-07
biological_process	GO:2000816	negative regulation of mitotic sister chromatid separation	9	UBE2C, MAD2L1, PLK1, BUB1, BUB1B, TTK, CCNB1, PTTG1, CDC20	447	47	52946	2.22552e-08	0.000120979	3.17418e-07
biological_process	GO:0007399	nervous system development	49	ARPC5, CDKN2C, TACC3, CEBPB, DPYSL4, TRIM3, RTN4RL1, DPYSL2, E2F1, ECT2, ACSL4, PLXNB2, FLRT2, KIF4A, ASPM, BLOC1S2, GRIN2C, RACGAP1, H2AFX, HMGB2, HOXA3, IL6, MEF2D, KITLG, ACHE, NEFL, NINJ1, SERPINF1, PLXNB3, MEG3, SULF2, RGMA, SHTN1, GRHL3, CCDC14, STIL, SMN1, AURKA, TPM3, WEE1, BTG2, CHAC1, KLF7, NRP1, ARHGAP11B, NTN1, CDK1, CDC20, KIF14	407	2283	50710	2.23057e-08	0.000121254	3.17418e-07
biological_process	GO:1902680	positive regulation of RNA biosynthetic process	37	CEBPB, KLF6, ZFP90, DDIT3, E2F1, ELF2, BLOC1S2, UHRF1, SERTAD1, HMGB2, HOXC13, IL6, IL11, SMAD7, MEF2D, ASPH, ATF3, NFIC, NRF1, TRIAP1, LGR4, MEG3, RGMA, GRHL3, EDA2R, CREB3L2, TCEA1, TOP2A, TBL1XR1, E2F8, PSRC1, KLF7, CCNA2, DYRK1B, CCPG1, TP53INP1, MICAL2	419	1439	51554	2.3025e-08	0.000125164	3.26798e-07
biological_process	GO:0000003	reproduction	29	CEBPB, SGOL2, E2F1, ACSL4, ASPM, GAMT, FBXO5, RACGAP1, H2AFX, HMGB2, INHBB, KIFC1, KITLG, MKI67, NEK2, SERPINF1, PLK1, LGR4, SPATA7, CYP26B1, AURKA, TOP2A, CCNB1, PTTG1, ESPL1, CDK1, CDC20, NCAPD2, CDC25C	427	938	52055	2.71757e-08	0.000147727	3.84705e-07
molecular_function	GO:0003774	motor activity	12	KIF20A, CENPE, KIF2C, KIF18B, KIF4A, KIF11, KIFC1, KIF22, KIF15, KIF18A, KIF23, KIF14	444	126	52867	3.05388e-08	0.000166009	4.30075e-07
biological_process	GO:0051781	positive regulation of cell division	12	UBE2C, ECT2, RACGAP1, BIRC5, NUSAP1, PGF, PLK1, AURKA, AURKB, KIF23, ESPL1, KIF14	444	126	52867	3.05388e-08	0.000166009	4.30075e-07
biological_process	GO:0009896	positive regulation of catabolic process	18	TOB1, UBE2C, PLK3, RNF19B, RNF19A, FBXO22, FBXO5, SMAD7, MDM2, PLK1, AURKA, SUMO1, BTG2, NKD2, CCNB1, TP53INP1, CDK1, CDC20	438	356	52637	3.08015e-08	0.000167437	4.32654e-07
biological_process	GO:0051493	regulation of cytoskeleton organization	19	ARPC4-TTLL3, ARPC5, SPAG5, CFL2, ECT2, TPX2, RACGAP1, ARPIN, KIF11, NEK2, PLK1, GRHL3, AURKA, BORA, PSRC1, CCNB1, CCNF, KNSTRN, AURKB	437	402	52591	3.0913e-08	0.000168043	4.33101e-07
biological_process	GO:0070997	neuron death	16	CEBPB, DPYSL4, DDIT3, GCLM, GPX1, BIRC5, FAS, IL6, NEFL, SERPINF1, PMAIP1, DIABLO, BTG2, BTBD10, NRP1, KIF14	440	271	52722	3.21614e-08	0.000174829	4.49433e-07
biological_process	GO:0044712	single-organism catabolic process	33	PLA2G4B, CENPE, UBE2C, ADAMTS7, SPATA18, STOM, LSM4, FBXO5, APOBEC3C, GPX1, HMMR, INPP1, MAD2L1, ACHE, PLK1, NUDT15, PRKAB1, PRODH, CYP26B1, TIGAR, BCAT1, LDAH, SCP2, BUB1, BUB1B, TTK, UBE2G2, UNG, DERL1, SESN2, STBD1, TP53INP1, CDC20	423	1197	51796	3.31523e-08	0.000180216	4.62092e-07
biological_process	GO:0010557	positive regulation of macromolecule biosynthetic process	39	CEBPB, KLF6, ZFP90, DDIT3, E2F1, ELF2, BLOC1S2, UHRF1, SERTAD1, HMGB2, HOXC13, IL6, IL11, SMAD7, MEF2D, KITLG, ASPH, ATF3, NFIC, NRF1, PCNA, TRIAP1, LGR4, MEG3, RGMA, GRHL3, EDA2R, CREB3L2, TCEA1, TOP2A, TBL1XR1, E2F8, PSRC1, KLF7, CCNA2, DYRK1B, CCPG1, TP53INP1, MICAL2	417	1608	51385	3.92031e-08	0.000213108	5.45033e-07
biological_process	GO:0044281	small molecule metabolic process	51	PLA2G4B, ABHD14A-ACY1, CYGB, COX15, HACD2, AK1, ACSL4, FDXR, ISCU, GAMT, GCLM, APOBEC3C, GPX1, HMMR, ACER2, IGFBP3, IL6, INPP1, ITPK1, ACHE, ATF3, NDUFA5, RRM2B, AK3, RDH11, PMAIP1, RETSAT, PPP1R3C, NADSYN1, NUDT15, PRKAB1, SULF2, PRODH, CYP26B1, ADCK3, TIGAR, BCAT1, SCP2, NME1-NME2, VAMP2, TM7SF2, UCP2, SLC35A2, UNG, ARSJ, TBL1XR1, SESN2, EBPL, HPDL, SLC7A6, TP53I3	405	2483	50510	4.4475e-08	0.000241766	6.1675e-07
biological_process	GO:0030071	regulation of mitotic metaphase/anaphase transition	9	CENPE, UBE2C, MAD2L1, PLK1, BUB1, BUB1B, TTK, CCNB1, CDC20	447	52	52941	4.50611e-08	0.000244952	6.23288e-07
biological_process	GO:2000113	negative regulation of cellular macromolecule biosynthetic process	34	TOB1, CEBPB, MXD4, CENPF, PLK3, ZFP90, DDIT3, E2F1, ELF2, PHF19, ANG, UHRF1, H2AFX, HMGB2, BIRC5, ACER2, SMAD7, MDM2, ATF3, NFIC, ZBTB7A, PLK1, HES2, LGR4, MEG3, DEPDC1, SUMO1, BTG2, TBL1XR1, E2F8, PIF1, HIST1H2AC, MXD3, AURKB	422	1282	51711	4.75908e-08	0.000258704	6.56609e-07
biological_process	GO:0031327	negative regulation of cellular biosynthetic process	36	TOB1, CEBPB, MXD4, CENPF, PLK3, ZFP90, DDIT3, E2F1, ELF2, PHF19, ANG, UHRF1, H2AFX, HMGB2, BIRC5, ACER2, IL6, INHBB, SMAD7, MDM2, ATF3, NFIC, ZBTB7A, PLK1, HES2, LGR4, MEG3, DEPDC1, SUMO1, BTG2, TBL1XR1, E2F8, PIF1, HIST1H2AC, MXD3, AURKB	420	1417	51576	4.91064e-08	0.000266942	6.75804e-07
biological_process	GO:1902099	regulation of metaphase/anaphase transition of cell cycle	9	CENPE, UBE2C, MAD2L1, PLK1, BUB1, BUB1B, TTK, CCNB1, CDC20	447	53	52940	5.14788e-08	0.000279839	7.06663e-07
biological_process	GO:0051321	meiotic cell cycle	14	SGOL2, ASPM, FBXO5, H2AFX, MKI67, NEK2, PLK1, CYP26B1, AURKA, TOP2A, PTTG1, ESPL1, CDC20, NCAPD2	442	203	52790	5.39701e-08	0.000293381	7.38996e-07
biological_process	GO:0051438	regulation of ubiquitin-protein transferase activity	12	UBE2C, FBXO5, UBE2S, MAD2L1, SMAD7, PLK1, BUB1, BUB1B, TTK, CCNB1, CDK1, CDC20	444	134	52859	5.4913e-08	0.000298507	7.50018e-07
biological_process	GO:0032436	positive regulation of proteasomal ubiquitin-dependent protein catabolic process	10	PLK3, RNF19B, RNF19A, FBXO22, SMAD7, MDM2, PLK1, AURKA, SUMO1, NKD2	446	77	52916	5.59136e-08	0.000303946	7.61771e-07
biological_process	GO:0031099	regeneration	13	PTPRU, CDKN1A, CEBPB, RTN4RL1, GPX1, MKI67, NEFL, NINJ1, NRF1, PGF, UCP2, CCNA2, CCNB1	443	168	52825	5.74287e-08	0.000312182	7.80456e-07
biological_process	GO:0022411	cellular component disassembly	25	CFL2, KIF2C, ADAMTS7, MRPL10, PLK3, SPATA18, KIF18B, STOM, MRPS27, LSM4, HMGB2, LMNB1, ASPH, PLK1, TIGAR, AURKA, TOP2A, KIF18A, CCNB1, CCNB2, NEK9, AURKB, MICAL2, CDK1, KIF14	431	739	52254	6.12164e-08	0.000332772	8.29856e-07
biological_process	GO:0051348	negative regulation of transferase activity	17	CDKN1A, CDKN2C, UBE2C, GADD45A, CORO1C, FBXO5, IL6, MAD2L1, SMAD7, PLK1, BUB1, BUB1B, TTK, PIF1, SH3BP5L, CCNB1, CDC20	439	330	52663	6.42323e-08	0.000349167	8.68574e-07
biological_process	GO:0002376	immune system process	51	ARPC5, CDKN1A, TACC3, CEBPB, CENPE, KIF2C, RNF19B, CRIP2, STOM, ICOSLG, KIF4A, FYB, LSM4, ZNF385A, CYFIP2, APOBEC3C, ANG, GPX1, GRIN2C, RACGAP1, HMGB2, HOXA3, FAS, IL6, KIF11, KIF22, MDM2, KITLG, NEFL, ZBTB7A, PMAIP1, ANLN, GPATCH4, LGR4, CYP26B1, KIF15, VAMP2, TAP1, TCEA1, TOP2A, SUMO1, UNG, NLRX1, ULBP1, KIF18A, TNFSF9, SLC7A6, CCNB2, KIF23, CD70, PTBP3	405	2520	50473	6.48851e-08	0.000352716	8.75225e-07
molecular_function	GO:0046983	protein dimerization activity	31	CEBPB, CENPA, MXD4, CENPF, DDIT3, ECT2, STOM, GAMT, GCLM, ANG, GTF2A1, H2AFX, BIRC5, INHBB, MAD2L1, MEF2D, ACHE, ATF3, NEFL, NRF1, PGF, HES2, TAP1, TOP2A, E2F8, MTERF2, PVRL4, HIST1H2AC, MXD3, SLC4A11, TP53I3	425	1111	51882	7.29272e-08	0.000396432	9.81268e-07
biological_process	GO:0045732	positive regulation of protein catabolic process	15	UBE2C, PLK3, RNF19B, RNF19A, FBXO22, FBXO5, SMAD7, MDM2, PLK1, AURKA, SUMO1, NKD2, CCNB1, CDK1, CDC20	441	249	52744	7.69224e-08	0.00041815	1.03247e-06
biological_process	GO:0009719	response to endogenous stimulus	39	PTPRU, TOB1, CDKN1A, CEBPB, ADAMTS7, OSBPL8, KLF6, DPYSL2, E2F1, ALDH3A1, ANG, GPX1, GRIN2C, HMGB2, FAS, IL6, INHBB, SMAD7, MDM2, KITLG, ASPH, NEFL, NRF1, SERPINF1, PGF, PRKAB1, SULF2, RGMA, TIGAR, RANGAP1, SNRPN, AURKA, VAMP2, UCP2, BTG2, SHCBP1, SESN2, CCNA2, GDF15	417	1655	51338	8.02617e-08	0.000436302	1.07464e-06
biological_process	GO:0040011	locomotion	40	PTPRU, ARPC5, DPYSL4, CYGB, OSBPL8, DPYSL2, CORO1C, PLXNB2, FLRT2, KIF4A, ASPM, ANG, GPX1, GRIN2C, HMGB2, ARPIN, IGFBP3, IL6, SMAD7, KITLG, NEFL, SERPINF1, PLXNB3, ANLN, SLC52A1, MEG3, DEPDC1B, RGMA, SHTN1, RAP2B, ZFAND5, FAM83D, ARHGEF39, KLF7, NRP1, SLC7A6, NTN1, TP53INP1, CDK1, KIF14	416	1730	51263	8.54081e-08	0.000464278	1.13916e-06
biological_process	GO:0045839	negative regulation of mitotic nuclear division	9	UBE2C, MAD2L1, PLK1, BUB1, BUB1B, TTK, CCNB1, PTTG1, CDC20	447	57	52936	8.56499e-08	0.000465593	1.13916e-06
biological_process	GO:0042060	wound healing	24	CENPE, KIF2C, KLF6, DGKA, KIF4A, GPX1, C1GALT1C1, RACGAP1, IL6, ITPK1, KIF11, KIFC1, KIF22, NINJ1, AK3, KIF15, GRHL3, RAP2B, TUBA4A, WEE1, KIF18A, CCNB1, SLC7A6, KIF23	432	696	52297	8.57098e-08	0.000465918	1.13916e-06
biological_process	GO:0033365	protein localization to organelle	26	TOB1, CDKN1A, TACC3, CENPA, OSBPL8, E2F1, ECT2, FYB, IL6, KPNA2, MDM2, PLK1, PMAIP1, VPS13C, SPDL1, SPATA7, PEX19, STIL, SSR3, AURKA, BUB1B, SUMO1, FAM83D, NRP1, AURKB, CDK1	430	813	52180	8.87607e-08	0.000482503	1.17684e-06
biological_process	GO:0097285	cell-type specific apoptotic process	19	CEBPB, DDIT3, E2F1, E2F2, GCLM, GPX1, BIRC5, FAS, IL6, IL11, KITLG, NEFL, PMAIP1, DIABLO, TIGAR, BTG2, NRP1, AURKB, KIF14	437	433	52560	8.98736e-08	0.000488553	1.18869e-06
biological_process	GO:0051704	multi-organism process	48	CEBPB, CENPA, E2F1, STOM, ACSL4, LSM4, ASPM, GAMT, FBXO5, APOBEC3C, ANG, GPX1, RACGAP1, GTF2A1, H2AFX, HMGB2, IL6, INHBB, KIFC1, KPNA2, MDM2, NRF1, PGF, PMAIP1, SLC52A1, LGR4, SPATA7, CYP26B1, ACTA2, AURKA, TAP1, TCEA1, BUB1, TOP2A, SUMO1, UCP2, UNG, DERL1, NLRX1, PVRL4, PPM1D, RNGTT, CCNA2, CCNB1, C9orf69, PTTG1, CDK1, CDC25C	408	2298	50695	9.34555e-08	0.000508024	1.23307e-06
biological_process	GO:0043086	negative regulation of catalytic activity	26	CDKN1A, CDKN2C, UBE2C, GADD45A, CORO1C, FBXO5, GPX1, BIRC5, FAS, IL6, MAD2L1, SMAD7, TRIAP1, SERPINF1, PLK1, PLXNB3, BUB1, BUB1B, TTK, PIF1, SH3BP5L, ANP32E, TNFRSF10B, CCNB1, PTTG1, CDC20	430	816	52177	9.49377e-08	0.000516081	1.24959e-06
biological_process	GO:0034644	cellular response to UV	9	CDKN1A, DDB2, PCNA, TRIAP1, POLH, XPC, AURKB, TP53INP1, CDC25A	447	58	52935	9.67424e-08	0.000525892	1.27027e-06
biological_process	GO:0044765	single-organism transport	67	ARPC5, TOB1, CDKN1A, TACC3, TGOLN2, CYGB, OSBPL8, RNF19B, COX15, DDIT3, DPYSL2, E2F1, ECT2, STOM, ACSL4, ARL6IP1, CORO1C, KIF4A, FYB, CYFIP2, NSG1, SLCO4A1, BLOC1S2, ANG, GRIN2C, RACGAP1, BIRC5, IL6, IL11, INHBB, KPNA2, ACHE, ASPH, NEFL, ZDHHC9, TRIAP1, PMAIP1, SEPT5, VPS13C, SLC52A1, TMEM63B, LGR4, MEG3, PEX19, RANGAP1, SCP2, CREB3L2, SSR3, VAMP2, TAP1, TUBA4A, SLC35E2B, UBE2G2, SUMO1, UCP2, SLC…	389	3846	49147	1.04883e-07	0.000570142	1.37384e-06
biological_process	GO:0016477	cell migration	31	PTPRU, ARPC5, CYGB, OSBPL8, CORO1C, PLXNB2, FLRT2, ASPM, ANG, GPX1, HMGB2, ARPIN, IGFBP3, IL6, SMAD7, KITLG, SERPINF1, PLXNB3, ANLN, DEPDC1B, SHTN1, RAP2B, ZFAND5, FAM83D, ARHGEF39, NRP1, SLC7A6, NTN1, TP53INP1, CDK1, KIF14	425	1131	51862	1.05809e-07	0.000575179	1.38264e-06
biological_process	GO:0009653	anatomical structure morphogenesis	53	ARPC5, CEBPB, DPYSL4, CFL2, DPYSL2, ECT2, CORO1C, PHLDA3, PLXNB2, FLRT2, KIF4A, GAMT, ZNF385A, ANG, GPX1, GRIN2C, C1GALT1C1, HOXA3, HOXC13, ARPIN, IL6, SMAD7, MEF2D, KITLG, MKI67, ASPH, NEFL, NFIC, NINJ1, SERPINF1, PGF, PLXNB3, LGR4, MEG3, CYP26B1, RGMA, SHTN1, GRHL3, ACTA2, STIL, AURKA, WEE1, ZFAND5, E2F8, FAM83D, KLF7, NRP1, DYRK1B, NTN1, GDF15, MICAL2, KIF14, PTBP3	403	2722	50271	1.13167e-07	0.000615178	1.47491e-06
biological_process	GO:0051345	positive regulation of hydrolase activity	26	TBC1D3G, ECT2, CORO1C, CYFIP2, ANG, RACGAP1, UHRF1, HMGB2, ACER2, FAS, ASPH, PCNA, PMAIP1, DEPDC1, DEPDC1B, DIABLO, GRHL3, RALGDS, RANGAP1, EPS8L2, TCEA1, SUMO1, ARHGEF39, TNFRSF10B, ARHGAP29, ARHGAP11A	430	824	52169	1.13413e-07	0.000616511	1.47491e-06
biological_process	GO:0071214	cellular response to abiotic stimulus	15	CDKN1A, DDB2, GADD45A, ECT2, H2AFX, FAS, RDH11, PCNA, TRIAP1, POLH, XPC, TNFRSF10B, AURKB, TP53INP1, CDC25A	441	261	52732	1.33057e-07	0.0007233	1.72625e-06
biological_process	GO:0032880	regulation of protein localization	27	CDKN1A, TACC3, SPAG5, PLK3, E2F1, ECT2, STOM, ASTN2, ANG, RACGAP1, BIRC5, IL6, INHBB, ACHE, ASPH, NEK2, PMAIP1, LGR4, RANGAP1, VAMP2, UBE2G2, SUMO1, UCP2, BORA, NKD2, CCNB1, KNSTRN	429	892	52101	1.34087e-07	0.000728898	1.73547e-06
biological_process	GO:0045934	negative regulation of nucleobase-containing compound metabolic process	34	TOB1, CEBPB, MXD4, CENPF, PLK3, ZFP90, DDIT3, E2F1, ELF2, PHF19, UHRF1, H2AFX, HMGB2, BIRC5, SMAD7, MDM2, ATF3, NFIC, ZBTB7A, PLK1, HES2, LGR4, MEG3, DEPDC1, TIGAR, SUMO1, BTG2, TBL1XR1, E2F8, PIF1, HIST1H2AC, MXD3, AURKB, PTBP3	422	1351	51642	1.5345e-07	0.000834154	1.98136e-06
biological_process	GO:0050793	regulation of developmental process	44	TOB1, CEBPB, CENPF, ADAMTS7, DDIT3, DPYSL2, E2F1, ECT2, CORO1C, PLXNB2, FLRT2, ASPM, GAMT, ZNF385A, FBXO22, NUPR1, GPX1, HMGB2, ARPIN, IGFBP3, FAS, IL6, SMAD7, KITLG, NEFL, ZBTB7A, SERPINF1, PGF, LGR4, MEG3, CYP26B1, RGMA, SHTN1, GRHL3, AURKA, YPEL3, TNFSF9, NRP1, CCNB1, NTN1, GDF15, CDK1, CDC20, KIF14	412	2064	50929	1.62796e-07	0.000884957	2.09705e-06
biological_process	GO:0045861	negative regulation of proteolysis	17	UBE2C, GPX1, BIRC5, FAS, IL6, MAD2L1, TRIAP1, SERPINF1, PLK1, BUB1, BUB1B, TTK, CHAC1, TNFRSF10B, CCNB1, PTTG1, CDC20	439	355	52638	1.65611e-07	0.000900259	2.12827e-06
molecular_function	GO:0019787	ubiquitin-like protein transferase activity	17	UBE2F-SCLY, TRIM3, UBE2C, RNF19B, MIB2, DDB2, RNF19A, FBXO22, UBE2S, UHRF1, BIRC5, MDM2, G2E3, PJA1, UBE2G2, SUMO1, TRAF4	439	356	52637	1.71722e-07	0.000933482	2.19967e-06
cellular_component	GO:0005739	mitochondrion	38	PLA2G4B, MRPL10, SPATA18, COX15, DPYSL2, STOM, ACSL4, FDXR, MRPS27, ISCU, BLOC1S2, GPX1, NDUFA5, RRM2B, AK3, TRIAP1, PMAIP1, ATAD3A, PRODH, DIABLO, ADCK3, TIGAR, BCAT1, CCDC90B, SCP2, TAP1, FAM72A, UCP2, UNG, NLRX1, PIF1, MTERF2, SESN2, HSDL1, FAM136A, DCAF5, SLC25A46, CDK1	418	1636	51357	1.71975e-07	0.000934859	2.19967e-06
biological_process	GO:0033044	regulation of chromosome organization	14	CENPE, UBE2C, PHF19, FBXO5, MAD2L1, PLK1, BUB1, BUB1B, TTK, PIF1, CCNB1, PTTG1, ESPL1, CDC20	442	226	52767	1.74792e-07	0.000950169	2.23007e-06
biological_process	GO:0009605	response to external stimulus	50	ARPC5, CDKN1A, CEBPB, DPYSL4, ADAMTS7, GADD45A, DDIT3, DPYSL2, STOM, ALDH3A1, ACSL4, FLRT2, KIF4A, LSM4, FBXO22, APOBEC3C, ANG, GPX1, GRIN2C, HMGB2, FAS, IL6, INHBB, KITLG, ATF3, NEFL, NRF1, RDH11, SERPINF1, PLXNB3, PMAIP1, MEG3, PRKAB1, RGMA, TIGAR, SHTN1, ACTA2, VAMP2, UCP2, XPC, BTG2, NLRX1, PPM1D, KLF7, TNFRSF10B, NRP1, CCNB1, STBD1, NTN1, TP53INP1	406	2498	50495	1.75173e-07	0.00095224	2.23007e-06
biological_process	GO:0051988	regulation of attachment of spindle microtubules to kinetochore	6	SPAG5, ECT2, RACGAP1, NEK2, CCNB1, KNSTRN	450	11	52982	1.7684e-07	0.0009613	2.24603e-06
biological_process	GO:0090224	regulation of spindle organization	7	TPX2, PLK1, AURKA, BORA, PSRC1, CCNB1, AURKB	449	24	52969	1.83922e-07	0.000999801	2.33054e-06
biological_process	GO:1901800	positive regulation of proteasomal protein catabolic process	10	PLK3, RNF19B, RNF19A, FBXO22, SMAD7, MDM2, PLK1, AURKA, SUMO1, NKD2	446	90	52903	1.90922e-07	0.00103785	2.41362e-06
biological_process	GO:0007094	mitotic spindle assembly checkpoint	8	UBE2C, MAD2L1, PLK1, BUB1, BUB1B, TTK, CCNB1, CDC20	448	42	52951	1.95245e-07	0.00106135	2.45683e-06
biological_process	GO:1904667	negative regulation of ubiquitin protein ligase activity	8	UBE2C, MAD2L1, PLK1, BUB1, BUB1B, TTK, CCNB1, CDC20	448	42	52951	1.95245e-07	0.00106135	2.45683e-06
biological_process	GO:0051253	negative regulation of RNA metabolic process	32	TOB1, CEBPB, MXD4, CENPF, PLK3, ZFP90, DDIT3, E2F1, ELF2, PHF19, UHRF1, H2AFX, HMGB2, BIRC5, SMAD7, MDM2, ATF3, NFIC, ZBTB7A, PLK1, HES2, LGR4, MEG3, DEPDC1, SUMO1, BTG2, TBL1XR1, E2F8, HIST1H2AC, MXD3, AURKB, PTBP3	424	1235	51758	2.08566e-07	0.00113377	2.6184e-06
biological_process	GO:0008285	negative regulation of cell proliferation	22	PTPRU, TOB1, CDKN1A, CDKN2C, CDKN3, CEBPB, MXD4, E2F1, NUPR1, SESN1, ANG, IGFBP3, IL6, ASPH, SERPINF1, PMAIP1, MEG3, BTG2, HIST1H2AC, PPM1D, TP53INP1, TP53I11	434	621	52372	2.17472e-07	0.00118218	2.72391e-06
biological_process	GO:0009411	response to UV	11	CDKN1A, DDB2, GPX1, PCNA, TRIAP1, PMAIP1, POLH, XPC, AURKB, TP53INP1, CDC25A	445	122	52871	2.24245e-07	0.00121899	2.80229e-06
biological_process	GO:0071173	spindle assembly checkpoint	8	UBE2C, MAD2L1, PLK1, BUB1, BUB1B, TTK, CCNB1, CDC20	448	43	52950	2.25371e-07	0.00122512	2.80347e-06
biological_process	GO:1904666	regulation of ubiquitin protein ligase activity	8	UBE2C, MAD2L1, PLK1, BUB1, BUB1B, TTK, CCNB1, CDC20	448	43	52950	2.25371e-07	0.00122512	2.80347e-06
biological_process	GO:0051261	protein depolymerization	10	CFL2, KIF2C, KIF18B, ASPH, AURKA, KIF18A, CCNB1, AURKB, MICAL2, KIF14	446	92	52901	2.26902e-07	0.00123344	2.81607e-06
biological_process	GO:0051172	negative regulation of nitrogen compound metabolic process	35	TOB1, CEBPB, MXD4, CENPF, PLK3, ZFP90, DDIT3, E2F1, ELF2, PHF19, ANG, UHRF1, H2AFX, HMGB2, BIRC5, SMAD7, MDM2, ATF3, NFIC, ZBTB7A, PLK1, HES2, LGR4, MEG3, DEPDC1, TIGAR, SUMO1, BTG2, TBL1XR1, E2F8, PIF1, HIST1H2AC, MXD3, AURKB, PTBP3	421	1445	51548	2.30032e-07	0.00125045	2.84841e-06
biological_process	GO:0031328	positive regulation of cellular biosynthetic process	39	CEBPB, KLF6, ZFP90, DDIT3, E2F1, ELF2, BLOC1S2, UHRF1, SERTAD1, HMGB2, HOXC13, IL6, IL11, SMAD7, MEF2D, KITLG, ASPH, ATF3, NFIC, NRF1, PCNA, TRIAP1, LGR4, MEG3, RGMA, GRHL3, EDA2R, CREB3L2, TCEA1, TOP2A, TBL1XR1, E2F8, PSRC1, KLF7, CCNA2, DYRK1B, CCPG1, TP53INP1, MICAL2	417	1731	51262	2.40091e-07	0.00130513	2.96621e-06
biological_process	GO:0009314	response to radiation	19	CDKN1A, PLK3, DDB2, GADD45A, ECT2, GPX1, H2AFX, RDH11, PCNA, TRIAP1, PMAIP1, POLH, TIGAR, XPC, PPM1D, TICRR, AURKB, TP53INP1, CDC25A	437	465	52528	2.46501e-07	0.00133998	3.0385e-06
biological_process	GO:1903507	negative regulation of nucleic acid-templated transcription	31	TOB1, CEBPB, MXD4, CENPF, PLK3, ZFP90, DDIT3, E2F1, ELF2, PHF19, UHRF1, H2AFX, HMGB2, BIRC5, SMAD7, MDM2, ATF3, NFIC, ZBTB7A, PLK1, HES2, LGR4, MEG3, DEPDC1, SUMO1, BTG2, TBL1XR1, E2F8, HIST1H2AC, MXD3, AURKB	425	1181	51812	2.57949e-07	0.00140221	3.17242e-06
biological_process	GO:0045841	negative regulation of mitotic metaphase/anaphase transition	8	UBE2C, MAD2L1, PLK1, BUB1, BUB1B, TTK, CCNB1, CDC20	448	44	52949	2.59318e-07	0.00140965	3.17489e-06
biological_process	GO:0071174	mitotic spindle checkpoint	8	UBE2C, MAD2L1, PLK1, BUB1, BUB1B, TTK, CCNB1, CDC20	448	44	52949	2.59318e-07	0.00140965	3.17489e-06
biological_process	GO:0050878	regulation of body fluid levels	23	CENPE, KIF2C, DGKA, KIF4A, ZNF385A, C1GALT1C1, RACGAP1, IL6, ITPK1, KIF11, KIFC1, KIF22, AK3, CYP26B1, KIF15, GRHL3, RAP2B, VAMP2, TUBA4A, WEE1, KIF18A, SLC7A6, KIF23	433	687	52306	2.73969e-07	0.0014893	3.34673e-06
biological_process	GO:1902100	negative regulation of metaphase/anaphase transition of cell cycle	8	UBE2C, MAD2L1, PLK1, BUB1, BUB1B, TTK, CCNB1, CDC20	448	45	52948	2.97469e-07	0.00161704	3.62565e-06
biological_process	GO:0042327	positive regulation of phosphorylation	28	CDKN1A, CENPE, OSBPL8, GADD45A, ECT2, TPX2, ANG, GRIN2C, IGFBP3, IL6, IL11, INHBB, KITLG, NEFL, PLK1, TIGAR, RAP2B, EDA2R, STIL, TTK, BTBD10, PSRC1, NRP1, CCNB1, GDF15, TRAF4, CDK1, KIF14	428	999	51994	3.25542e-07	0.00176965	3.95894e-06
biological_process	GO:1902679	negative regulation of RNA biosynthetic process	31	TOB1, CEBPB, MXD4, CENPF, PLK3, ZFP90, DDIT3, E2F1, ELF2, PHF19, UHRF1, H2AFX, HMGB2, BIRC5, SMAD7, MDM2, ATF3, NFIC, ZBTB7A, PLK1, HES2, LGR4, MEG3, DEPDC1, SUMO1, BTG2, TBL1XR1, E2F8, HIST1H2AC, MXD3, AURKB	425	1196	51797	3.33508e-07	0.00181295	4.04676e-06
biological_process	GO:0071482	cellular response to light stimulus	10	CDKN1A, DDB2, RDH11, PCNA, TRIAP1, POLH, XPC, AURKB, TP53INP1, CDC25A	446	97	52896	3.43679e-07	0.00186824	4.15164e-06
biological_process	GO:0051444	negative regulation of ubiquitin-protein transferase activity	10	UBE2C, FBXO5, MAD2L1, SMAD7, PLK1, BUB1, BUB1B, TTK, CCNB1, CDC20	446	97	52896	3.43679e-07	0.00186824	4.15164e-06
cellular_component	GO:0005576	extracellular region	72	PLA2G4B, ARPC5, CFL2, PRSS23, ADAMTS7, CMBL, RTN4RL1, DPYSL2, AK1, STOM, ALDH3A1, ACSL4, VWCE, ICOSLG, PHLDA3, PLXNB2, FLRT2, GAMT, CYFIP2, ANG, GPX1, C1GALT1C1, RACGAP1, H2AFX, HMGB2, IGFBP3, FAS, IL6, IL11, INHBB, CD82, KITLG, ACHE, NEK2, NRF1, RRM2B, PCNA, SERPINF1, PGF, VPS13C, CDCA8, CEP55, BOLA2, THSD1, RGMA, ACTA2, RAP2B, SCP2, SDF2, EPS8L2, LYNX1, VAMP2, TPM3, TUBA4A, XPC, BTG2, ARSJ, TTY…	384	4395	48598	3.60854e-07	0.0019616	4.34945e-06
biological_process	GO:0051352	negative regulation of ligase activity	10	UBE2C, FBXO5, MAD2L1, SMAD7, PLK1, BUB1, BUB1B, TTK, CCNB1, CDC20	446	98	52895	3.7244e-07	0.00202459	4.47917e-06
biological_process	GO:0045595	regulation of cell differentiation	34	TOB1, CEBPB, ADAMTS7, DDIT3, DPYSL2, E2F1, ECT2, CORO1C, PLXNB2, FLRT2, ASPM, ZNF385A, FBXO22, HMGB2, IGFBP3, FAS, IL6, SMAD7, KITLG, NEFL, ZBTB7A, SERPINF1, MEG3, CYP26B1, RGMA, SHTN1, AURKA, TNFSF9, NRP1, NTN1, GDF15, CDK1, CDC20, KIF14	422	1408	51585	3.78647e-07	0.00205832	4.54376e-06
biological_process	GO:0045184	establishment of protein localization	41	C15orf38-AP3S2, KIF20A, TOB1, CDKN1A, TACC3, TRIM3, CENPF, PLK3, RNF19B, E2F1, ECT2, STOM, ARL6IP1, CORO1C, FYB, ANG, BIRC5, IL6, INHBB, KPNA2, MDM2, ACHE, ASPH, ZDHHC9, PLK1, PMAIP1, VPS13C, CEP55, LGR4, GOPC, PEX19, RANGAP1, SSR3, VAMP2, TAP1, UBE2G2, UCP2, DERL1, KIF18A, NKD2, KIF14	415	1906	51087	3.9651e-07	0.00215543	4.74765e-06
biological_process	GO:0051439	regulation of ubiquitin-protein ligase activity involved in mitotic cell cycle	10	UBE2C, FBXO5, MAD2L1, PLK1, BUB1, BUB1B, TTK, CCNB1, CDK1, CDC20	446	99	52894	4.03266e-07	0.00219215	4.81792e-06
biological_process	GO:0071310	cellular response to organic substance	45	PLA2G4B, TOB1, CDKN1A, CEBPB, ADAMTS7, OSBPL8, KLF6, DDIT3, E2F1, ECT2, GRIN2C, CDIP1, HMGB2, BIRC5, IL6, INHBB, KPNA2, SMAD7, MDM2, KITLG, ATF3, NEFL, SERPINF1, PGF, MEG3, PRKAB1, SULF2, CYP26B1, RGMA, RALGDS, RANGAP1, EDA2R, SDF2, CREB3L2, VAMP2, UBE2G2, SUMO1, UCP2, DERL1, SHCBP1, NRP1, CCNB1, TP53INP1, GDF15, CD70	411	2206	50787	4.09477e-07	0.00222592	4.8814e-06
biological_process	GO:2001251	negative regulation of chromosome organization	10	UBE2C, MAD2L1, PLK1, BUB1, BUB1B, TTK, PIF1, CCNB1, PTTG1, CDC20	446	100	52893	4.36279e-07	0.00237161	5.18953e-06
biological_process	GO:0072331	signal transduction by p53 class mediator	12	CDKN1A, E2F1, E2F2, PHLDA3, ZNF385A, NUPR1, CDIP1, MDM2, RRM2B, TRIAP1, PMAIP1, EDA2R	444	167	52826	4.38831e-07	0.00238549	5.20849e-06
biological_process	GO:0007599	hemostasis	20	CENPE, KIF2C, DGKA, KIF4A, ZNF385A, C1GALT1C1, RACGAP1, IL6, ITPK1, KIF11, KIFC1, KIF22, AK3, KIF15, RAP2B, TUBA4A, WEE1, KIF18A, SLC7A6, KIF23	436	539	52454	4.51201e-07	0.00245273	5.34319e-06
biological_process	GO:2001233	regulation of apoptotic signaling pathway	17	DDIT3, E2F1, ZNF385A, GCLM, GPX1, HMGB2, FAS, INHBB, ATF3, RRM2B, TRIAP1, PMAIP1, G2E3, BUB1, TNFRSF10B, NRP1, TP53INP1	439	384	52609	4.52146e-07	0.00245787	5.34319e-06
biological_process	GO:0045892	negative regulation of transcription, DNA-templated	30	CEBPB, MXD4, CENPF, PLK3, ZFP90, DDIT3, E2F1, ELF2, PHF19, UHRF1, H2AFX, HMGB2, BIRC5, SMAD7, MDM2, ATF3, NFIC, ZBTB7A, PLK1, HES2, LGR4, MEG3, DEPDC1, SUMO1, BTG2, TBL1XR1, E2F8, HIST1H2AC, MXD3, AURKB	426	1149	51844	4.65077e-07	0.00252816	5.48408e-06
biological_process	GO:0010942	positive regulation of cell death	21	CDKN1A, GADD45A, DDIT3, E2F1, ECT2, PHLDA3, NUPR1, ACER2, IGFBP3, FAS, IL6, INHBB, ATF3, PMAIP1, DIABLO, TIGAR, BUB1, TOP2A, UCP2, TNFRSF10B, TP53INP1	435	596	52397	4.743e-07	0.00257829	5.58072e-06
biological_process	GO:0009891	positive regulation of biosynthetic process	39	CEBPB, KLF6, ZFP90, DDIT3, E2F1, ELF2, BLOC1S2, UHRF1, SERTAD1, HMGB2, HOXC13, IL6, IL11, SMAD7, MEF2D, KITLG, ASPH, ATF3, NFIC, NRF1, PCNA, TRIAP1, LGR4, MEG3, RGMA, GRHL3, EDA2R, CREB3L2, TCEA1, TOP2A, TBL1XR1, E2F8, PSRC1, KLF7, CCNA2, DYRK1B, CCPG1, TP53INP1, MICAL2	417	1763	51230	5.30085e-07	0.00288154	6.22364e-06
biological_process	GO:1903827	regulation of cellular protein localization	19	CDKN1A, TACC3, SPAG5, PLK3, E2F1, ECT2, STOM, ASTN2, RACGAP1, IL6, ASPH, NEK2, PMAIP1, RANGAP1, VAMP2, UBE2G2, NKD2, CCNB1, KNSTRN	437	492	52501	5.41578e-07	0.00294402	6.34487e-06
biological_process	GO:0070482	response to oxygen levels	15	CDKN1A, TACC3, CYGB, PLK3, E2F1, ALDH3A1, ANG, FAS, MDM2, NRF1, PGF, PMAIP1, TIGAR, UCP2, CCNB1	441	295	52698	5.44052e-07	0.00295747	6.36014e-06
molecular_function	GO:0004842	ubiquitin-protein transferase activity	16	UBE2F-SCLY, TRIM3, UBE2C, RNF19B, MIB2, DDB2, RNF19A, FBXO22, UBE2S, UHRF1, BIRC5, MDM2, G2E3, PJA1, UBE2G2, TRAF4	440	342	52651	5.58342e-07	0.00303515	6.49294e-06
biological_process	GO:0048870	cell motility	31	PTPRU, ARPC5, CYGB, OSBPL8, CORO1C, PLXNB2, FLRT2, ASPM, ANG, GPX1, HMGB2, ARPIN, IGFBP3, IL6, SMAD7, KITLG, SERPINF1, PLXNB3, ANLN, DEPDC1B, SHTN1, RAP2B, ZFAND5, FAM83D, ARHGEF39, NRP1, SLC7A6, NTN1, TP53INP1, CDK1, KIF14	425	1227	51766	5.58994e-07	0.00303869	6.49294e-06
biological_process	GO:0051674	localization of cell	31	PTPRU, ARPC5, CYGB, OSBPL8, CORO1C, PLXNB2, FLRT2, ASPM, ANG, GPX1, HMGB2, ARPIN, IGFBP3, IL6, SMAD7, KITLG, SERPINF1, PLXNB3, ANLN, DEPDC1B, SHTN1, RAP2B, ZFAND5, FAM83D, ARHGEF39, NRP1, SLC7A6, NTN1, TP53INP1, CDK1, KIF14	425	1227	51766	5.58994e-07	0.00303869	6.49294e-06
cellular_component	GO:0012505	endomembrane system	62	PLA2G4B, KIF20A, ST6GALNAC2, TRIM3, TGOLN2, CENPF, ADAMTS7, OSBPL8, PLK3, MIB2, MANEAL, DDIT3, ECT2, HACD2, STOM, ALDH3A1, ACSL4, ARL6IP1, ASTN2, NSG1, BLOC1S2, C1GALT1C1, RACGAP1, ACER2, KIFC1, LMNB1, MAD2L1, ACHE, ASPH, CUZD1, RDH11, ZDHHC9, RETSAT, SULF2, CYP26B1, TMEM9B, RGMA, GOPC, RANGAP1, RAP2B, LDAH, SDF2, CREB3L2, SSR3, VAMP2, TAP1, TM7SF2, UBE2G2, SUMO1, SLC35A2, CHAC1, DERL1, ARSJ, ULB…	394	3605	49388	5.60235e-07	0.00304544	6.49347e-06
cellular_component	GO:0065010	extracellular membrane-bounded organelle	51	ARPC5, CFL2, PRSS23, CMBL, RTN4RL1, DPYSL2, AK1, STOM, ACSL4, ICOSLG, PHLDA3, PLXNB2, FLRT2, GAMT, CYFIP2, ANG, GPX1, C1GALT1C1, RACGAP1, H2AFX, IGFBP3, FAS, CD82, NRF1, RRM2B, PCNA, SERPINF1, VPS13C, BOLA2, RGMA, ACTA2, RAP2B, SCP2, EPS8L2, LYNX1, VAMP2, TPM3, TUBA4A, XPC, BTG2, TTYH3, TXNDC5, PVRL4, HIST1H2AC, NTPCR, CES2, SEP15, GDF15, TP53I3, CD70, CDK1	405	2712	50281	6.09005e-07	0.00331055	7.02877e-06
cellular_component	GO:0070062	extracellular exosome	51	ARPC5, CFL2, PRSS23, CMBL, RTN4RL1, DPYSL2, AK1, STOM, ACSL4, ICOSLG, PHLDA3, PLXNB2, FLRT2, GAMT, CYFIP2, ANG, GPX1, C1GALT1C1, RACGAP1, H2AFX, IGFBP3, FAS, CD82, NRF1, RRM2B, PCNA, SERPINF1, VPS13C, BOLA2, RGMA, ACTA2, RAP2B, SCP2, EPS8L2, LYNX1, VAMP2, TPM3, TUBA4A, XPC, BTG2, TTYH3, TXNDC5, PVRL4, HIST1H2AC, NTPCR, CES2, SEP15, GDF15, TP53I3, CD70, CDK1	405	2712	50281	6.09005e-07	0.00331055	7.02877e-06
molecular_function	GO:0044389	ubiquitin-like protein ligase binding	14	UBE2F-SCLY, CDKN1A, CEBPB, UBE2C, UBE2S, SMAD7, MDM2, RANGAP1, AURKA, UBE2G2, SUMO1, DERL1, NKD2, TRAF4	442	256	52737	6.70934e-07	0.0036472	7.71078e-06
biological_process	GO:0031396	regulation of protein ubiquitination	14	UBE2C, FBXO22, FBXO5, UBE2S, MAD2L1, SMAD7, PLK1, BUB1, BUB1B, TTK, DERL1, CCNB1, CDK1, CDC20	442	256	52737	6.70934e-07	0.0036472	7.71078e-06
cellular_component	GO:0043230	extracellular organelle	51	ARPC5, CFL2, PRSS23, CMBL, RTN4RL1, DPYSL2, AK1, STOM, ACSL4, ICOSLG, PHLDA3, PLXNB2, FLRT2, GAMT, CYFIP2, ANG, GPX1, C1GALT1C1, RACGAP1, H2AFX, IGFBP3, FAS, CD82, NRF1, RRM2B, PCNA, SERPINF1, VPS13C, BOLA2, RGMA, ACTA2, RAP2B, SCP2, EPS8L2, LYNX1, VAMP2, TPM3, TUBA4A, XPC, BTG2, TTYH3, TXNDC5, PVRL4, HIST1H2AC, NTPCR, CES2, SEP15, GDF15, TP53I3, CD70, CDK1	405	2725	50268	6.7683e-07	0.00367925	7.74578e-06
cellular_component	GO:1903561	extracellular vesicle	51	ARPC5, CFL2, PRSS23, CMBL, RTN4RL1, DPYSL2, AK1, STOM, ACSL4, ICOSLG, PHLDA3, PLXNB2, FLRT2, GAMT, CYFIP2, ANG, GPX1, C1GALT1C1, RACGAP1, H2AFX, IGFBP3, FAS, CD82, NRF1, RRM2B, PCNA, SERPINF1, VPS13C, BOLA2, RGMA, ACTA2, RAP2B, SCP2, EPS8L2, LYNX1, VAMP2, TPM3, TUBA4A, XPC, BTG2, TTYH3, TXNDC5, PVRL4, HIST1H2AC, NTPCR, CES2, SEP15, GDF15, TP53I3, CD70, CDK1	405	2725	50268	6.7683e-07	0.00367925	7.74578e-06
biological_process	GO:0051098	regulation of binding	14	ZFP90, DDIT3, E2F1, HMGB2, NEK2, PLK1, HJURP, PEX19, AURKA, SUMO1, DERL1, NRP1, AURKB, TRAF4	442	258	52735	7.2914e-07	0.0039636	8.3269e-06
cellular_component	GO:0044425	membrane part	93	C15orf38-AP3S2, TVP23C-CDRT4, ST6GALNAC2, TGOLN2, LYPD1, PAQR4, RNF19B, KLHDC7A, COX15, RTN4RL1, MANEAL, HACD2, STOM, ACSL4, ARL6IP1, ASTN2, ICOSLG, CORO1C, PLXNB2, RNF19A, NSG1, SLCO4A1, GRIN2C, C1GALT1C1, RACGAP1, ACER2, FAS, IL6, CD82, C4orf3, SMAD7, KITLG, ACHE, ASPH, NDUFA5, NINJ1, RDH11, ZDHHC9, PLXNB3, VPS13C, RETSAT, SLC52A1, ATAD3A, TMEM63B, LGR4, THSD1, CYP26B1, DIABLO, CLDND1, TMEM9B, …	363	6381	46612	7.45258e-07	0.00405122	8.49313e-06
biological_process	GO:0023056	positive regulation of signaling	35	TOB1, OSBPL8, MIB2, GADD45A, DDIT3, E2F1, ECT2, ASPM, ZNF385A, NSG1, GPX1, GRIN2C, IGFBP3, FAS, IL6, IL11, INHBB, KITLG, ATF3, NEFL, PMAIP1, LGR4, DEPDC1B, SULF2, TMEM9B, EDA2R, VAMP2, BUB1, TTK, TNFRSF10B, NRP1, TP53INP1, GDF15, TRAF4, CDK1	421	1531	51462	8.21567e-07	0.00446604	9.34317e-06
cellular_component	GO:0031982	vesicle	61	ARPC5, TGOLN2, CFL2, PRSS23, CMBL, RTN4RL1, DPYSL2, AK1, STOM, ACSL4, ICOSLG, CORO1C, PHLDA3, PLXNB2, FLRT2, GAMT, CYFIP2, ANG, GPX1, C1GALT1C1, RACGAP1, H2AFX, IGFBP3, FAS, CD82, MDM2, NRF1, RRM2B, CUZD1, PCNA, SERPINF1, SEPT5, VPS13C, BOLA2, RGMA, GOPC, ACTA2, RAP2B, SCP2, EPS8L2, LYNX1, VAMP2, TPM3, TUBA4A, XPC, BTG2, TTYH3, TXNDC5, PVRL4, ANP32E, HIST1H2AC, NTPCR, NKD2, CES2, NRP1, SEP15, TP5…	395	3569	49424	8.44058e-07	0.0045883	9.57891e-06
biological_process	GO:0009967	positive regulation of signal transduction	33	TOB1, OSBPL8, MIB2, GADD45A, DDIT3, E2F1, ECT2, ASPM, ZNF385A, GPX1, GRIN2C, IGFBP3, FAS, IL6, IL11, INHBB, KITLG, ATF3, NEFL, PMAIP1, LGR4, DEPDC1B, SULF2, TMEM9B, EDA2R, BUB1, TTK, TNFRSF10B, NRP1, TP53INP1, GDF15, TRAF4, CDK1	423	1393	51600	8.67724e-07	0.00471695	9.82697e-06
biological_process	GO:0051347	positive regulation of transferase activity	22	CDKN1A, CENPE, UBE2C, OSBPL8, GADD45A, ECT2, TPX2, FBXO5, UBE2S, ANG, GRIN2C, KITLG, NEFL, PLK1, TIGAR, STIL, PSRC1, CCNB1, TRAF4, CDK1, CDC20, KIF14	434	679	52314	8.7603e-07	0.0047621	9.90042e-06
biological_process	GO:0043068	positive regulation of programmed cell death	20	CDKN1A, GADD45A, DDIT3, E2F1, ECT2, PHLDA3, NUPR1, ACER2, IGFBP3, FAS, IL6, INHBB, ATF3, PMAIP1, DIABLO, TIGAR, BUB1, TOP2A, TNFRSF10B, TP53INP1	436	566	52427	9.11252e-07	0.00495357	1.02771e-05
biological_process	GO:0031109	microtubule polymerization or depolymerization	9	KIF2C, KIF18B, FBXO5, AURKA, KIF18A, PSRC1, CCNB1, AURKB, KIF14	447	80	52913	9.19565e-07	0.00499876	1.03494e-05
molecular_function	GO:0016772	transferase activity, transferring phosphorus-containing groups	26	CDKN1A, LOC102724428, PLK3, DGKA, AK1, ITPK1, NEK2, AK3, PLK1, POLH, PRKAB1, ADCK3, POLD4, NME1-NME2, AURKA, BUB1, BUB1B, TTK, WEE1, RNGTT, NRP1, CCNB1, DYRK1B, NEK9, AURKB, CDK1	430	927	52066	9.2571e-07	0.00503216	1.0397e-05
biological_process	GO:0010562	positive regulation of phosphorus metabolic process	29	CDKN1A, CENPE, OSBPL8, CDCA2, GADD45A, ECT2, TPX2, ANG, GRIN2C, IGFBP3, IL6, IL11, INHBB, KITLG, NEFL, PLK1, TIGAR, RAP2B, EDA2R, STIL, TTK, BTBD10, PSRC1, NRP1, CCNB1, GDF15, TRAF4, CDK1, KIF14	427	1130	51863	1.04156e-06	0.00566189	1.165e-05
biological_process	GO:0045937	positive regulation of phosphate metabolic process	29	CDKN1A, CENPE, OSBPL8, CDCA2, GADD45A, ECT2, TPX2, ANG, GRIN2C, IGFBP3, IL6, IL11, INHBB, KITLG, NEFL, PLK1, TIGAR, RAP2B, EDA2R, STIL, TTK, BTBD10, PSRC1, NRP1, CCNB1, GDF15, TRAF4, CDK1, KIF14	427	1130	51863	1.04156e-06	0.00566189	1.165e-05
biological_process	GO:0016049	cell growth	17	CDKN1A, CDKN2C, DPYSL2, ACSL4, NUPR1, SERTAD1, IGFBP3, IL6, ATAD3A, RGMA, SHTN1, RRAD, AURKA, PSRC1, NRP1, NTN1, KIF14	439	416	52577	1.23797e-06	0.00672961	1.38185e-05
molecular_function	GO:0003690	double-stranded DNA binding	10	KLF6, UHRF1, HMGB2, NFIC, PCNA, HES2, NEIL3, MCM10, XPC, MTERF2	446	115	52878	1.29776e-06	0.0070546	1.44562e-05
biological_process	GO:1903320	regulation of protein modification by small protein conjugation or removal	14	UBE2C, FBXO22, FBXO5, UBE2S, MAD2L1, SMAD7, PLK1, BUB1, BUB1B, TTK, DERL1, CCNB1, CDK1, CDC20	442	275	52718	1.43687e-06	0.00781081	1.5973e-05
biological_process	GO:0007019	microtubule depolymerization	7	KIF2C, KIF18B, AURKA, KIF18A, CCNB1, AURKB, KIF14	449	36	52957	1.49043e-06	0.00810196	1.65346e-05
biological_process	GO:0030334	regulation of cell migration	20	PTPRU, CYGB, OSBPL8, CORO1C, PLXNB2, FLRT2, ARPIN, IGFBP3, IL6, SMAD7, KITLG, SERPINF1, PLXNB3, SHTN1, RAP2B, ARHGEF39, NRP1, NTN1, TP53INP1, KIF14	436	588	52405	1.56639e-06	0.0085149	1.7342e-05
molecular_function	GO:0030234	enzyme regulator activity	25	TBC1D3G, CDKN1A, CDKN2C, DBF4, ECT2, DCP1B, GCLM, RACGAP1, GPSM2, BIRC5, IGFBP3, PCNA, SERPINF1, PPP1R3C, DEPDC1, DEPDC1B, RALGDS, RANGAP1, PIF1, SH3BP5L, ANP32E, ARHGAP11B, PTTG1, ARHGAP29, ARHGAP11A	431	894	52099	1.65023e-06	0.00897065	1.8233e-05
biological_process	GO:0007596	blood coagulation	19	CENPE, KIF2C, DGKA, KIF4A, C1GALT1C1, RACGAP1, IL6, ITPK1, KIF11, KIFC1, KIF22, AK3, KIF15, RAP2B, TUBA4A, WEE1, KIF18A, SLC7A6, KIF23	437	534	52459	1.66425e-06	0.00904686	1.83506e-05
biological_process	GO:0001934	positive regulation of protein phosphorylation	26	CDKN1A, CENPE, OSBPL8, GADD45A, ECT2, TPX2, ANG, GRIN2C, IGFBP3, IL6, IL11, INHBB, KITLG, NEFL, PLK1, RAP2B, EDA2R, STIL, TTK, PSRC1, NRP1, CCNB1, GDF15, TRAF4, CDK1, KIF14	430	961	52032	1.72709e-06	0.00938846	1.9005e-05
biological_process	GO:2000026	regulation of multicellular organismal development	34	CEBPB, CENPF, ADAMTS7, DDIT3, DPYSL2, ECT2, PLXNB2, FLRT2, ASPM, FBXO22, NUPR1, GPX1, HMGB2, FAS, IL6, SMAD7, KITLG, NEFL, ZBTB7A, SERPINF1, PGF, LGR4, MEG3, CYP26B1, RGMA, SHTN1, GRHL3, TNFSF9, NRP1, CCNB1, NTN1, CDK1, CDC20, KIF14	422	1514	51479	1.7697e-06	0.00962007	1.94345e-05
biological_process	GO:1901214	regulation of neuron death	13	CEBPB, DDIT3, GCLM, GPX1, BIRC5, IL6, NEFL, SERPINF1, PMAIP1, BTG2, BTBD10, NRP1, KIF14	443	236	52757	1.77541e-06	0.00965115	1.9458e-05
biological_process	GO:0050817	coagulation	19	CENPE, KIF2C, DGKA, KIF4A, C1GALT1C1, RACGAP1, IL6, ITPK1, KIF11, KIFC1, KIF22, AK3, KIF15, RAP2B, TUBA4A, WEE1, KIF18A, SLC7A6, KIF23	437	540	52453	1.93592e-06	0.0105236	2.11743e-05
biological_process	GO:0040007	growth	25	CDKN1A, CDKN2C, DPYSL2, ACSL4, ASPM, GAMT, NUPR1, GPX1, SERTAD1, IGFBP3, IL6, INHBB, NINJ1, ATAD3A, RGMA, SHTN1, RRAD, STIL, AURKA, PSRC1, NRP1, CCNB1, CCNB2, NTN1, KIF14	431	906	52087	2.06097e-06	0.0112034	2.24969e-05
biological_process	GO:0051436	negative regulation of ubiquitin-protein ligase activity involved in mitotic cell cycle	9	UBE2C, FBXO5, MAD2L1, PLK1, BUB1, BUB1B, TTK, CCNB1, CDC20	447	90	52903	2.09052e-06	0.0113641	2.27737e-05
molecular_function	GO:0016788	hydrolase activity, acting on ester bonds	22	PLA2G4B, PTPRU, CDKN3, HACD2, ANG, INPP1, ITPK1, ACHE, PPP1R3C, NEIL3, PLCXD1, SULF2, TIGAR, LDAH, ARSJ, NTPCR, PPM1D, RNGTT, CES2, DLGAP5, CDC25A, CDC25C	434	720	52273	2.14139e-06	0.0116406	2.32812e-05
biological_process	GO:0048584	positive regulation of response to stimulus	40	ARPC5, TOB1, OSBPL8, MIB2, GADD45A, DDIT3, E2F1, ECT2, FYB, ASPM, ZNF385A, CYFIP2, GPX1, GRIN2C, IGFBP3, FAS, IL6, IL11, INHBB, KITLG, ATF3, NEFL, PCNA, PMAIP1, LGR4, DEPDC1B, SULF2, TMEM9B, TIGAR, EDA2R, BUB1, TTK, NLRX1, YPEL3, TNFRSF10B, NRP1, TP53INP1, GDF15, TRAF4, CDK1	416	1953	51040	2.16453e-06	0.0117664	2.34858e-05
biological_process	GO:0051653	spindle localization	7	NDC80, CENPA, SPAG5, ASPM, GPSM2, NUSAP1, SPDL1	449	39	52954	2.26478e-06	0.0123114	2.45246e-05
biological_process	GO:0007126	meiotic nuclear division	11	ASPM, FBXO5, MKI67, PLK1, CYP26B1, AURKA, TOP2A, PTTG1, ESPL1, CDC20, NCAPD2	445	160	52833	2.28852e-06	0.0124404	2.47324e-05
molecular_function	GO:0016301	kinase activity	23	CDKN1A, LOC102724428, PLK3, DGKA, AK1, ITPK1, NEK2, AK3, PLK1, PRKAB1, ADCK3, NME1-NME2, AURKA, BUB1, BUB1B, TTK, WEE1, NRP1, CCNB1, DYRK1B, NEK9, AURKB, CDK1	433	787	52206	2.39087e-06	0.0129968	2.57872e-05
biological_process	GO:0046907	intracellular transport	37	C15orf38-AP3S2, TOB1, CDKN1A, TACC3, TGOLN2, PLK3, DDIT3, E2F1, ECT2, STOM, ARL6IP1, KIF4A, FYB, FBXO22, NSG1, BLOC1S2, IL6, KPNA2, ASPH, NEFL, ZDHHC9, PMAIP1, VPS13C, PEX19, RANGAP1, SCP2, CREB3L2, SSR3, VAMP2, TAP1, UBE2G2, UCP2, SLBP, DERL1, TXNDC5, NKD2, KIF14	419	1754	51239	2.4471e-06	0.0133024	2.63415e-05
biological_process	GO:0071702	organic substance transport	47	C15orf38-AP3S2, KIF20A, TOB1, CDKN1A, TACC3, TRIM3, CENPF, OSBPL8, PLK3, RNF19B, HNRNPA1L2, DPYSL2, ECT2, STOM, ACSL4, ARL6IP1, FYB, SLCO4A1, ANG, BIRC5, IL6, INHBB, KPNA2, ACHE, ASPH, ZDHHC9, TRIAP1, VPS13C, SLC52A1, LGR4, GOPC, PEX19, RANGAP1, SCP2, SSR3, VAMP2, TAP1, UBE2G2, UCP2, SLC35A2, SLBP, DERL1, KIF18A, SESN2, SLC4A11, NKD2, SLC7A6	409	2523	50470	2.45376e-06	0.0133386	2.63609e-05
molecular_function	GO:0016462	pyrophosphatase activity	23	KIF20A, CENPE, KIF2C, KIF18B, KIF4A, KIF11, KIFC1, KIF22, MCM6, SEPT5, ERCC6L, NUDT15, KIF15, RRAD, TAP1, TOP2A, TUBA4A, PIF1, KIF18A, NTPCR, RNGTT, KIF23, KIF14	433	789	52204	2.48719e-06	0.0135204	2.66674e-05
molecular_function	GO:0016818	hydrolase activity, acting on acid anhydrides, in phosphorus-containing anhydrides	23	KIF20A, CENPE, KIF2C, KIF18B, KIF4A, KIF11, KIFC1, KIF22, MCM6, SEPT5, ERCC6L, NUDT15, KIF15, RRAD, TAP1, TOP2A, TUBA4A, PIF1, KIF18A, NTPCR, RNGTT, KIF23, KIF14	433	791	52202	2.58703e-06	0.0140631	2.76833e-05
biological_process	GO:0019886	antigen processing and presentation of exogenous peptide antigen via MHC class II	9	CENPE, KIF2C, KIF4A, RACGAP1, KIF11, KIF22, KIF15, KIF18A, KIF23	447	93	52900	2.62572e-06	0.0142734	2.80421e-05
biological_process	GO:0042177	negative regulation of protein catabolic process	10	UBE2C, GRIN2C, MAD2L1, PLK1, BUB1, BUB1B, TTK, UBE2G2, CCNB1, CDC20	446	126	52867	2.63277e-06	0.0143117	2.80623e-05
biological_process	GO:0060341	regulation of cellular localization	29	CDKN1A, TACC3, SPAG5, PLK3, DPYSL2, E2F1, ECT2, STOM, ASTN2, ANG, RACGAP1, BIRC5, IL6, IL11, INHBB, ACHE, ASPH, NEK2, PMAIP1, SEPT5, LGR4, RANGAP1, SCP2, VAMP2, UBE2G2, UCP2, NKD2, CCNB1, KNSTRN	427	1188	51805	2.64604e-06	0.0143839	2.81485e-05
molecular_function	GO:0016817	hydrolase activity, acting on acid anhydrides	23	KIF20A, CENPE, KIF2C, KIF18B, KIF4A, KIF11, KIFC1, KIF22, MCM6, SEPT5, ERCC6L, NUDT15, KIF15, RRAD, TAP1, TOP2A, TUBA4A, PIF1, KIF18A, NTPCR, RNGTT, KIF23, KIF14	433	794	52199	2.74366e-06	0.0149146	2.913e-05
biological_process	GO:0042787	protein ubiquitination involved in ubiquitin-dependent protein catabolic process	11	UBE2C, RNF19B, RNF19A, FBXO22, FBXO5, UHRF1, MDM2, PLK1, CCNB1, CDK1, CDC20	445	164	52829	2.81977e-06	0.0153283	2.98797e-05
biological_process	GO:0031570	DNA integrity checkpoint	11	CDKN1A, E2F1, H2AFX, MDM2, TRIAP1, PLK1, TOP2A, XPC, CCNA2, TICRR, CDK1	445	165	52828	2.96823e-06	0.0161353	3.13916e-05
cellular_component	GO:0048471	perinuclear region of cytoplasm	20	CDKN1A, CDKN3, CENPF, STOM, CYFIP2, HMGB2, INHBB, MAD2L1, ACHE, TRIAP1, SERPINF1, SHTN1, RANGAP1, AURKA, VAMP2, BUB1B, STBD1, TRAF4, CDC20, CDC25C	436	617	52376	3.07681e-06	0.0167255	3.24768e-05
biological_process	GO:1903046	meiotic cell cycle process	11	ASPM, FBXO5, MKI67, PLK1, CYP26B1, AURKA, TOP2A, PTTG1, ESPL1, CDC20, NCAPD2	445	166	52827	3.12342e-06	0.0169789	3.29048e-05
biological_process	GO:0009895	negative regulation of catabolic process	12	TOB1, UBE2C, GRIN2C, MAD2L1, PLK1, TIGAR, BUB1, BUB1B, TTK, UBE2G2, CCNB1, CDC20	444	207	52786	3.195e-06	0.017368	3.35939e-05
biological_process	GO:0043065	positive regulation of apoptotic process	19	GADD45A, DDIT3, E2F1, ECT2, PHLDA3, NUPR1, ACER2, IGFBP3, FAS, IL6, INHBB, ATF3, PMAIP1, DIABLO, TIGAR, BUB1, TOP2A, TNFRSF10B, TP53INP1	437	562	52431	3.31024e-06	0.0179944	3.47383e-05
biological_process	GO:0051271	negative regulation of cellular component movement	12	PTPRU, CYGB, OSBPL8, CORO1C, ARPIN, IGFBP3, SMAD7, SERPINF1, PLXNB3, RAP2B, NRP1, TP53INP1	444	208	52785	3.33858e-06	0.0181485	3.49094e-05
biological_process	GO:0042771	intrinsic apoptotic signaling pathway in response to DNA damage by p53 class mediator	7	CDKN1A, PHLDA3, ZNF385A, NUPR1, CDIP1, TRIAP1, PMAIP1	449	42	52951	3.33938e-06	0.0181529	3.49094e-05
molecular_function	GO:0031625	ubiquitin protein ligase binding	13	UBE2F-SCLY, CDKN1A, UBE2C, UBE2S, SMAD7, MDM2, RANGAP1, AURKA, UBE2G2, SUMO1, DERL1, NKD2, TRAF4	443	252	52741	3.38395e-06	0.0183951	3.53074e-05
biological_process	GO:0032435	negative regulation of proteasomal ubiquitin-dependent protein catabolic process	8	UBE2C, MAD2L1, PLK1, BUB1, BUB1B, TTK, CCNB1, CDC20	448	67	52926	3.40624e-06	0.0185163	3.54719e-05
biological_process	GO:2000145	regulation of cell motility	20	PTPRU, CYGB, OSBPL8, CORO1C, PLXNB2, FLRT2, ARPIN, IGFBP3, IL6, SMAD7, KITLG, SERPINF1, PLXNB3, SHTN1, RAP2B, ARHGEF39, NRP1, NTN1, TP53INP1, KIF14	436	622	52371	3.44211e-06	0.0187113	3.57769e-05
biological_process	GO:0000022	mitotic spindle elongation	5	KIF4A, RACGAP1, PRC1, AURKB, KIF23	451	9	52984	3.48726e-06	0.0189568	3.6177e-05
biological_process	GO:0002495	antigen processing and presentation of peptide antigen via MHC class II	9	CENPE, KIF2C, KIF4A, RACGAP1, KIF11, KIF22, KIF15, KIF18A, KIF23	447	97	52896	3.51683e-06	0.0191175	3.64143e-05
cellular_component	GO:0031988	membrane-bounded vesicle	58	ARPC5, TGOLN2, CFL2, PRSS23, CMBL, RTN4RL1, DPYSL2, AK1, STOM, ACSL4, ICOSLG, PHLDA3, PLXNB2, FLRT2, GAMT, CYFIP2, ANG, GPX1, C1GALT1C1, RACGAP1, H2AFX, IGFBP3, FAS, CD82, MDM2, NRF1, RRM2B, CUZD1, PCNA, SERPINF1, SEPT5, VPS13C, BOLA2, RGMA, GOPC, ACTA2, RAP2B, SCP2, EPS8L2, LYNX1, VAMP2, TPM3, TUBA4A, XPC, BTG2, TTYH3, TXNDC5, PVRL4, ANP32E, HIST1H2AC, NTPCR, NKD2, CES2, SEP15, GDF15, TP53I3, CD…	398	3448	49545	3.56373e-06	0.0193724	3.68297e-05
molecular_function	GO:0043566	structure-specific DNA binding	13	KLF6, UHRF1, HMGB2, MCM6, NFIC, PCNA, HES2, NEIL3, MCM10, GRHL3, XPC, PIF1, MTERF2	443	254	52739	3.65581e-06	0.019873	3.77097e-05
biological_process	GO:0002504	antigen processing and presentation of peptide or polysaccharide antigen via MHC class II	9	CENPE, KIF2C, KIF4A, RACGAP1, KIF11, KIF22, KIF15, KIF18A, KIF23	447	98	52895	3.77586e-06	0.0205256	3.88742e-05
biological_process	GO:0044711	single-organism biosynthetic process	35	PLA2G4B, ST6GALNAC2, CYGB, MRPL10, COX15, HACD2, AK1, ACSL4, FDXR, MRPS27, GAMT, GCLM, ANG, ACER2, IL6, ACHE, ATF3, RRM2B, AK3, PCNA, POLH, PPP1R3C, NADSYN1, PRKAB1, ADCK3, POLD4, BCAT1, SCP2, NME1-NME2, TM7SF2, SLBP, E2F8, PIF1, MTERF2, SESN2	421	1636	51357	3.87516e-06	0.0210654	3.98211e-05
biological_process	GO:0051239	regulation of multicellular organismal process	45	TOB1, CEBPB, CENPF, ADAMTS7, CYGB, DDIT3, DPYSL2, ECT2, CORO1C, PLXNB2, FLRT2, ASPM, GAMT, FBXO22, NUPR1, GPX1, HMGB2, FAS, IL6, INHBB, SMAD7, KITLG, ASPH, NEFL, ZBTB7A, SERPINF1, PGF, LGR4, MEG3, SULF2, CYP26B1, RGMA, SHTN1, GRHL3, AURKA, VAMP2, SUMO1, NLRX1, TNFSF9, NRP1, CCNB1, NTN1, CDK1, CDC20, KIF14	411	2392	50601	3.89635e-06	0.0211806	3.99445e-05
biological_process	GO:0010647	positive regulation of cell communication	34	TOB1, OSBPL8, MIB2, GADD45A, DDIT3, E2F1, ECT2, ASPM, ZNF385A, GPX1, GRIN2C, IGFBP3, FAS, IL6, IL11, INHBB, KITLG, ATF3, NEFL, PMAIP1, LGR4, DEPDC1B, SULF2, TMEM9B, EDA2R, VAMP2, BUB1, TTK, TNFRSF10B, NRP1, TP53INP1, GDF15, TRAF4, CDK1	422	1548	51445	3.90186e-06	0.0212105	3.99445e-05
molecular_function	GO:0061630	ubiquitin protein ligase activity	12	UBE2F-SCLY, TRIM3, UBE2C, RNF19B, MIB2, RNF19A, UBE2S, UHRF1, MDM2, G2E3, PJA1, UBE2G2	444	212	52781	3.9709e-06	0.0215858	4.05748e-05
biological_process	GO:1902582	single-organism intracellular transport	34	TOB1, CDKN1A, TACC3, TGOLN2, DDIT3, E2F1, ECT2, STOM, ARL6IP1, KIF4A, FYB, NSG1, BLOC1S2, IL6, KPNA2, ASPH, NEFL, ZDHHC9, PMAIP1, VPS13C, PEX19, RANGAP1, SCP2, CREB3L2, SSR3, VAMP2, TAP1, UBE2G2, UCP2, SLBP, DERL1, TXNDC5, NKD2, KIF14	422	1553	51440	4.04664e-06	0.0219976	4.12712e-05
biological_process	GO:0051402	neuron apoptotic process	12	CEBPB, DDIT3, GCLM, GPX1, BIRC5, FAS, NEFL, PMAIP1, DIABLO, BTG2, NRP1, KIF14	444	214	52779	4.3246e-06	0.0235085	4.40235e-05
molecular_function	GO:0061659	ubiquitin-like protein ligase activity	12	UBE2F-SCLY, TRIM3, UBE2C, RNF19B, MIB2, RNF19A, UBE2S, UHRF1, MDM2, G2E3, PJA1, UBE2G2	444	215	52778	4.51156e-06	0.0245248	4.57553e-05
biological_process	GO:0071103	DNA conformation change	12	CENPA, NCAPH, HMGB2, MCM6, NUSAP1, MIS18BP1, HJURP, NCAPG, TOP2A, PIF1, CCNB1, NCAPD2	444	215	52778	4.51156e-06	0.0245248	4.57553e-05
biological_process	GO:0051270	regulation of cellular component movement	21	PTPRU, CYGB, OSBPL8, CORO1C, PLXNB2, FLRT2, ARPIN, IGFBP3, IL6, SMAD7, KITLG, SERPINF1, PLXNB3, SHTN1, RAP2B, SUMO1, ARHGEF39, NRP1, NTN1, TP53INP1, KIF14	435	698	52295	4.81546e-06	0.0261768	4.87465e-05
biological_process	GO:0051231	spindle elongation	5	KIF4A, RACGAP1, PRC1, AURKB, KIF23	451	10	52983	4.84929e-06	0.0263607	4.89797e-05
biological_process	GO:1901799	negative regulation of proteasomal protein catabolic process	8	UBE2C, MAD2L1, PLK1, BUB1, BUB1B, TTK, CCNB1, CDC20	448	71	52922	4.85652e-06	0.0264001	4.89797e-05
cellular_component	GO:0051233	spindle midzone	6	CENPE, RACGAP1, PLK1, AURKA, AURKB, KIF14	450	25	52968	5.22948e-06	0.0284274	5.26434e-05
biological_process	GO:0031400	negative regulation of protein modification process	19	CDKN1A, CDKN2C, UBE2C, GADD45A, CORO1C, FBXO5, ACER2, IGFBP3, IL6, MAD2L1, SMAD7, ATF3, PLK1, BUB1, BUB1B, TTK, SH3BP5L, CCNB1, CDC20	437	582	52411	5.26733e-06	0.0286332	5.29265e-05
biological_process	GO:0031397	negative regulation of protein ubiquitination	10	UBE2C, FBXO5, MAD2L1, SMAD7, PLK1, BUB1, BUB1B, TTK, CCNB1, CDC20	446	139	52854	5.59975e-06	0.0304402	5.61628e-05
molecular_function	GO:0016791	phosphatase activity	13	PTPRU, CDKN3, HACD2, INPP1, ITPK1, PPP1R3C, TIGAR, NTPCR, PPM1D, RNGTT, DLGAP5, CDC25A, CDC25C	443	266	52727	5.72878e-06	0.0311416	5.73511e-05
molecular_function	GO:0016887	ATPase activity	16	KIF20A, CENPE, KIF2C, KIF18B, KIF4A, KIF11, KIFC1, KIF22, MCM6, KIF15, TAP1, TOP2A, PIF1, KIF18A, KIF23, KIF14	440	419	52574	6.0977e-06	0.0331471	6.09322e-05
cellular_component	GO:0031224	intrinsic component of membrane	78	TVP23C-CDRT4, ST6GALNAC2, TGOLN2, LYPD1, PAQR4, RNF19B, KLHDC7A, COX15, RTN4RL1, MANEAL, HACD2, STOM, ACSL4, ARL6IP1, ASTN2, ICOSLG, PLXNB2, RNF19A, NSG1, SLCO4A1, GRIN2C, C1GALT1C1, ACER2, FAS, IL6, CD82, C4orf3, KITLG, ACHE, ASPH, NINJ1, RDH11, ZDHHC9, PLXNB3, SLC52A1, ATAD3A, TMEM63B, LGR4, THSD1, DIABLO, CLDND1, TMEM9B, RGMA, ADCK3, PEX19, EDA2R, CCDC90B, CREB3L2, LYNX1, SSR3, VAMP2, TAP1, TM…	378	5283	47710	6.47432e-06	0.0351944	6.45769e-05
cellular_component	GO:0031967	organelle envelope	26	PLA2G4B, CENPF, OSBPL8, MRPL10, SPATA18, COX15, ECT2, ACSL4, FDXR, MRPS27, LMNB1, MAD2L1, NDUFA5, TRIAP1, PMAIP1, RETSAT, ATAD3A, PRODH, DIABLO, TIGAR, RANGAP1, TM7SF2, SUMO1, UCP2, NLRX1, SLC25A46	430	1040	51953	6.56212e-06	0.0356717	6.53328e-05
biological_process	GO:0031100	organ regeneration	8	PTPRU, CDKN1A, CEBPB, MKI67, NRF1, PGF, UCP2, CCNA2	448	75	52918	6.78739e-06	0.0368962	6.74514e-05
biological_process	GO:1901700	response to oxygen-containing compound	33	CDKN1A, CEBPB, OSBPL8, PLK3, KLF6, DPYSL2, E2F1, ECT2, ALDH3A1, SESN1, GPX1, GRIN2C, HMGB2, BIRC5, ACER2, IL6, INHBB, KITLG, ASPH, NEFL, NRF1, SERPINF1, PRKAB1, CYP26B1, RANGAP1, AURKA, VAMP2, UCP2, BTG2, SESN2, CCNA2, CCNB1, TP53INP1	423	1525	51468	6.79973e-06	0.0369633	6.74514e-05
biological_process	GO:0001666	response to hypoxia	13	TACC3, CYGB, PLK3, E2F1, ALDH3A1, ANG, MDM2, NRF1, PGF, PMAIP1, TIGAR, UCP2, CCNB1	443	271	52722	6.85983e-06	0.03729	6.79235e-05
cellular_component	GO:0031975	envelope	26	PLA2G4B, CENPF, OSBPL8, MRPL10, SPATA18, COX15, ECT2, ACSL4, FDXR, MRPS27, LMNB1, MAD2L1, NDUFA5, TRIAP1, PMAIP1, RETSAT, ATAD3A, PRODH, DIABLO, TIGAR, RANGAP1, TM7SF2, SUMO1, UCP2, NLRX1, SLC25A46	430	1044	51949	6.99347e-06	0.0380165	6.91209e-05
biological_process	GO:0071900	regulation of protein serine/threonine kinase activity	16	CDKN1A, CDKN2C, CDKN3, UBE2C, GADD45A, SERTAD1, KITLG, PLK1, STIL, SESN2, PSRC1, CCNA2, CCNG1, CDK1, CDC25A, CDC25C	440	425	52568	7.17875e-06	0.0390237	7.08234e-05
biological_process	GO:0030336	negative regulation of cell migration	11	PTPRU, CYGB, OSBPL8, CORO1C, ARPIN, IGFBP3, SMAD7, SERPINF1, PLXNB3, RAP2B, TP53INP1	445	184	52809	7.40185e-06	0.0402365	7.28921e-05
molecular_function	GO:0098772	molecular function regulator	28	TBC1D3G, CDKN1A, CDKN2C, DBF4, ECT2, DCP1B, GCLM, RACGAP1, GPSM2, BIRC5, IGFBP3, PCNA, SERPINF1, PPP1R3C, DEPDC1, DEPDC1B, RALGDS, RANGAP1, EPS8L2, SUMO1, PIF1, SH3BP5L, ANP32E, ARHGEF39, ARHGAP11B, PTTG1, ARHGAP29, ARHGAP11A	428	1187	51806	7.46305e-06	0.0405692	7.3362e-05
biological_process	GO:0040013	negative regulation of locomotion	12	PTPRU, CYGB, OSBPL8, CORO1C, ARPIN, IGFBP3, SMAD7, SERPINF1, PLXNB3, RAP2B, NRP1, TP53INP1	444	228	52765	7.66813e-06	0.0416839	7.52417e-05
cellular_component	GO:0005730	nucleolus	23	PLK3, KIF18B, ZNF385A, ANG, MDM2, MKI67, ATF3, NEK2, NFIC, NUSAP1, PLK1, FAM64A, CDCA8, HJURP, MCM10, G2E3, TCEA1, TOP2A, SUMO1, XPC, YPEL3, BTBD10, SAPCD2	433	851	52142	7.93075e-06	0.0431116	7.76785e-05
biological_process	GO:0036293	response to decreased oxygen levels	13	TACC3, CYGB, PLK3, E2F1, ALDH3A1, ANG, MDM2, NRF1, PGF, PMAIP1, TIGAR, UCP2, CCNB1	443	276	52717	8.18229e-06	0.044479	7.99981e-05
biological_process	GO:0097191	extrinsic apoptotic signaling pathway	12	GCLM, BLOC1S2, GPX1, HMGB2, FAS, KITLG, ATF3, PMAIP1, DIABLO, TNFRSF10B, NRP1, CD70	444	230	52763	8.2943e-06	0.0450878	8.09476e-05
biological_process	GO:0022008	neurogenesis	34	ARPC5, CDKN2C, TACC3, CEBPB, DPYSL4, RTN4RL1, DPYSL2, ECT2, ACSL4, PLXNB2, FLRT2, KIF4A, ASPM, BLOC1S2, GRIN2C, RACGAP1, HMGB2, IL6, KITLG, NEFL, SERPINF1, PLXNB3, MEG3, RGMA, SHTN1, AURKA, WEE1, BTG2, CHAC1, KLF7, NRP1, NTN1, CDK1, CDC20	422	1630	51363	8.51333e-06	0.0462785	8.2933e-05
biological_process	GO:0030261	chromosome condensation	6	NCAPH, NUSAP1, NCAPG, TOP2A, CCNB1, NCAPD2	450	28	52965	8.52824e-06	0.0463595	8.2933e-05
biological_process	GO:1903051	negative regulation of proteolysis involved in cellular protein catabolic process	8	UBE2C, MAD2L1, PLK1, BUB1, BUB1B, TTK, CCNB1, CDC20	448	78	52915	8.62117e-06	0.0468647	8.35377e-05
biological_process	GO:0008625	extrinsic apoptotic signaling pathway via death domain receptors	8	BLOC1S2, GPX1, HMGB2, FAS, ATF3, PMAIP1, DIABLO, TNFRSF10B	448	78	52915	8.62117e-06	0.0468647	8.35377e-05
biological_process	GO:0071459	protein localization to chromosome, centromeric region	5	CENPA, SPDL1, BUB1B, AURKB, CDK1	451	12	52981	8.69858e-06	0.0472855	8.41379e-05
molecular_function	GO:0043169	cation binding	64	EFCAB10, CDKN1A, LOC102724428, TRIM3, DBF4, ADAMTS7, CYGB, RNF19B, KLF6, CRIP2, MIB2, ZFP90, DGKA, VWCE, ISCU, RNF19A, ZNF385A, PHF19, ZNF337, FBXO5, APOBEC3C, ANG, RACGAP1, UHRF1, BIRC5, INPP1, ITPK1, SMAD7, MDM2, ACHE, ASPH, NEK2, RRM2B, ZDHHC9, ZBTB7A, POLH, NEIL3, NUDT15, MCM10, ZCCHC8, G2E3, SULF2, CYP26B1, RABGGTA, PJA1, TCEA1, ZNF354A, TOP2A, WEE1, ZNF79, ZFAND5, ARSJ, PIF1, HPDL, PPM1D, N…	392	4099	48894	9.02419e-06	0.0490555	8.70988e-05
biological_process	GO:1903321	negative regulation of protein modification by small protein conjugation or removal	10	UBE2C, FBXO5, MAD2L1, SMAD7, PLK1, BUB1, BUB1B, TTK, CCNB1, CDC20	446	148	52845	9.03674e-06	0.0491237	8.70988e-05
biological_process	GO:1901564	organonitrogen compound metabolic process	40	PLA2G4B, ABHD14A-ACY1, TOB1, ST6GALNAC2, MRPL10, COX15, HACD2, AK1, FDXR, MRPS27, GAMT, ZNF385A, GCLM, APOBEC3C, SLCO4A1, ANG, GPX1, HMMR, ACER2, IL6, MKI67, ACHE, AK3, NADSYN1, NUDT15, PRODH, TIGAR, BCAT1, NME1-NME2, SSR3, TCEA1, EIF3CL, UNG, BTG2, ARSJ, HPDL, EIF3C, TICRR, SLC7A6, TP53I3	416	2096	50897	9.79278e-06	0.0532336	9.42187e-05
biological_process	GO:0009991	response to extracellular stimulus	20	CDKN1A, ADAMTS7, DDIT3, STOM, ALDH3A1, ACSL4, LSM4, FBXO22, GPX1, IL6, INHBB, ATF3, NRF1, PMAIP1, PRKAB1, TIGAR, UCP2, PPM1D, STBD1, TP53INP1	436	672	52321	9.93106e-06	0.0539852	9.53803e-05
molecular_function	GO:0046872	metal ion binding	63	EFCAB10, CDKN1A, LOC102724428, TRIM3, DBF4, ADAMTS7, CYGB, RNF19B, KLF6, CRIP2, MIB2, ZFP90, DGKA, VWCE, ISCU, RNF19A, ZNF385A, PHF19, ZNF337, FBXO5, APOBEC3C, ANG, RACGAP1, UHRF1, BIRC5, INPP1, ITPK1, SMAD7, MDM2, ASPH, NEK2, RRM2B, ZDHHC9, ZBTB7A, POLH, NEIL3, NUDT15, MCM10, ZCCHC8, G2E3, SULF2, CYP26B1, RABGGTA, PJA1, TCEA1, ZNF354A, TOP2A, WEE1, ZNF79, ZFAND5, ARSJ, PIF1, HPDL, PPM1D, NKD2, K…	393	4004	48989	1.06638e-05	0.0579686	0.000102237
biological_process	GO:0010648	negative regulation of cell communication	27	TOB1, DDIT3, PHLDA3, ZNF385A, GCLM, GPX1, HMGB2, IL6, IL11, INHBB, SMAD7, MDM2, ACHE, ATF3, RRM2B, TRIAP1, LGR4, MEG3, G2E3, SULF2, CYP26B1, TIGAR, UCP2, CHAC1, NLRX1, NKD2, NRP1	429	1142	51851	1.08377e-05	0.0589137	0.000103721
cellular_component	GO:0071944	cell periphery	73	PTPRU, TBC1D3G, TGOLN2, OSBPL8, LYPD1, CRIP2, RTN4RL1, KIF18B, FAM84B, DGKA, AK1, STOM, ALDH3A1, ICOSLG, CORO1C, PHLDA3, PLXNB2, FYB, NSG1, SLCO4A1, GRIN2C, RACGAP1, GPSM2, HMMR, FAS, IL6, CD82, SMAD7, MDM2, ARVCF, KITLG, ACHE, ASPH, PLXNB3, SEPT5, ANLN, ERCC6L, SLC52A1, LGR4, SULF2, DIABLO, CLDND1, RGMA, GOPC, PEX19, RAP2B, EDA2R, RRAD, EPS8L2, LYNX1, VAMP2, TAP1, TM7SF2, SUMO1, XPC, ULBP1, TTYH…	383	4941	48052	1.11005e-05	0.0603424	0.00010605
biological_process	GO:2000146	negative regulation of cell motility	11	PTPRU, CYGB, OSBPL8, CORO1C, ARPIN, IGFBP3, SMAD7, SERPINF1, PLXNB3, RAP2B, TP53INP1	445	194	52799	1.14831e-05	0.0624222	0.000109513
biological_process	GO:0045931	positive regulation of mitotic cell cycle	9	UBE2C, BIRC5, MAD2L1, MDM2, NUSAP1, PLK1, AURKA, CCNB1, ESPL1	447	116	52877	1.20654e-05	0.0655876	0.000114864
molecular_function	GO:0017111	nucleoside-triphosphatase activity	21	KIF20A, CENPE, KIF2C, KIF18B, KIF4A, KIF11, KIFC1, KIF22, MCM6, SEPT5, ERCC6L, KIF15, RRAD, TAP1, TOP2A, TUBA4A, PIF1, KIF18A, NTPCR, KIF23, KIF14	435	746	52247	1.23158e-05	0.0669487	0.000117043
biological_process	GO:1903363	negative regulation of cellular protein catabolic process	8	UBE2C, MAD2L1, PLK1, BUB1, BUB1B, TTK, CCNB1, CDC20	448	83	52910	1.25822e-05	0.0683967	0.000119366
biological_process	GO:0040012	regulation of locomotion	20	PTPRU, CYGB, OSBPL8, CORO1C, PLXNB2, FLRT2, ARPIN, IGFBP3, IL6, SMAD7, KITLG, SERPINF1, PLXNB3, SHTN1, RAP2B, ARHGEF39, NRP1, NTN1, TP53INP1, KIF14	436	684	52309	1.26065e-05	0.068529	0.000119388
biological_process	GO:0070925	organelle assembly	18	CENPA, CFL2, TPX2, KIF4A, LSM4, ASPM, FBXO5, RACGAP1, BIRC5, KIF11, KIFC1, NEK2, PLK1, ANLN, AURKA, AURKB, TP53INP1, KIF23	438	564	52429	1.31941e-05	0.071723	0.000124736
biological_process	GO:0045944	positive regulation of transcription from RNA polymerase II promoter	25	CEBPB, KLF6, DDIT3, E2F1, UHRF1, SERTAD1, HMGB2, HOXC13, IL6, IL11, SMAD7, MEF2D, ATF3, NFIC, NRF1, TRIAP1, RGMA, GRHL3, CREB3L2, TCEA1, TOP2A, TBL1XR1, E2F8, CCPG1, MICAL2	431	1017	51976	1.34365e-05	0.0730411	0.000126807
biological_process	GO:0006261	DNA-dependent DNA replication	9	MCM6, RRM2B, PCNA, MCM10, POLD4, TOP2A, SLBP, E2F8, TICRR	447	118	52875	1.35624e-05	0.0737252	0.000127773
biological_process	GO:0071496	cellular response to external stimulus	17	CDKN1A, ADAMTS7, GADD45A, STOM, LSM4, FBXO22, FAS, INHBB, ATF3, PMAIP1, PRKAB1, TIGAR, UCP2, PPM1D, TNFRSF10B, STBD1, TP53INP1	439	510	52483	1.47297e-05	0.0800705	0.00013853
biological_process	GO:0007050	cell cycle arrest	12	CDKN1A, CDKN2C, CDKN3, GADD45A, DDIT3, AK1, SESN1, GAS2L3, MDM2, TRIAP1, PRKAB1, TP53INP1	444	246	52747	1.5123e-05	0.0822085	0.000141984
biological_process	GO:0050673	epithelial cell proliferation	14	CEBPB, ANG, GPX1, HMGB2, BIRC5, IGFBP3, IL6, MKI67, SERPINF1, PGF, PLXNB3, LGR4, BTBD10, NRP1	442	346	52647	1.5482e-05	0.0841603	0.000145104
biological_process	GO:1901215	negative regulation of neuron death	10	CEBPB, GCLM, BIRC5, IL6, NEFL, SERPINF1, BTG2, BTBD10, NRP1, KIF14	446	159	52834	1.55527e-05	0.0845447	0.000145516
biological_process	GO:0009725	response to hormone	25	PTPRU, CDKN1A, OSBPL8, ALDH3A1, ANG, GPX1, GRIN2C, HMGB2, FAS, IL6, INHBB, KITLG, NEFL, NRF1, SERPINF1, PGF, PRKAB1, RANGAP1, SNRPN, AURKA, VAMP2, UCP2, BTG2, SESN2, CCNA2	431	1030	51963	1.6413e-05	0.0892212	0.000153301
molecular_function	GO:0042803	protein homodimerization activity	20	CEBPB, CENPF, DDIT3, ECT2, STOM, GAMT, ANG, BIRC5, INHBB, MAD2L1, ACHE, ATF3, NRF1, PGF, TAP1, TOP2A, E2F8, MTERF2, PVRL4, TP53I3	436	698	52295	1.65332e-05	0.0898745	0.000154159
biological_process	GO:0016032	viral process	21	CENPA, STOM, APOBEC3C, GTF2A1, H2AFX, KPNA2, MDM2, SLC52A1, TAP1, TCEA1, BUB1, TOP2A, SUMO1, UNG, DERL1, NLRX1, PVRL4, RNGTT, CCNA2, C9orf69, CDC25C	435	763	52230	1.68382e-05	0.0915327	0.000156734
biological_process	GO:0044403	symbiosis, encompassing mutualism through parasitism	22	CENPA, STOM, APOBEC3C, GPX1, GTF2A1, H2AFX, KPNA2, MDM2, SLC52A1, TAP1, TCEA1, BUB1, TOP2A, SUMO1, UNG, DERL1, NLRX1, PVRL4, RNGTT, CCNA2, C9orf69, CDC25C	434	831	52162	1.76178e-05	0.0957702	0.00016343
biological_process	GO:0044419	interspecies interaction between organisms	22	CENPA, STOM, APOBEC3C, GPX1, GTF2A1, H2AFX, KPNA2, MDM2, SLC52A1, TAP1, TCEA1, BUB1, TOP2A, SUMO1, UNG, DERL1, NLRX1, PVRL4, RNGTT, CCNA2, C9orf69, CDC25C	434	831	52162	1.76178e-05	0.0957702	0.00016343
biological_process	GO:0031330	negative regulation of cellular catabolic process	10	TOB1, UBE2C, MAD2L1, PLK1, TIGAR, BUB1, BUB1B, TTK, CCNB1, CDC20	446	162	52831	1.79044e-05	0.0973286	0.000165807
biological_process	GO:0051094	positive regulation of developmental process	26	CEBPB, ECT2, CORO1C, PLXNB2, FLRT2, ASPM, ZNF385A, HMGB2, IGFBP3, IL6, KITLG, NEFL, SERPINF1, PGF, LGR4, MEG3, CYP26B1, SHTN1, AURKA, YPEL3, TNFSF9, NRP1, CCNB1, NTN1, GDF15, CDC20	430	1106	51887	1.79513e-05	0.0975831	0.000165958
biological_process	GO:0034976	response to endoplasmic reticulum stress	12	PLA2G4B, CEBPB, DDIT3, ATF3, PMAIP1, SDF2, CREB3L2, UBE2G2, CHAC1, DERL1, TXNDC5, TNFRSF10B	444	251	52742	1.80755e-05	0.0982587	0.000166823
biological_process	GO:0061061	muscle structure development	18	CENPF, CFL2, DDIT3, FBXO22, NUPR1, GPX1, IGFBP3, IL6, SMAD7, MEF2D, ACHE, ATF3, MEG3, CYP26B1, BTG2, CCNB1, DYRK1B, GDF15	438	579	52414	1.82362e-05	0.0991321	0.000168021
biological_process	GO:0060284	regulation of cell development	21	DPYSL2, ECT2, CORO1C, PLXNB2, FLRT2, ASPM, FBXO22, HMGB2, IL6, SMAD7, NEFL, SERPINF1, MEG3, RGMA, SHTN1, AURKA, NRP1, NTN1, CDK1, CDC20, KIF14	435	770	52223	1.90986e-05	0.10382	0.000175669
biological_process	GO:0034502	protein localization to chromosome	6	CENPA, PLK1, SPDL1, BUB1B, AURKB, CDK1	450	34	52959	1.98378e-05	0.107838	0.000182159
biological_process	GO:0031667	response to nutrient levels	19	ADAMTS7, DDIT3, STOM, ALDH3A1, ACSL4, LSM4, FBXO22, GPX1, IL6, INHBB, ATF3, NRF1, PMAIP1, PRKAB1, TIGAR, UCP2, PPM1D, STBD1, TP53INP1	437	645	52348	2.00155e-05	0.108804	0.000183481
cellular_component	GO:0000942	condensed nuclear chromosome outer kinetochore	4	NDC80, PLK1, BUB1, CCNB1	452	4	52989	2.0913e-05	0.113683	0.000191386
biological_process	GO:0044764	multi-organism cellular process	21	CENPA, STOM, APOBEC3C, GTF2A1, H2AFX, KPNA2, MDM2, SLC52A1, TAP1, TCEA1, BUB1, TOP2A, SUMO1, UNG, DERL1, NLRX1, PVRL4, RNGTT, CCNA2, C9orf69, CDC25C	435	776	52217	2.1249e-05	0.115509	0.000194133
molecular_function	GO:0003684	damaged DNA binding	7	DDB2, H2AFX, HMGB2, PCNA, POLH, NEIL3, XPC	449	60	52933	2.17289e-05	0.118118	0.000198185
biological_process	GO:0031175	neuron projection development	25	ARPC5, DPYSL4, RTN4RL1, DPYSL2, ACSL4, PLXNB2, FLRT2, KIF4A, BLOC1S2, GRIN2C, IL6, KITLG, NEFL, SERPINF1, PLXNB3, MEG3, RGMA, SHTN1, AURKA, WEE1, BTG2, KLF7, NRP1, NTN1, CDC20	431	1050	51943	2.21687e-05	0.120509	0.000201857
biological_process	GO:0006997	nucleus organization	9	OSBPL8, HMGB2, PLK1, CEP55, SUMO1, CCNB1, CCNB2, NEK9, CDK1	447	127	52866	2.23803e-05	0.121659	0.000203444
molecular_function	GO:0042578	phosphoric ester hydrolase activity	14	PTPRU, CDKN3, HACD2, INPP1, ITPK1, PPP1R3C, PLCXD1, TIGAR, NTPCR, PPM1D, RNGTT, DLGAP5, CDC25A, CDC25C	442	359	52634	2.2437e-05	0.121967	0.000203618
biological_process	GO:0051293	establishment of spindle localization	6	NDC80, CENPA, SPAG5, GPSM2, NUSAP1, SPDL1	450	35	52958	2.25137e-05	0.122385	0.000203974
biological_process	GO:0031398	positive regulation of protein ubiquitination	10	UBE2C, FBXO22, FBXO5, UBE2S, SMAD7, PLK1, DERL1, CCNB1, CDK1, CDC20	446	169	52824	2.45939e-05	0.133693	0.00022245
cellular_component	GO:1990234	transferase complex	19	CDKN1A, UBE2C, RNF19B, MIB2, DDB2, RNF19A, PHF19, UBE2S, GTF2A1, ZDHHC9, PRKAB1, POLD4, RABGGTA, SDF2, BUB1B, DCAF5, CCNF, FBXO44, CDC20	437	657	52336	2.53019e-05	0.137541	0.000228474
biological_process	GO:0048609	multicellular organismal reproductive process	20	CEBPB, E2F1, ACSL4, ASPM, GAMT, FBXO5, RACGAP1, H2AFX, HMGB2, INHBB, KIFC1, KITLG, SERPINF1, LGR4, SPATA7, CYP26B1, AURKA, CCNB1, PTTG1, CDC25C	436	721	52272	2.54038e-05	0.138095	0.000229014
biological_process	GO:0023057	negative regulation of signaling	26	TOB1, DDIT3, PHLDA3, ZNF385A, GCLM, GPX1, HMGB2, IL6, IL11, INHBB, SMAD7, MDM2, ACHE, ATF3, RRM2B, TRIAP1, LGR4, MEG3, G2E3, SULF2, CYP26B1, UCP2, CHAC1, NLRX1, NKD2, NRP1	430	1131	51862	2.56773e-05	0.139582	0.000230951
biological_process	GO:0002478	antigen processing and presentation of exogenous peptide antigen	10	CENPE, KIF2C, KIF4A, RACGAP1, KIF11, KIF22, KIF15, TAP1, KIF18A, KIF23	446	170	52823	2.57037e-05	0.139725	0.000230951
biological_process	GO:2000116	regulation of cysteine-type endopeptidase activity	11	CYFIP2, GPX1, BIRC5, ACER2, FAS, IL6, ASPH, TRIAP1, PMAIP1, DIABLO, TNFRSF10B	445	215	52778	2.66849e-05	0.145059	0.000239372
biological_process	GO:0034622	cellular macromolecular complex assembly	21	ARPC4-TTLL3, ARPC5, C7orf55-LUC7L2, CENPA, UBE2C, COX15, LSM4, FBXO5, NSG1, UBE2S, ANG, NEFL, ANLN, MIS18BP1, HJURP, SMN1, TUBA4A, EIF3CL, PSRC1, EIF3C, TICRR	435	794	52199	2.90638e-05	0.157991	0.000260281
biological_process	GO:0009790	embryo development	24	CEBPB, ACSL4, PLXNB2, GAMT, RACGAP1, HOXA3, KITLG, NEK2, MEG3, G2E3, SULF2, CYP26B1, RGMA, GRHL3, STIL, TOP2A, ZFAND5, E2F8, NRP1, CCNB1, CCNB2, NTN1, MICAL2, CDK1	432	999	51994	2.94115e-05	0.159881	0.000262962
cellular_component	GO:0032133	chromosome passenger complex	4	BIRC5, CDCA8, AURKA, AURKB	452	5	52988	3.32489e-05	0.180741	0.000296783
biological_process	GO:0019884	antigen processing and presentation of exogenous antigen	10	CENPE, KIF2C, KIF4A, RACGAP1, KIF11, KIF22, KIF15, TAP1, KIF18A, KIF23	446	177	52816	3.47278e-05	0.18878	0.000309476
biological_process	GO:0051351	positive regulation of ligase activity	8	UBE2C, FBXO5, GCLM, UBE2S, PLK1, CCNB1, CDK1, CDC20	448	99	52894	3.65221e-05	0.198534	0.000324933
cellular_component	GO:0000151	ubiquitin ligase complex	11	UBE2C, RNF19B, MIB2, DDB2, RNF19A, UBE2S, BUB1B, DCAF5, CCNF, FBXO44, CDC20	445	224	52769	3.72128e-05	0.202289	0.000330537
biological_process	GO:0032504	multicellular organism reproduction	20	CEBPB, E2F1, ACSL4, ASPM, GAMT, FBXO5, RACGAP1, H2AFX, HMGB2, INHBB, KIFC1, KITLG, SERPINF1, LGR4, SPATA7, CYP26B1, AURKA, CCNB1, PTTG1, CDC25C	436	743	52250	3.76447e-05	0.204637	0.000333828
biological_process	GO:0051297	centrosome organization	8	GADD45A, KIF11, NEK2, PLK1, STIL, AURKA, CCNF, CDK1	448	100	52893	3.87951e-05	0.21089	0.000343469
biological_process	GO:0043624	cellular protein complex disassembly	12	CFL2, KIF2C, MRPL10, KIF18B, MRPS27, ASPH, AURKA, KIF18A, CCNB1, AURKB, MICAL2, KIF14	444	274	52719	3.90081e-05	0.212048	0.000344793
molecular_function	GO:0046914	transition metal ion binding	29	TRIM3, DBF4, ADAMTS7, CYGB, RNF19B, CRIP2, MIB2, ISCU, RNF19A, ZNF385A, PHF19, APOBEC3C, ANG, UHRF1, BIRC5, MDM2, ZDHHC9, NEIL3, ZCCHC8, G2E3, CYP26B1, RABGGTA, PJA1, TCEA1, ZFAND5, KLF7, TP53I3, TRAF4, MICAL2	427	1372	51621	3.94061e-05	0.214211	0.000347746
biological_process	GO:1903322	positive regulation of protein modification by small protein conjugation or removal	10	UBE2C, FBXO22, FBXO5, UBE2S, SMAD7, PLK1, DERL1, CCNB1, CDK1, CDC20	446	182	52811	4.2703e-05	0.232134	0.00037623
biological_process	GO:0001558	regulation of cell growth	13	CDKN1A, CDKN2C, DPYSL2, ACSL4, SERTAD1, IGFBP3, RGMA, SHTN1, RRAD, PSRC1, NRP1, NTN1, KIF14	443	329	52664	4.30745e-05	0.234153	0.000378888
biological_process	GO:0030030	cell projection organization	30	ARPC5, DPYSL4, RTN4RL1, DPYSL2, ACSL4, CORO1C, PLXNB2, FLRT2, KIF4A, BLOC1S2, GRIN2C, ARPIN, IL6, KITLG, NEFL, SERPINF1, PLXNB3, MEG3, RGMA, SHTN1, RAP2B, EPS8L2, STIL, AURKA, WEE1, BTG2, KLF7, NRP1, NTN1, CDC20	426	1463	51530	4.34291e-05	0.236081	0.00038139
biological_process	GO:0007005	mitochondrion organization	19	ADAMTS7, MRPL10, SPATA18, E2F1, STOM, MRPS27, LSM4, GCLM, BLOC1S2, GPX1, NRF1, RRM2B, TRIAP1, PMAIP1, PRKAB1, TIGAR, PIF1, MTERF2, SESN2	437	690	52303	4.68073e-05	0.254444	0.000410394
biological_process	GO:0022414	reproductive process	26	CEBPB, E2F1, ACSL4, ASPM, GAMT, FBXO5, NUPR1, RACGAP1, H2AFX, HMGB2, INHBB, KIFC1, KITLG, SERPINF1, PGF, LGR4, SPATA7, CYP26B1, AURKA, UCP2, E2F8, CCNB1, CCNF, PTTG1, CDK1, CDC25C	430	1177	51816	4.81097e-05	0.261524	0.000419858
cellular_component	GO:1990752	microtubule end	5	SPAG5, KIF2C, KIF18B, ASPM, KNSTRN	451	20	52973	4.81184e-05	0.261572	0.000419858
biological_process	GO:0060236	regulation of mitotic spindle organization	5	TPX2, PLK1, BORA, PSRC1, CCNB1	451	20	52973	4.81184e-05	0.261572	0.000419858
biological_process	GO:0030010	establishment of cell polarity	8	NDC80, CENPA, SPAG5, GPSM2, SPDL1, CYP26B1, SHTN1, WEE1	448	104	52889	4.90799e-05	0.266798	0.000427561
biological_process	GO:0051052	regulation of DNA metabolic process	12	CDKN1A, IL6, KPNA2, KITLG, PCNA, POLH, MEG3, TIGAR, TOP2A, E2F8, PIF1, TICRR	444	282	52711	5.00637e-05	0.272146	0.000435434
biological_process	GO:0008630	intrinsic apoptotic signaling pathway in response to DNA damage	8	CDKN1A, E2F1, PHLDA3, ZNF385A, NUPR1, CDIP1, TRIAP1, PMAIP1	448	105	52888	5.19722e-05	0.282521	0.000451311
biological_process	GO:0006998	nuclear envelope organization	7	OSBPL8, PLK1, SUMO1, CCNB1, CCNB2, NEK9, CDK1	449	71	52922	5.24062e-05	0.28488	0.000453631
biological_process	GO:0007098	centrosome cycle	7	GADD45A, KIF11, NEK2, STIL, AURKA, CCNF, CDK1	449	71	52922	5.24062e-05	0.28488	0.000453631
biological_process	GO:0048002	antigen processing and presentation of peptide antigen	10	CENPE, KIF2C, KIF4A, RACGAP1, KIF11, KIF22, KIF15, TAP1, KIF18A, KIF23	446	189	52804	5.64284e-05	0.306745	0.00048767
biological_process	GO:0043523	regulation of neuron apoptotic process	10	CEBPB, DDIT3, GCLM, GPX1, BIRC5, NEFL, PMAIP1, BTG2, NRP1, KIF14	446	190	52803	5.86631e-05	0.318893	0.000506179
biological_process	GO:0044702	single organism reproductive process	24	CEBPB, E2F1, ACSL4, ASPM, GAMT, FBXO5, NUPR1, RACGAP1, H2AFX, HMGB2, INHBB, KIFC1, KITLG, SERPINF1, LGR4, SPATA7, CYP26B1, AURKA, E2F8, CCNB1, CCNF, PTTG1, CDK1, CDC25C	432	1047	51946	5.88844e-05	0.320095	0.000507283
molecular_function	GO:0016773	phosphotransferase activity, alcohol group as acceptor	19	CDKN1A, LOC102724428, PLK3, DGKA, ITPK1, NEK2, PLK1, PRKAB1, AURKA, BUB1, BUB1B, TTK, WEE1, NRP1, CCNB1, DYRK1B, NEK9, AURKB, CDK1	437	705	52288	6.10828e-05	0.332046	0.000525389
biological_process	GO:0045840	positive regulation of mitotic nuclear division	6	UBE2C, BIRC5, NUSAP1, PLK1, AURKA, ESPL1	450	44	52949	6.12666e-05	0.333045	0.000526138
biological_process	GO:0044774	mitotic DNA integrity checkpoint	8	CDKN1A, MDM2, TRIAP1, TOP2A, XPC, CCNA2, TICRR, CDK1	448	108	52885	6.14976e-05	0.334301	0.000527289
biological_process	GO:0048699	generation of neurons	31	ARPC5, CEBPB, DPYSL4, RTN4RL1, DPYSL2, ECT2, ACSL4, PLXNB2, FLRT2, KIF4A, ASPM, BLOC1S2, GRIN2C, RACGAP1, HMGB2, IL6, KITLG, NEFL, SERPINF1, PLXNB3, MEG3, RGMA, SHTN1, AURKA, WEE1, BTG2, KLF7, NRP1, NTN1, CDK1, CDC20	425	1550	51443	6.28552e-05	0.341681	0.00053808
biological_process	GO:0015031	protein transport	34	C15orf38-AP3S2, KIF20A, TOB1, CDKN1A, TACC3, TRIM3, CENPF, PLK3, RNF19B, ECT2, STOM, ARL6IP1, FYB, ANG, BIRC5, IL6, INHBB, KPNA2, ACHE, ASPH, ZDHHC9, VPS13C, LGR4, GOPC, PEX19, RANGAP1, SSR3, VAMP2, TAP1, UBE2G2, UCP2, DERL1, KIF18A, NKD2	422	1782	51211	6.53842e-05	0.355428	0.000558849
molecular_function	GO:0008270	zinc ion binding	25	TRIM3, DBF4, ADAMTS7, RNF19B, CRIP2, MIB2, RNF19A, ZNF385A, PHF19, APOBEC3C, UHRF1, BIRC5, MDM2, ZDHHC9, NEIL3, ZCCHC8, G2E3, RABGGTA, PJA1, TCEA1, ZFAND5, KLF7, TP53I3, TRAF4, MICAL2	431	1129	51864	6.70931e-05	0.364718	0.000572556
biological_process	GO:0031023	microtubule organizing center organization	8	GADD45A, KIF11, NEK2, PLK1, STIL, AURKA, CCNF, CDK1	448	110	52883	6.86064e-05	0.372945	0.000584553
cellular_component	GO:0000785	chromatin	14	CEBPB, CENPA, PLK3, E2F1, ZNF385A, UHRF1, H2AFX, HMGB2, INCENP, KIF22, PLK1, SUMO1, ANP32E, HIST1H2AC	442	404	52589	7.19128e-05	0.390918	0.000611765
cellular_component	GO:1902494	catalytic complex	23	CDKN1A, UBE2C, RNF19B, MIB2, DDB2, RNF19A, PHF19, GCLM, UBE2S, GTF2A1, NDUFA5, RRM2B, ZDHHC9, PRKAB1, POLD4, RABGGTA, SDF2, BUB1B, TBL1XR1, DCAF5, CCNF, FBXO44, CDC20	433	990	52003	7.21949e-05	0.392451	0.000613205
biological_process	GO:0055114	oxidation-reduction process	24	CYGB, COX15, ALDH3A1, FDXR, GPX1, ASPH, NDUFA5, RRM2B, RDH11, RETSAT, PPP1R3C, PRODH, CYP26B1, TIGAR, SCP2, VAMP2, TM7SF2, UCP2, SESN2, HSDL1, HPDL, STBD1, TP53I3, MICAL2	432	1064	51929	7.44344e-05	0.404625	0.000631241
biological_process	GO:0006323	DNA packaging	9	CENPA, NCAPH, NUSAP1, MIS18BP1, HJURP, NCAPG, TOP2A, CCNB1, NCAPD2	447	152	52841	7.49325e-05	0.407333	0.000634476
biological_process	GO:0007517	muscle organ development	13	CENPF, FBXO22, NUPR1, GPX1, IL6, SMAD7, MEF2D, ACHE, ATF3, MEG3, CYP26B1, BTG2, CCNB1	443	351	52642	7.81272e-05	0.4247	0.000660497
biological_process	GO:0042594	response to starvation	14	ADAMTS7, DDIT3, STOM, LSM4, FBXO22, INHBB, ATF3, PMAIP1, PRKAB1, TIGAR, UCP2, PPM1D, STBD1, TP53INP1	442	408	52585	7.91169e-05	0.43008	0.000667826
cellular_component	GO:0005886	plasma membrane	69	PTPRU, TBC1D3G, TGOLN2, LYPD1, RTN4RL1, KIF18B, FAM84B, DGKA, AK1, STOM, ALDH3A1, ICOSLG, CORO1C, PHLDA3, PLXNB2, FYB, NSG1, SLCO4A1, GRIN2C, RACGAP1, HMMR, FAS, IL6, CD82, SMAD7, MDM2, ARVCF, KITLG, ACHE, ASPH, PLXNB3, SEPT5, ERCC6L, SLC52A1, LGR4, SULF2, DIABLO, CLDND1, RGMA, GOPC, PEX19, RAP2B, EDA2R, RRAD, EPS8L2, LYNX1, VAMP2, TAP1, TM7SF2, SUMO1, XPC, ULBP1, TTYH3, PVRL4, NETO2, KIF18A, SLC…	387	4836	48157	7.9269e-05	0.430906	0.000668072
biological_process	GO:0042592	homeostatic process	30	CFL2, DDIT3, ISCU, GCLM, GPX1, HMGB2, BIRC5, FAS, IL6, SMAD7, KITLG, ASPH, PCNA, SERPINF1, PMAIP1, LGR4, SPATA7, CYP26B1, POLD4, GRHL3, TAP1, TCEA1, UCP2, DERL1, PIF1, TXNDC5, SESN2, SLC4A11, CCNB2, PTBP3	426	1479	51514	7.94276e-05	0.431768	0.000668372
biological_process	GO:0043241	protein complex disassembly	12	CFL2, KIF2C, MRPL10, KIF18B, MRPS27, ASPH, AURKA, KIF18A, CCNB1, AURKB, MICAL2, KIF14	444	298	52695	8.04316e-05	0.437226	0.000675775
cellular_component	GO:0031090	organelle membrane	48	PLA2G4B, ST6GALNAC2, OSBPL8, MRPL10, SPATA18, COX15, MANEAL, ECT2, HACD2, ACSL4, FDXR, MRPS27, ARL6IP1, NSG1, C1GALT1C1, ACER2, LMNB1, MDM2, ASPH, NDUFA5, CUZD1, RDH11, ZDHHC9, PMAIP1, RETSAT, ATAD3A, PRODH, CYP26B1, TMEM9B, TIGAR, GOPC, PEX19, RANGAP1, RAP2B, SDF2, CREB3L2, SSR3, VAMP2, TAP1, TM7SF2, SUMO1, UCP2, SLC35A2, DERL1, NLRX1, EBPL, STBD1, SLC25A46	408	2958	50035	8.31399e-05	0.451948	0.000697451
biological_process	GO:0000077	DNA damage checkpoint	9	CDKN1A, E2F1, H2AFX, MDM2, TRIAP1, PLK1, XPC, CCNA2, CDK1	447	155	52838	8.5322e-05	0.46381	0.000714654
cellular_component	GO:0016021	integral component of membrane	72	TVP23C-CDRT4, ST6GALNAC2, TGOLN2, PAQR4, RNF19B, KLHDC7A, COX15, MANEAL, HACD2, STOM, ACSL4, ARL6IP1, ASTN2, ICOSLG, PLXNB2, RNF19A, NSG1, SLCO4A1, GRIN2C, C1GALT1C1, ACER2, FAS, IL6, CD82, C4orf3, KITLG, ASPH, NINJ1, RDH11, ZDHHC9, PLXNB3, SLC52A1, ATAD3A, TMEM63B, LGR4, THSD1, DIABLO, CLDND1, TMEM9B, ADCK3, PEX19, EDA2R, CCDC90B, CREB3L2, SSR3, VAMP2, TAP1, TM7SF2, SLC35E2B, SUMO1, UCP2, SLC35A…	384	5159	47834	9.19769e-05	0.499986	0.00076921
biological_process	GO:0061024	membrane organization	23	OSBPL8, E2F1, STOM, ARL6IP1, FYB, NSG1, BLOC1S2, ZDHHC9, TRIAP1, PLK1, PMAIP1, PRKAB1, PEX19, SCP2, SSR3, VAMP2, SUMO1, TXNDC5, NKD2, CCNB1, CCNB2, NEK9, CDK1	433	1008	51985	9.29181e-05	0.505103	0.000775887
molecular_function	GO:0004672	protein kinase activity	17	CDKN1A, LOC102724428, PLK3, NEK2, PLK1, PRKAB1, AURKA, BUB1, BUB1B, TTK, WEE1, NRP1, CCNB1, DYRK1B, NEK9, AURKB, CDK1	439	599	52394	9.37266e-05	0.509498	0.000781439
biological_process	GO:0051256	mitotic spindle midzone assembly	4	KIF4A, RACGAP1, AURKB, KIF23	452	8	52985	9.61177e-05	0.522496	0.000800147
biological_process	GO:0006979	response to oxidative stress	13	CYGB, PLK3, KLF6, ECT2, SESN1, GCLM, GPX1, IL6, RRM2B, DIABLO, UCP2, SESN2, TP53INP1	443	360	52633	9.83496e-05	0.534628	0.000817475
biological_process	GO:0007163	establishment or maintenance of cell polarity	9	NDC80, CENPA, SPAG5, KIF2C, GPSM2, SPDL1, CYP26B1, SHTN1, WEE1	447	159	52834	0.000101006	0.549069	0.000838273
biological_process	GO:0060429	epithelium development	24	CDKN1A, CEBPB, PLXNB2, GPX1, GPSM2, HOXC13, IL6, SMAD7, KITLG, PCNA, PGF, LGR4, CYP26B1, RGMA, TIGAR, GRHL3, ACTA2, RAP2B, STIL, E2F8, NRP1, NTN1, MICAL2, CDK1	432	1088	51905	0.000102623	0.55786	0.000850396
biological_process	GO:0040001	establishment of mitotic spindle localization	5	NDC80, CENPA, GPSM2, NUSAP1, SPDL1	451	25	52968	0.000103993	0.565303	0.000860431
biological_process	GO:0016311	dephosphorylation	14	PTPRU, CDKN3, CDCA2, INPP1, ITPK1, PPP1R3C, PPP2R2C, TIGAR, NTPCR, PPM1D, RNGTT, DLGAP5, CDC25A, CDC25C	442	421	52572	0.000107021	0.581767	0.000884144
biological_process	GO:0051100	negative regulation of binding	8	ZFP90, DDIT3, E2F1, NEK2, PEX19, AURKA, SUMO1, AURKB	448	119	52874	0.0001094	0.5947	0.000901525
biological_process	GO:0032984	macromolecular complex disassembly	12	CFL2, KIF2C, MRPL10, KIF18B, MRPS27, ASPH, AURKA, KIF18A, CCNB1, AURKB, MICAL2, KIF14	444	309	52684	0.000109457	0.595007	0.000901525
molecular_function	GO:0001071	nucleic acid binding transcription factor activity	25	CEBPB, KLF6, ZFP90, DDIT3, E2F1, E2F2, ELF2, UHRF1, HMGB2, HOXA3, HOXC13, SMAD7, MEF2D, ATF3, NFIC, NRF1, ZBTB7A, GRHL3, CREB3L2, ZNF354A, ZNF79, BTG2, E2F8, KLF7, PTTG1	431	1136	51857	0.000117781	0.640256	0.000967154
molecular_function	GO:0003700	transcription factor activity, sequence-specific DNA binding	25	CEBPB, KLF6, ZFP90, DDIT3, E2F1, E2F2, ELF2, UHRF1, HMGB2, HOXA3, HOXC13, SMAD7, MEF2D, ATF3, NFIC, NRF1, ZBTB7A, GRHL3, CREB3L2, ZNF354A, ZNF79, BTG2, E2F8, KLF7, PTTG1	431	1136	51857	0.000117781	0.640256	0.000967154
cellular_component	GO:0031461	cullin-RING ubiquitin ligase complex	8	UBE2C, DDB2, UBE2S, BUB1B, DCAF5, CCNF, FBXO44, CDC20	448	122	52871	0.000126716	0.688828	0.00103896
biological_process	GO:0051488	activation of anaphase-promoting complex activity	4	UBE2C, UBE2S, PLK1, CDC20	452	9	52984	0.000127347	0.692257	0.00104256
cellular_component	GO:0044429	mitochondrial part	21	PLA2G4B, MRPL10, SPATA18, COX15, ACSL4, FDXR, MRPS27, ISCU, GPX1, NDUFA5, AK3, TRIAP1, PMAIP1, ATAD3A, PRODH, DIABLO, TIGAR, UCP2, NLRX1, MTERF2, SLC25A46	435	891	52102	0.000133733	0.726973	0.00109319
biological_process	GO:0009267	cellular response to starvation	13	ADAMTS7, STOM, LSM4, FBXO22, INHBB, ATF3, PMAIP1, PRKAB1, TIGAR, UCP2, PPM1D, STBD1, TP53INP1	443	374	52619	0.000138712	0.754038	0.00113219
biological_process	GO:2000060	positive regulation of protein ubiquitination involved in ubiquitin-dependent protein catabolic process	7	UBE2C, FBXO22, FBXO5, PLK1, CCNB1, CDK1, CDC20	449	86	52907	0.000141592	0.769696	0.00115224
biological_process	GO:0051101	regulation of DNA binding	7	ZFP90, DDIT3, E2F1, HMGB2, NEK2, HJURP, SUMO1	449	86	52907	0.000141592	0.769696	0.00115224
cellular_component	GO:0005783	endoplasmic reticulum	30	ADAMTS7, OSBPL8, HACD2, STOM, ALDH3A1, ACSL4, ARL6IP1, ASPH, RDH11, ZDHHC9, RETSAT, SULF2, CYP26B1, RGMA, LDAH, SDF2, CREB3L2, SSR3, TAP1, TM7SF2, UBE2G2, SLC35A2, DERL1, ARSJ, ULBP1, TXNDC5, EBPL, CES2, STBD1, SEP15	426	1566	51427	0.000144446	0.785206	0.0011737
biological_process	GO:1902041	regulation of extrinsic apoptotic signaling pathway via death domain receptors	6	GPX1, HMGB2, FAS, ATF3, PMAIP1, TNFRSF10B	450	54	52939	0.000150014	0.815474	0.00121712
biological_process	GO:0051294	establishment of spindle orientation	5	NDC80, CENPA, SPAG5, GPSM2, SPDL1	451	28	52965	0.000154304	0.838797	0.00125007
biological_process	GO:0031638	zymogen activation	8	CYFIP2, ACER2, FAS, ASPH, CUZD1, PMAIP1, DIABLO, TNFRSF10B	448	127	52866	0.000160472	0.872326	0.0012981
molecular_function	GO:0004721	phosphoprotein phosphatase activity	9	PTPRU, CDKN3, HACD2, PPP1R3C, PPM1D, RNGTT, DLGAP5, CDC25A, CDC25C	447	171	52822	0.00016298	0.885961	0.00131644
biological_process	GO:0048666	neuron development	25	ARPC5, DPYSL4, RTN4RL1, DPYSL2, ACSL4, PLXNB2, FLRT2, KIF4A, BLOC1S2, GRIN2C, IL6, KITLG, NEFL, SERPINF1, PLXNB3, MEG3, RGMA, SHTN1, AURKA, WEE1, BTG2, KLF7, NRP1, NTN1, CDC20	431	1184	51809	0.000164466	0.894035	0.00132235
biological_process	GO:0051255	spindle midzone assembly	4	KIF4A, RACGAP1, AURKB, KIF23	452	10	52983	0.000164505	0.894247	0.00132235
biological_process	GO:0034501	protein localization to kinetochore	4	SPDL1, BUB1B, AURKB, CDK1	452	10	52983	0.000164505	0.894247	0.00132235
molecular_function	GO:0016491	oxidoreductase activity	18	CYGB, COX15, ALDH3A1, FDXR, BLOC1S2, GPX1, ASPH, NDUFA5, RRM2B, RDH11, RETSAT, PRODH, CYP26B1, TM7SF2, HSDL1, HPDL, TP53I3, MICAL2	438	697	52296	0.000164685	0.895228	0.00132235
biological_process	GO:0031668	cellular response to extracellular stimulus	14	CDKN1A, ADAMTS7, STOM, LSM4, FBXO22, INHBB, ATF3, PMAIP1, PRKAB1, TIGAR, UCP2, PPM1D, STBD1, TP53INP1	442	441	52552	0.000166454	0.904842	0.00133457
biological_process	GO:0042326	negative regulation of phosphorylation	13	CDKN1A, CDKN2C, UBE2C, GADD45A, CORO1C, IGFBP3, IL6, SMAD7, ATF3, PLK1, TIGAR, SH3BP5L, CCNB1	443	382	52611	0.000167596	0.911051	0.00134175
biological_process	GO:0051785	positive regulation of nuclear division	6	UBE2C, BIRC5, NUSAP1, PLK1, AURKA, ESPL1	450	56	52937	0.000175796	0.955628	0.00140534
biological_process	GO:0019882	antigen processing and presentation	10	CENPE, KIF2C, KIF4A, RACGAP1, KIF11, KIF22, KIF15, TAP1, KIF18A, KIF23	446	222	52771	0.000181595	0.987149	0.00144956
biological_process	GO:0070201	regulation of establishment of protein localization	19	CDKN1A, TACC3, PLK3, E2F1, ECT2, STOM, ANG, BIRC5, IL6, INHBB, ACHE, ASPH, PMAIP1, LGR4, RANGAP1, VAMP2, UBE2G2, UCP2, NKD2	437	774	52219	0.000188632	1	0.00150352
biological_process	GO:0009416	response to light stimulus	12	CDKN1A, DDB2, GPX1, RDH11, PCNA, TRIAP1, PMAIP1, POLH, XPC, AURKB, TP53INP1, CDC25A	444	332	52661	0.00019986	1	0.00159069
biological_process	GO:0007276	gamete generation	16	E2F1, ASPM, GAMT, FBXO5, RACGAP1, H2AFX, HMGB2, INHBB, KIFC1, LGR4, SPATA7, CYP26B1, AURKA, CCNB1, PTTG1, CDC25C	440	576	52417	0.000200568	1	0.00159399
biological_process	GO:0048585	negative regulation of response to stimulus	26	TOB1, DDIT3, PHLDA3, ZNF385A, GCLM, GPX1, HMGB2, SMAD7, MDM2, ATF3, RRM2B, TRIAP1, SERPINF1, LGR4, MEG3, G2E3, SULF2, CYP26B1, TIGAR, TAP1, UBE2G2, UCP2, CHAC1, NLRX1, NKD2, NRP1	430	1290	51703	0.000204497	1	0.00162284
biological_process	GO:0052547	regulation of peptidase activity	13	CYFIP2, GPX1, BIRC5, ACER2, FAS, IL6, ASPH, TRIAP1, SERPINF1, PMAIP1, DIABLO, TNFRSF10B, PTTG1	443	391	52602	0.00020609	1	0.0016331
biological_process	GO:0007076	mitotic chromosome condensation	4	NCAPH, NUSAP1, NCAPG, NCAPD2	452	11	52982	0.000208047	1	0.00164381
biological_process	GO:0000212	meiotic spindle organization	4	ASPM, FBXO5, AURKA, ESPL1	452	11	52982	0.000208047	1	0.00164381
biological_process	GO:0010638	positive regulation of organelle organization	15	ARPC4-TTLL3, ARPC5, CFL2, UBE2C, E2F1, PHF19, BIRC5, ARPIN, NUSAP1, PLK1, PMAIP1, AURKA, PSRC1, CCNB1, ESPL1	441	514	52479	0.000208642	1	0.00164612
biological_process	GO:0032989	cellular component morphogenesis	29	ARPC5, DPYSL4, CFL2, DPYSL2, ECT2, CORO1C, PLXNB2, FLRT2, KIF4A, ZNF385A, GRIN2C, C1GALT1C1, ARPIN, IL6, SMAD7, KITLG, NEFL, PLXNB3, MEG3, RGMA, SHTN1, STIL, AURKA, WEE1, FAM83D, KLF7, NRP1, NTN1, KIF14	427	1522	51471	0.000209008	1	0.00164662
biological_process	GO:0044802	single-organism membrane organization	20	OSBPL8, E2F1, STOM, ARL6IP1, FYB, BLOC1S2, ZDHHC9, TRIAP1, PLK1, PMAIP1, PEX19, SCP2, SSR3, VAMP2, SUMO1, NKD2, CCNB1, CCNB2, NEK9, CDK1	436	852	52141	0.000211687	1	0.00166531
biological_process	GO:0030182	neuron differentiation	28	ARPC5, CEBPB, DPYSL4, RTN4RL1, DPYSL2, ECT2, ACSL4, PLXNB2, FLRT2, KIF4A, ASPM, BLOC1S2, GRIN2C, IL6, KITLG, NEFL, SERPINF1, PLXNB3, MEG3, RGMA, SHTN1, AURKA, WEE1, BTG2, KLF7, NRP1, NTN1, CDC20	428	1436	51557	0.000217204	1	0.00170624
biological_process	GO:0051604	protein maturation	12	ISCU, CYFIP2, BIRC5, ACER2, FAS, ASPH, CUZD1, PMAIP1, DIABLO, CHAC1, NKD2, TNFRSF10B	444	336	52657	0.000220732	1	0.00173145
biological_process	GO:0000902	cell morphogenesis	28	ARPC5, DPYSL4, DPYSL2, ECT2, CORO1C, PLXNB2, FLRT2, KIF4A, ZNF385A, GRIN2C, C1GALT1C1, ARPIN, IL6, SMAD7, KITLG, NEFL, PLXNB3, MEG3, RGMA, SHTN1, STIL, AURKA, WEE1, FAM83D, KLF7, NRP1, NTN1, KIF14	428	1444	51549	0.000230171	1	0.00180289
biological_process	GO:0051443	positive regulation of ubiquitin-protein transferase activity	7	UBE2C, FBXO5, UBE2S, PLK1, CCNB1, CDK1, CDC20	449	95	52898	0.000236005	1	0.00184328
biological_process	GO:2000058	regulation of protein ubiquitination involved in ubiquitin-dependent protein catabolic process	7	UBE2C, FBXO22, FBXO5, PLK1, CCNB1, CDK1, CDC20	449	95	52898	0.000236005	1	0.00184328
cellular_component	GO:0005657	replication fork	6	UHRF1, H2AFX, PCNA, MCM10, POLD4, PIF1	450	61	52932	0.00025505	1	0.00198917
biological_process	GO:0002520	immune system development	19	TACC3, CEBPB, CRIP2, ZNF385A, HMGB2, HOXA3, FAS, IL6, KITLG, ZBTB7A, ANLN, GPATCH4, CYP26B1, TCEA1, TOP2A, UNG, TNFSF9, CCNB2, PTBP3	437	795	52198	0.000258322	1	0.00200893
biological_process	GO:0045597	positive regulation of cell differentiation	19	CEBPB, ECT2, PLXNB2, ASPM, ZNF385A, HMGB2, IGFBP3, IL6, KITLG, NEFL, SERPINF1, MEG3, CYP26B1, SHTN1, AURKA, TNFSF9, NRP1, NTN1, GDF15	437	795	52198	0.000258322	1	0.00200893
molecular_function	GO:0030695	GTPase regulator activity	11	TBC1D3G, ECT2, RACGAP1, GPSM2, DEPDC1, DEPDC1B, RALGDS, RANGAP1, ARHGAP11B, ARHGAP29, ARHGAP11A	445	287	52706	0.000262641	1	0.0020396
biological_process	GO:0033993	response to lipid	19	PTPRU, CDKN1A, CEBPB, E2F1, ALDH3A1, GPX1, HMGB2, ACER2, FAS, IL6, NEFL, NRF1, PCNA, SERPINF1, CYP26B1, AURKA, UCP2, CCNA2, CCNB1	437	797	52196	0.000266003	1	0.00206275
biological_process	GO:0010243	response to organonitrogen compound	21	CDKN1A, CEBPB, OSBPL8, KLF6, DPYSL2, ALDH3A1, GPX1, GRIN2C, IL6, INHBB, KITLG, ASPH, NEFL, NRF1, PRKAB1, RANGAP1, VAMP2, UCP2, BTG2, SESN2, CCNA2	435	941	52052	0.0002675	1	0.00207141
biological_process	GO:0030308	negative regulation of cell growth	8	CDKN1A, CDKN2C, SERTAD1, RGMA, RRAD, PSRC1, NRP1, NTN1	448	139	52854	0.000271714	1	0.00210105
biological_process	GO:0001933	negative regulation of protein phosphorylation	12	CDKN1A, CDKN2C, UBE2C, GADD45A, CORO1C, IGFBP3, IL6, SMAD7, ATF3, PLK1, SH3BP5L, CCNB1	444	345	52648	0.000274518	1	0.00211971
biological_process	GO:0071495	cellular response to endogenous stimulus	25	TOB1, CDKN1A, CEBPB, ADAMTS7, OSBPL8, KLF6, E2F1, GRIN2C, IL6, INHBB, SMAD7, MDM2, KITLG, NEFL, SERPINF1, PGF, PRKAB1, SULF2, RGMA, TIGAR, RANGAP1, VAMP2, UCP2, SHCBP1, GDF15	431	1241	51752	0.000283491	1	0.0021859
molecular_function	GO:0005102	receptor binding	27	TOB1, CEBPB, ICOSLG, FYB, NSG1, ANG, HMGB2, IL6, IL11, INHBB, SMAD7, KITLG, PCNA, PGF, RGMA, SCP2, TAP1, CHAC1, DERL1, ULBP1, PVRL4, NETO2, TNFSF9, CCNB1, GDF15, TRAF4, CD70	429	1380	51613	0.000290329	1	0.00223545
biological_process	GO:0097202	activation of cysteine-type endopeptidase activity	7	CYFIP2, ACER2, FAS, ASPH, PMAIP1, DIABLO, TNFRSF10B	449	99	52894	0.000291272	1	0.00223954
biological_process	GO:2001235	positive regulation of apoptotic signaling pathway	9	DDIT3, E2F1, FAS, INHBB, ATF3, PMAIP1, BUB1, TNFRSF10B, TP53INP1	447	188	52805	0.000301433	1	0.00231439
biological_process	GO:0044703	multi-organism reproductive process	20	E2F1, ACSL4, ASPM, GAMT, FBXO5, RACGAP1, H2AFX, HMGB2, INHBB, KIFC1, PGF, LGR4, SPATA7, CYP26B1, AURKA, UCP2, CCNB1, PTTG1, CDK1, CDC25C	436	878	52115	0.000304669	1	0.00233594
biological_process	GO:0010212	response to ionizing radiation	8	CDKN1A, GADD45A, ECT2, GPX1, H2AFX, PMAIP1, TIGAR, TICRR	448	144	52849	0.000333333	1	0.00255211
biological_process	GO:1902533	positive regulation of intracellular signal transduction	21	OSBPL8, MIB2, GADD45A, DDIT3, ECT2, ZNF385A, GPX1, GRIN2C, IGFBP3, IL6, IL11, KITLG, NEFL, PMAIP1, TMEM9B, EDA2R, BUB1, TNFRSF10B, NRP1, TRAF4, CDK1	435	959	52034	0.000338644	1	0.00258913
biological_process	GO:0014070	response to organic cyclic compound	19	PTPRU, CDKN1A, KLF6, DPYSL2, ALDH3A1, GPX1, HMGB2, FAS, IL6, MKI67, ASPH, NEFL, NRF1, SERPINF1, PMAIP1, AURKA, BTG2, CCNA2, CCNB1	437	814	52179	0.000339733	1	0.00259366
biological_process	GO:0031669	cellular response to nutrient levels	13	ADAMTS7, STOM, LSM4, FBXO22, INHBB, ATF3, PMAIP1, PRKAB1, TIGAR, UCP2, PPM1D, STBD1, TP53INP1	443	414	52579	0.000340191	1	0.00259366
molecular_function	GO:0042393	histone binding	8	PHF19, UHRF1, H2AFX, HJURP, SFMBT2, TBL1XR1, ANP32E, NCAPD2	448	145	52848	0.000346904	1	0.00264113
biological_process	GO:0060537	muscle tissue development	12	CENPF, FBXO22, NUPR1, GPX1, SMAD7, MEF2D, ATF3, MEG3, CYP26B1, ZFAND5, BTG2, CCNB1	444	356	52637	0.000354889	1	0.00269815
biological_process	GO:0048534	hematopoietic or lymphoid organ development	18	TACC3, CEBPB, CRIP2, ZNF385A, HMGB2, HOXA3, FAS, IL6, KITLG, ZBTB7A, ANLN, GPATCH4, CYP26B1, TCEA1, TOP2A, TNFSF9, CCNB2, PTBP3	438	748	52245	0.000364291	1	0.00276576
biological_process	GO:0032467	positive regulation of cytokinesis	5	ECT2, RACGAP1, AURKB, KIF23, KIF14	451	36	52957	0.000371643	1	0.00281764
cellular_component	GO:0005740	mitochondrial envelope	17	PLA2G4B, MRPL10, SPATA18, COX15, ACSL4, FDXR, MRPS27, NDUFA5, TRIAP1, PMAIP1, ATAD3A, PRODH, DIABLO, TIGAR, UCP2, NLRX1, SLC25A46	439	680	52313	0.00037312	1	0.0028249
biological_process	GO:2001242	regulation of intrinsic apoptotic signaling pathway	8	DDIT3, ZNF385A, GPX1, RRM2B, TRIAP1, PMAIP1, G2E3, BUB1	448	147	52846	0.000375372	1	0.002838
biological_process	GO:0000904	cell morphogenesis involved in differentiation	22	ARPC5, DPYSL4, DPYSL2, CORO1C, PLXNB2, FLRT2, KIF4A, ZNF385A, GRIN2C, C1GALT1C1, SMAD7, KITLG, NEFL, PLXNB3, MEG3, RGMA, SHTN1, FAM83D, KLF7, NRP1, NTN1, KIF14	434	1009	51984	0.000386525	1	0.00291826
biological_process	GO:0043491	protein kinase B signaling	8	OSBPL8, PLK3, DDIT3, PHLDA3, SESN1, GPX1, IL6, SESN2	448	148	52845	0.00039029	1	0.0029426
biological_process	GO:0021987	cerebral cortex development	7	TACC3, ASPM, H2AFX, NEFL, NRP1, ARHGAP11B, KIF14	449	105	52888	0.000392663	1	0.00295639
biological_process	GO:0043087	regulation of GTPase activity	15	TBC1D3G, ECT2, CORO1C, PLXNB2, RACGAP1, PLXNB3, DEPDC1, DEPDC1B, GRHL3, RALGDS, RANGAP1, EPS8L2, ARHGEF39, ARHGAP29, ARHGAP11A	441	551	52442	0.000410939	1	0.00308972
biological_process	GO:0033674	positive regulation of kinase activity	16	CDKN1A, CENPE, OSBPL8, GADD45A, ECT2, TPX2, ANG, GRIN2C, KITLG, NEFL, TIGAR, STIL, PSRC1, TRAF4, CDK1, KIF14	440	618	52375	0.00041239	1	0.00309634
biological_process	GO:1901698	response to nitrogen compound	22	CDKN1A, CEBPB, OSBPL8, KLF6, DPYSL2, ALDH3A1, GPX1, GRIN2C, IL6, INHBB, KITLG, ASPH, NEFL, NRF1, PMAIP1, PRKAB1, RANGAP1, VAMP2, UCP2, BTG2, SESN2, CCNA2	434	1024	51969	0.000421961	1	0.00316384
biological_process	GO:0006886	intracellular protein transport	22	C15orf38-AP3S2, TOB1, CDKN1A, TACC3, PLK3, ECT2, STOM, ARL6IP1, FYB, IL6, KPNA2, ASPH, ZDHHC9, VPS13C, PEX19, RANGAP1, SSR3, VAMP2, TAP1, UBE2G2, DERL1, NKD2	434	1027	51966	0.000430388	1	0.00322258
biological_process	GO:0021543	pallium development	8	TACC3, ASPM, H2AFX, NEFL, BTG2, NRP1, ARHGAP11B, KIF14	448	151	52842	0.00043791	1	0.00327438
biological_process	GO:0051960	regulation of nervous system development	17	DPYSL2, ECT2, PLXNB2, FLRT2, ASPM, HMGB2, IL6, NEFL, SERPINF1, RGMA, SHTN1, GRHL3, NRP1, NTN1, CDK1, CDC20, KIF14	439	692	52301	0.000448759	1	0.0033509
molecular_function	GO:0016874	ligase activity	13	UBE2C, RNF19B, MIB2, ACSL4, RNF19A, GCLM, UBE2S, UHRF1, MDM2, NADSYN1, G2E3, PJA1, UBE2G2	443	428	52565	0.000453428	1	0.00338112
biological_process	GO:0052548	regulation of endopeptidase activity	12	CYFIP2, GPX1, BIRC5, ACER2, FAS, IL6, ASPH, TRIAP1, SERPINF1, PMAIP1, DIABLO, TNFRSF10B	444	370	52623	0.000484972	1	0.00361138
biological_process	GO:0043281	regulation of cysteine-type endopeptidase activity involved in apoptotic process	9	GPX1, BIRC5, ACER2, FAS, IL6, TRIAP1, PMAIP1, DIABLO, TNFRSF10B	447	203	52790	0.00049222	1	0.00366034
molecular_function	GO:0060589	nucleoside-triphosphatase regulator activity	11	TBC1D3G, ECT2, RACGAP1, GPSM2, DEPDC1, DEPDC1B, RALGDS, RANGAP1, ARHGAP11B, ARHGAP29, ARHGAP11A	445	312	52681	0.000494906	1	0.00367529
biological_process	GO:0007411	axon guidance	15	ARPC5, DPYSL4, DPYSL2, FLRT2, KIF4A, GRIN2C, KITLG, NEFL, PLXNB3, MEG3, RGMA, SHTN1, KLF7, NRP1, NTN1	441	562	52431	0.00049661	1	0.00367789
biological_process	GO:0097485	neuron projection guidance	15	ARPC5, DPYSL4, DPYSL2, FLRT2, KIF4A, GRIN2C, KITLG, NEFL, PLXNB3, MEG3, RGMA, SHTN1, KLF7, NRP1, NTN1	441	562	52431	0.00049661	1	0.00367789
biological_process	GO:0016485	protein processing	11	CYFIP2, BIRC5, ACER2, FAS, ASPH, CUZD1, PMAIP1, DIABLO, CHAC1, NKD2, TNFRSF10B	445	313	52680	0.000506923	1	0.00374916
molecular_function	GO:0004674	protein serine/threonine kinase activity	13	LOC102724428, PLK3, NEK2, PLK1, PRKAB1, AURKA, BUB1, BUB1B, TTK, DYRK1B, NEK9, AURKB, CDK1	443	435	52558	0.00052103	1	0.00384766
cellular_component	GO:0044815	DNA packaging complex	6	CENPA, NCAPH, H2AFX, NCAPG, HIST1H2AC, NCAPD2	450	72	52921	0.000522365	1	0.00384766
biological_process	GO:0051437	positive regulation of ubiquitin-protein ligase activity involved in regulation of mitotic cell cycle transition	6	UBE2C, FBXO5, PLK1, CCNB1, CDK1, CDC20	450	72	52921	0.000522365	1	0.00384766
cellular_component	GO:0035371	microtubule plus-end	4	SPAG5, KIF2C, KIF18B, KNSTRN	452	16	52977	0.000536588	1	0.00394708
cellular_component	GO:0042995	cell projection	31	ARPC5, CYGB, PLK3, SPATA18, DPYSL2, AK1, TPX2, CORO1C, ZNF385A, CYFIP2, ANG, GRIN2C, ARPIN, NEFL, SERPINF1, SEPT5, SPATA7, GOPC, SHTN1, PEX19, ACTA2, RALGDS, RANGAP1, EPS8L2, LYNX1, AURKA, VAMP2, TPM3, SUMO1, KIF18A, NRP1	425	1765	51228	0.000546978	1	0.00401807
biological_process	GO:0006397	mRNA processing	13	C7orf55-LUC7L2, TOB1, HNRNPA1L2, LSM4, ZCCHC8, SMN1, SMN2, SNRPN, BTG2, SLBP, RNGTT, CCNB1, PTBP3	443	438	52555	0.000552495	1	0.00405312
biological_process	GO:0007077	mitotic nuclear envelope disassembly	5	PLK1, CCNB1, CCNB2, NEK9, CDK1	451	41	52952	0.000585927	1	0.00429259
biological_process	GO:2001236	regulation of extrinsic apoptotic signaling pathway	8	GCLM, GPX1, HMGB2, FAS, ATF3, PMAIP1, TNFRSF10B, NRP1	448	159	52834	0.000587858	1	0.00430094
biological_process	GO:0080134	regulation of response to stress	26	GADD45A, DDIT3, STOM, LSM4, ZNF385A, SESN1, GPX1, IL6, MDM2, PCNA, TRIAP1, SERPINF1, PMAIP1, POLH, LGR4, TIGAR, EDA2R, SDF2, VAMP2, TAP1, UBE2G2, SUMO1, NLRX1, SESN2, YPEL3, TRAF4	430	1385	51608	0.000603002	1	0.0044058
cellular_component	GO:0044432	endoplasmic reticulum part	22	ADAMTS7, OSBPL8, HACD2, ACSL4, ARL6IP1, ASPH, RDH11, ZDHHC9, RETSAT, CYP26B1, SDF2, CREB3L2, SSR3, TAP1, TM7SF2, DERL1, ARSJ, TXNDC5, EBPL, CES2, STBD1, SEP15	434	1073	51920	0.000623746	1	0.0045461
biological_process	GO:0010256	endomembrane system organization	14	OSBPL8, PLK3, FYB, ZNF385A, PLK1, SHTN1, SCP2, VAMP2, SUMO1, NKD2, CCNB1, CCNB2, NEK9, CDK1	442	509	52484	0.000623877	1	0.0045461
molecular_function	GO:0008574	ATP-dependent microtubule motor activity, plus-end-directed	4	KIF18B, KIF11, KIF18A, KIF14	452	17	52976	0.000627302	1	0.00456495
biological_process	GO:0006986	response to unfolded protein	8	PLA2G4B, DDIT3, HSPA4L, ATF3, SDF2, CREB3L2, CHAC1, DERL1	448	161	52832	0.000631065	1	0.00458619
biological_process	GO:0019953	sexual reproduction	17	E2F1, ASPM, GAMT, FBXO5, RACGAP1, H2AFX, HMGB2, INHBB, KIFC1, LGR4, SPATA7, CYP26B1, AURKA, CCNB1, PTTG1, CDK1, CDC25C	439	717	52276	0.000649536	1	0.00471412
biological_process	GO:0030397	membrane disassembly	5	PLK1, CCNB1, CCNB2, NEK9, CDK1	451	43	52950	0.000692095	1	0.00500963
biological_process	GO:0051081	nuclear envelope disassembly	5	PLK1, CCNB1, CCNB2, NEK9, CDK1	451	43	52950	0.000692095	1	0.00500963
molecular_function	GO:0003779	actin binding	12	ARPC5, CFL2, MIB2, CORO1C, ANG, GAS2L3, ANLN, SHTN1, EPS8L2, TPM3, KIF18A, MICAL2	444	387	52606	0.000694372	1	0.00501942
cellular_component	GO:0097149	centralspindlin complex	3	ECT2, RACGAP1, KIF23	453	3	52990	0.000710943	1	0.00513238
molecular_function	GO:0000982	transcription factor activity, RNA polymerase II core promoter proximal region sequence-specific binding	11	CEBPB, ZFP90, DDIT3, HOXC13, ATF3, NFIC, NRF1, ZBTB7A, CREB3L2, BTG2, E2F8	445	329	52664	0.000734578	1	0.00529597
biological_process	GO:0040008	regulation of growth	15	CDKN1A, CDKN2C, DPYSL2, ACSL4, GAMT, SERTAD1, IGFBP3, RGMA, SHTN1, RRAD, PSRC1, NRP1, CCNB1, NTN1, KIF14	441	587	52406	0.000749342	1	0.00539526
biological_process	GO:0007167	enzyme linked receptor protein signaling pathway	24	ARPC5, TOB1, CDKN1A, OSBPL8, ECT2, CYFIP2, GRIN2C, IGFBP3, INHBB, SMAD7, MDM2, KITLG, NEFL, PGF, MEG3, PRKAB1, SULF2, RGMA, RALGDS, TTK, ZFAND5, SHCBP1, NRP1, GDF15	432	1219	51774	0.000751589	1	0.00540428
biological_process	GO:0090066	regulation of anatomical structure size	13	ARPC4-TTLL3, ARPC5, CFL2, DPYSL2, GCLM, GPX1, ARPIN, NEFL, RGMA, SHTN1, ACTA2, NRP1, NTN1	443	455	52538	0.000762554	1	0.00547588
biological_process	GO:0007283	spermatogenesis	13	E2F1, ASPM, GAMT, RACGAP1, H2AFX, HMGB2, KIFC1, LGR4, SPATA7, CYP26B1, CCNB1, PTTG1, CDC25C	443	457	52536	0.000791157	1	0.00567379
biological_process	GO:0045860	positive regulation of protein kinase activity	15	CDKN1A, CENPE, OSBPL8, GADD45A, ECT2, TPX2, ANG, GRIN2C, KITLG, NEFL, STIL, PSRC1, TRAF4, CDK1, KIF14	441	591	52402	0.000798459	1	0.00571108
molecular_function	GO:0019904	protein domain specific binding	15	TACC3, DDIT3, GPX1, HMGB2, HOXA3, NEFL, PLXNB3, RAP2B, SHCBP1, SH3BP5L, PTTG1, ARHGAP29, TRAF4, KIF14, CDC25C	441	591	52402	0.000798459	1	0.00571108
biological_process	GO:0007519	skeletal muscle tissue development	8	FBXO22, NUPR1, GPX1, MEF2D, ATF3, MEG3, CYP26B1, BTG2	448	168	52825	0.000802498	1	0.00573243
biological_process	GO:0048232	male gamete generation	13	E2F1, ASPM, GAMT, RACGAP1, H2AFX, HMGB2, KIFC1, LGR4, SPATA7, CYP26B1, CCNB1, PTTG1, CDC25C	443	458	52535	0.000805792	1	0.0057484
biological_process	GO:0043623	cellular protein complex assembly	13	ARPC4-TTLL3, ARPC5, CENPA, UBE2C, COX15, FBXO5, NSG1, UBE2S, ANG, NEFL, ANLN, TUBA4A, PSRC1	443	461	52532	0.000851058	1	0.00606337
biological_process	GO:0009968	negative regulation of signal transduction	21	TOB1, DDIT3, PHLDA3, ZNF385A, GCLM, GPX1, HMGB2, SMAD7, MDM2, ATF3, RRM2B, TRIAP1, LGR4, MEG3, G2E3, SULF2, CYP26B1, CHAC1, NLRX1, NKD2, NRP1	435	1023	51970	0.000865019	1	0.00614684
biological_process	GO:0048145	regulation of fibroblast proliferation	6	CDKN1A, E2F1, NUPR1, PMAIP1, CCNA2, CCNB1	450	81	52912	0.000865036	1	0.00614684
biological_process	GO:0043392	negative regulation of DNA binding	5	ZFP90, DDIT3, E2F1, NEK2, SUMO1	451	46	52947	0.000875856	1	0.0062156
biological_process	GO:0000122	negative regulation of transcription from RNA polymerase II promoter	17	MXD4, PLK3, ZFP90, DDIT3, E2F1, PHF19, UHRF1, SMAD7, MDM2, ATF3, NFIC, ZBTB7A, PLK1, BTG2, TBL1XR1, E2F8, AURKB	439	739	52254	0.000885389	1	0.00627506
biological_process	GO:0051258	protein polymerization	9	ARPC4-TTLL3, ARPC5, UBE2C, FBXO5, UBE2S, ANG, NEFL, TUBA4A, PSRC1	447	223	52770	0.000887839	1	0.00628423
biological_process	GO:0035966	response to topologically incorrect protein	8	PLA2G4B, DDIT3, HSPA4L, ATF3, SDF2, CREB3L2, CHAC1, DERL1	448	172	52821	0.000915807	1	0.00647377
biological_process	GO:0050767	regulation of neurogenesis	15	DPYSL2, ECT2, PLXNB2, FLRT2, ASPM, HMGB2, IL6, NEFL, SERPINF1, RGMA, SHTN1, NRP1, NTN1, CDK1, CDC20	441	601	52392	0.000933285	1	0.00658875
biological_process	GO:0007265	Ras protein signal transduction	14	CDKN1A, ECT2, GRIN2C, KITLG, NEFL, SHTN1, RALGDS, RAP2B, EPS8L2, ARHGEF39, CCNA2, ARHGAP29, NTN1, KIF14	442	533	52460	0.000939462	1	0.00662375
molecular_function	GO:0044212	transcription regulatory region DNA binding	18	CEBPB, GADD45A, DDIT3, E2F1, E2F2, UHRF1, HMGB2, SMAD7, MEF2D, ATF3, NFIC, NRF1, ZBTB7A, CREB3L2, ZNF79, TBL1XR1, E2F8, MTERF2	438	818	52175	0.000957811	1	0.00674438
biological_process	GO:0048144	fibroblast proliferation	6	CDKN1A, E2F1, NUPR1, PMAIP1, CCNA2, CCNB1	450	83	52910	0.000959681	1	0.00674881
biological_process	GO:0051056	regulation of small GTPase mediated signal transduction	10	ECT2, RACGAP1, KITLG, DEPDC1B, EPS8L2, ARHGEF39, ARHGAP11B, ARHGAP29, ARHGAP11A, KIF14	446	282	52711	0.00096168	1	0.00675413
biological_process	GO:0014706	striated muscle tissue development	11	CENPF, FBXO22, NUPR1, GPX1, SMAD7, MEF2D, ATF3, MEG3, CYP26B1, BTG2, CCNB1	445	342	52651	0.000976352	1	0.00684832
biological_process	GO:0021537	telencephalon development	9	TACC3, DPYSL2, ASPM, H2AFX, NEFL, BTG2, NRP1, ARHGAP11B, KIF14	447	227	52766	0.000991289	1	0.00693519
biological_process	GO:0048872	homeostasis of number of cells	9	HMGB2, FAS, IL6, KITLG, PMAIP1, LGR4, TCEA1, CCNB2, PTBP3	447	227	52766	0.000991289	1	0.00693519
molecular_function	GO:0000975	regulatory region DNA binding	18	CEBPB, GADD45A, DDIT3, E2F1, E2F2, UHRF1, HMGB2, SMAD7, MEF2D, ATF3, NFIC, NRF1, ZBTB7A, CREB3L2, ZNF79, TBL1XR1, E2F8, MTERF2	438	822	52171	0.00100832	1	0.00703621
molecular_function	GO:0001067	regulatory region nucleic acid binding	18	CEBPB, GADD45A, DDIT3, E2F1, E2F2, UHRF1, HMGB2, SMAD7, MEF2D, ATF3, NFIC, NRF1, ZBTB7A, CREB3L2, ZNF79, TBL1XR1, E2F8, MTERF2	438	822	52171	0.00100832	1	0.00703621
biological_process	GO:0006289	nucleotide-excision repair	6	DDB2, PCNA, NEIL3, POLD4, TCEA1, XPC	450	84	52909	0.00100979	1	0.00703745
biological_process	GO:0048545	response to steroid hormone	12	PTPRU, CDKN1A, ALDH3A1, GPX1, HMGB2, FAS, IL6, NEFL, NRF1, SERPINF1, AURKA, CCNA2	444	406	52587	0.00101234	1	0.00704619
biological_process	GO:0061564	axon development	17	ARPC5, DPYSL4, RTN4RL1, DPYSL2, PLXNB2, FLRT2, KIF4A, GRIN2C, KITLG, NEFL, PLXNB3, MEG3, RGMA, SHTN1, KLF7, NRP1, NTN1	439	749	52244	0.00101459	1	0.00705285
biological_process	GO:0071897	DNA biosynthetic process	7	CDKN1A, CENPF, PCNA, POLH, MEG3, POLD4, PIF1	449	127	52866	0.00101703	1	0.00706075
biological_process	GO:0009636	response to toxic substance	8	CDKN1A, NUPR1, GPX1, FAS, IL6, MDM2, NEFL, CCNB1	448	176	52817	0.00104136	1	0.00722042
biological_process	GO:0010817	regulation of hormone levels	13	FDXR, SLCO4A1, BIRC5, IL6, IL11, INHBB, RDH11, RETSAT, MEG3, CYP26B1, SCP2, VAMP2, UCP2	443	473	52520	0.00105391	1	0.00729814
cellular_component	GO:0031262	Ndc80 complex	3	NDC80, SPC25, NUF2	453	4	52989	0.0010604	1	0.00733377
biological_process	GO:0007127	meiosis I	6	FBXO5, PLK1, AURKA, TOP2A, PTTG1, ESPL1	450	85	52908	0.00106181	1	0.00733418
biological_process	GO:0035295	tube development	15	CDKN1A, PLXNB2, GPSM2, SMAD7, PGF, LGR4, RGMA, TIGAR, GRHL3, STIL, NRP1, CCNB1, NTN1, TRAF4, MICAL2	441	610	52383	0.00107055	1	0.00737581
cellular_component	GO:0036477	somatodendritic compartment	15	CYGB, PLK3, DPYSL2, ACSL4, TPX2, ZNF385A, ANG, GRIN2C, SERPINF1, GOPC, SHTN1, RANGAP1, LYNX1, AURKA, SUMO1	441	610	52383	0.00107055	1	0.00737581
cellular_component	GO:0005680	anaphase-promoting complex	4	UBE2C, UBE2S, BUB1B, CDC20	452	21	52972	0.00108596	1	0.00745939
biological_process	GO:0010458	exit from mitosis	4	UBE2C, UBE2S, BIRC5, ANLN	452	21	52972	0.00108596	1	0.00745939
biological_process	GO:0080135	regulation of cellular response to stress	15	GADD45A, DDIT3, ZNF385A, GPX1, MDM2, PCNA, TRIAP1, PMAIP1, POLH, TIGAR, EDA2R, SDF2, UBE2G2, YPEL3, TRAF4	441	611	52382	0.0010868	1	0.00745939
biological_process	GO:0060538	skeletal muscle organ development	8	FBXO22, NUPR1, GPX1, MEF2D, ATF3, MEG3, CYP26B1, BTG2	448	178	52815	0.001109	1	0.00760218
biological_process	GO:0018193	peptidyl-amino acid modification	23	ST6GALNAC2, PHF19, IL6, IL11, SMAD7, MDM2, KITLG, ASPH, ZDHHC9, PLK1, RAP2B, AURKA, TTK, UBE2G2, SUMO1, WEE1, XPC, SH3BP5L, NRP1, CCNB1, DYRK1B, AURKB, CDK1	433	1190	51803	0.00116939	1	0.00800605
biological_process	GO:1901796	regulation of signal transduction by p53 class mediator	5	ZNF385A, MDM2, RRM2B, TRIAP1, PMAIP1	451	50	52943	0.00117101	1	0.00800702
biological_process	GO:0000132	establishment of mitotic spindle orientation	4	NDC80, CENPA, GPSM2, SPDL1	452	22	52971	0.00122629	1	0.00836881
biological_process	GO:0043154	negative regulation of cysteine-type endopeptidase activity involved in apoptotic process	6	GPX1, BIRC5, FAS, IL6, TRIAP1, TNFRSF10B	450	88	52905	0.00122982	1	0.00836881
biological_process	GO:0043524	negative regulation of neuron apoptotic process	7	CEBPB, GCLM, BIRC5, NEFL, BTG2, NRP1, KIF14	449	132	52861	0.00123007	1	0.00836881
biological_process	GO:2001056	positive regulation of cysteine-type endopeptidase activity	7	CYFIP2, ACER2, FAS, ASPH, PMAIP1, DIABLO, TNFRSF10B	449	132	52861	0.00123007	1	0.00836881
molecular_function	GO:0008022	protein C-terminus binding	8	TRIM3, CENPF, BLOC1S2, MKI67, NEFL, VAMP2, TOP2A, CDC20	448	182	52811	0.00125461	1	0.00852507
biological_process	GO:0061351	neural precursor cell proliferation	7	TACC3, PLXNB2, ASPM, RACGAP1, BTG2, SHCBP1, KIF14	449	133	52860	0.00127649	1	0.00866293
biological_process	GO:0031344	regulation of cell projection organization	13	DPYSL2, CORO1C, PLXNB2, ARPIN, NEFL, SERPINF1, PLXNB3, RGMA, SHTN1, EPS8L2, NRP1, NTN1, CDC20	443	487	52506	0.0013398	1	0.00908123
biological_process	GO:0010389	regulation of G2/M transition of mitotic cell cycle	5	CENPF, CCNA2, TICRR, CDK1, KIF14	451	52	52941	0.00134195	1	0.00908446
molecular_function	GO:0042826	histone deacetylase binding	6	CEBPB, KPNA2, MEF2D, ANKRA2, TOP2A, CDC20	450	90	52903	0.00135224	1	0.00914274
biological_process	GO:0030900	forebrain development	11	TACC3, DPYSL2, E2F1, ASPM, H2AFX, NEFL, STIL, BTG2, NRP1, ARHGAP11B, KIF14	445	358	52635	0.00135971	1	0.00918183
cellular_component	GO:0043005	neuron projection	19	CYGB, PLK3, DPYSL2, TPX2, ZNF385A, CYFIP2, ANG, GRIN2C, NEFL, SERPINF1, SEPT5, GOPC, SHTN1, RANGAP1, LYNX1, AURKA, VAMP2, SUMO1, NRP1	437	899	52094	0.00140375	1	0.0094675
biological_process	GO:2000117	negative regulation of cysteine-type endopeptidase activity	6	GPX1, BIRC5, FAS, IL6, TRIAP1, TNFRSF10B	450	91	52902	0.00141671	1	0.00954302
biological_process	GO:0050770	regulation of axonogenesis	7	DPYSL2, PLXNB2, NEFL, RGMA, SHTN1, NRP1, NTN1	449	136	52857	0.0014238	1	0.00957893
biological_process	GO:0032844	regulation of homeostatic process	11	UBE2C, DDIT3, GCLM, UBE2S, HMGB2, BIRC5, SMAD7, KITLG, ASPH, UCP2, PIF1	445	361	52632	0.00144365	1	0.0097005
biological_process	GO:0060322	head development	16	TACC3, DPYSL2, E2F1, PLXNB2, ASPM, H2AFX, ASPH, NEFL, CCDC14, STIL, TPM3, ZFAND5, BTG2, NRP1, ARHGAP11B, KIF14	440	703	52290	0.00145663	1	0.00977559
cellular_component	GO:0072687	meiotic spindle	3	ASPM, AURKA, BORA	453	5	52988	0.0014762	1	0.00988252
biological_process	GO:0043146	spindle stabilization	3	AURKA, CCNB1, AURKB	453	5	52988	0.0014762	1	0.00988252
biological_process	GO:0051240	positive regulation of multicellular organismal process	25	CEBPB, DDIT3, ECT2, PLXNB2, FLRT2, ASPM, HMGB2, IL6, INHBB, KITLG, NEFL, SERPINF1, PGF, LGR4, MEG3, SULF2, CYP26B1, SHTN1, AURKA, NLRX1, TNFSF9, NRP1, CCNB1, NTN1, CDC20	431	1361	51632	0.00148009	1	0.00989641
biological_process	GO:0044723	single-organism carbohydrate metabolic process	16	ST6GALNAC2, ADAMTS7, C1GALT1C1, ACER2, IGFBP3, IL6, INPP1, ATF3, PMAIP1, PPP1R3C, TIGAR, SDF2, UBE2G2, SLC35A2, SESN2, STBD1	440	705	52288	0.00149637	1	0.00999294
biological_process	GO:0031647	regulation of protein stability	8	SMAD7, MDM2, ASPH, PLK1, PEX19, AURKA, SUMO1, DERL1	448	188	52805	0.00150061	1	0.010009
biological_process	GO:0001101	response to acid chemical	10	CEBPB, E2F1, GPX1, ACER2, IL6, NRF1, SERPINF1, CYP26B1, UCP2, CCNB1	446	302	52691	0.00152161	1	0.0101366
biological_process	GO:0030097	hemopoiesis	16	TACC3, CEBPB, CRIP2, ZNF385A, HMGB2, FAS, IL6, KITLG, ZBTB7A, ANLN, GPATCH4, CYP26B1, TCEA1, TOP2A, TNFSF9, PTBP3	440	709	52284	0.00157858	1	0.0105032
biological_process	GO:0071453	cellular response to oxygen levels	7	PLK3, E2F1, FAS, MDM2, PMAIP1, TIGAR, CCNB1	449	139	52854	0.00158372	1	0.0105117
biological_process	GO:2001020	regulation of response to DNA damage stimulus	7	ZNF385A, MDM2, PCNA, TRIAP1, PMAIP1, POLH, TIGAR	449	139	52854	0.00158372	1	0.0105117
cellular_component	GO:0016363	nuclear matrix	6	CEBPB, CENPF, CFL2, KIF4A, UHRF1, LMNB1	450	94	52899	0.00162371	1	0.010764
biological_process	GO:0072657	protein localization to membrane	13	OSBPL8, E2F1, STOM, ARL6IP1, FYB, ZDHHC9, PMAIP1, PEX19, SCP2, SSR3, VAMP2, SUMO1, NKD2	443	500	52493	0.00165998	1	0.0109911
molecular_function	GO:0046982	protein heterodimerization activity	12	CENPA, DDIT3, GCLM, GTF2A1, H2AFX, BIRC5, ATF3, NEFL, PGF, TAP1, TOP2A, HIST1H2AC	444	433	52560	0.00166286	1	0.0109967
biological_process	GO:0051223	regulation of protein transport	16	CDKN1A, TACC3, PLK3, ECT2, STOM, ANG, BIRC5, IL6, INHBB, ACHE, ASPH, LGR4, RANGAP1, VAMP2, UBE2G2, UCP2	440	714	52279	0.00168663	1	0.0111403
biological_process	GO:0006820	anion transport	14	OSBPL8, DPYSL2, ACSL4, SLCO4A1, RACGAP1, TRIAP1, SLC52A1, SCP2, VAMP2, SLC35E2B, SLC35A2, TTYH3, SLC4A11, SLC7A6	442	571	52422	0.00170652	1	0.011258
biological_process	GO:0009887	organ morphogenesis	19	CEBPB, GAMT, HOXA3, HOXC13, IL6, SMAD7, MEF2D, MKI67, NFIC, PGF, LGR4, CYP26B1, GRHL3, ACTA2, STIL, ZFAND5, NRP1, NTN1, MICAL2	437	927	52066	0.00173151	1	0.0114026
biological_process	GO:0000302	response to reactive oxygen species	8	PLK3, KLF6, ECT2, SESN1, GPX1, IL6, UCP2, SESN2	448	193	52800	0.00173301	1	0.0114026
biological_process	GO:1902749	regulation of cell cycle G2/M phase transition	5	CENPF, CCNA2, TICRR, CDK1, KIF14	451	56	52937	0.00173472	1	0.0114026
biological_process	GO:1901701	cellular response to oxygen-containing compound	20	CEBPB, OSBPL8, KLF6, E2F1, ECT2, GRIN2C, HMGB2, BIRC5, IL6, INHBB, KITLG, NEFL, SERPINF1, PRKAB1, CYP26B1, RANGAP1, VAMP2, UCP2, CCNB1, TP53INP1	436	1014	51979	0.00173757	1	0.0114075
biological_process	GO:0043547	positive regulation of GTPase activity	13	TBC1D3G, ECT2, CORO1C, RACGAP1, DEPDC1, DEPDC1B, GRHL3, RALGDS, RANGAP1, EPS8L2, ARHGEF39, ARHGAP29, ARHGAP11A	443	503	52490	0.00174217	1	0.0114239
cellular_component	GO:0031966	mitochondrial membrane	15	PLA2G4B, MRPL10, SPATA18, COX15, ACSL4, FDXR, MRPS27, NDUFA5, PMAIP1, ATAD3A, PRODH, TIGAR, UCP2, NLRX1, SLC25A46	441	645	52348	0.00177635	1	0.011634
biological_process	GO:0010563	negative regulation of phosphorus metabolic process	13	CDKN1A, CDKN2C, UBE2C, GADD45A, CORO1C, IGFBP3, IL6, SMAD7, ATF3, PLK1, TIGAR, SH3BP5L, CCNB1	443	505	52488	0.0017988	1	0.0117527
biological_process	GO:0045936	negative regulation of phosphate metabolic process	13	CDKN1A, CDKN2C, UBE2C, GADD45A, CORO1C, IGFBP3, IL6, SMAD7, ATF3, PLK1, TIGAR, SH3BP5L, CCNB1	443	505	52488	0.0017988	1	0.0117527
biological_process	GO:0034504	protein localization to nucleus	10	TOB1, CDKN1A, TACC3, OSBPL8, ECT2, FYB, IL6, KPNA2, MDM2, SUMO1	446	310	52683	0.0018083	1	0.0117899
biological_process	GO:0048812	neuron projection morphogenesis	18	ARPC5, DPYSL4, DPYSL2, PLXNB2, FLRT2, KIF4A, GRIN2C, KITLG, NEFL, PLXNB3, MEG3, RGMA, SHTN1, AURKA, WEE1, KLF7, NRP1, NTN1	438	832	52161	0.00180883	1	0.0117899
biological_process	GO:0007409	axonogenesis	16	ARPC5, DPYSL4, DPYSL2, PLXNB2, FLRT2, KIF4A, GRIN2C, KITLG, NEFL, PLXNB3, MEG3, RGMA, SHTN1, KLF7, NRP1, NTN1	440	721	52272	0.00184823	1	0.0120323
biological_process	GO:0010950	positive regulation of endopeptidase activity	7	CYFIP2, ACER2, FAS, ASPH, PMAIP1, DIABLO, TNFRSF10B	449	144	52849	0.00188016	1	0.0122256
biological_process	GO:0006066	alcohol metabolic process	11	PLA2G4B, FDXR, ACER2, INPP1, ITPK1, ACHE, RDH11, RETSAT, SCP2, TM7SF2, EBPL	445	375	52618	0.00189293	1	0.0122939
biological_process	GO:0046685	response to arsenic-containing substance	4	CDKN1A, ATF3, NEFL, SERPINF1	452	26	52967	0.00189971	1	0.0123085
biological_process	GO:0000083	regulation of transcription involved in G1/S transition of mitotic cell cycle	4	E2F1, FBXO5, PCNA, CDK1	452	26	52967	0.00189971	1	0.0123085
cellular_component	GO:0000796	condensin complex	3	NCAPH, NCAPG, NCAPD2	453	6	52987	0.00195718	1	0.0126423
biological_process	GO:0090306	spindle assembly involved in meiosis	3	ASPM, FBXO5, AURKA	453	6	52987	0.00195718	1	0.0126423
biological_process	GO:0070059	intrinsic apoptotic signaling pathway in response to endoplasmic reticulum stress	5	CEBPB, DDIT3, PMAIP1, CHAC1, TNFRSF10B	451	58	52935	0.00195821	1	0.0126423
molecular_function	GO:0008047	enzyme activator activity	12	TBC1D3G, CDKN1A, DBF4, ECT2, RACGAP1, IGFBP3, DEPDC1, DEPDC1B, RANGAP1, ARHGAP11B, ARHGAP29, ARHGAP11A	444	443	52550	0.00197703	1	0.0127487
biological_process	GO:0009612	response to mechanical stimulus	8	GADD45A, FAS, IL6, INHBB, XPC, BTG2, TNFRSF10B, CCNB1	448	199	52794	0.00204775	1	0.0131734
biological_process	GO:2001234	negative regulation of apoptotic signaling pathway	8	ZNF385A, GCLM, GPX1, HMGB2, RRM2B, TRIAP1, G2E3, NRP1	448	199	52794	0.00204775	1	0.0131734
biological_process	GO:1901989	positive regulation of cell cycle phase transition	5	UBE2C, BIRC5, MDM2, PLK1, FAM83D	451	59	52934	0.00207708	1	0.0133463
biological_process	GO:1901566	organonitrogen compound biosynthetic process	24	TOB1, ST6GALNAC2, MRPL10, COX15, HACD2, AK1, MRPS27, GAMT, ZNF385A, GCLM, ANG, ACER2, IL6, ACHE, AK3, NADSYN1, BCAT1, NME1-NME2, SSR3, TCEA1, EIF3CL, BTG2, EIF3C, TICRR	432	1315	51678	0.00208615	1	0.0133888
biological_process	GO:1903829	positive regulation of cellular protein localization	10	PLK3, E2F1, ECT2, STOM, IL6, ASPH, PMAIP1, VAMP2, NKD2, CCNB1	446	317	52676	0.00209321	1	0.0134182
biological_process	GO:1901797	negative regulation of signal transduction by p53 class mediator	4	ZNF385A, MDM2, RRM2B, TRIAP1	452	27	52966	0.00209755	1	0.0134302
cellular_component	GO:0097458	neuron part	22	CYGB, PLK3, DPYSL2, ACSL4, TPX2, ZNF385A, CYFIP2, ANG, GPX1, GRIN2C, NEFL, RDH11, SERPINF1, SEPT5, GOPC, SHTN1, RANGAP1, LYNX1, AURKA, VAMP2, SUMO1, NRP1	434	1183	51810	0.00212382	1	0.0135824
[truncated: 4,586 more rows]

## Sheet: gomap_genes
InID	OutID	GOID	Term	Namespace	count	PValue	Bonferroni	FDR	Gene_ID	Gene_Symbol	Transcript_ID	A549_2/A549_1.fc	A549_2/A549_1.volume	A549_3/A549_1.fc	A549_3/A549_1.volume	A549_4/A549_1.fc	A549_4/A549_1.volume	A549_4/A549_2.fc	A549_4/A549_2.volume	A549_4/A549_3.fc	A549_4/A549_3.volume	N_A549_1	N_A549_2	N_A549_3	N_A549_4
[truncated: 48,149 more rows]
